# Supplementary material for: Pathogenetic Insights in Developmental Coordination Disorder Reveal Substantial Overlap with Movement Disorders
Source: Preprints.org preprint supplement (doi:10.20944/preprints202310.0167.v1), 2023-10-04
Supplement: Supplementary file 1 [file supplementary]

## Sheet: Read_me
Legend
_MEMBER_Ataxia				Pathway enrichment in ataxia genes; 1= yes, 0= no
_MEMBER_Chorea				Pathway enrichment in chorea genes; 1= yes, 0= no
_MEMBER_DCD				Pathway enrichment in DCD-associated genes; 1= yes, 0= no
_MEMBER_Dystonia				Pathway enrichment in dystonia genes; 1= yes, 0= no
_MEMBER_Myoclonus				Pathway enrichment in myoclonus genes; 1= yes, 0= no
_LogP_Ataxia				p-value in log-base 10 of the pathway for ataxia genes
_LogP_Chorea				p-value in log-base 10 of the pathway for chorea genes
_LogP_DCD				p-value in log-base 10 of the pathway for DCD-associated genes
_LogP_Dystonia				p-value in log-base 10 of the pathway for dystonia genes
_LogP_Myoclonus				p-value in log-base 10 of the pathway for myoclonus genes
ID				Identificative number for the biological pathway term
Category				Category where biological pathway terms belongs (GO, KEGG, Reactome Gene Sets)
Description				Descriptive term for the biological pathway
PARENT_GO				Only given for GO biological pathways, represent the broader term which each GO biological pathway is part of
LogP				p-value in log-base 10
Enrichment				Enrichment score
Z-score				z-score
Genes				Genes enriched in the pathway
Log(q-value)				p-value in log-base 10, corrected for multiple testing
GROUP_ID				Membership of the pathway to a specific cluster (indicated with numbers), based on similarities (p-values, functions, enrichment)
FirstInGroupByEnrichment				Indication of the cluster representative term (i.e., umbrella term, most enriched within the cluster); 1= yes, 0= no
FirstInGroupByLogP				Indication of the cluster representative term (i.e., umbrella term, with the strongest p-value within the cluster); 1= yes, 0= no
The sheet "All pathways" contains all pathways (n= 2269) enriched for the genes associated with either DCD, ataxia, chorea, dystonia, myoclonus or for several disorders simultaneously
The sheet "Shared pathways" contains the pathways (n= 543) enriched for the genes associated with DCD and for at least one or more movement disorders (ataxia and/or chorea and/or dystonia and/or myoclonus).

## Sheet: All pathways
_MEMBER_Ataxia	_MEMBER_Chorea	_MEMBER_DCD	_MEMBER_Dystonia	_MEMBER_Myoclonus	_LogP_Ataxia	_LogP_Chorea	_LogP_DCD	_LogP_Dystonia	_LogP_Myoclonus	ID	Category	Description	PARENT_GO	LogP	Enrichment	Z-score	Genes	Log(q-value)	GROUP_ID	FirstInGroupByEnrichment	FirstInGroupByLogP
1	1	1	0	1	-2.15455e+16	-928641261290675	-3.2528e+16	0.0	-1998048094412280	GO:0050804	GO Biological Processes	modulation of chemical synaptic transmission	19_GO:0050789 regulation of biological process	-4532646409581780	5492017147821620	1.98974e+16	APBA1|APP|ATP2A2|BCR|CACNA1A|CDH2|CHRNB2|CLN3|DLG4|DNM1|PTK2B|GFAP|GRIA2|GRIA3|GRID2|GRIK2|GRIK5|GRIN1|GRM3|GSK3B|KCNJ10|MAP1A|MAP1B|MAPT|MECP2|MPP2|NF1|NTRK2|OPHN1|PAFAH1B1|SEPTIN5|PRKCG|PRNP|LGMN|RELN|PSEN1|PSMC5|PTPRD|SLC6A1|SLC8A2|SLC8A3|SNAP25|CDKL5|STXBP1|SYN1|TNR|UBE3A|YWHAG|FXR1|PLA2G6|PPFIA3|SYNGAP1|SQSTM1|INA|NEURL1|NRXN1|NRXN2|RAPGEF2|RIMS2|CLSTN3|RIMS3|CPLX2|CPLX1|FAM107A|DLGAP4|CLSTN…	-4.11933e+16	1.0	1.0	1.0
1	1	1	0	1	-214683439709647	-927111325340305	-3249161002181790	0.0	-1995262901168600	GO:0099177	GO Biological Processes	regulation of trans-synaptic signaling	19_GO:0050789 regulation of biological process	-4524086706120740	5480854511342310	1.98685e+16	APBA1|APP|ATP2A2|BCR|CACNA1A|CDH2|CHRNB2|CLN3|DLG4|DNM1|PTK2B|GFAP|GRIA2|GRIA3|GRID2|GRIK2|GRIK5|GRIN1|GRM3|GSK3B|KCNJ10|MAP1A|MAP1B|MAPT|MECP2|MPP2|NF1|NTRK2|OPHN1|PAFAH1B1|SEPTIN5|PRKCG|PRNP|LGMN|RELN|PSEN1|PSMC5|PTPRD|SLC6A1|SLC8A2|SLC8A3|SNAP25|CDKL5|STXBP1|SYN1|TNR|UBE3A|YWHAG|FXR1|PLA2G6|PPFIA3|SYNGAP1|SQSTM1|INA|NEURL1|NRXN1|NRXN2|RAPGEF2|RIMS2|CLSTN3|RIMS3|CPLX2|CPLX1|FAM107A|DLGAP4|CLSTN…	-4.11933e+16	1.0	0.0	0.0
1	1	1	0	1	-1091195103513680	-5635748793060520	-1.63179e+16	0.0	-1.88425e+16	GO:0007610	GO Biological Processes	behavior	19_GO:0032501 multicellular organismal process	-379525567398457	4499925606308580	1732888263141860	ABCA2|ADCY5|AMFR|APBA1|APP|ASTN1|CHRNA4|CHRNB2|CLN3|CNTN1|CSTB|DAB1|DLG4|CLN8|FGF12|FXN|MTOR|B4GALNT1|GBA1|GLRA1|GLRB|GRIK2|GRIN1|HTT|HEXA|HEXB|HPRT1|KCND2|KCNJ10|MAN2B1|MAP1A|MAPT|MECP2|ATXN3|NF1|NPC1|NPHP1|SLC11A2|NTRK2|PAFAH1B1|SEPTIN5|PPT1|PRKCG|PRNP|LGMN|RELN|PSEN1|ATXN1|SCN1A|SCN2A|SLC6A1|SLC6A3|SLC8A2|SLC8A3|SNAP25|SPTBN2|ABCC8|TH|NKX2-1|TNR|UBE3A|UCHL1|VLDLR|WFS1|AAAS|PLA2G6|SYNGAP1|SYNJ1…	-3.40811e+16	1.0	0.0	0.0
1	1	0	1	1	-1.98868e+16	-430949058508015	0.0	-767309932021982	-3484263029502150	hsa04142	KEGG Pathway	Lysosome		-3484263029502150	2.70067e+16	2804589973799470	AGA|ASAH1|ATP6V0C|ATP6V0A1|ATP6AP1|SCARB2|TPP1|CLN3|CLN5|CLTC|CTSB|CTSD|DNASE2|GBA1|HEXA|IGF2R|LAMP1|LAMP2|LIPA|MANBA|NEU1|NPC1|SLC11A2|CTSA|PPT1|PSAP|SORT1|SMPD1|DMXL2|GNPTG|MFSD8	-3.04941e+16	2.0	1.0	1.0
1	1	0	1	1	-1.42923e+16	-7380982552251760	0.0	-1.42581e+16	-1.56987e+16	GO:0030163	GO Biological Processes	protein catabolic process	19_GO:0008152 metabolic process	-3245773845515610	3757027197053270	1.53347e+16	ADAM10|AMFR|ARRB1|ATM|CALR|CANX|TPP1|CLN3|CLN5|CTSB|CTSD|DDB1|TOR1A|CLN8|MTOR|GBA1|GLB1|GSK3B|LAMP2|LIPA|MANBA|ATXN3|PEX10|PPT1|DNAJC3|LGMN|PSEN1|PSMA7|PSMC4|PSMC5|PSMC6|PSMD1|PSMD2|PSMD3|SEL1L|TAF1|HSP90B1|UBA1|UBE2A|UBE3A|UCHL1|VCP|WFS1|RAB7A|STAM|USP5|USP9X|BAP1|CUL4B|CUL3|CUL2|CDC23|CTSF|SQSTM1|NAE1|BRSK2|UBE4A|LONP1|PSMF1|PSMD6|PJA2|DPP3|STUB1|APC2|ZER1|USP20|MAN1B1|RNF13|VPS13A|ECPAS|ANAPC1…	-2.87165e+16	3.0	1.0	1.0
0	1	1	0	1	0.0	-6632742662317690	-2.89063e+16	0.0	-1.33159e+16	GO:0099536	GO Biological Processes	synaptic signaling	19_GO:0050789 regulation of biological process	-3236609174438480	4801479701917330	1.62359e+16	APBA1|CACNA1A|CHRNA4|CHRNB2|DLG4|FGF12|GABRA3|GLRA1|GLRB|GRIA2|GRIA3|GRID2|GRIK2|GRIK5|GRIN1|GRM3|GSK3B|ITPR1|KCND2|KCNQ2|KCNQ3|KIF5A|KPNA1|MECP2|ATXN3|MPP2|NF1|NTRK2|PAFAH1B1|PDYN|PLP1|SEPTIN5|PPT1|PRKCG|PSEN1|PTPRD|PTPRN2|RIT2|RPS6KA3|SLC6A1|SLC6A3|SNAP25|STXBP1|SYN1|TH|TNR|PPFIA3|CADPS|SYNJ1|CACNA1G|BSN|SLC6A5|NRXN1|NRXN2|RIMS2|CLSTN3|SNPH|RIMS3|SLC12A6|CPLX2|CPLX1|HRH3|SLITRK3|RIMS1|UNC13A|ER…	-2.87165e+16	4.0	1.0	1.0
0	1	1	0	1	0.0	-6256798149388090	-2.87429e+16	0.0	-1.39817e+16	GO:0099537	GO Biological Processes	trans-synaptic signaling	19_GO:0050789 regulation of biological process	-3.13166e+16	4879738252401800	1.6028e+16	APBA1|CACNA1A|CHRNA4|CHRNB2|DLG4|FGF12|GABRA3|GLRA1|GLRB|GRIA2|GRIA3|GRID2|GRIK2|GRIK5|GRIN1|GRM3|GSK3B|KCND2|KCNQ2|KCNQ3|KIF5A|MECP2|ATXN3|MPP2|NF1|NTRK2|PAFAH1B1|PDYN|PLP1|SEPTIN5|PPT1|PRKCG|PSEN1|PTPRD|PTPRN2|RIT2|RPS6KA3|SLC6A1|SLC6A3|SNAP25|STXBP1|SYN1|TH|TNR|PPFIA3|CADPS|SYNJ1|CACNA1G|BSN|SLC6A5|NRXN1|NRXN2|RIMS2|CLSTN3|SNPH|RIMS3|SLC12A6|CPLX2|CPLX1|HRH3|SLITRK3|RIMS1|UNC13A|ERC1|KIF1B|SYT…	-2.77462e+16	4.0	0.0	0.0
1	1	1	1	1	-1.31497e+16	-2903793419631690	-3.53192e+16	-1.36069e+16	-1.34623e+16	GO:0061024	GO Biological Processes	membrane organization	19_GO:0009987 cellular process	-3089365911474380	3.69213e+16	1.48935e+16	ABCA2|ABCA3|ABCD1|ANK2|ATP2A2|BCS1L|CDH2|CLN3|TIMM8A|DLG4|DNM1|TOR1A|CLN8|FOLR1|GLRB|GSK3B|HSPA9|LMNB1|MTTP|NPC1|NRCAM|OPA1|PAFAH1B1|PPT1|RELN|PTPRD|RAB1A|SEC13|SMPD1|SNAP25|SPG7|SPTBN1|STXBP1|VAMP1|TTPA|VDAC2|VRK1|RAB7A|REEP5|STAM|STX7|GNPAT|CUL3|USO1|GBF1|NAPG|SYNJ1|AP3D1|NRXN1|NRXN2|GOSR2|PITPNM1|ABCG1|NUP155|SEC24C|EMC2|SNAP91|ATP9A|TMEM147|SEC23B|NPC2|AFG3L2|IMMT|RER1|SCAP|RIMS1|SYT11|EXOC6B…	-2739019918932160	5.0	1.0	1.0
1	1	1	1	1	-1.38906e+16	-4769735883108410	-9531099449980310	-6.40659e+16	-879010797472591	GO:0007420	GO Biological Processes	brain development	19_GO:0032502 developmental process	-3.08072e+16	3.62796e+16	1.48112e+16	AARS1|ACAT1|ACTB|APLP1|APP|ATIC|ATM|RERE|ATP1A3|ATP2B1|ATP2B2|BCR|CALM1|CDH2|CHRNB2|CLN5|CNTN1|CTNNA2|DAB1|DLG4|CELSR2|FOXG1|GART|GBA1|GRID2|GRIN1|ARHGAP35|GSK3B|HPCA|HPRT1|KCNA2|MECP2|NARS1|NDUFS3|NDUFS4|NF1|NRCAM|NTRK2|OGDH|OPHN1|PAFAH1B1|PLP1|PPT1|PRKDC|RELN|PSEN1|ATXN1|SLC2A1|SLC6A3|SLIT1|SPTBN2|TAF1|TH|NKX2-1|TNR|TUBB2A|UBE3A|XRCC1|FXR1|GNPAT|ATRN|SYNJ1|EIF2B5|ATP6V0D1|INA|NEURL1|ADGRG1|PITP…	-2.73617e+16	6.0	1.0	1.0
1	1	1	0	1	-4122404637172210	-6060893447237190	-1.51942e+16	0.0	-1531027977104480	GO:0007611	GO Biological Processes	learning or memory	19_GO:0032501 multicellular organismal process	-3.04144e+16	6012761606624420	1661782779886820	AMFR|APP|CHRNB2|CLN3|DLG4|CLN8|GRIN1|HTT|MAN2B1|MAP1A|MAPT|MECP2|NF1|SLC11A2|NTRK2|PAFAH1B1|PPT1|PRKCG|PRNP|LGMN|RELN|PSEN1|ATXN1|SCN2A|SLC6A1|SLC8A2|SLC8A3|SNAP25|ABCC8|TH|TNR|UBE3A|VLDLR|AAAS|PLA2G6|SYNGAP1|SYNJ1|NRXN1|NRXN2|PJA2|ARL6IP5|CIC|SYT11|PLCB1|DDHD2|CUX2|CRTC1|NCSTN|MAPK8IP2|NPTN|GIT1|TMOD2|GPR88|PAK6|PAK5|JPH3|SLC12A5|CSMD1|SPG11|PRRT1|PPP1R1B|JPH4|SHANK3	-2.70201e+16	1.0	0.0	0.0
1	1	1	0	1	-3.50117e+16	-7065856605185920	-161579818943776	0.0	-1501924919298780	GO:0050890	GO Biological Processes	cognition	19_GO:0032501 multicellular organismal process	-3.01814e+16	5570073008752250	1624393768620100	AMFR|APP|CHRNA4|CHRNB2|CLN3|DLG4|CLN8|GRIN1|HTT|MAN2B1|MAP1A|MAPT|MECP2|NF1|SLC11A2|NTRK2|PAFAH1B1|PPT1|PRKCG|PRNP|LGMN|RELN|PSEN1|ATXN1|SCN2A|SLC6A1|SLC8A2|SLC8A3|SNAP25|ABCC8|TH|TNR|UBE3A|VLDLR|AAAS|PLA2G6|SYNGAP1|SYNJ1|NRXN1|NRXN2|PJA2|DGCR2|ARL6IP5|FAM107A|HRH3|CIC|SYT11|PLCB1|DDHD2|CUX2|CRTC1|NCSTN|MAPK8IP2|NPTN|GIT1|TMOD2|GPR88|PAK6|PAK5|JPH3|SLC12A5|CSMD1|SPG11|PRRT1|PPP1R1B|JPH4|SHANK3	-2685515363052290	1.0	0.0	0.0
0	1	1	0	1	0.0	-6465527207226680	-2.81181e+16	0.0	-1.25431e+16	GO:0007268	GO Biological Processes	chemical synaptic transmission	19_GO:0050789 regulation of biological process	-3.01167e+16	487673976508928	1.57092e+16	APBA1|CACNA1A|CHRNA4|CHRNB2|DLG4|FGF12|GABRA3|GLRA1|GLRB|GRIA2|GRIA3|GRID2|GRIK2|GRIK5|GRIN1|GRM3|GSK3B|KCND2|KCNQ2|KCNQ3|KIF5A|MECP2|ATXN3|MPP2|NF1|PAFAH1B1|PDYN|PLP1|SEPTIN5|PPT1|PRKCG|PSEN1|PTPRN2|RIT2|RPS6KA3|SLC6A1|SLC6A3|SNAP25|STXBP1|SYN1|TH|TNR|PPFIA3|CADPS|SYNJ1|CACNA1G|BSN|SLC6A5|NRXN1|NRXN2|RIMS2|CLSTN3|SNPH|RIMS3|SLC12A6|CPLX2|CPLX1|HRH3|SLITRK3|RIMS1|UNC13A|ERC1|KIF1B|SYT11|PIP5K1C|M…	-2685515363052290	4.0	0.0	0.0
0	1	1	0	1	0.0	-6465527207226680	-2.81181e+16	0.0	-1.25431e+16	GO:0098916	GO Biological Processes	anterograde trans-synaptic signaling	19_GO:0050789 regulation of biological process	-3.01167e+16	487673976508928	1.57092e+16	APBA1|CACNA1A|CHRNA4|CHRNB2|DLG4|FGF12|GABRA3|GLRA1|GLRB|GRIA2|GRIA3|GRID2|GRIK2|GRIK5|GRIN1|GRM3|GSK3B|KCND2|KCNQ2|KCNQ3|KIF5A|MECP2|ATXN3|MPP2|NF1|PAFAH1B1|PDYN|PLP1|SEPTIN5|PPT1|PRKCG|PSEN1|PTPRN2|RIT2|RPS6KA3|SLC6A1|SLC6A3|SNAP25|STXBP1|SYN1|TH|TNR|PPFIA3|CADPS|SYNJ1|CACNA1G|BSN|SLC6A5|NRXN1|NRXN2|RIMS2|CLSTN3|SNPH|RIMS3|SLC12A6|CPLX2|CPLX1|HRH3|SLITRK3|RIMS1|UNC13A|ERC1|KIF1B|SYT11|PIP5K1C|M…	-2685515363052290	4.0	0.0	0.0
1	1	0	1	1	-1.56996e+16	-8062492697483080	0.0	-1.37622e+16	-7833285046619740	GO:0006886	GO Biological Processes	intracellular protein transport	19_GO:0051179 localization	-2.98444e+16	3.76596e+16	1.47019e+16	AP2A1|AP1B1|APBA1|ARL1|ATP6AP1|BCR|BCS1L|CALR|SCARB2|CLTC|COPA|COPB1|CSE1L|TIMM8A|GFAP|HSPA9|KIF5A|KPNA1|LAMP2|MAP1A|NF1|PEX6|PEX7|PEX10|PIK3R1|CTSA|PEX2|RAB1A|RAB6A|RTN2|SORT1|SEC13|SEL1L|SRP54|SRPRA|SSR1|STXBP1|HSP90B1|VCP|YWHAG|RAB7A|NUP214|STAM|USP9X|STX7|PEX3|USO1|NAPG|SQSTM1|AP3D1|AIFM1|COPB2|PMPCB|NUP155|SEC24C|RIMS2|POM121|TECPR2|BCAP31|SEC23B|PITRM1|YWHAQ|COPG1|RIMS1|MAPK8IP3|PMPCA|VPS13…	-2.6642e+16	7.0	1.0	1.0
1	1	1	0	1	-3.49233e+16	-735589660026732	-2.1524e+16	0.0	-1024163261731990	GO:0048167	GO Biological Processes	regulation of synaptic plasticity	19_GO:0050789 regulation of biological process	-2899196425999460	6798101898101890	1.67174e+16	APP|CLN3|DLG4|PTK2B|GFAP|GRID2|GRIK2|GRIN1|GSK3B|KCNJ10|MAP1A|MAP1B|MAPT|MECP2|MPP2|NF1|NTRK2|PRKCG|PRNP|LGMN|RELN|PSEN1|SLC8A2|SLC8A3|SNAP25|STXBP1|TNR|YWHAG|FXR1|PPFIA3|SYNGAP1|SQSTM1|NEURL1|RAPGEF2|RIMS2|RIMS3|CPLX2|FAM107A|RIMS1|ERC1|NCDN|CRTC1|NCSTN|NPTN|NSG1|SLC4A10|JPH3|ABHD6|PRRT1|JPH4|SHANK3|RIMS4|CNTN4|LRRTM1	-2.58195e+16	1.0	0.0	0.0
1	0	0	1	1	-2.84658e+16	0.0	0.0	-1.77617e+16	-6205608313444220	GO:0043603	GO Biological Processes	amide metabolic process	19_GO:0008152 metabolic process	-2.84658e+16	5491965403182540	1.57789e+16	AARS1|ABCA2|ACAT1|ABCD1|APEH|ASAH1|BTD|TPP1|CLN5|DLD|EIF2B1|EPRS1|FOLR1|GALC|B4GALNT1|GBA1|GSS|HEXA|HEXB|HSD17B4|LTA4H|MVK|NARS1|NCBP1|NIT1|PNP|OTC|PDHB|PSEN1|PSEN2|RARS1|SMPD1|ELOVL4|TUFM|ALDH5A1|PDHX|EIF2B4|EIF2B3|EIF2B2|EIF2B5|NPEPPS|SKIC3|SLC25A15|SPTLC1|GCN1|COPS5|TCF25|NCSTN|HARS2|LARS1|DHX29|CLN6|PTCD3|DARS2|IARS2|MCCC1|VARS2|AARS2|ELOVL5|FA2H|PANK2|TARS2|HM13|GFM1|MTFMT	-2.48954e+16	8.0	1.0	1.0
1	1	0	1	1	-2.38827e+16	-3221013868138370	0.0	-6313102459038320	-2.79133e+16	hsa05017	KEGG Pathway	Spinocerebellar ataxia		-2.83763e+16	8319355469705110	1.73952e+16	ATP2A2|CACNA1A|DAB1|FGF14|MTOR|GRIA2|GRIA3|GRIN1|ITPR1|KCNC3|KCND3|ATXN3|OPA1|PDYN|PIK3R1|PIK3R2|PRKCG|RELN|PSMA7|PSMC4|PSMC5|PSMC6|PSMD1|PSMD2|PSMD3|ATXN1|ATXN2|ATXN8OS|SPTBN2|TBP|VDAC2|VLDLR|PUM1|ATG13|PSMD6|NOP56|AFG3L2|CIC|PLCB1|PUM2|ATXN10|PIK3R4|ATG2B|TWNK|BEAN1	-2523185807429490	9.0	1.0	1.0
1	1	0	1	1	-8656511883515980	-6727395006002080	0.0	-1848945545878440	-7999617905248340	R-HSA-199991	Reactome Gene Sets	Membrane Trafficking		-2.80677e+16	3.83629e+16	1.43105e+16	ACTB|AP2A1|AP1B1|ANK2|APP|ARL1|ARRB1|KIF1A|CALM1|CAPZB|SCARB2|CLTC|COPA|COPB1|CPD|DNM1|DNASE2|DYNC1H1|TOR1A|FOLR1|FTL|GDI1|GPS1|IGF2R|KIF3C|KIF5A|MAN2A2|PAFAH1B1|RAB1A|RAB6A|SORT1|SBF1|SEC13|SH3GL2|SPTB|SPTBN1|SPTBN2|TPD52L1|TUBB2A|YWHAG|RAB7A|STAM|PLA2G6|USO1|GBF1|NAPG|SYNJ1|ZW10|COPB2|GOSR2|SEC24C|PUM1|DNAJC6|SNAP91|ACTR3|TUBB4A|COG5|TGOLN2|KIF1C|COPS8|YWHAQ|COPS5|COPG1|PPP6R1|KIFAP3|KIF1B|SYT1…	-2494955244841920	10.0	1.0	1.0
1	1	0	1	1	-8036433356776230	-6334437089585790	0.0	-1765483211161330	-9561785187963320	R-HSA-5653656	Reactome Gene Sets	Vesicle-mediated transport		-2803808007278380	3731829092155980	1421042296372490	ACTB|AP2A1|AP1B1|ANK2|APP|ARL1|ARRB1|KIF1A|CALM1|CALR|CAPZB|SCARB2|CLTC|COPA|COPB1|CPD|DNM1|DNASE2|DYNC1H1|TOR1A|FOLR1|FTL|GDI1|GPS1|IGF2R|KIF3C|KIF5A|LRP1|MAN2A2|PAFAH1B1|RAB1A|RAB6A|SORT1|SBF1|SEC13|SH3GL2|SPTB|SPTBN1|SPTBN2|TPD52L1|HSP90B1|TUBB2A|YWHAG|RAB7A|STAM|PLA2G6|USO1|GBF1|NAPG|SYNJ1|ZW10|COPB2|GOSR2|SEC24C|PUM1|DNAJC6|SNAP91|ACTR3|TUBB4A|COG5|TGOLN2|KIF1C|COPS8|YWHAQ|COPS5|COPG1|PPP6R1…	-2.49448e+16	10.0	0.0	0.0
0	1	1	1	1	0.0	-6816451776090150	-1.52471e+16	-9139452275042350	-1.01648e+16	GO:0099003	GO Biological Processes	vesicle-mediated transport in synapse	19_GO:0051179 localization	-2.72374e+16	7.87859e+16	1.6801e+16	AP2A1|ATP6V1A|ATP6V0A1|ATP6AP1|CANX|CDH2|DDC|DNM1|OPHN1|SEPTIN5|PSEN1|SH3GL2|SNAP25|STXBP1|SYN1|TH|PPFIA3|CADPS|SYNJ1|BSN|AP3D1|ATP6V0D1|RIMS2|SNPH|RIMS3|DNAJC6|SNAP91|ATP6AP2|CPLX2|CPLX1|CLSTN1|RIMS1|UNC13A|SYT11|PIP5K1C|NSG1|GIT1|ATP6V1D|ATP6V1H|VPS35|TBC1D24|DNAJC5|BLTP1|STX1B|RIMS4	-2.41676e+16	4.0	0.0	0.0
1	1	1	1	1	-416961129242442	-5141631114478250	-2595662003114340	-9059148430775670	-2.12482e+16	GO:0019725	GO Biological Processes	cellular homeostasis	19_GO:0042592 homeostatic process	-2.70883e+16	3.69166e+16	1.39268e+16	ABCA2|ABCB7|ANK2|APP|ATP1A3|ATP2A2|ATP2B1|ATP2B2|ATP2B3|ATP5F1B|ATP6V1A|ATP6V0C|ATP6V0A1|ATP6AP1|ATP7B|CALR|CLCN6|CLN3|CLN5|CP|FXN|FTL|GRN|GRIK2|GRIK5|HEXB|ITPR1|LAMP2|MAP1A|SLC11A2|PIK3R1|PIK3R2|PPT1|PRNP|PSEN1|PTPRN|PTPRN2|RAP1GDS1|SLC8A2|SLC8A3|ABCC8|PRDX2|TMBIM6|TH|HSP90B1|UBE3A|WFS1|XK|RAB7A|SLC39A7|BAP1|ATP6V0D1|SLC12A6|ABCB6|BCAP31|ATP6AP2|SLC9A6|AFG3L2|IMMT|ABCB8|WDTC1|PACS2|DMXL2|SLC9A8|…	-2.4062e+16	11.0	1.0	1.0
1	1	1	1	1	-666753222958191	-2156307101217230	-7302571163524820	-4135908251412950	-1886981448133180	GO:0098660	GO Biological Processes	inorganic ion transmembrane transport	19_GO:0051179 localization	-2.7039e+16	3534559574123010	1.37734e+16	ABCB7|ATP1A3|ATP2A2|ATP2B1|ATP2B2|ATP2B3|ATP5F1B|ATP6V1A|ATP6V0C|ATP6V0A1|ATP6AP1|ATP7B|HCN2|CACNA1A|CLCN2|CLCN4|CLCN6|CLCN7|COX15|FXN|GABRA3|GLRA1|GLRB|GPM6A|GRIN1|ITPR1|KCNA2|KCNC3|KCND1|KCND2|KCND3|KCNJ10|KCNJ11|KCNQ2|KCNQ3|ATP6|SLC11A2|PSEN1|SCN1A|SCN2A|SCN8A|SLC6A1|SLC6A3|SLC6A8|SLC8A2|SLC8A3|SNAP25|ABCC8|SURF1|UQCRC1|SLC39A7|SLC25A11|CACNA1I|CACNA1G|ATP6V0D1|SLC6A5|SLC33A1|CACNA2D2|PMPCB|SL…	-2.40329e+16	11.0	0.0	0.0
1	1	1	1	1	-4915115568100740	-4246797043049880	-2230187827672820	-9892731080557400	-2109954430938180	GO:0055082	GO Biological Processes	intracellular chemical homeostasis	19_GO:0042592 homeostatic process	-2.676e+16	3.97977e+16	1.40865e+16	ABCA2|ABCB7|ANK2|APP|ATP1A3|ATP2A2|ATP2B1|ATP2B2|ATP2B3|ATP5F1B|ATP6V1A|ATP6V0C|ATP6V0A1|ATP6AP1|ATP7B|CALR|CLN3|CLN5|CP|FXN|FTL|GRN|GRIK2|GRIK5|HEXB|ITPR1|SLC11A2|PIK3R1|PIK3R2|PPT1|PRNP|PSEN1|PTPRN|PTPRN2|RAP1GDS1|SLC8A2|SLC8A3|ABCC8|TMBIM6|TH|HSP90B1|UBE3A|WFS1|XK|RAB7A|SLC39A7|ATP6V0D1|SLC12A6|ABCB6|BCAP31|ATP6AP2|SLC9A6|AFG3L2|IMMT|WDTC1|PACS2|DMXL2|SLC9A8|ATP13A2|SLC39A14|SLC39A6|NPTN|ATP2C…	-2.37731e+16	11.0	0.0	0.0
1	1	1	1	1	-744305030775461	-3690147611561380	-9496967124467500	-5805395297582900	-1.53008e+16	GO:0006812	GO Biological Processes	monoatomic cation transport	19_GO:0051179 localization	-2.63011e+16	3.37993e+16	1.34395e+16	ABCB7|ANK2|ATP1A3|ATP2A2|ATP2B1|ATP2B2|ATP2B3|ATP5F1B|ATP6V1A|ATP6V0C|ATP6V0A1|ATP6AP1|ATP7B|HCN2|CACNA1A|CHRNA4|CHRNB2|CLTC|COX15|CP|FXN|FTL|GPM6A|GRIN1|ITPR1|KCNA2|KCNC3|KCND1|KCND2|KCND3|KCNJ10|KCNJ11|KCNQ2|KCNQ3|ATP6|SLC11A2|PSEN1|PSEN2|SCN1A|SCN2A|SCN8A|SLC6A1|SLC6A3|SLC6A8|SLC8A2|SLC8A3|SNAP25|ABCC8|SURF1|UQCRC1|SLC39A7|CACNA1I|CACNA1G|ATP6V0D1|SLC6A5|SLC33A1|CACNA2D2|PMPCB|SLC23A2|SLC12A6|…	-2333280232936230	11.0	0.0	0.0
1	1	1	0	1	-2098175807356710	-676294444982051	-1.64629e+16	0.0	-9007982736849710	GO:0007612	GO Biological Processes	learning	19_GO:0032501 multicellular organismal process	-2592717763167740	7602815485168420	1.62344e+16	APP|CHRNB2|CLN3|DLG4|CLN8|GRIN1|HTT|MAP1A|MECP2|NF1|NTRK2|PPT1|LGMN|RELN|ATXN1|SLC6A1|SLC8A2|SLC8A3|SNAP25|ABCC8|TH|TNR|UBE3A|AAAS|SYNGAP1|SYNJ1|NRXN1|NRXN2|CIC|SYT11|PLCB1|DDHD2|MAPK8IP2|NPTN|GIT1|GPR88|PAK6|PAK5|JPH3|SLC12A5|CSMD1|PPP1R1B|JPH4|SHANK3	-2297655967491300	1.0	0.0	0.0
1	1	1	1	1	-9928588920002070	-4900891129489410	-6876019870456450	-2155319679598390	-9694781727322410	GO:0007626	GO Biological Processes	locomotory behavior	19_GO:0032501 multicellular organismal process	-2.58622e+16	6643159404697860	1.56749e+16	ABCA2|ADCY5|APBA1|APP|ASTN1|CHRNB2|CNTN1|CSTB|DAB1|DLG4|CLN8|FGF12|FXN|GLRA1|GLRB|HEXA|HEXB|HPRT1|KCND2|KCNJ10|MECP2|NPC1|PAFAH1B1|PPT1|RELN|SCN1A|SLC6A3|SNAP25|TH|NKX2-1|TNR|UBE3A|UCHL1|PUM1|FIG4|VPS13A|DDHD2|ABHD12|GIT1|CRBN|GPR88|CLN6|PAK6|PAK5|SLC4A10|SPG11|PPP1R1B|SLC25A46|LRRTM1	-2292862688747640	12.0	1.0	1.0
1	1	1	1	1	-7755880312623430	-2537836698920760	-8875714584752560	-4225960251906640	-1.36374e+16	GO:0098655	GO Biological Processes	monoatomic cation transmembrane transport	19_GO:0051179 localization	-2.57009e+16	3632573533336890	1.35056e+16	ABCB7|ATP1A3|ATP2A2|ATP2B1|ATP2B2|ATP2B3|ATP5F1B|ATP6V1A|ATP6V0C|ATP6V0A1|ATP6AP1|ATP7B|HCN2|CACNA1A|COX15|FXN|GPM6A|GRIN1|ITPR1|KCNA2|KCNC3|KCND1|KCND2|KCND3|KCNJ10|KCNJ11|KCNQ2|KCNQ3|ATP6|SLC11A2|PSEN1|SCN1A|SCN2A|SCN8A|SLC6A1|SLC6A3|SLC6A8|SLC8A2|SLC8A3|SNAP25|ABCC8|SURF1|UQCRC1|SLC39A7|CACNA1I|CACNA1G|ATP6V0D1|SLC6A5|SLC33A1|CACNA2D2|PMPCB|SLC12A6|ABCB6|ATP6AP2|SLC9A6|AFG3L2|ABCB8|PLCB1|SLC9A…	-2.27837e+16	11.0	0.0	0.0
1	1	0	1	1	-5945741650217020	-3074676159371950	0.0	-1.00473e+16	-2.34941e+16	GO:0030003	GO Biological Processes	intracellular monoatomic cation homeostasis	19_GO:0042592 homeostatic process	-2.55225e+16	4491733994161170	1.41491e+16	ABCB7|ANK2|APP|ATP1A3|ATP2A2|ATP2B1|ATP2B2|ATP2B3|ATP5F1B|ATP6V1A|ATP6V0C|ATP6V0A1|ATP6AP1|ATP7B|CALR|CLN3|CLN5|CP|FXN|FTL|GRN|GRIK2|HEXB|ITPR1|SLC11A2|PPT1|PRNP|PSEN1|RAP1GDS1|SLC8A2|SLC8A3|TMBIM6|HSP90B1|UBE3A|WFS1|XK|RAB7A|SLC39A7|ATP6V0D1|ABCB6|BCAP31|ATP6AP2|SLC9A6|AFG3L2|IMMT|PACS2|DMXL2|SLC9A8|ATP13A2|SLC39A14|SLC39A6|NPTN|ATP2C1|CCDC22|ATP6V1D|ATP6V1H|TMCO1|CLN6|SLC30A10|CCDC47|SLC4A10|SL…	-2.26211e+16	11.0	0.0	0.0
1	1	0	1	1	-5751771702015240	-3009379183347440	0.0	-8594319230281940	-2494562571327270	GO:0050801	GO Biological Processes	monoatomic ion homeostasis	19_GO:0042592 homeostatic process	-2542258121313810	4104140818858560	1.38208e+16	ABCB7|ANK2|APP|ATP1A3|ATP2A2|ATP2B1|ATP2B2|ATP2B3|ATP5F1B|ATP6V1A|ATP6V0C|ATP6V0A1|ATP6AP1|ATP7B|CALR|CLN3|CLN5|CP|EXT2|FECH|FXN|FTL|GRN|GRIK2|GRIN1|HEXB|ITPR1|KCNJ10|SLC11A2|OTC|PPT1|PRNP|PSEN1|RAP1GDS1|SLC8A2|SLC8A3|TMBIM6|HSP90B1|UBE3A|WFS1|XK|RAB7A|SLC39A7|ATP6V0D1|SLC12A6|ABCB6|BCAP31|ATP6AP2|SLC9A6|AFG3L2|IMMT|PACS2|DMXL2|SLC9A8|ATP13A2|SLC39A14|SLC39A6|NPTN|ATP2C1|CCDC22|ATP6V1D|ATP6V1H|TM…	-2253642124560060	11.0	0.0	0.0
1	1	0	1	1	-5360100928123660	-3080806715992140	0.0	-8750856858234210	-2.52728e+16	GO:0055080	GO Biological Processes	monoatomic cation homeostasis	19_GO:0042592 homeostatic process	-2.5302e+16	4134190911968680	1.38109e+16	ABCB7|ANK2|APP|ATP1A3|ATP2A2|ATP2B1|ATP2B2|ATP2B3|ATP5F1B|ATP6V1A|ATP6V0C|ATP6V0A1|ATP6AP1|ATP7B|CALR|CLN3|CLN5|CP|EXT2|FECH|FXN|FTL|GRN|GRIK2|GRIN1|HEXB|ITPR1|KCNJ10|SLC11A2|PPT1|PRNP|PSEN1|RAP1GDS1|SLC8A2|SLC8A3|TMBIM6|HSP90B1|UBE3A|WFS1|XK|RAB7A|SLC39A7|ATP6V0D1|SLC12A6|ABCB6|BCAP31|ATP6AP2|SLC9A6|AFG3L2|IMMT|PACS2|DMXL2|SLC9A8|ATP13A2|SLC39A14|SLC39A6|NPTN|ATP2C1|CCDC22|ATP6V1D|ATP6V1H|TMCO1|…	-224305586407821	11.0	0.0	0.0
1	1	1	0	1	-4.12964e+16	-3958681175315820	-1.52393e+16	0.0	-1.10598e+16	GO:0031175	GO Biological Processes	neuron projection development	19_GO:0032502 developmental process	-2.49833e+16	3551247260202480	1.32408e+16	APLP1|APLP2|APP|RERE|DDR1|CDH4|CHRNB2|CNTN1|CTNNA2|DAB1|DLG4|TOR1A|CELSR2|MEGF8|PTK2B|FOXG1|FOLR1|GAP43|GFAP|GPM6A|GPM6B|ARHGAP35|GSK3B|HPRT1|KIF5A|L1CAM|MAG|MAP1A|MAP1B|MAPT|MECP2|NCAM1|SLC11A2|NRCAM|OPHN1|PAFAH1B1|PLP1|RELN|PSD|RAB6A|SH3GL2|SLIT1|STXBP1|NKX2-1|TNR|UCHL1|VLDLR|USP9X|CUL4B|KLF7|SYNGAP1|BRSK2|NRXN1|FEZ2|RAPGEF2|SLC9A6|SEMA6B|AFG3L2|SLITRK3|NMNAT2|SPART|NFASC|NCDN|MAPK8IP3|ZDHHC17|…	-2.21261e+16	13.0	1.0	1.0
1	1	0	1	1	-578044458589036	-2.99612e+16	0.0	-9856194203296170	-2.31461e+16	GO:0006873	GO Biological Processes	intracellular monoatomic ion homeostasis	19_GO:0042592 homeostatic process	-2488194238213050	4.38529e+16	1388555647483220	ABCB7|ANK2|APP|ATP1A3|ATP2A2|ATP2B1|ATP2B2|ATP2B3|ATP5F1B|ATP6V1A|ATP6V0C|ATP6V0A1|ATP6AP1|ATP7B|CALR|CLN3|CLN5|CP|FXN|FTL|GRN|GRIK2|HEXB|ITPR1|SLC11A2|PPT1|PRNP|PSEN1|RAP1GDS1|SLC8A2|SLC8A3|TMBIM6|HSP90B1|UBE3A|WFS1|XK|RAB7A|SLC39A7|ATP6V0D1|ABCB6|BCAP31|ATP6AP2|SLC9A6|AFG3L2|IMMT|PACS2|DMXL2|SLC9A8|ATP13A2|SLC39A14|SLC39A6|NPTN|ATP2C1|CCDC22|ATP6V1D|ATP6V1H|TMCO1|CLN6|SLC30A10|CCDC47|SLC4A10|SL…	-2203853439501400	11.0	0.0	0.0
0	1	1	1	1	0.0	-6055282295753590	-1.44337e+16	-7.37534e+16	-944899830002094	GO:0099504	GO Biological Processes	synaptic vesicle cycle	19_GO:0051179 localization	-2.44074e+16	7687372910777160	1.57812e+16	ATP6V1A|ATP6V0A1|ATP6AP1|CANX|CDH2|DDC|DNM1|OPHN1|SEPTIN5|PSEN1|SH3GL2|SNAP25|STXBP1|SYN1|TH|PPFIA3|CADPS|SYNJ1|BSN|AP3D1|ATP6V0D1|RIMS2|SNPH|RIMS3|DNAJC6|SNAP91|ATP6AP2|CPLX2|CPLX1|RIMS1|UNC13A|SYT11|PIP5K1C|GIT1|ATP6V1D|ATP6V1H|TBC1D24|DNAJC5|BLTP1|STX1B|RIMS4	-2.15774e+16	4.0	0.0	0.0
1	1	0	1	1	-1.00165e+16	-3.07543e+16	0.0	-1.03405e+16	-1.16732e+16	R-HSA-382551	Reactome Gene Sets	Transport of small molecules		-2.41934e+16	3.37726e+16	1.28734e+16	ABCA2|ABCA3|ABCB7|ADCY5|ADD1|ADD2|AP2A1|ABCD1|ATP1A3|ATP2A2|ATP2B1|ATP2B2|ATP2B3|ATP6V1A|ATP6V0C|ATP6V0A1|ATP6AP1|ATP7B|CALM1|CLCN2|CLCN4|CLCN6|CLCN7|CLTC|CP|DMTN|FTL|KCNJ11|LIPA|MTTP|NPC1|SLC11A2|PHB1|PSMA7|PSMC4|PSMC5|PSMC6|PSMD1|PSMD2|PSMD3|SEL1L|SLC2A1|SLC6A1|SLC6A3|SLC8A2|SLC8A3|SLC16A2|SPG7|VCP|VDAC2|VLDLR|SLC39A7|PEX3|ATP6V0D1|SLC6A5|SLC33A1|PSMF1|PMPCB|ABCG1|PSMD6|SLC12A6|ABCB6|ATP9A|PSME…	-2137956188463600	11.0	0.0	0.0
1	1	0	1	1	-1.41445e+16	-3.99901e+16	0.0	-9454275633113380	-801550954275044	GO:0033365	GO Biological Processes	protein localization to organelle	19_GO:0051179 localization	-2418405180572220	3349169698226300	1.2846e+16	PARP1|ANK2|ARL1|ATR|BCS1L|CALR|SCARB2|TPP1|CPE|CSE1L|DDX1|TIMM8A|DLG4|TOR1A|GRIK5|KPNA1|LAMP1|LAMP2|LMNB1|NF1|PEX6|PEX7|PEX10|PIK3R1|PEX2|RAB6A|RANGAP1|RAP1GDS1|SORT1|SEC13|SRP54|SRPRA|XRCC4|RAB7A|NUP214|STAM|USP9X|PEX3|TNKS|GBF1|GPAA1|SQSTM1|AP3D1|AIFM1|ZW10|PMPCB|NUP155|EMC2|POM121|BCAP31|TMEM147|PIBF1|PITRM1|RER1|PMPCA|VPS13A|SYNE1|ATP13A2|NOMO1|SAMM50|PTPN23|VPS41|CHMP4A|SCG3|TNPO2|PIK3R4|IPO…	-2137956188463600	7.0	0.0	0.0
1	1	1	1	1	-642092794324171	-2.64143e+16	-8361514715293590	-3.85415e+16	-1.39807e+16	GO:0098662	GO Biological Processes	inorganic cation transmembrane transport	19_GO:0051179 localization	-2407903490972250	3574822975766370	1.30122e+16	ABCB7|ATP1A3|ATP2A2|ATP2B1|ATP2B2|ATP2B3|ATP5F1B|ATP6V1A|ATP6V0C|ATP6V0A1|ATP6AP1|ATP7B|HCN2|CACNA1A|COX15|FXN|GPM6A|GRIN1|ITPR1|KCNA2|KCNC3|KCND1|KCND2|KCND3|KCNJ10|KCNJ11|KCNQ2|KCNQ3|ATP6|SLC11A2|PSEN1|SCN1A|SCN2A|SCN8A|SLC6A1|SLC6A3|SLC6A8|SLC8A2|SLC8A3|SNAP25|ABCC8|SURF1|UQCRC1|SLC39A7|CACNA1I|CACNA1G|ATP6V0D1|SLC6A5|SLC33A1|CACNA2D2|PMPCB|SLC12A6|ABCB6|ATP6AP2|SLC9A6|AFG3L2|ABCB8|PLCB1|SLC9A…	-2.12868e+16	11.0	0.0	0.0
1	1	0	1	1	-9567294465818670	-6562506761122770	0.0	-1.30565e+16	-7144815559232380	GO:0051603	GO Biological Processes	proteolysis involved in protein catabolic process	19_GO:0008152 metabolic process	-2.40457e+16	3538499193114570	1.29721e+16	AMFR|ARRB1|CALR|CANX|CTSB|DDB1|TOR1A|GBA1|GSK3B|ATXN3|PEX10|DNAJC3|LGMN|PSMA7|PSMC4|PSMC5|PSMC6|PSMD1|PSMD2|PSMD3|SEL1L|TAF1|HSP90B1|UBA1|UBE2A|UBE3A|UCHL1|VCP|WFS1|STAM|USP5|USP9X|BAP1|CUL4B|CUL3|CUL2|CDC23|CTSF|SQSTM1|NAE1|BRSK2|UBE4A|LONP1|PSMF1|PSMD6|PJA2|STUB1|APC2|ZER1|USP20|MAN1B1|RNF13|ECPAS|ANAPC13|PTPN23|RNF167|TRPC4AP|CHMP4A|UBQLN2|UBQLN1|CRBN|CHMP5|TOLLIP|RNF216|RNF130|UGGT1|CCDC47|RN…	-2.12653e+16	3.0	0.0	0.0
1	1	1	0	1	-4470966708236410	-6894383265491390	-1.92883e+16	0.0	-9487990232777600	GO:0042391	GO Biological Processes	regulation of membrane potential	19_GO:0065007 biological regulation	-2.39591e+16	4234769806852180	1.35053e+16	PARP1|ABCD1|ANK2|APP|ATP1A3|ATP2A2|HCN2|CALM1|CHRNA4|CHRNB2|CLN3|DLD|DLG4|PTK2B|FGF12|MTOR|GABRA3|GBA1|GLRA1|GLRB|GRIA2|GRIA3|GRID2|GRIK2|GRIK5|GRIN1|GSK3B|KCNA2|KCND2|KCND3|KCNJ10|KCNJ11|KCNQ3|LIPA|MAPT|MECP2|MPP2|NDUFS1|NRCAM|NTRK2|RELN|PSEN1|SCN1A|SLC8A2|SLC8A3|VCP|CACNA1I|CACNA1G|NRXN1|NUP155|RIMS2|RIMS3|ARL6IP5|RIMS1|SPART|CUX2|CRTC1|MAPK8IP2|CTNNA3|GPR88|SCN3B|KCNK12|CELF4|TBC1D24|PANK2|SHA…	-2119029045491840	14.0	1.0	1.0
1	1	0	1	1	-1.11628e+16	-2623649167949070	0.0	-1.55941e+16	-1.54976e+16	GO:0007033	GO Biological Processes	vacuole organization	19_GO:0009987 cellular process	-2.38887e+16	6503234733181250	1496735217509690	ATP2A2|ATP6V1A|ATP6V0C|ATP6V0A1|ATP6AP1|TPP1|CLN3|CLN5|CTSD|CLN8|MTOR|B4GALNT1|GBA1|GRN|HEXA|HEXB|LIPA|PPT1|PSEN1|RAB1A|RAB7A|ATG13|FIG4|WASHC5|ATP6AP2|WDR45|PACS2|ATP13A2|ZFYVE26|STX12|CHMP4A|UBQLN2|UBQLN1|ATP6V1D|CHMP5|ATP6V1H|CLN6|ATG2B|ARL8B|VPS35|VPS11|AKTIP|VPS16|SPG11|SPNS1|MFSD8	-2.11312e+16	2.0	0.0	0.0
1	1	1	0	1	-2.07195e+16	-3579363024285110	-1656271962522670	0.0	-1.14172e+16	GO:0120035	GO Biological Processes	regulation of plasma membrane bounded cell projection organization	19_GO:0050789 regulation of biological process	-2.35631e+16	3514045459949630	1.28168e+16	KIF1A|DDR1|CAPZB|SCARB2|CDH2|CDH4|CHRNB2|CLN3|CNTN1|CRMP1|CTNNA2|DAB1|DLG4|DPYSL3|MEGF8|DMTN|PTK2B|MTOR|GAP43|GDI1|GFAP|GPM6A|RAPGEF1|GRID2|GRN|ARHGAP35|GSK3B|HTT|L1CAM|MAG|MAP1B|MAPT|NRCAM|NRDC|NTRK2|PAFAH1B1|PALM|SERPINI1|PIK3R1|PRNP|RELN|PSEN1|PTPRD|RIT2|SLIT1|SNAP25|CDKL5|THY1|TNR|UBE3A|VLDLR|XK|FXR1|SYNGAP1|BRSK2|NEURL1|MAP3K13|RAPGEF2|FIG4|ACTR3|SEMA6B|RUFY3|SETX|HECW1|SPART|CUX2|CRTC1|FAM9…	-2081662826400620	15.0	1.0	1.0
1	1	1	1	1	-8788096426521380	-3933069871813820	-5353731821840280	-104502245966976	-5395896116707590	GO:0051640	GO Biological Processes	organelle localization	19_GO:0051179 localization	-2320513235057550	3.83438e+16	1.29771e+16	ATM|ATP2A2|KIF1A|CALM1|CDH2|CLN3|DAB1|DNM1|DYNC1H1|TOR1A|MTOR|HTT|KIF5A|LMNB1|MAP1B|MAPT|MLH1|OPA1|PAFAH1B1|SEPTIN5|PSEN1|PSEN2|RAB1A|RAB6A|SLIT1|SNAP25|STXBP1|SYN1|UCHL1|RAB7A|STX7|CUL3|PPFIA3|USO1|CDC23|GBF1|SYNJ1|BSN|AP3D1|ZW10|SNPH|SNAP91|ACTR3|LRPPRC|PIBF1|KIF1C|CPLX2|COPS5|RNF13|COPG1|KIFAP3|UNC13A|SYT11|EXOC6B|PACS2|STX12|FAM98A|RNF167|TMEM230|CHMP4A|CHMP5|SDAD1|MSTO1|ARL8B|SYBU|EXOC1|TBC1…	-2.04694e+16	16.0	1.0	1.0
0	1	1	0	1	0.0	-3.87376e+16	-1929093981703490	0.0	-9156955432146150	GO:0050808	GO Biological Processes	synapse organization	19_GO:0009987 cellular process	-2.30233e+16	4784621819897890	1.36221e+16	ACTB|ADAM10|ADD2|APP|CDH2|CDH10|DLG4|GLRB|GPM6A|GRID2|L1CAM|MAP1B|MAPT|MECP2|NRCAM|OPHN1|PALM|PRNP|LGMN|RELN|PSEN1|PTPRD|SORT1|SLC6A1|SLC8A2|SLC8A3|SPTB|SPTBN2|SYN1|TNR|GNPAT|PPFIA4|PPFIA3|SYNGAP1|BSN|INA|NRXN1|NRXN2|CLSTN3|AFG3L2|RER1|SLITRK3|UNC13A|ERC1|ADGRL3|SEZ6L|SEZ6L2|NPTN|SYBU|DLGAP3|SPG11|SRCIN1|ARHGAP39|PRRT1|IGSF21|SHANK3|SLC25A46|DNER|LRRTM1	-2.0298e+16	17.0	1.0	1.0
1	1	0	1	1	-1.68435e+16	-7066302423204200	0.0	-1.42777e+16	-4618138242609510	GO:0090407	GO Biological Processes	organophosphate biosynthetic process	19_GO:0008152 metabolic process	-2.29842e+16	3.76276e+16	1285644174589630	ACAT1|ACLY|ADCY5|ATIC|ATM|ATP5F1B|ATP6V1A|ATP6V0C|CKMT1B|CLN3|DGKB|DLAT|DLD|GARS1|GART|GCDH|GCH1|HEXB|HPRT1|LIPA|ATP6|MTHFD1|ND6|MMUT|MVK|NDUFA10|NDUFS1|NDUFS2|NDUFS3|NDUFV1|NDUFS4|NDUFS8|PNP|PDHA1|PDHB|PIGA|PIK3R1|PIK3R2|PPT1|PRPS1|SDHA|ELOVL4|TKT|PDHX|PLA2G6|GNPAT|PDXK|GPAA1|CDS2|SYNJ1|NFS1|PITPNM1|IP6K1|FIG4|CEPT1|SPTLC1|NMNAT2|PIP5K1C|PIK3R4|RRM2B|PIGT|VAC14|SERINC1|ELOVL5|SRD5A3|PIP4K2C|DHDD…	-2.02692e+16	18.0	1.0	1.0
0	1	1	0	1	0.0	-3.4794e+16	-1628496228408910	0.0	-1.11824e+16	GO:0031344	GO Biological Processes	regulation of cell projection organization	19_GO:0050789 regulation of biological process	-2287963952865810	3.43442e+16	1.25571e+16	KIF1A|DDR1|CAPZB|SCARB2|CDH2|CDH4|CHRNB2|CLN3|CNTN1|CRMP1|CTNNA2|DAB1|DLG4|DPYSL3|MEGF8|DMTN|PTK2B|MTOR|GAP43|GDI1|GFAP|GPM6A|RAPGEF1|GRID2|GRN|ARHGAP35|GSK3B|HTT|L1CAM|MAG|MAP1B|MAPT|NRCAM|NRDC|NTRK2|PAFAH1B1|PALM|SERPINI1|PIK3R1|PRNP|RELN|PSEN1|PTPRD|RIT2|SLIT1|SNAP25|CDKL5|THY1|TNR|UBE3A|VLDLR|XK|FXR1|SYNGAP1|BRSK2|NEURL1|MAP3K13|RAPGEF2|FIG4|ACTR3|SEMA6B|RUFY3|SETX|HECW1|SPART|CUX2|CRTC1|FAM9…	-2.01745e+16	15.0	0.0	0.0
1	1	1	0	1	-2.8888e+16	-3.94291e+16	-1.48082e+16	0.0	-1.0022e+16	GO:0010975	GO Biological Processes	regulation of neuron projection development	19_GO:0032502 developmental process	-2238825490829050	4035746333312700	1289329202737790	KIF1A|DDR1|SCARB2|CDH2|CDH4|CHRNB2|CNTN1|CRMP1|CTNNA2|DAB1|DLG4|DPYSL3|MEGF8|PTK2B|GDI1|GFAP|RAPGEF1|GRID2|GRN|ARHGAP35|GSK3B|L1CAM|MAG|MAP1B|MAPT|NRCAM|NRDC|NTRK2|PAFAH1B1|SERPINI1|RELN|PSEN1|PTPRD|RIT2|SLIT1|SNAP25|CDKL5|THY1|TNR|UBE3A|VLDLR|XK|SYNGAP1|BRSK2|MAP3K13|RAPGEF2|FIG4|SEMA6B|RUFY3|SETX|HECW1|SPART|CUX2|CRTC1|NPTN|TMEM30A|CAMK1D|RTN4|TBC1D24|KIDINS220|SRCIN1|RTN4IP1|SHANK3|KNDC1|STX1B…	-1969290945662940	15.0	0.0	0.0
1	0	0	1	0	-2.23485e+16	0.0	0.0	-7055842214478490	0.0	GO:0007005	GO Biological Processes	mitochondrion organization	19_GO:0009987 cellular process	-2.23485e+16	6586236933797900	1.46563e+16	PARP1|BCS1L|COX10|FXN|HSPA9|MPV17|NDUFA10|NDUFS1|NDUFS2|NDUFS3|NDUFS4|NDUFS8|OPA1|SPG7|SURF1|SQSTM1|AIFM1|LONP1|PMPCB|PITRM1|AFG3L2|IMMT|PMPCA|DDHD2|SAMM50|ACAD9|RRM2B|TTC19|MSTO1|VPS13D|ATAD3A|FOXRED1|TWNK|TMEM135|PTCD2|PANK2|NUBPL|SLC25A46|NDUFAF2|COX20|WDR81|DNAJC19|NDUFAF6|NDUFS7	-191460849183538	19.0	1.0	1.0
1	1	0	1	1	-1.63984e+16	-2.77822e+16	0.0	-972565558077416	-1.14886e+16	R-HSA-446203	Reactome Gene Sets	Asparagine N-linked glycosylation		-2.22673e+16	4869985277880010	1.34462e+16	AMFR|ANK2|CALR|CANX|CAPZB|COPA|COPB1|DYNC1H1|DPAGT1|FOLR1|GFPT1|GLB1|PDIA3|STT3A|MAN2A2|NEU1|PMM2|CTSA|RAB1A|RPN2|SEC13|SEL1L|SPTB|SPTBN1|SPTBN2|TUBB2A|VCP|USO1|GBF1|NAPG|COPB2|GOSR2|SEC24C|TUBB4A|COG5|MAN1B1|COPG1|PPP6R1|GANAB|SLC17A5|ALG6|ST8SIA3|SAR1B|DYNC1LI1|PPP6R3|ACTR10|CMAS|ALG1|UGGT1|ALG8|SRD5A3|DHDDS|TRAPPC9|SYVN1|NUS1|MIA3	-1.95815e+16	10.0	0.0	0.0
1	1	0	1	1	-926003152396564	-5113052765457430	0.0	-1.23396e+16	-582323562902814	GO:0043632	GO Biological Processes	modification-dependent macromolecule catabolic process	19_GO:0008152 metabolic process	-2145071103596700	3.48669e+16	1218816927361820	AMFR|ARRB1|CALR|CANX|DDB1|GBA1|GSK3B|ATXN3|PEX10|PSMA7|PSMC4|PSMC5|PSMC6|PSMD1|PSMD2|PSMD3|SEL1L|TAF1|HSP90B1|UBA1|UBE2A|UBE3A|UCHL1|VCP|WFS1|STAM|USP5|USP9X|BAP1|CUL4B|CUL3|CUL2|CDC23|SQSTM1|NAE1|UBE4A|LONP1|PSMF1|PSMD6|PJA2|STUB1|APC2|USP20|MAN1B1|RNF13|ECPAS|ANAPC13|PTPN23|RNF167|TRPC4AP|CHMP4A|UBQLN2|UBQLN1|EXOSC3|CRBN|CHMP5|TOLLIP|RNF216|RNF130|CCDC47|RNF150|ANAPC1|KCTD17|FBXL18|DCAF11|NDFIP…	-1877425092846630	3.0	0.0	0.0
1	1	0	1	1	-8867545545704050	-522269185423135	0.0	-1.25522e+16	-5952527789612810	GO:0019941	GO Biological Processes	modification-dependent protein catabolic process	19_GO:0008152 metabolic process	-2.13863e+16	3512931702028800	1.21903e+16	AMFR|ARRB1|CALR|CANX|DDB1|GBA1|GSK3B|ATXN3|PEX10|PSMA7|PSMC4|PSMC5|PSMC6|PSMD1|PSMD2|PSMD3|SEL1L|TAF1|HSP90B1|UBA1|UBE2A|UBE3A|UCHL1|VCP|WFS1|STAM|USP5|USP9X|BAP1|CUL4B|CUL3|CUL2|CDC23|SQSTM1|NAE1|UBE4A|LONP1|PSMF1|PSMD6|PJA2|STUB1|APC2|USP20|MAN1B1|RNF13|ECPAS|ANAPC13|PTPN23|RNF167|TRPC4AP|CHMP4A|UBQLN2|UBQLN1|CRBN|CHMP5|TOLLIP|RNF216|RNF130|CCDC47|RNF150|ANAPC1|KCTD17|FBXL18|DCAF11|NDFIP1|USP48…	-1.87201e+16	3.0	0.0	0.0
1	0	0	1	1	-1.02062e+16	0.0	0.0	-1.35297e+16	-572487988396497	GO:0016050	GO Biological Processes	vesicle organization	19_GO:0009987 cellular process	-213784474293068	4523155310765930	1.29342e+16	AP1B1|ATP6V1A|ATP6V0C|ATP6V0A1|ATP6AP1|LYST|CLN3|DLG4|DNM1|PAFAH1B1|PTPRN|RAB1A|SORT1|SEC13|SNAP25|STXBP1|VAMP1|RAB7A|STAM|STX7|CUL3|USO1|GBF1|SQSTM1|AP3D1|ATP6V0D1|GOSR2|SEC24C|SNAP91|WASHC5|ABCB6|ATP6AP2|SEC23B|SCAP|UNC13A|SYT11|SLC9A8|DNAJC13|ATP13A2|STX12|VPS41|CHMP4A|SAR1B|ATP6V1D|ANKFY1|CHMP5|ATP6V1H|ARL8B|VPS11|TRAPPC11|AKTIP|VPS16|SPG11|TRAPPC9|STX1B|VPS13B|MIA3|SNX19	-1.87201e+16	5.0	0.0	0.0
0	1	1	0	1	0.0	-3.69783e+16	-1.78814e+16	0.0	-999339679442201	R-HSA-112316	Reactome Gene Sets	Neuronal System		-2.13246e+16	4126761043834210	1.26389e+16	ADCY5|AP2A1|ALDH2|APBA1|HCN2|CACNA1A|CALM1|CHRNA4|CHRNB2|COMT|DLG4|GABRA3|GLRA1|GLRB|GNAL|GRIA2|GRIA3|GRIK2|GRIK5|GRIN1|KCNA2|KCNC3|KCND1|KCND2|KCND3|KCNJ10|KCNJ11|KCNQ2|KCNQ3|MAPT|PDPK1|PRKCG|PTPRD|RPS6KA3|SLC6A1|SLC6A3|SNAP25|STXBP1|ABCC8|SYN1|TSPAN7|TUBB2A|ALDH5A1|PPFIA4|PPFIA3|CACNA2D2|NRXN1|NRXN2|RTN3|TUBB4A|ARL6IP5|CAMKK2|CPLX1|DLGAP4|SLITRK3|RIMS1|PLCB1|NPTN|GIT1|DLGAP3|CACNG8|LRRTM4|DNAJC…	-1867500003049930	20.0	1.0	1.0
1	1	0	1	1	-8442824569843570	-5316328633108680	0.0	-1.27335e+16	-6062983339424900	GO:0006511	GO Biological Processes	ubiquitin-dependent protein catabolic process	19_GO:0008152 metabolic process	-2.1231e+16	3.528e+16	1.21564e+16	AMFR|ARRB1|CALR|CANX|DDB1|GBA1|GSK3B|ATXN3|PEX10|PSMA7|PSMC4|PSMC5|PSMC6|PSMD1|PSMD2|PSMD3|SEL1L|TAF1|HSP90B1|UBA1|UBE2A|UBE3A|UCHL1|VCP|WFS1|STAM|USP5|USP9X|BAP1|CUL4B|CUL3|CUL2|CDC23|SQSTM1|NAE1|UBE4A|PSMF1|PSMD6|PJA2|STUB1|APC2|USP20|MAN1B1|RNF13|ECPAS|ANAPC13|PTPN23|RNF167|TRPC4AP|CHMP4A|UBQLN2|UBQLN1|CRBN|CHMP5|TOLLIP|RNF216|RNF130|CCDC47|RNF150|ANAPC1|KCTD17|FBXL18|DCAF11|NDFIP1|USP48|SYVN1…	-1.859e+16	3.0	0.0	0.0
1	1	1	1	1	-402220550420155	-4193684983945960	-1.06494e+16	-2.42521e+16	-1.3944e+16	GO:0030001	GO Biological Processes	metal ion transport	19_GO:0051179 localization	-2.09254e+16	3.35643e+16	1.19276e+16	ABCB7|ANK2|ATP1A3|ATP2A2|ATP2B1|ATP2B2|ATP2B3|ATP7B|HCN2|CACNA1A|CHRNA4|CHRNB2|CLTC|CP|FXN|FTL|GPM6A|GRIN1|ITPR1|KCNA2|KCNC3|KCND1|KCND2|KCND3|KCNJ10|KCNJ11|KCNQ2|KCNQ3|SLC11A2|PSEN1|PSEN2|SCN1A|SCN2A|SCN8A|SLC6A1|SLC6A3|SLC6A8|SLC8A2|SLC8A3|SNAP25|ABCC8|SLC39A7|CACNA1I|CACNA1G|SLC6A5|CACNA2D2|PMPCB|SLC23A2|SLC12A6|ABCB6|SLC9A6|AFG3L2|ABCB8|PLCB1|SLC9A8|SLC39A14|SLC39A6|TRPC4AP|ATP2C1|GHITM|SARAF…	-1829285466927160	11.0	0.0	0.0
1	1	0	1	1	-1092266811736620	-4.00675e+16	0.0	-8625128678613470	-1.21757e+16	GO:0006914	GO Biological Processes	autophagy	19_GO:0008152 metabolic process	-2.07978e+16	4630695737383630	1.28227e+16	ATM|ATP2A2|CALM1|CALR|CLN3|CLTC|CTSD|MTOR|GBA1|LAMP2|NPC1|PSEN1|PEX2|RAB1A|TMBIM6|VCP|RAB7A|STAM|SQSTM1|TMEM59|RUBCN|ATG13|TBC1D5|TECPR2|STUB1|WDR45|WDFY3|SYT11|VPS13A|PACS2|UFL1|ATP13A2|ZFYVE26|STX12|VPS41|CHMP4A|TMEM208|UBQLN2|UBQLN1|PIK3R4|CHMP5|TOLLIP|ATG2B|ARL8B|VPS11|SNX14|VPS16|TBC1D17|SPG11|C19orf12|SLC25A46|WDR81|C9orf72|MFSD8|NHLRC1	-1.81817e+16	21.0	1.0	1.0
1	1	0	1	1	-1092266811736620	-4.00675e+16	0.0	-8625128678613470	-1.21757e+16	GO:0061919	GO Biological Processes	process utilizing autophagic mechanism	19_GO:0009987 cellular process	-2.07978e+16	4630695737383630	1.28227e+16	ATM|ATP2A2|CALM1|CALR|CLN3|CLTC|CTSD|MTOR|GBA1|LAMP2|NPC1|PSEN1|PEX2|RAB1A|TMBIM6|VCP|RAB7A|STAM|SQSTM1|TMEM59|RUBCN|ATG13|TBC1D5|TECPR2|STUB1|WDR45|WDFY3|SYT11|VPS13A|PACS2|UFL1|ATP13A2|ZFYVE26|STX12|VPS41|CHMP4A|TMEM208|UBQLN2|UBQLN1|PIK3R4|CHMP5|TOLLIP|ATG2B|ARL8B|VPS11|SNX14|VPS16|TBC1D17|SPG11|C19orf12|SLC25A46|WDR81|C9orf72|MFSD8|NHLRC1	-1.81817e+16	21.0	0.0	0.0
1	1	1	1	1	-4517390077800160	-3.76869e+16	-1.83759e+16	-4.17586e+16	-5349564819029100	GO:0140352	GO Biological Processes	export from cell	19_GO:0051179 localization	-206374601631361	3.80873e+16	1219427115231350	ABCA3|AP1B1|APBA1|ATP1A3|ATP2B1|ATP2B3|ATP7B|BCR|CANX|CPE|DMTN|KCNA2|KCND3|MECP2|MTTP|NF1|NTRK2|PAFAH1B1|SEPTIN5|PPT1|PRF1|PSEN1|PTPRN|PTPRN2|RAB1A|SEL1L|SLC8A2|SLC16A2|SNAP25|STXBP1|SYN1|PPFIA3|CADPS|SYNJ1|BRSK2|NRXN1|NRXN2|RIMS2|SNPH|RIMS3|ARFGEF1|CPLX2|CPLX1|COPS5|HRH3|COPG1|RIMS1|UNC13A|SYT11|EXOC6B|PIP5K1C|ARL8B|SMPD3|SLC30A10|EXOC1|VPS11|TRAPPC11|TANGO6|DNAJC5|SRCIN1|SYT3|STX1B|RAB3C|TANGO2…	-1802926488719380	4.0	0.0	0.0
1	0	0	0	0	-2.04813e+16	0.0	0.0	0.0	0.0	WP4656	WikiPathways	Joubert syndrome		-2.04813e+16	1.86538e+16	1889486427809970	PARP1|ATM|MTOR|MRE11|NPHP1|OFD1|KIAA0586|PIBF1|RPGRIP1L|TCTN3|TMEM216|AHI1|MKS1|CC2D2A|CPLANE1|TMEM231|TCTN1|TCTN2|CEP290|TMEM67|ARL13B	-173879846847077	22.0	1.0	1.0
0	1	1	0	1	0.0	-3.94948e+16	-2.02468e+16	0.0	-7406244824094700	GO:0034330	GO Biological Processes	cell junction organization	19_GO:0009987 cellular process	-2.02468e+16	8828753877029730	1.50871e+16	ADD2|ANK2|BCR|DLG4|PTK2B|L1CAM|MAP1B|MAPT|PALM|SLC8A2|SLC8A3|SPTB|TNR|PPFIA4|PPFIA3|BSN|INA|NRXN1|NRXN2|SLITRK3|UNC13A|PIP5K1C|SEZ6L|SYBU|CAMSAP3|DLGAP3|CDH22|ARHGAP39|IGSF21|SHANK3|DNER|LRRTM1	-1717698655015570	17.0	0.0	0.0
1	1	1	1	1	-7504177282006230	-2421658165027490	-826788701530911	-2816524338238100	-6267612432284570	GO:0050905	GO Biological Processes	neuromuscular process	19_GO:0032501 multicellular organismal process	-2015307168154100	6840358941757540	1.38802e+16	AARS1|ADCY5|APP|BCR|TPP1|CLN3|CTNNA2|DLG4|CLN8|FGF12|FXN|MTOR|GBA1|GCH1|GLRA1|GLRB|GRID2|HEXA|HEXB|ITPR1|MAP1A|MECP2|PAFAH1B1|SCN1A|SLC6A3|TNR|UCHL1|XRCC1|NRXN1|SPART|BACE1|GPR88|RBFOX1|VPS35|JPH3|CSMD1|JPH4	-1.75527e+16	23.0	1.0	1.0
1	1	0	1	0	-1.46028e+16	-5995533584385330	0.0	-1.32118e+16	0.0	GO:0006520	GO Biological Processes	amino acid metabolic process	19_GO:0008152 metabolic process	-2003117459850180	479818579996516	1.26828e+16	AARS1|ACAT1|AMT|AUH|BCKDHB|DDC|DLD|ECHS1|EPRS1|GARS1|GART|GCDH|GFPT1|GLDC|GOT2|GSS|MECP2|ALDH6A1|MTHFD1|MMUT|NARS1|OTC|PCCA|PCCB|PTS|QDPR|RARS1|SLC16A2|TH|WARS1|ALDH5A1|PLOD3|FARSB|FARS2|SERINC3|ILVBL|HARS2|HIBCH|PYCR2|LARS1|DARS2|IARS2|MCCC1|VARS2|AARS2|FN3K|CARS2|NARS2|DGLUCY|TARS2|NAT8L	-1.74385e+16	24.0	1.0	1.0
1	0	0	1	1	-1.55868e+16	0.0	0.0	-1.04941e+16	-2.9892e+16	hsa05022	KEGG Pathway	Pathways of neurodegeneration - multiple diseases		-1978294185511960	372118322853617	1.18649e+16	APP|ATP2A2|ATP5F1B|CALM1|CAPN1|CSNK2B|DLG4|MTOR|GRIA2|GRIA3|GRIN1|GSK3B|HTT|ITPR1|KIF5A|MAPT|ATXN3|MAP3K10|ATP6|ND6|NDUFA10|NDUFS1|NDUFS2|NDUFS3|NDUFV1|NDUFS4|NDUFS8|PDYN|SEPTIN5|PRKCG|PRNP|PSEN1|PSEN2|PSMA7|PSMC4|PSMC5|PSMC6|PSMD1|PSMD2|PSMD3|RAB1A|ATXN1|ATXN2|SDHA|SLC6A3|SPTBN2|TUBB2A|UBA1|UCHL1|UQCRC1|UQCRC2|VCP|VDAC2|SQSTM1|ATG13|PSMD6|FIG4|TRAP1|APC2|TUBB4A|PLCB1|PIK3R4|ATG2B|ACTR10|SPG11|C9…	-1719781188324610	9.0	0.0	0.0
0	1	1	0	1	0.0	-5563970128024750	-1965453596222650	0.0	-3997580087772130	GO:0007269	GO Biological Processes	neurotransmitter secretion	19_GO:0051179 localization	-1965453596222650	2.88038e+16	2.14645e+16	SEPTIN5|PTPRN2|STXBP1|PPFIA3|CADPS|NRXN1|NRXN2|RIMS2|SNPH|RIMS3|CPLX2|CPLX1|HRH3|UNC13A|PIP5K1C|STX1B|RIMS4	-1.66862e+16	25.0	1.0	1.0
0	1	1	0	1	0.0	-5563970128024750	-1965453596222650	0.0	-3997580087772130	GO:0099643	GO Biological Processes	signal release from synapse	19_GO:0051179 localization	-1965453596222650	2.88038e+16	2.14645e+16	SEPTIN5|PTPRN2|STXBP1|PPFIA3|CADPS|NRXN1|NRXN2|RIMS2|SNPH|RIMS3|CPLX2|CPLX1|HRH3|UNC13A|PIP5K1C|STX1B|RIMS4	-1.66862e+16	25.0	0.0	0.0
1	1	0	1	1	-8653911123248520	-4066031459214510	0.0	-1087106655799650	-5964427539069210	GO:0010498	GO Biological Processes	proteasomal protein catabolic process	19_GO:0008152 metabolic process	-1934667169952520	4121907662230240	1.20126e+16	AMFR|ARRB1|CALR|CANX|DDB1|TOR1A|GBA1|GSK3B|ATXN3|PEX10|PSMA7|PSMC4|PSMC5|PSMC6|PSMD1|PSMD2|PSMD3|SEL1L|TAF1|HSP90B1|UBE2A|UCHL1|VCP|WFS1|CUL4B|CUL3|CUL2|CDC23|BRSK2|UBE4A|PSMF1|PSMD6|PJA2|STUB1|APC2|MAN1B1|ECPAS|ANAPC13|TRPC4AP|UBQLN2|UBQLN1|CRBN|RNF216|UGGT1|CCDC47|ANAPC1|KCTD17|FBXL18|DCAF11|HM13|SYVN1|TMEM67|FBXO44|AGAP3|UBR3|FBXL16|STT3B|NHLRC1	-1.6769e+16	3.0	0.0	0.0
1	1	1	0	1	-4456637397380240	-5131124199931440	-1.12481e+16	0.0	-6471542997540490	GO:0032989	GO Biological Processes	cellular component morphogenesis	19_GO:0032502 developmental process	-1.91314e+16	3.32124e+16	1.13578e+16	ABCA2|ANK2|APLP1|APLP2|APP|RERE|DDR1|CDH4|CHRNB2|CNTN1|CTNNA2|DAB1|DLG4|CELSR2|FOXG1|FLII|GAP43|GPM6A|ARHGAP35|HPRT1|KIF5A|L1CAM|MAG|MAP1A|MAP1B|NCAM1|SLC11A2|NRCAM|OPHN1|PAFAH1B1|RELN|SH3GL2|SLIT1|STXBP1|NKX2-1|TNR|UCHL1|VLDLR|USP9X|GNPAT|KLF7|SYNGAP1|BRSK2|NRXN1|FEZ2|FIG4|SLC9A6|SEMA6B|AFG3L2|TPPP|SLITRK3|SPART|NFASC|SLC9A8|ZDHHC17|MAPK8IP2|KIFBP|CYFIP2|TMOD2|MINK1|PAK6|KIDINS220|TMEM135|TCTN1|…	-1.6561e+16	13.0	0.0	0.0
0	1	1	0	1	0.0	-5109697318336040	-1.72239e+16	0.0	-5420274264140000	GO:0006836	GO Biological Processes	neurotransmitter transport	19_GO:0051179 localization	-1.86828e+16	6656814408612970	1.32538e+16	DDC|CLN8|KCNJ10|NF1|SEPTIN5|PPT1|PSEN1|PTPRN2|SLC6A1|SLC6A3|SLC6A8|SNAP25|STXBP1|SYN1|TH|PPFIA3|CADPS|SYNJ1|SLC6A5|NRXN1|NRXN2|RIMS2|SNPH|RIMS3|CPLX2|CPLX1|HRH3|RIMS1|UNC13A|SYT11|PIP5K1C|DNAJC5|STX1B|RIMS4|SLC6A17	-1611956639829820	4.0	0.0	0.0
1	0	0	1	1	-1845543959415350	0.0	0.0	-8624558243172150	-7158260783062400	GO:1901137	GO Biological Processes	carbohydrate derivative biosynthetic process	19_GO:0008152 metabolic process	-1845543959415350	5114312770562770	1.2418e+16	ACAT1|ATIC|DLD|DPAGT1|B4GALNT1|GART|HEXA|STT3A|ATP6|MTHFD1|NDUFA10|NDUFS1|NDUFS2|NDUFS3|NDUFV1|NDUFS4|NDUFS8|PNP|NPC1|PDHB|PMM2|PRPS1|PSEN1|RPN2|SDHA|ELOVL4|PDHX|GPAA1|ARFGEF1|MAN1B1|ALG6|RRM2B|PIGT|POMGNT1|ALG1|UGGT1|ELOVL5|ALG8|FA2H|SRD5A3|PANK2|PIGO|PIGS|NUS1|NDUFS7	-1.5584e+16	18.0	0.0	0.0
1	0	0	1	1	-8458298928259740	0.0	0.0	-8909320325176460	-1.66378e+16	GO:0007040	GO Biological Processes	lysosome organization	19_GO:0009987 cellular process	-1.83257e+16	7852592951602850	1.36773e+16	ATP6V1A|ATP6V0C|ATP6V0A1|ATP6AP1|TPP1|CLN3|CLN5|CLN8|MTOR|GBA1|GRN|HEXA|HEXB|LIPA|PPT1|RAB7A|WASHC5|ATP6AP2|ZFYVE26|CHMP4A|ATP6V1D|CHMP5|ATP6V1H|CLN6|ARL8B|VPS35|AKTIP|SPG11|SPNS1|MFSD8	-1.57765e+16	2.0	0.0	0.0
1	0	0	1	1	-8458298928259740	0.0	0.0	-8909320325176460	-1.66378e+16	GO:0080171	GO Biological Processes	lytic vacuole organization	19_GO:0009987 cellular process	-1.83257e+16	7852592951602850	1.36773e+16	ATP6V1A|ATP6V0C|ATP6V0A1|ATP6AP1|TPP1|CLN3|CLN5|CLN8|MTOR|GBA1|GRN|HEXA|HEXB|LIPA|PPT1|RAB7A|WASHC5|ATP6AP2|ZFYVE26|CHMP4A|ATP6V1D|CHMP5|ATP6V1H|CLN6|ARL8B|VPS35|AKTIP|SPG11|SPNS1|MFSD8	-1.57765e+16	2.0	0.0	0.0
1	1	0	1	1	-5294344042651270	-2.4772e+16	0.0	-6.10691e+16	-1.51862e+16	GO:0098771	GO Biological Processes	inorganic ion homeostasis	19_GO:0042592 homeostatic process	-1.82384e+16	380389394777884	1.14315e+16	ABCB7|ANK2|APP|ATP1A3|ATP2A2|ATP2B1|ATP2B2|ATP2B3|ATP6V1A|ATP6AP1|ATP7B|CALR|CLN3|CP|EXT2|FECH|FXN|FTL|GRIK2|GRIN1|HEXB|ITPR1|KCNJ10|SLC11A2|OTC|PRNP|PSEN1|RAP1GDS1|SLC8A2|SLC8A3|TMBIM6|HSP90B1|WFS1|XK|SLC39A7|ATP6V0D1|SLC12A6|ABCB6|BCAP31|AFG3L2|IMMT|PACS2|ATP13A2|SLC39A14|SLC39A6|NPTN|ATP2C1|CCDC22|TMCO1|SLC30A10|SLC12A9|CCDC47|SLC12A5|THADA|SLC25A23|KCTD17|NDFIP1|C19orf12|KCTD7|MICU2	-1.56961e+16	11.0	0.0	0.0
1	1	1	1	1	-4482868961298310	-3.69665e+16	-4435399931950410	-4554670529246760	-1.06213e+16	GO:0051668	GO Biological Processes	localization within membrane	19_GO:0051179 localization	-1.802e+16	3340423114791340	1.10236e+16	ANK2|ATP6AP1|BCS1L|CDH2|CLN3|CPE|TIMM8A|DLG4|GLRB|GRIK5|LMNB1|NPC1|PALM|RELN|PSAP|RAB6A|SNAP25|SPTBN1|SRP54|SRPRA|SSR1|STXBP1|THY1|RAB7A|FXR1|PEX3|SYNGAP1|AP3D1|TM9SF2|NRXN1|NRXN2|NUP155|RAPGEF2|EMC2|TMEM147|ARL6IP5|RER1|SLITRK3|CLSTN1|NFASC|EXOC6B|PACS2|NOMO1|STX12|SAMM50|PTPN23|NSG1|CCDC22|CHMP4A|TMCO1|SEC61A2|PACS1|VPS35|EXOC1|SCN3B|CCDC47|VPS35L|DENND1A|CACNG8|SIL1|REEP1|SPG11|BLTP1|SHANK3|MM…	-1.5492e+16	26.0	1.0	1.0
1	0	0	1	1	-5163603562422660	0.0	0.0	-5389036532439190	-1.29326e+16	GO:0034976	GO Biological Processes	response to endoplasmic reticulum stress	19_GO:0050896 response to stimulus	-1.80145e+16	5097729624635450	1.21776e+16	AMFR|ATP2A2|CALR|CANX|ATF6B|TOR1A|PDIA3|GSK3B|ITPR1|ATXN3|PIK3R1|PIK3R2|EIF2AK2|DNAJC3|PSMC6|SEL1L|TMBIM6|HSP90B1|VCP|WFS1|PLA2G6|EIF2B5|BRSK2|AIFM1|UBE4A|BCAP31|STUB1|MAN1B1|UFL1|ECPAS|UBQLN2|UBQLN1|TMCO1|UGGT1|CCDC47|ERMP1|HM13|SYVN1|TMEM67|FBXO44|DAB2IP|STT3B|NHLRC1	-1.5492e+16	27.0	1.0	1.0
1	0	0	1	1	-9071193093796980	0.0	0.0	-1061324515846160	-6.5144e+16	hsa05010	KEGG Pathway	Alzheimer disease		-1799452006423980	3.92425e+16	1.14344e+16	ADAM10|APP|ATP2A2|ATP5F1B|CALM1|CAPN1|CSNK2B|MTOR|GRIN1|GSK3B|ITPR1|KIF5A|LRP1|MAPT|ATP6|ND6|NDUFA10|NDUFS1|NDUFS2|NDUFS3|NDUFV1|NDUFS4|NDUFS8|SLC11A2|PIK3R1|PIK3R2|EIF2AK2|PSEN1|PSEN2|PSMA7|PSMC4|PSMC5|PSMC6|PSMD1|PSMD2|PSMD3|SDHA|TUBB2A|UQCRC1|UQCRC2|VDAC2|SLC39A7|NAE1|ATG13|PSMD6|APC2|RTN3|TUBB4A|PLCB1|NCSTN|SLC39A14|BACE1|SLC39A6|PIK3R4|ATG2B|RTN4|NDUFS7	-1547847101150950	9.0	0.0	0.0
1	1	1	1	1	-3335229314483570	-3.69783e+16	-1.78814e+16	-3038826321996320	-3559122102216380	GO:0032940	GO Biological Processes	secretion by cell	19_GO:0051179 localization	-1.79458e+16	3804357837284660	1133570583014620	AP1B1|APBA1|BCR|CANX|CPE|DMTN|MECP2|MTTP|NF1|NTRK2|PAFAH1B1|SEPTIN5|PPT1|PRF1|PSEN1|PTPRN|PTPRN2|RAB1A|SEL1L|SLC16A2|SNAP25|STXBP1|SYN1|PPFIA3|CADPS|SYNJ1|BRSK2|NRXN1|NRXN2|RIMS2|SNPH|RIMS3|ARFGEF1|CPLX2|CPLX1|COPS5|HRH3|COPG1|RIMS1|UNC13A|SYT11|EXOC6B|PIP5K1C|ARL8B|SMPD3|EXOC1|VPS11|TRAPPC11|TANGO6|DNAJC5|SRCIN1|SYT3|STX1B|RAB3C|TANGO2|RIMS4|LGI3|MIA3|SNX19	-1.54361e+16	4.0	0.0	0.0
1	1	1	0	1	-1.41772e+16	-2.84933e+16	-3826181305971530	0.0	-4.1889e+16	GO:0042552	GO Biological Processes	myelination	19_GO:0032502 developmental process	-1767529202771580	7189025886394300	1.31267e+16	ABCA2|ABCD1|ANK2|CNTN1|GALC|GPM6B|HEXA|HEXB|KCNJ10|MAG|NF1|NTRK2|PLP1|SCN2A|SCN8A|SLC8A3|XK|GNPAT|ATRN|BCAS1|EIF2B4|EIF2B2|EIF2B5|FIG4|AFG3L2|TPPP|NFASC|NCSTN|PRX|FA2H|SLC25A46	-1.51799e+16	28.0	1.0	1.0
1	1	1	0	1	-2.90248e+16	-4188414174000470	-1.12007e+16	0.0	-7088055200540000	GO:0032990	GO Biological Processes	cell part morphogenesis	19_GO:0032502 developmental process	-1.76685e+16	3.47856e+16	1101281993691820	APLP1|APLP2|APP|RERE|DDR1|CDH4|CHRNB2|CNTN1|CTNNA2|DAB1|DLG4|CELSR2|FOXG1|GAP43|GPM6A|ARHGAP35|HPRT1|KIF5A|L1CAM|MAP1A|MAP1B|NCAM1|SLC11A2|NRCAM|OPHN1|PAFAH1B1|RELN|SH3GL2|SLIT1|STXBP1|NKX2-1|TNR|UCHL1|VLDLR|USP9X|KLF7|SYNGAP1|BRSK2|NRXN1|FEZ2|SLC9A6|SEMA6B|AFG3L2|SLITRK3|SPART|NFASC|ZDHHC17|MAPK8IP2|KIFBP|CYFIP2|MINK1|PAK6|KIDINS220|TMEM135|TCTN1|PANK2|SPG11|NUBPL|SHANK3|SLC25A46|CNTN4|DAB2IP|AR…	-1.51799e+16	13.0	0.0	0.0
1	1	0	1	1	-7.30054e+16	-3.71596e+16	0.0	-9787606949569580	-5.69509e+16	GO:0043161	GO Biological Processes	proteasome-mediated ubiquitin-dependent protein catabolic process	19_GO:0008152 metabolic process	-1766509978213640	4108986321596290	1.14477e+16	AMFR|ARRB1|CALR|CANX|DDB1|GBA1|GSK3B|ATXN3|PEX10|PSMA7|PSMC4|PSMC5|PSMC6|PSMD1|PSMD2|PSMD3|SEL1L|TAF1|HSP90B1|UBE2A|UCHL1|VCP|WFS1|CUL3|CUL2|CDC23|UBE4A|PSMF1|PSMD6|PJA2|STUB1|APC2|MAN1B1|ECPAS|ANAPC13|TRPC4AP|UBQLN2|UBQLN1|CRBN|RNF216|CCDC47|ANAPC1|KCTD17|FBXL18|DCAF11|SYVN1|TMEM67|FBXO44|AGAP3|UBR3|FBXL16|STT3B|NHLRC1	-1.51799e+16	3.0	0.0	0.0
1	1	0	1	1	-9203339714085590	-2.8583e+16	0.0	-8569300051492780	-1284982865601720	GO:0007034	GO Biological Processes	vacuolar transport	19_GO:0051179 localization	-1.75999e+16	5822448384948380	1242771093986140	SCARB2|LYST|CLN3|GRN|IGF2R|LAMP1|LAMP2|LIPA|LRP1|NPC1|PSAP|SORT1|VCP|RAB7A|STAM|SQSTM1|AP3D1|ATP6V0D1|VPS13A|ATP13A2|PTPN23|VPS41|CHMP4A|PIK3R4|ANKFY1|CHMP5|VPS13C|VPS13D|ARL8B|VPS35|VPS11|CACNG8|AKTIP|VPS16|NDFIP1|GNPTG|C9orf72	-1.51206e+16	29.0	1.0	1.0
1	0	0	1	0	-1.75981e+16	0.0	0.0	-117366754328813	0.0	GO:0043604	GO Biological Processes	amide biosynthetic process	19_GO:0008152 metabolic process	-1.75981e+16	5231319188191880	1.21886e+16	AARS1|ACAT1|APEH|ASAH1|DLD|EIF2B1|EPRS1|B4GALNT1|GBA1|GSS|NARS1|NCBP1|OTC|PDHB|RARS1|SMPD1|ELOVL4|TUFM|PDHX|EIF2B4|EIF2B3|EIF2B2|EIF2B5|SKIC3|SLC25A15|SPTLC1|GCN1|COPS5|TCF25|HARS2|LARS1|DHX29|PTCD3|DARS2|IARS2|VARS2|AARS2|ELOVL5|FA2H|TARS2|GFM1|MTFMT	-1.48059e+16	8.0	0.0	0.0
0	1	1	0	1	0.0	-3.40161e+16	-1.75076e+16	0.0	-291128965587746	GO:0023061	GO Biological Processes	signal release	19_GO:0051179 localization	-1.75076e+16	1.55696e+16	1.66212e+16	CPE|SEPTIN5|PTPRN|PTPRN2|STXBP1|PPFIA3|CADPS|NRXN1|NRXN2|RIMS2|SNPH|RIMS3|CPLX2|CPLX1|HRH3|UNC13A|PIP5K1C|SMPD3|STX1B|RIMS4	-1.47272e+16	25.0	0.0	0.0
1	1	1	0	1	-1.40329e+16	-2815893794134500	-3784826922261040	0.0	-4.14098e+16	GO:0007272	GO Biological Processes	ensheathment of neurons	19_GO:0032502 developmental process	-1.74354e+16	7065077164215090	1.29765e+16	ABCA2|ABCD1|ANK2|CNTN1|GALC|GPM6B|HEXA|HEXB|KCNJ10|MAG|NF1|NTRK2|PLP1|SCN2A|SCN8A|SLC8A3|XK|GNPAT|ATRN|BCAS1|EIF2B4|EIF2B2|EIF2B5|FIG4|AFG3L2|TPPP|NFASC|NCSTN|PRX|FA2H|SLC25A46	-1.49676e+16	28.0	0.0	0.0
1	1	1	0	1	-1.40329e+16	-2815893794134500	-3784826922261040	0.0	-4.14098e+16	GO:0008366	GO Biological Processes	axon ensheathment	19_GO:0032502 developmental process	-1.74354e+16	7065077164215090	1.29765e+16	ABCA2|ABCD1|ANK2|CNTN1|GALC|GPM6B|HEXA|HEXB|KCNJ10|MAG|NF1|NTRK2|PLP1|SCN2A|SCN8A|SLC8A3|XK|GNPAT|ATRN|BCAS1|EIF2B4|EIF2B2|EIF2B5|FIG4|AFG3L2|TPPP|NFASC|NCSTN|PRX|FA2H|SLC25A46	-1.49676e+16	28.0	0.0	0.0
1	1	1	0	1	-3.35824e+16	-2.53953e+16	-1.00597e+16	0.0	-1.00324e+16	GO:0061564	GO Biological Processes	axon development	19_GO:0032502 developmental process	-1739736143607500	3758209927327570	1.11216e+16	APLP1|APLP2|APP|DDR1|CDH4|CHRNB2|CNTN1|CTNNA2|DAB1|MEGF8|FOXG1|FOLR1|GAP43|GPM6B|ARHGAP35|KIF5A|L1CAM|MAG|MAP1A|MAP1B|MAPT|NCAM1|NRCAM|OPHN1|PAFAH1B1|PLP1|RELN|SLIT1|STXBP1|NKX2-1|TNR|UCHL1|USP9X|KLF7|SYNGAP1|BRSK2|NRXN1|FEZ2|SLC9A6|SEMA6B|AFG3L2|SLITRK3|NMNAT2|SPART|NFASC|MAPK8IP3|ZDHHC17|KIFBP|CYFIP2|RTN4|TBC1D24|TCTN1|SPG11|SLC25A46|CNTN4|ARX|C9orf72|ARK2C	-1.49353e+16	13.0	0.0	0.0
1	1	1	0	1	-3189708800429480	-3581929534090670	-1.06834e+16	0.0	-7397955201628110	GO:0048667	GO Biological Processes	cell morphogenesis involved in neuron differentiation	19_GO:0032502 developmental process	-1728907003789610	3.68744e+16	1.10364e+16	APLP1|APLP2|APP|RERE|CDH4|CHRNB2|CNTN1|CTNNA2|DAB1|DLG4|CELSR2|FOXG1|GAP43|ARHGAP35|HEXA|HPRT1|KIF5A|L1CAM|MAP1A|MAP1B|NCAM1|SLC11A2|NRCAM|OPHN1|PAFAH1B1|RELN|SLIT1|STXBP1|TBCD|NKX2-1|TNR|UCHL1|VLDLR|USP9X|KLF7|SYNGAP1|BRSK2|NRXN1|FEZ2|SLC9A6|SEMA6B|AFG3L2|SLITRK3|SPART|NFASC|ZDHHC17|MAPK8IP2|KIFBP|CYFIP2|MINK1|KIDINS220|TCTN1|SPG11|SHANK3|SLC25A46|CNTN4|ARX|C9orf72|ARK2C	-1.48326e+16	13.0	0.0	0.0
1	1	1	0	1	-2.0015e+16	-3837181045658740	-1.17344e+16	0.0	-7514320750000590	GO:0048812	GO Biological Processes	neuron projection morphogenesis	19_GO:0032502 developmental process	-1.72072e+16	3.53254e+16	1.09001e+16	APLP1|APLP2|APP|RERE|DDR1|CDH4|CHRNB2|CNTN1|CTNNA2|DAB1|DLG4|CELSR2|FOXG1|GAP43|GPM6A|ARHGAP35|HPRT1|KIF5A|L1CAM|MAP1A|MAP1B|NCAM1|SLC11A2|NRCAM|OPHN1|PAFAH1B1|RELN|SH3GL2|SLIT1|STXBP1|NKX2-1|TNR|UCHL1|VLDLR|USP9X|KLF7|SYNGAP1|BRSK2|NRXN1|FEZ2|SLC9A6|SEMA6B|AFG3L2|SLITRK3|SPART|NFASC|ZDHHC17|MAPK8IP2|KIFBP|CYFIP2|MINK1|PAK6|KIDINS220|TCTN1|SPG11|SHANK3|SLC25A46|CNTN4|DAB2IP|ARX|C9orf72|ARK2C	-1475629513379290	13.0	0.0	0.0
1	1	1	0	1	-3336032135597000	-3.59602e+16	-9508583133691410	0.0	-7101732291299140	GO:0000904	GO Biological Processes	cell morphogenesis involved in differentiation	19_GO:0032502 developmental process	-1.7107e+16	343199194314813	1.07948e+16	APLP1|APLP2|APP|RERE|CDH4|CHRNB2|CNTN1|CTNNA2|DAB1|DLG4|CELSR2|FOXG1|GAP43|ARHGAP35|HEXA|HPRT1|KIF5A|L1CAM|MAP1A|MAP1B|NCAM1|SLC11A2|NRCAM|OPHN1|PAFAH1B1|RELN|SLIT1|STXBP1|TBCD|NKX2-1|TNR|UCHL1|VLDLR|USP9X|BAP1|CUL3|KLF7|SYNGAP1|PLOD3|BRSK2|NRXN1|FEZ2|SLC9A6|SEMA6B|AFG3L2|SLITRK3|SPART|NFASC|ZDHHC17|MAPK8IP2|KIFBP|CYFIP2|MINK1|KIDINS220|TCTN1|SPG11|SHANK3|SLC25A46|CNTN4|ARX|ARL13B|C9orf72|CCDC88C…	-1466152021677900	13.0	0.0	0.0
0	1	1	0	1	0.0	-3.79419e+16	-1.16427e+16	0.0	-7440905261675540	GO:0120039	GO Biological Processes	plasma membrane bounded cell projection morphogenesis	19_GO:0032502 developmental process	-1.69766e+16	3494878256072280	1.07966e+16	APLP1|APLP2|APP|RERE|DDR1|CDH4|CHRNB2|CNTN1|CTNNA2|DAB1|DLG4|CELSR2|FOXG1|GAP43|GPM6A|ARHGAP35|HPRT1|KIF5A|L1CAM|MAP1A|MAP1B|NCAM1|SLC11A2|NRCAM|OPHN1|PAFAH1B1|RELN|SH3GL2|SLIT1|STXBP1|NKX2-1|TNR|UCHL1|VLDLR|USP9X|KLF7|SYNGAP1|BRSK2|NRXN1|FEZ2|SLC9A6|SEMA6B|AFG3L2|SLITRK3|SPART|NFASC|ZDHHC17|MAPK8IP2|KIFBP|CYFIP2|MINK1|PAK6|KIDINS220|TCTN1|SPG11|SHANK3|SLC25A46|CNTN4|DAB2IP|ARX|C9orf72|ARK2C	-1.45401e+16	13.0	0.0	0.0
1	1	1	0	1	-2373484691252460	-3039465042135190	-9686368744606110	0.0	-915716167285328	GO:0000902	GO Biological Processes	cell morphogenesis	19_GO:0032502 developmental process	-1697485912789410	3.04574e+16	1.04623e+16	APLP1|APLP2|APP|RERE|DDR1|CAPZB|CDH2|CDH4|CDH10|CHRNB2|CNTN1|CTNNA2|DAB1|DLG4|CELSR2|FOXG1|GAP43|GPM6A|ARHGAP35|HEXA|HPRT1|ITPR1|KIF5A|L1CAM|LIPA|MAP1A|MAP1B|NCAM1|SLC11A2|NRCAM|OPHN1|PAFAH1B1|RELN|SH3GL2|SLIT1|STXBP1|TBCD|NKX2-1|TNR|UCHL1|VLDLR|USP9X|BAP1|CUL3|KLF7|SYNGAP1|PLOD3|BRSK2|NRXN1|FEZ2|SLC9A6|SEMA6B|AFG3L2|SLITRK3|SPART|NFASC|ZDHHC17|MAPK8IP2|KIFBP|CYFIP2|MINK1|PAK6|KIDINS220|CDH22|TCT…	-1.45401e+16	13.0	0.0	0.0
1	0	0	1	1	-7081523663623350	0.0	0.0	-1.07299e+16	-837730443044174	GO:0010256	GO Biological Processes	endomembrane system organization	19_GO:0009987 cellular process	-1.68533e+16	3244982454368730	1.05741e+16	AP1B1|ABCD1|ANK2|ARL1|ATP2A2|ATP6V1A|ATP6V0C|ATP6V0A1|ATP6AP1|LYST|CLN3|DNM1|TOR1A|FOLR1|HTT|LMNB1|PAFAH1B1|PTPRN|RAB1A|RAB2A|SMPD1|SNAP25|SPTBN1|VRK1|REEP5|STAM|USO1|GBF1|SQSTM1|AP3D1|ZW10|NUP155|EMC2|WASHC5|ATP6AP2|RTN3|TMEM147|COG5|ARFGEF1|CIT|SYT11|SLC9A8|DNAJC13|SYNE1|NOMO1|CHMP4A|ATP6V1D|CHMP5|ATP6V1H|TMCO1|ARL8B|VPS11|CCDC47|RTN4|PRX|TRAPPC11|ANO3|AKTIP|REEP1|FA2H|FHDC1|MMGT1|STX1B|TANGO2|…	-1.4429e+16	5.0	0.0	0.0
1	1	0	1	1	-8984204365220240	-2511609036565930	0.0	-7734861268281170	-8637439345730000	GO:0016236	GO Biological Processes	macroautophagy	19_GO:0008152 metabolic process	-1.6811e+16	5233733271804330	1182047695780800	ATM|ATP2A2|CALM1|CALR|CLN3|CTSD|MTOR|GBA1|LAMP2|NPC1|PSEN1|PEX2|RAB1A|VCP|RAB7A|STAM|SQSTM1|ATG13|TBC1D5|WDR45|WDFY3|PACS2|UFL1|ATP13A2|ZFYVE26|STX12|VPS41|CHMP4A|UBQLN2|UBQLN1|PIK3R4|CHMP5|ATG2B|ARL8B|SNX14|VPS16|SPG11|WDR81|MFSD8	-1.43918e+16	21.0	0.0	0.0
0	1	1	0	1	0.0	-3751802233347890	-1.15521e+16	0.0	-736846545769074	GO:0048858	GO Biological Processes	cell projection morphogenesis	19_GO:0032502 developmental process	-1674944105892190	3458012451683330	1069455663158900	APLP1|APLP2|APP|RERE|DDR1|CDH4|CHRNB2|CNTN1|CTNNA2|DAB1|DLG4|CELSR2|FOXG1|GAP43|GPM6A|ARHGAP35|HPRT1|KIF5A|L1CAM|MAP1A|MAP1B|NCAM1|SLC11A2|NRCAM|OPHN1|PAFAH1B1|RELN|SH3GL2|SLIT1|STXBP1|NKX2-1|TNR|UCHL1|VLDLR|USP9X|KLF7|SYNGAP1|BRSK2|NRXN1|FEZ2|SLC9A6|SEMA6B|AFG3L2|SLITRK3|SPART|NFASC|ZDHHC17|MAPK8IP2|KIFBP|CYFIP2|MINK1|PAK6|KIDINS220|TCTN1|SPG11|SHANK3|SLC25A46|CNTN4|DAB2IP|ARX|C9orf72|ARK2C	-1433538154472900	13.0	0.0	0.0
0	1	1	0	1	0.0	-3.84808e+16	-1288396546690170	0.0	-7371872230314050	GO:0001505	GO Biological Processes	regulation of neurotransmitter levels	19_GO:0065007 biological regulation	-1.66834e+16	5059724964031180	1.16771e+16	ATP2A2|CLN3|COMT|TOR1A|CLN8|GFAP|GPM6B|KCNJ10|NF1|SEPTIN5|PPT1|PRKCG|PSEN1|PTPRN2|SLC6A1|SLC6A3|SNAP25|STXBP1|SYN1|TH|ALDH5A1|PPFIA3|CADPS|SYNJ1|NRXN1|NRXN2|RIMS2|SNPH|RIMS3|CPLX2|CPLX1|HRH3|RIMS1|UNC13A|SYT11|PIP5K1C|GIT1|DNAJC5|STX1B|RIMS4	-1.42744e+16	4.0	0.0	0.0
1	1	0	1	0	-1662533917055550	-2.02703e+16	0.0	-1.36557e+16	0.0	R-HSA-1428517	Reactome Gene Sets	The citric acid (TCA) cycle and respiratory electron transport		-1662533917055550	9481591091492770	1.39162e+16	ACO2|DLD|ATP6|NDUFA10|NDUFS1|NDUFS2|NDUFS3|NDUFV1|NDUFS4|NDUFS8|PDHB|SDHA|SURF1|UQCRC1|UQCRC2|PDHX|LRPPRC|TRAP1|ACAD9|L2HGDH|NUBPL|NDUFAF2|COX20|NDUFAF6|NDUFS7	-1.39e+16	18.0	0.0	0.0
1	1	1	1	1	-2.94499e+16	-2.03248e+16	-1.07055e+16	-490662206652516	-6693344644473860	R-HSA-9675108	Reactome Gene Sets	Nervous system development		-1.64558e+16	3155981561690900	1037667985312380	ACTB|ADAM10|AP2A1|ANK2|CLTC|CNTN1|CRMP1|CSNK2B|DAB1|DCX|DLG4|DNM1|DPYSL2|DPYSL3|GAP43|GRIN1|ARHGAP35|GSK3B|KCNQ2|KCNQ3|L1CAM|MAG|NCAM1|NCBP1|NRCAM|PIK3R1|PIK3R2|PRNP|RELN|PSEN1|PSEN2|PSMA7|PSMC4|PSMC5|PSMC6|PSMD1|PSMD2|PSMD3|RPS6KA3|SCN1A|SCN2A|SCN8A|SH3GL2|SLIT1|SPTB|SPTBN1|SPTBN2|TUBB2A|VLDLR|CUL2|CACNA1I|CACNA1G|PSMF1|PSMD6|SRGAP3|ACTR3|PSME3|TUBB4A|NFASC|NCSTN|PIP5K1C|GIT1|SCN3B|PAK6|PAK5|PRX…	-1.40517e+16	30.0	1.0	1.0
1	1	0	1	1	-9155832545175810	-2.98297e+16	0.0	-6343427044981150	-8648185286881210	GO:0010506	GO Biological Processes	regulation of autophagy	19_GO:0008152 metabolic process	-1.64293e+16	3.9166e+16	1.08975e+16	ATM|ATP6V1A|ATP6V0C|ATP6V0A1|CAPN1|CLN3|EEF1A2|EIF4G2|ERCC4|MTOR|GBA1|GFAP|GSK3B|HTT|ITPR1|MAPT|NPC1|PIK3R2|CTSA|PSAP|UCHL1|EPM2A|NPRL3|SQSTM1|ATP6V0D1|TMEM59|FEZ2|RUBCN|ATG13|RRAGB|SPTLC1|CAMKK2|USP20|WDR45|MTCL1|UFL1|ATP13A2|UBQLN2|UBQLN1|PIK3R4|ATP6V1D|ATP6V1H|VPS13C|VPS13D|VPS35|EXOC1|SCOC|PIP4K2C|MTDH|C9orf72|FOXK1|MFSD8	-1.40301e+16	31.0	1.0	1.0
1	1	1	1	1	-301303245282907	-2.80661e+16	-1.61321e+16	-3.68616e+16	-3635055110711310	GO:0046903	GO Biological Processes	secretion	19_GO:0051179 localization	-162781159871981	3.26694e+16	1.03992e+16	AP1B1|APBA1|ATP7B|BCR|DDR1|CANX|COPA|CPE|CELSR2|DMTN|MECP2|MTTP|NF1|NTRK2|PAFAH1B1|SEPTIN5|PPT1|PRF1|PSEN1|PTPRN|PTPRN2|RAB1A|SEL1L|SLC6A3|SLC16A2|SNAP25|STXBP1|SYN1|PPFIA3|CADPS|SYNJ1|BRSK2|NEURL1|NRXN1|NRXN2|RIMS2|SNPH|RIMS3|ARFGEF1|CPLX2|CPLX1|COPS5|HRH3|COPG1|RIMS1|UNC13A|SYT11|EXOC6B|PIP5K1C|ARL8B|SMPD3|EXOC1|VPS11|TRAPPC11|TANGO6|DNAJC5|SRCIN1|SYT3|STX1B|RAB3C|TANGO2|RIMS4|LGI3|MIA3|SNX19	-1.38933e+16	4.0	0.0	0.0
0	1	1	0	1	0.0	-4554485138131090	-8134124216808530	0.0	-954873182459979	R-HSA-112315	Reactome Gene Sets	Transmission across Chemical Synapses		-1626781124032110	4406177156177150	1114694132344540	ADCY5|AP2A1|ALDH2|APBA1|CACNA1A|CALM1|CHRNA4|CHRNB2|COMT|DLG4|GABRA3|GLRA1|GLRB|GNAL|GRIA2|GRIA3|GRIK2|GRIK5|GRIN1|KCNJ10|MAPT|PDPK1|PRKCG|RPS6KA3|SLC6A1|SLC6A3|SNAP25|STXBP1|SYN1|TSPAN7|TUBB2A|ALDH5A1|PPFIA4|PPFIA3|CACNA2D2|TUBB4A|ARL6IP5|CAMKK2|CPLX1|RIMS1|PLCB1|NPTN|GIT1|CACNG8|DNAJC5	-1.38877e+16	20.0	0.0	0.0
1	0	1	1	1	-1.35959e+16	0.0	-2.61751e+16	-2.11592e+16	-3978764476737610	GO:0042063	GO Biological Processes	gliogenesis	19_GO:0032502 developmental process	-1.61116e+16	4456822870615970	1.11209e+16	ABCA2|APP|CDH2|CNTN1|DAB1|EIF2B1|PTK2B|FOXG1|MTOR|GAP43|GBA1|GFAP|GPM6B|GRN|HEXB|KCNJ10|LRP1|MAG|MAPT|MECP2|NDUFS2|NF1|NTRK2|PAFAH1B1|PLP1|RELN|PSEN1|SLC8A3|NKX2-1|CUL4B|EIF2B4|EIF2B3|EIF2B2|EIF2B5|ADGRG1|TPPP|NCSTN|ORC3|RTN4|PRX|FA2H|SLC25A46|DNER|DAB2IP	-1.37362e+16	28.0	0.0	0.0
1	1	1	1	1	-2.39814e+16	-2159775566453830	-1.10907e+16	-5154984499592440	-6338694996821320	R-HSA-422475	Reactome Gene Sets	Axon guidance		-1.57561e+16	3155237167895390	1.0142e+16	ACTB|ADAM10|AP2A1|ANK2|CLTC|CNTN1|CRMP1|CSNK2B|DAB1|DCX|DLG4|DNM1|DPYSL2|DPYSL3|GAP43|GRIN1|ARHGAP35|GSK3B|KCNQ2|KCNQ3|L1CAM|NCAM1|NCBP1|NRCAM|PIK3R1|PIK3R2|PRNP|RELN|PSEN1|PSEN2|PSMA7|PSMC4|PSMC5|PSMC6|PSMD1|PSMD2|PSMD3|RPS6KA3|SCN1A|SCN2A|SCN8A|SH3GL2|SLIT1|SPTB|SPTBN1|SPTBN2|TUBB2A|VLDLR|CUL2|CACNA1I|CACNA1G|PSMF1|PSMD6|SRGAP3|ACTR3|PSME3|TUBB4A|NFASC|NCSTN|PIP5K1C|GIT1|SCN3B|PAK6|PAK5|ARHGAP3…	-1.33886e+16	30.0	0.0	0.0
0	1	1	0	1	0.0	-4867666178187710	-1.27424e+16	0.0	-5149990769811320	GO:0050806	GO Biological Processes	positive regulation of synaptic transmission	19_GO:0048518 positive regulation of biological process	-1575490531323300	5.81615e+16	1172424742692510	APP|DLG4|PTK2B|GFAP|GRIK2|GRIN1|MECP2|MPP2|NTRK2|PRKCG|LGMN|RELN|SLC8A2|SLC8A3|SNAP25|STXBP1|TNR|SQSTM1|NRXN1|RIMS2|CLSTN3|RIMS3|CLSTN1|RIMS1|CRTC1|NPTN|CACNG8|PRRT1|SHANK3|STX1B|RIMS4|NALCN|LRRTM1	-1.33886e+16	1.0	0.0	0.0
1	1	0	1	1	-1198518802281700	-2994400100585620	0.0	-7594216673609280	-3.7182e+16	GO:0048193	GO Biological Processes	Golgi vesicle transport	19_GO:0051179 localization	-1.5591e+16	4233693352910430	1.07979e+16	AP2A1|ARL1|CLN3|COPA|COPB1|HTT|LAMP1|RAB1A|RAB6A|SORT1|SEC13|SPTBN1|VCP|CUL3|USO1|GBF1|NAPG|AP3D1|ZW10|COPB2|GOSR2|SEC24C|SCAMP3|ATP9A|BCAP31|COG5|SEC23B|KIF1C|RER1|COPG1|SCAP|VPS13A|EXOC6B|CCDC22|SAR1B|ANKFY1|NBAS|VPS13C|EXOC1|BCAP29|VPS35L|RINT1|TRAPPC11|TRAPPC9|MIA3	-1.32337e+16	10.0	0.0	0.0
0	1	1	1	1	0.0	-4478463702504570	-8951212229713480	-4777407067044660	-5319873838121080	GO:0060627	GO Biological Processes	regulation of vesicle-mediated transport	19_GO:0051179 localization	-1.55021e+16	3186387999947320	1.00781e+16	ABCA2|ACTB|ARRB1|ATP2A2|BCR|CALR|CLN3|DLG4|TOR1A|GRIK5|HPCA|LAMP1|LRP1|OPHN1|PDPK1|SEPTIN5|PPT1|PRKCG|PSEN1|RIT2|ATXN2|SMPD1|STXBP1|SYN1|RAB7A|STAM|PLA2G6|CADPS|SYNJ1|BSN|RIMS2|RUBCN|TBC1D5|RIMS3|DNAJC6|SNAP91|ATP9A|CPLX2|CPLX1|RIMS1|SYT11|DNAJC13|ATP13A2|PTPN23|ATP2C1|GIT1|UBQLN2|ANKFY1|AHI1|SMPD3|VAC14|VPS11|CAMK1D|RINT1|SMAP1|DNAJC5|SYT3|STX1B|RAB3C|RIMS4|SIRPA|LGI3|LRRTM1|RAB15	-1.31492e+16	32.0	1.0	1.0
0	1	1	0	1	0.0	-2983658324802870	-1.54326e+16	0.0	-3.68464e+16	GO:0016079	GO Biological Processes	synaptic vesicle exocytosis	19_GO:0051179 localization	-1.54326e+16	3.01975e+16	1.92435e+16	SEPTIN5|STXBP1|PPFIA3|CADPS|RIMS2|SNPH|RIMS3|CPLX2|CPLX1|UNC13A|PIP5K1C|STX1B|RIMS4	-1.28244e+16	25.0	0.0	0.0
1	0	0	1	1	-1100320000488510	0.0	0.0	-6642440449175480	-1.36733e+16	R-HSA-6798695	Reactome Gene Sets	Neutrophil degranulation		-1.52558e+16	3.29776e+16	100720594669341	ACAA1|ACLY|ADAM10|AGA|APEH|ASAH1|ATP6V0C|ATP6V0A1|CAPN1|COPB1|CSNK2B|CSTB|CTSB|CTSD|CYB5R3|DYNC1H1|FTL|GLB1|GRN|HEXB|IGF2R|LAMP1|LAMP2|LTA4H|MAN2B1|MANBA|NEU1|PNP|CTSA|PRCP|DNAJC3|PSAP|PSEN1|PSMD1|PSMD2|PSMD3|PTPRN2|RAB6A|SNAP25|VCP|RAB7A|PDXK|PSMD6|HUWE1|ATP6AP2|NPC2|NFASC|ATP11A|DNAJC13|NCSTN|DYNC1LI1|ATP6V1D|CAB39|TOLLIP|TMEM30A|ACTR10|VPS35L|CEP290|DNAJC5|SIRPA	-1.29073e+16	33.0	1.0	1.0
1	1	0	1	1	-8889787728329230	-2046903783195300	0.0	-6395568394635020	-3.78896e+16	R-HSA-5619115	Reactome Gene Sets	Disorders of transmembrane transporters		-1.52188e+16	5257370470438650	1123115598706980	ABCA3|ABCD1|CP|KCNJ11|SLC11A2|PSMA7|PSMC4|PSMC5|PSMC6|PSMD1|PSMD2|PSMD3|SEC13|SEL1L|SLC2A1|SLC6A3|ABCC8|VCP|NUP214|AAAS|SLC6A5|SLC33A1|PSMF1|NUP155|PSMD6|POM121|SLC12A6|ABCB6|PSME3|SLC9A6|SLC27A4|SLC17A5|NUP133|LMBRD1|SLC6A19	-1.28746e+16	34.0	1.0	1.0
1	0	0	1	0	-1502838659357450	0.0	0.0	-6557109314563080	0.0	R-HSA-611105	Reactome Gene Sets	Respiratory electron transport		-1502838659357450	1.24531e+16	1.42769e+16	NDUFA10|NDUFS1|NDUFS2|NDUFS3|NDUFV1|NDUFS4|NDUFS8|SDHA|SURF1|UQCRC1|UQCRC2|LRPPRC|TRAP1|ACAD9|NUBPL|NDUFAF2|COX20|NDUFAF6|NDUFS7	-1.24722e+16	18.0	0.0	0.0
0	0	0	1	1	0.0	0.0	0.0	-5984069898966770	-1475190264352610	GO:0051453	GO Biological Processes	regulation of intracellular pH	19_GO:0042592 homeostatic process	-1475190264352610	1938138163797150	1.62652e+16	ATP6V0C|ATP6V0A1|ATP6AP1|CLN3|CLN5|GRN|PPT1|UBE3A|ATP6AP2|SLC9A6|DMXL2|CLN6|SLC4A10|SLC12A5|SPNS1	-1.22163e+16	2.0	0.0	0.0
1	1	1	0	1	-2.5942e+16	-4483184624432310	-1137816749440240	0.0	-3.95852e+16	GO:0007613	GO Biological Processes	memory	19_GO:0032501 multicellular organismal process	-1.46743e+16	6182861493345360	114665274275074	CHRNB2|MAP1A|MAPT|MECP2|PRNP|LGMN|RELN|PSEN1|ATXN1|SCN2A|SLC6A1|SLC8A2|SLC8A3|ABCC8|TH|VLDLR|PLA2G6|PJA2|CIC|SYT11|PLCB1|CUX2|CRTC1|PAK6|PAK5|JPH3|CSMD1|SPG11|SHANK3	-1.23344e+16	1.0	0.0	0.0
1	1	0	1	0	-8653911123248520	-341633168547204	0.0	-1.45752e+16	0.0	GO:0006091	GO Biological Processes	generation of precursor metabolites and energy	19_GO:0008152 metabolic process	-1.45752e+16	7817411083540110	1.23201e+16	ACAT1|ACLY|ACO2|ATP5F1B|DLAT|GBE1|GFPT1|MDH2|ME2|ND6|NDUFS1|NDUFS2|NDUFV1|OGDH|PDHA1|PDHB|PHKB|QDPR|SDHA|TKT|UQCRC1|UQCRC2|SUCLA2|PTGES3|PANK2	-1205276233867670	35.0	1.0	1.0
1	0	1	0	1	-4474645467992560	0.0	-811726317175439	0.0	-4.6817e+16	GO:0051129	GO Biological Processes	negative regulation of cellular component organization	19_GO:0048519 negative regulation of biological process	-1.45526e+16	2.75004e+16	9430063557765910	ABCA2|ADD1|ADD2|PARP1|ATM|CAPZB|CRMP1|CTNNA2|DAB1|DLG4|DPYSL3|DMTN|ERCC4|FLII|FXN|GBA1|GDI1|GFAP|GSK3B|MAG|MAP1B|MAPT|OPA1|PAFAH1B1|PIK3R1|PRNP|PSEN1|RIT2|ATXN2|ATXN7|SLIT1|SPTB|SPTBN1|SPTBN2|STXBP1|TBCD|THY1|TNR|UBE3A|VBP1|VDAC2|XRCC1|RAB7A|TNKS|SYNGAP1|ZW10|FEZ2|RAPGEF2|RUBCN|HUWE1|APC2|TUBB4A|SEMA6B|ARFGEF1|FAM107A|RUFY3|SPART|SYT11|SACS|GHITM|TMOD2|UBQLN2|CRBN|NAT10|VPS35|RTN4|CTC1|SHANK3|TME…	-1.22169e+16	36.0	1.0	1.0
1	1	0	1	0	-1.25885e+16	-2873707621760650	0.0	-1.19522e+16	0.0	hsa05014	KEGG Pathway	Amyotrophic lateral sclerosis		-1.44703e+16	3.63146e+16	1.00147e+16	ACTB|ATP5F1B|MTOR|GRIA2|GRIN1|KIF5A|ATP6|ND6|NCBP1|NDUFA10|NDUFS1|NDUFS2|NDUFS3|NDUFV1|NDUFS4|NDUFS8|PSMA7|PSMC4|PSMC5|PSMC6|PSMD1|PSMD2|PSMD3|RAB1A|ATXN2|SDHA|SEC13|TUBB2A|UQCRC1|UQCRC2|VCP|NUP214|SQSTM1|NUP155|ATG13|PSMD6|POM121|FIG4|TUBB4A|SETX|UBQLN2|UBQLN1|PIK3R4|ATG2B|NUP133|ACTR10|SPG11|C9orf72|NDUFS7|POM121C	-1213877329871730	9.0	0.0	0.0
1	0	0	1	0	-1439821305321020	0.0	0.0	-679431501884878	0.0	R-HSA-163200	Reactome Gene Sets	Respiratory electron transport, ATP synthesis by chemiosmotic coupling, and heat production by uncoupling proteins.		-1439821305321020	1063132733408320	1.33369e+16	ATP6|NDUFA10|NDUFS1|NDUFS2|NDUFS3|NDUFV1|NDUFS4|NDUFS8|SDHA|SURF1|UQCRC1|UQCRC2|LRPPRC|TRAP1|ACAD9|NUBPL|NDUFAF2|COX20|NDUFAF6|NDUFS7	-1.18885e+16	18.0	0.0	0.0
0	0	0	1	1	0.0	0.0	0.0	-5802530350996700	-1438207291697460	GO:0030641	GO Biological Processes	regulation of cellular pH	19_GO:0042592 homeostatic process	-1438207291697460	1.83505e+16	1.57797e+16	ATP6V0C|ATP6V0A1|ATP6AP1|CLN3|CLN5|GRN|PPT1|UBE3A|ATP6AP2|SLC9A6|DMXL2|CLN6|SLC4A10|SLC12A5|SPNS1	-1187861299155240	2.0	0.0	0.0
0	0	1	0	1	0.0	0.0	-1.4287e+16	0.0	-2775960256657870	GO:0045055	GO Biological Processes	regulated exocytosis	19_GO:0051179 localization	-1.4287e+16	160021164021164	1.50892e+16	BCR|DMTN|SEPTIN5|STXBP1|PPFIA3|CADPS|RIMS2|SNPH|RIMS3|CPLX2|CPLX1|UNC13A|PIP5K1C|SYT3|STX1B|RIMS4	-1.17957e+16	25.0	0.0	0.0
0	1	1	0	1	0.0	-2.36726e+16	-9235853333487550	0.0	-697423149942071	GO:0031346	GO Biological Processes	positive regulation of cell projection organization	19_GO:0048518 positive regulation of biological process	-1.42766e+16	3649059391312910	9954721895344720	DDR1|SCARB2|CDH4|CNTN1|DLG4|DPYSL3|MEGF8|PTK2B|MTOR|GDI1|GPM6A|RAPGEF1|GRN|ARHGAP35|GSK3B|HTT|L1CAM|MAP1B|MAPT|NRDC|NTRK2|PAFAH1B1|PALM|SERPINI1|PIK3R1|RELN|PTPRD|RIT2|CDKL5|VLDLR|NEURL1|MAP3K13|RAPGEF2|FIG4|ACTR3|RUFY3|SETX|CUX2|CRTC1|FAM98A|NPTN|TMEM30A|CAMK1D|TBC1D24|KIDINS220|KCTD17|CARMIL2|DAB2IP|TRIM67	-1.19492e+16	15.0	0.0	0.0
1	1	0	1	0	-1.42722e+16	-2172348677333850	0.0	-4877307254471460	0.0	R-HSA-9609507	Reactome Gene Sets	Protein localization		-1.42722e+16	9056075783972120	1.26847e+16	ACAA1|ACO2|ABCD1|BCS1L|FXN|HSD17B4|HSPA9|MPV17|OTC|PEX6|PEX7|PEX10|PHYH|PEX2|USP9X|GNPAT|PEX3|PMPCB|PITRM1|PMPCA|SAMM50|DNAJC19	-1.17929e+16	37.0	1.0	1.0
0	0	1	1	1	0.0	0.0	-1.16097e+16	-3.23068e+16	-9217844124101870	R-HSA-373760	Reactome Gene Sets	L1CAM interactions		-1.42642e+16	6.22049e+16	1.13136e+16	ACTB|AP2A1|ANK2|CLTC|CNTN1|CSNK2B|DCX|DLG4|DNM1|DPYSL2|GAP43|KCNQ2|KCNQ3|L1CAM|NCAM1|NRCAM|RPS6KA3|SCN1A|SCN2A|SCN8A|SH3GL2|SPTB|SPTBN1|SPTBN2|TUBB2A|TUBB4A|NFASC|SCN3B	-1.19409e+16	30.0	0.0	0.0
1	0	0	0	0	-1.42152e+16	0.0	0.0	0.0	0.0	WP4803	WikiPathways	Ciliopathies		-1.42152e+16	8438616071428570	1.24102e+16	NPHP1|USP9X|OFD1|KIAA0586|PIBF1|RPGRIP1L|ATXN10|TCTN3|IFT172|PIK3R4|TMEM216|AHI1|MKS1|POMGNT1|CC2D2A|CPLANE1|TMEM231|TCTN1|TCTN2|CEP290|TMEM67|TTBK2|ARL13B	-1.17474e+16	22.0	0.0	0.0
1	1	0	1	1	-9599169373376220	-2165849681988660	0.0	-1.05912e+16	-2254006690353840	hsa05016	KEGG Pathway	Huntington disease		-1418068768511020	3.8878e+16	1.00669e+16	AP2A1|ATP5F1B|CLTC|CREBBP|DLG4|MTOR|GRIA2|GRIA3|GRIN1|HTT|ITPR1|KCNJ10|KIF5A|MAP3K10|ATP6|ND6|NDUFA10|NDUFS1|NDUFS2|NDUFS3|NDUFV1|NDUFS4|NDUFS8|POLR2A|PSMA7|PSMC4|PSMC5|PSMC6|PSMD1|PSMD2|PSMD3|SDHA|TBP|TUBB2A|UQCRC1|UQCRC2|VDAC2|ATG13|PSMD6|TUBB4A|PLCB1|PIK3R4|ATG2B|ACTR10|NDUFS7	-1.18656e+16	9.0	0.0	0.0
0	1	1	0	1	0.0	-4192459656355580	-9143388492657830	0.0	-4.73506e+16	GO:0032535	GO Biological Processes	regulation of cellular component size	19_GO:0065007 biological regulation	-1.40359e+16	3598378010878010	9833614326202510	ADD1|ADD2|CAPZB|CDH4|CLCN6|CLN3|MEGF8|DMTN|CLN8|PTK2B|FLII|MTOR|GDI1|ARHGAP35|GSK3B|L1CAM|MAG|MAP1B|MAPT|NRCAM|PAFAH1B1|PIK3R2|SLIT1|SPTB|SPTBN1|SPTBN2|CDKL5|TNR|XK|MAP3K13|WASHC5|SLC12A6|SEMA6B|ARFGEF1|DSTN|CIT|ABCB8|RUFY3|WDTC1|SPART|ATP13A2|CYFIP2|TMOD2|LARS1|SLC12A9|RTN4|SLC12A5|SHANK3|CARMIL2	-1.17247e+16	38.0	1.0	1.0
1	0	0	1	0	-1.39937e+16	0.0	0.0	-2.73765e+16	0.0	GO:0033108	GO Biological Processes	mitochondrial respiratory chain complex assembly	19_GO:0009987 cellular process	-1.39937e+16	1.20313e+16	1.36165e+16	BCS1L|NDUFA10|NDUFS1|NDUFS2|NDUFS3|NDUFS4|NDUFS8|SURF1|AIFM1|SAMM50|ACAD9|TTC19|FOXRED1|NUBPL|NDUFAF2|COX20|NDUFAF6|NDUFS7	-1.15536e+16	18.0	0.0	0.0
1	1	0	1	1	-1.3761e+16	-255556091133292	0.0	-4319662863071630	-5093337592423630	GO:0044242	GO Biological Processes	cellular lipid catabolic process	19_GO:0008152 metabolic process	-1.39374e+16	4794286024855970	1.04848e+16	ACAA1|ACAT1|ABCD1|ASAH1|AUH|CRAT|ECHS1|ETFDH|GALC|GBA1|GCDH|HEXA|HEXB|HSD17B4|NEU1|PCCA|PCCB|PEX7|PHYH|PPT1|PEX2|SMPD1|ABHD16A|PLA2G6|PNPLA6|ILVBL|SLC27A4|MGLL|PLCB1|DDHD2|ABHD12|SMPD3|ABHD6|SRD5A3|PLBD2	-1.16302e+16	39.0	1.0	1.0
1	1	0	1	1	-9911678945813060	-5018016899801710	0.0	-301368647101974	-3.5674e+16	GO:0072594	GO Biological Processes	establishment of protein localization to organelle	19_GO:0051179 localization	-1.38893e+16	3625654345654340	9796219606690320	BCS1L|SCARB2|CSE1L|TIMM8A|KPNA1|LAMP1|LAMP2|NF1|PEX6|PEX7|PEX10|PIK3R1|PEX2|SORT1|SEC13|SRP54|SRPRA|RAB7A|NUP214|STAM|USP9X|PEX3|SQSTM1|AP3D1|AIFM1|PMPCB|NUP155|POM121|BCAP31|PITRM1|PMPCA|VPS13A|SAMM50|PTPN23|VPS41|CHMP4A|TNPO2|PIK3R4|IPO11|VPS13C|SEC61A2|VPS13D|NUP133|CACNG8|SPG11|GNPTG|DNAJC19|POM121C	-1.15861e+16	7.0	0.0	0.0
1	1	0	1	1	-9967373658645820	-3778971952971810	0.0	-5526769632514110	-603230053288442	GO:0031329	GO Biological Processes	regulation of cellular catabolic process	19_GO:0008152 metabolic process	-1.38666e+16	2.73487e+16	9180918003840920	ABCA2|ABCD1|APP|ATM|ATP6V1A|ATP6V0C|ATP6V0A1|CAPN1|CLN3|DKC1|EEF1A2|EIF4G2|ERCC4|MTOR|GBA1|GFAP|GRSF1|GSK3B|HTT|ITPR1|MAPT|MLH1|NPC1|NRDC|PARN|PIK3R2|CTSA|PSAP|PSEN1|UCHL1|EPM2A|FXR1|NPRL3|ADAM9|SQSTM1|ATP6V0D1|AIFM1|TMEM59|FEZ2|PUM1|RUBCN|ATG13|LRPPRC|RRAGB|SPTLC1|CAMKK2|USP20|WDR45|CNOT1|MTCL1|PUM2|UFL1|ATP13A2|UBQLN2|UBQLN1|PIK3R4|EXOSC3|ATP6V1D|NBAS|ATP6V1H|VPS13C|SAMD4B|VPS13D|VPS35|EXOC1|SC…	-1.15673e+16	31.0	0.0	0.0
1	0	0	1	1	-7908880827414400	0.0	0.0	-4682002332805080	-1.20959e+16	GO:0007041	GO Biological Processes	lysosomal transport	19_GO:0051179 localization	-1.38203e+16	5764472369735520	1.09183e+16	SCARB2|LYST|CLN3|GRN|IGF2R|LAMP1|LAMP2|LIPA|LRP1|NPC1|PSAP|SORT1|VCP|RAB7A|AP3D1|ATP13A2|VPS41|CHMP4A|PIK3R4|ANKFY1|CHMP5|ARL8B|VPS35|VPS11|CACNG8|AKTIP|VPS16|GNPTG|C9orf72	-1.15248e+16	29.0	0.0	0.0
1	0	0	1	1	-1.38094e+16	0.0	0.0	-9851328992965850	-2716480083572740	GO:0006518	GO Biological Processes	peptide metabolic process	19_GO:0008152 metabolic process	-1.38094e+16	4737468671679190	1046896972839320	AARS1|APEH|TPP1|CLN5|EIF2B1|EPRS1|GSS|LTA4H|NARS1|NCBP1|PSEN1|PSEN2|RARS1|TUFM|EIF2B4|EIF2B3|EIF2B2|EIF2B5|NPEPPS|SKIC3|GCN1|COPS5|TCF25|NCSTN|HARS2|LARS1|DHX29|PTCD3|DARS2|IARS2|VARS2|AARS2|TARS2|HM13|GFM1|MTFMT	-1.13953e+16	8.0	0.0	0.0
1	1	0	1	0	-1.08865e+16	-2510951765066830	0.0	-1.37469e+16	0.0	GO:0015980	GO Biological Processes	energy derivation by oxidation of organic compounds	19_GO:0008152 metabolic process	-1.37469e+16	9252972027972020	1254153938798360	ACLY|ACO2|ATP5F1B|DLAT|GBE1|GFPT1|MDH2|ND6|NDUFS1|NDUFS2|NDUFV1|OGDH|PDHA1|PDHB|PHKB|SDHA|UQCRC1|UQCRC2|SUCLA2|PTGES3|PANK2	-1.13477e+16	35.0	0.0	0.0
0	0	0	1	1	0.0	0.0	0.0	-5470270215141010	-1.37052e+16	GO:0006885	GO Biological Processes	regulation of pH	19_GO:0042592 homeostatic process	-1.37052e+16	1.6586e+16	1491237073984820	ATP6V0C|ATP6V0A1|ATP6AP1|CLN3|CLN5|GRN|PPT1|UBE3A|ATP6AP2|SLC9A6|DMXL2|CLN6|SLC4A10|SLC12A5|SPNS1	-1.13109e+16	2.0	0.0	0.0
1	0	0	1	0	-9202944779745480	0.0	0.0	-1368189788585480	0.0	hsa05012	KEGG Pathway	Parkinson disease		-1368189788585480	9183400809716590	1.24832e+16	ATP5F1B|GNAL|ND6|NDUFS1|NDUFS2|NDUFV1|PSMA7|PSMC4|PSMC5|PSMC6|PSMD2|SDHA|SLC6A3|TH|UBA1|UQCRC1|UQCRC2|VDAC2|PSMD6|TUBB4A|SLC39A14	-1.12924e+16	40.0	1.0	1.0
1	0	0	1	1	-2.99035e+16	0.0	0.0	-6511650433784660	-1.36568e+16	GO:0051452	GO Biological Processes	intracellular pH reduction	19_GO:0042592 homeostatic process	-1.36568e+16	2653758408891480	1726246423673280	ATP6V0C|ATP6V0A1|ATP6AP1|CLN3|CLN5|GRN|PPT1|UBE3A|ATP6AP2|DMXL2|CLN6|SLC12A5	-1.12803e+16	2.0	0.0	0.0
1	1	0	1	1	-764646387747313	-4235795255157410	0.0	-3547154708929160	-1.025e+16	GO:0006644	GO Biological Processes	phospholipid metabolic process	19_GO:0008152 metabolic process	-1.36037e+16	3564547811738820	96508668615091	ABCA2|ABCA3|ATM|CLN3|DGKB|CLN8|HEXB|MECP2|MVK|PAFAH1B1|PIGA|PIK3R1|PIK3R2|SMPD1|NKX2-1|ABHD16A|PLA2G6|GNPAT|GPAA1|CDS2|SYNJ1|PITPNM1|IP6K1|FIG4|CEPT1|SPTLC1|PNPLA6|PLCB1|PIP5K1C|ABHD12|PIK3R4|PIGT|SMPD3|VAC14|ABHD6|SERINC1|SRD5A3|PIP4K2C|DHDDS|PTDSS2|PITPNM3|PIGO|SERAC1|PIGS|NUS1|FITM2|TTC7B|PLBD2	-1.13159e+16	41.0	1.0	1.0
1	1	0	1	1	-9277984035689290	-2863013069652450	0.0	-471821690352538	-6460126359827080	GO:0008610	GO Biological Processes	lipid biosynthetic process	19_GO:0008152 metabolic process	-1.35653e+16	2.87359e+16	9175335055433050	ABCA2|ACAT1|ACLY|ABCD1|ASAH1|ATM|CLN3|CYP27A1|DGKB|CYB5R3|CLN8|B4GALNT1|GBA1|GCDH|GGTA1|HEXB|LIPA|MVK|PEX7|PIGA|PIK3R1|PIK3R2|PLP1|PPT1|SMPD1|ELOVL4|TM7SF2|PLA2G6|GNPAT|GPAA1|CDS2|SYNJ1|TM9SF2|CYP7B1|PITPNM1|IP6K1|FIG4|CEPT1|SPTLC1|PTGES3|MGLL|PIP5K1C|PIK3R4|ST8SIA3|MECR|PIGT|CYB5R1|VAC14|SERINC1|ELOVL5|FA2H|SRD5A3|PIP4K2C|DHDDS|SCD5|PTDSS2|PITPNM3|TLCD3B|PIGO|SERAC1|PIGS|NUS1|FITM2|TTC7B|SPTSSB	-1.12812e+16	41.0	0.0	0.0
1	1	1	1	1	-2.3482e+16	-26716858568121	-5258569051139900	-259425642877188	-975292050569568	GO:0072657	GO Biological Processes	protein localization to membrane	19_GO:0051179 localization	-1.35389e+16	3170183135921890	9371159000632820	ANK2|ATP6AP1|BCS1L|CDH2|CLN3|CPE|TIMM8A|DLG4|GLRB|GRIK5|NPC1|PALM|RELN|RAB6A|SNAP25|SPTBN1|SRP54|SRPRA|SSR1|STXBP1|THY1|RAB7A|PEX3|SYNGAP1|AP3D1|TM9SF2|NRXN1|NRXN2|NUP155|RAPGEF2|EMC2|TMEM147|ARL6IP5|RER1|SLITRK3|CLSTN1|NFASC|PACS2|NOMO1|SAMM50|NSG1|CHMP4A|TMCO1|SEC61A2|PACS1|VPS35|SCN3B|CCDC47|SIL1|REEP1|SHANK3|MMGT1|STX1B|RAB3C|TTC7B|ARL13B	-1.12585e+16	26.0	0.0	0.0
1	0	0	1	0	-1.08499e+16	0.0	0.0	-1.02109e+16	0.0	GO:0006418	GO Biological Processes	tRNA aminoacylation for protein translation	19_GO:0008152 metabolic process	-1342017238787270	1.09617e+16	1.26555e+16	AARS1|EPRS1|GARS1|NARS1|RARS1|WARS1|FARSB|FARS2|HARS2|LARS1|DARS2|IARS2|VARS2|AARS2|CARS2|NARS2|TARS2	-1114349642974240	8.0	0.0	0.0
1	0	0	1	1	-3.01798e+16	0.0	0.0	-5267558728377190	-1.32699e+16	GO:0035751	GO Biological Processes	regulation of lysosomal lumen pH	19_GO:0042592 homeostatic process	-1.32699e+16	3833206590621030	1916045379006660	ATP6V0C|ATP6V0A1|ATP6AP1|CLN3|CLN5|GRN|PPT1|ATP6AP2|CLN6|SPNS1	-1.09257e+16	2.0	0.0	0.0
1	0	0	1	0	-1072382202868160	0.0	0.0	-1010944566329450	0.0	R-HSA-379724	Reactome Gene Sets	tRNA Aminoacylation		-1.32104e+16	1.07007e+16	1.24735e+16	AARS1|EPRS1|GARS1|NARS1|RARS1|WARS1|FARSB|FARS2|HARS2|LARS1|DARS2|IARS2|VARS2|AARS2|CARS2|NARS2|TARS2	-1.09374e+16	8.0	0.0	0.0
1	0	0	1	1	-8203025570399580	0.0	0.0	-652100503183297	-1.27226e+16	hsa04141	KEGG Pathway	Protein processing in endoplasmic reticulum		-1.31962e+16	4947286631497150	1.02633e+16	AMFR|CALR|CANX|CAPN1|ATF6B|PDIA3|STT3A|ATXN3|EIF2AK2|DNAJC3|RPN2|SEC13|SEL1L|SSR1|HSP90B1|VCP|WFS1|SEC24C|BCAP31|STUB1|SEC23B|MAN1B1|GANAB|UBQLN2|UBQLN1|SAR1B|SEC61A2|UGGT1|SIL1|DNAJC5|SYVN1|STT3B	-1.09268e+16	27.0	0.0	0.0
1	0	1	0	1	-2605489194575150	0.0	-9292065940653370	0.0	-553508424762315	GO:0007409	GO Biological Processes	axonogenesis	19_GO:0032502 developmental process	-1.3174e+16	3.52995e+16	9466392775770730	APLP1|APLP2|APP|CDH4|CHRNB2|CNTN1|CTNNA2|DAB1|FOXG1|GAP43|ARHGAP35|KIF5A|L1CAM|MAP1A|MAP1B|NCAM1|NRCAM|OPHN1|PAFAH1B1|RELN|SLIT1|STXBP1|NKX2-1|TNR|UCHL1|USP9X|KLF7|SYNGAP1|BRSK2|NRXN1|FEZ2|SLC9A6|SEMA6B|AFG3L2|SLITRK3|SPART|NFASC|ZDHHC17|KIFBP|CYFIP2|TCTN1|SPG11|SLC25A46|CNTN4|ARX|C9orf72|ARK2C	-1090819629474620	13.0	0.0	0.0
1	1	0	1	1	-1317268947691710	-2.02628e+16	0.0	-4188909971248880	-4889146450673180	R-HSA-5668914	Reactome Gene Sets	Diseases of metabolism		-1317268947691710	6778004876649450	1.1226e+16	ABCA3|BTD|CYP27A1|DPAGT1|GLB1|GSS|HEXA|HEXB|PNP|PCCB|PMM2|CTSA|EPM2A|CYP7B1|MAN1B1|MMACHC|ALG6|POMGNT1|ALG1|MCCC1|ALG8|SRD5A3|G6PC3|NUS1|NHLRC1	-1.0837e+16	42.0	1.0	1.0
0	1	1	0	1	0.0	-2.14318e+16	-1.31618e+16	0.0	-3.63353e+16	GO:0006887	GO Biological Processes	exocytosis	19_GO:0051179 localization	-1.31618e+16	1.10312e+16	1.29086e+16	BCR|DMTN|SEPTIN5|STXBP1|PPFIA3|CADPS|BRSK2|RIMS2|SNPH|RIMS3|CPLX2|CPLX1|UNC13A|PIP5K1C|SYT3|STX1B|RAB3C|RIMS4	-1.08303e+16	25.0	0.0	0.0
1	0	0	1	0	-1.22847e+16	0.0	0.0	-1.31491e+16	0.0	GO:0009060	GO Biological Processes	aerobic respiration	19_GO:0008152 metabolic process	-1.31491e+16	1.21319e+16	1.327e+16	ACLY|ACO2|ATP5F1B|DLAT|MDH2|ND6|NDUFS1|NDUFS2|NDUFV1|OGDH|PDHA1|PDHB|SDHA|UQCRC1|UQCRC2|SUCLA2|PANK2	-1.08259e+16	35.0	0.0	0.0
1	1	0	1	0	-4253653716681430	-5.72341e+16	0.0	-1.31138e+16	0.0	hsa01200	KEGG Pathway	Carbon metabolism		-1.31138e+16	1517257525083610	1.41795e+16	ACAT1|ACO2|DLAT|GOT2|MDH2|ME2|MMUT|OGDH|PCCA|PCCB|PDHA1|PDHB|SDHA|TKT|SUCLA2	-1079466284726320	35.0	0.0	0.0
1	0	0	1	1	-1.0893e+16	0.0	0.0	-5060955324732230	-4295960070954820	GO:0016042	GO Biological Processes	lipid catabolic process	19_GO:0008152 metabolic process	-1.30994e+16	3842064509884570	9625585218317950	ACAA1|ACAT1|ABCD1|AOAH|ASAH1|AUH|CRAT|CYP27A1|ECHS1|ETFDH|GALC|GBA1|GCDH|HEXA|HEXB|HSD17B4|LIPA|NEU1|PAFAH1B1|PCCA|PCCB|PEX7|PHYH|PPT1|PEX2|SMPD1|RAB7A|ABHD16A|PLA2G6|PNPLA6|ILVBL|SLC27A4|MGLL|PLCB1|DDHD2|ABHD12|SMPD3|ABHD6|SRD5A3|FITM2|PLBD2|PLCXD2	-1.08372e+16	39.0	0.0	0.0
1	0	0	1	1	-3550966792828840	0.0	0.0	-5976462575139520	-1.29518e+16	GO:0007042	GO Biological Processes	lysosomal lumen acidification	19_GO:0042592 homeostatic process	-1.29518e+16	4704389906671270	202343419366175	ATP6V0C|ATP6V0A1|ATP6AP1|CLN3|CLN5|GRN|PPT1|ATP6AP2|CLN6	-1.06407e+16	2.0	0.0	0.0
1	0	0	1	1	-4.84402e+16	0.0	0.0	-5698785430244530	-7869935118460610	GO:0036503	GO Biological Processes	ERAD pathway	19_GO:0050896 response to stimulus	-1284174755860490	6541128974118660	1.08378e+16	AMFR|CALR|CANX|TOR1A|ATXN3|PSMC6|SEL1L|HSP90B1|VCP|WFS1|BRSK2|UBE4A|STUB1|MAN1B1|ECPAS|UBQLN2|UBQLN1|UGGT1|CCDC47|HM13|SYVN1|TMEM67|FBXO44|STT3B	-1058309470460790	27.0	0.0	0.0
1	0	0	1	0	-1.04821e+16	0.0	0.0	-9914575077227440	0.0	GO:0043039	GO Biological Processes	tRNA aminoacylation	19_GO:0008152 metabolic process	-1.28109e+16	1.02143e+16	1.21273e+16	AARS1|EPRS1|GARS1|NARS1|RARS1|WARS1|FARSB|FARS2|HARS2|LARS1|DARS2|IARS2|VARS2|AARS2|CARS2|NARS2|TARS2	-1055574556253260	8.0	0.0	0.0
0	0	1	0	1	0.0	0.0	-1.27855e+16	0.0	-2701023032977130	GO:0031644	GO Biological Processes	regulation of nervous system process	19_GO:0032501 multicellular organismal process	-1.27855e+16	1.44986e+16	1.38118e+16	DLG4|PTK2B|FGF12|SLC8A2|SLC8A3|TNR|NRXN1|NRXN2|RIMS2|MGLL|DLGAP4|CELF4|DLGAP3|SHANK3|STX1B	-1048999169828660	43.0	1.0	1.0
1	0	1	0	1	-569532824417115	0.0	-3.20819e+16	0.0	-1.27691e+16	GO:0051402	GO Biological Processes	neuron apoptotic process	19_GO:0009987 cellular process	-1.27691e+16	1642802824551870	1.43277e+16	APP|ATM|ATN1|CLN8|GBA1|PSEN1|SCN2A|STXBP1|TMBIM6|SYNGAP1|FAIM2|NCSTN|PIGT|DNAJC5	-1.04774e+16	44.0	1.0	1.0
1	0	0	1	0	-1.27411e+16	0.0	0.0	-7814377593909060	0.0	GO:0006399	GO Biological Processes	tRNA metabolic process	19_GO:0008152 metabolic process	-1.27411e+16	7655651693667150	1.14036e+16	AARS1|DDX1|EPRS1|NARS1|RARS1|ELP1|HARS2|EXOSC3|TRNT1|LARS1|DUS2|DARS2|NAT10|ELP2|IARS2|VARS2|AARS2|ELAC2|THADA|TARS2|MTFMT|TSEN54	-1.0457e+16	45.0	1.0	1.0
1	0	0	1	1	-3.67432e+16	0.0	0.0	-2.74611e+16	-954046163664098	GO:0006874	GO Biological Processes	intracellular calcium ion homeostasis	19_GO:0042592 homeostatic process	-1.27098e+16	4494300699300690	9830494142848870	ANK2|APP|ATP2A2|ATP2B1|ATP2B2|ATP2B3|ATP7B|CALR|CLN3|GRIK2|HEXB|ITPR1|PSEN1|RAP1GDS1|SLC8A2|SLC8A3|TMBIM6|HSP90B1|WFS1|XK|BCAP31|AFG3L2|IMMT|PACS2|ATP13A2|NPTN|ATP2C1|TMCO1|CCDC47|THADA|SLC25A23|KCTD17|C19orf12|MICU2	-1.04581e+16	11.0	0.0	0.0
1	0	0	0	0	-1267639488647070	0.0	0.0	0.0	0.0	WP4536	WikiPathways	Genes related to primary cilium development (based on CRISPR)		-1267639488647070	1.11423e+16	1.26429e+16	OFD1|PIBF1|KIFAP3|RPGRIP1L|TCTN3|IFT172|TMEM216|MKS1|CC2D2A|TRAPPC11|CPLANE1|TMEM231|TCTN1|TCTN2|TMEM67|TTBK2|ARL13B	-1.04034e+16	22.0	0.0	0.0
1	0	0	1	1	-3.86592e+16	0.0	0.0	-6378045553565860	-1.26433e+16	GO:0007035	GO Biological Processes	vacuolar acidification	19_GO:0042592 homeostatic process	-1.26433e+16	3.38224e+16	1.7935e+16	ATP6V0C|ATP6V0A1|ATP6AP1|CLN3|CLN5|GRN|PPT1|ATP6AP2|DMXL2|CLN6	-1037389953722490	2.0	0.0	0.0
1	0	0	1	1	-7474840021250770	0.0	0.0	-931094908772021	-4036150955561830	GO:0042176	GO Biological Processes	regulation of protein catabolic process	19_GO:0008152 metabolic process	-1.2631e+16	3.41358e+16	9185450724821190	ABCA2|DDB1|EEF1A2|FHIT|GBA1|GFAP|GSK3B|LRP1|MAP1A|ATXN3|NRDC|OPHN1|PHB1|CTSA|PRKCG|PSEN1|PSMC4|PSMC5|PSMC6|PSMD1|PSMD2|PSMD3|TAF1|VCP|WFS1|RAB7A|USP5|USP9X|CUL4B|ADAM9|PSMF1|BCAP31|PSME3|STUB1|APC2|ZER1|UFL1|ATP13A2|UBQLN2|UBQLN1|VPS35|VPS11|NDFIP1|AGAP2|UBR3|DAB2IP|MFSD8	-1.03828e+16	46.0	1.0	1.0
1	0	0	1	0	-1.03662e+16	0.0	0.0	-982091661485061	0.0	GO:0043038	GO Biological Processes	amino acid activation	19_GO:0008152 metabolic process	-1262035867671550	9987334887334880	1.19624e+16	AARS1|EPRS1|GARS1|NARS1|RARS1|WARS1|FARSB|FARS2|HARS2|LARS1|DARS2|IARS2|VARS2|AARS2|CARS2|NARS2|TARS2	-1037560443223500	8.0	0.0	0.0
1	0	1	0	1	-5575177100483120	0.0	-3148636031587430	0.0	-1.25826e+16	GO:0070997	GO Biological Processes	neuron death	19_GO:0009987 cellular process	-1.25826e+16	1.59401e+16	1.4086e+16	APP|ATM|ATN1|CLN8|GBA1|PSEN1|SCN2A|STXBP1|TMBIM6|SYNGAP1|FAIM2|NCSTN|PIGT|DNAJC5	-1.03204e+16	44.0	0.0	0.0
1	1	0	1	0	-7975761271475080	-3290899129450920	0.0	-1196016763486010	0.0	WP3925	WikiPathways	Amino acid metabolism		-1.25475e+16	6681895028048870	1076285751141660	ACAA1|ACLY|ACO2|AUH|DDC|DLD|EPRS1|GOT2|GSS|MDH2|MMUT|OGDH|OTC|PC|PDHA1|RARS1|SDHA|TH|WARS1|PDHX|FARSB|HIBCH|MCCC1	-1.03062e+16	24.0	0.0	0.0
1	1	0	1	1	-577873339604889	-3.58489e+16	0.0	-6228680703540540	-2.80857e+16	GO:0009896	GO Biological Processes	positive regulation of catabolic process	19_GO:0048518 positive regulation of biological process	-1.25004e+16	2834201826293210	87576350532275	ABCA2|ABCD1|APP|ATM|DDB1|PTK2B|MTOR|GBA1|GRSF1|GSK3B|HTT|LRP1|ATXN3|MLH1|NRDC|PARN|PSEN1|PSMC4|PSMC5|PSMC6|TAF1|VCP|WFS1|RAB7A|EPM2A|USP5|FXR1|NPRL3|CUL4B|ADAM9|SQSTM1|TMEM59|PUM1|ATG13|BCAP31|STUB1|APC2|ZER1|SPTLC1|CAMKK2|USP20|WDR45|CNOT1|UFL1|CCDC22|UBQLN2|UBQLN1|EXOSC3|SAMD4B|VPS13D|VPS35|VPS11|SCOC|FTO|PIP4K2C|NDFIP1|MTDH|UBR3|DAB2IP|C9orf72|TRIM67	-1.02624e+16	31.0	0.0	0.0
1	0	0	1	1	-3773998451150960	0.0	0.0	-54770155832964	-5425899147794590	WP5124	WikiPathways	Alzheimer's disease		-1.24951e+16	3.92032e+16	9431156341505330	ADAM10|APP|ATP2A2|CALM1|CAPN1|CSNK2B|MTOR|GRIN1|GSK3B|ITPR1|KIF5A|LRP1|MAPT|PIK3R1|PIK3R2|EIF2AK2|PSEN1|PSEN2|PSMA7|PSMC4|PSMC5|PSMC6|PSMD1|PSMD2|PSMD3|TUBB2A|VDAC2|NAE1|ATG13|PSMD6|APC2|RTN3|TUBB4A|PLCB1|NCSTN|BACE1|PIK3R4|ATG2B|RTN4	-1.02605e+16	9.0	0.0	0.0
1	1	0	1	0	-1.09299e+16	-3.76395e+16	0.0	-1223353074498430	0.0	GO:0046390	GO Biological Processes	ribose phosphate biosynthetic process	19_GO:0008152 metabolic process	-1248888383911650	430370791998699	9638942552968470	ACAT1|ACLY|ADCY5|ATIC|ATP5F1B|ATP6V1A|ATP6V0C|DLAT|DLD|GART|GCDH|HPRT1|LIPA|ATP6|MTHFD1|ND6|MMUT|NDUFA10|NDUFS1|NDUFS2|NDUFS3|NDUFV1|NDUFS4|NDUFS8|PDHA1|PDHB|PPT1|PRPS1|SDHA|ELOVL4|TKT|PDHX|ELOVL5|PANK2|NDUFS7	-1.02576e+16	18.0	0.0	0.0
1	0	1	0	1	-1.13685e+16	0.0	-2.50703e+16	0.0	-4095928446326940	GO:0010001	GO Biological Processes	glial cell differentiation	19_GO:0032502 developmental process	-1.24536e+16	4406177156177150	967857241954049	ABCA2|APP|CDH2|CNTN1|DAB1|EIF2B1|MTOR|GAP43|GBA1|GFAP|GPM6B|GRN|KCNJ10|LRP1|MAG|MAPT|NF1|NTRK2|PLP1|RELN|PSEN1|SLC8A3|NKX2-1|CUL4B|EIF2B4|EIF2B3|EIF2B2|EIF2B5|TPPP|NCSTN|PRX|FA2H|SLC25A46|DNER	-1022558901139520	28.0	0.0	0.0
1	0	1	0	1	-2408603350046380	0.0	-4807601385695580	0.0	-1.24311e+16	GO:0098657	GO Biological Processes	import into cell	19_GO:0051179 localization	-1.24311e+16	9999669366837490	1.21689e+16	ATP1A3|CACNA1A|CLN8|LIPA|SLC11A2|PSEN1|SCN1A|SCN2A|SCN8A|SLC2A1|SLC6A1|SLC6A5|SLC12A6|SLC9A6|ARL6IP5|SLC39A6|SLC12A9|SLC12A5	-1018295273602150	47.0	1.0	1.0
1	1	0	1	0	-1.08678e+16	-4071741418153290	0.0	-1190461218749850	0.0	GO:0009152	GO Biological Processes	purine ribonucleotide biosynthetic process	19_GO:0008152 metabolic process	-1236371374900080	4497026169706580	9688498170513540	ACAT1|ACLY|ADCY5|ATIC|ATP5F1B|ATP6V1A|ATP6V0C|DLAT|DLD|GART|GCDH|HPRT1|LIPA|ATP6|MTHFD1|ND6|MMUT|NDUFA10|NDUFS1|NDUFS2|NDUFS3|NDUFV1|NDUFS4|NDUFS8|PDHA1|PDHB|PPT1|SDHA|ELOVL4|PDHX|ELOVL5|PANK2|NDUFS7	-1014226058192920	18.0	0.0	0.0
0	1	1	0	1	0.0	-418035684017601	-5103269268809080	0.0	-9355371762990880	GO:0050803	GO Biological Processes	regulation of synapse structure or activity	19_GO:0065007 biological regulation	-1.23578e+16	4058802193656960	9452714165274650	ADAM10|APP|KIF1A|CDH2|CHRNB2|CLN3|CTNNA2|PTK2B|GPM6A|GRID2|NF1|NRCAM|NTRK2|PAFAH1B1|PPT1|PRNP|RELN|PSEN1|PTPRD|SLIT1|CDKL5|UBE3A|VCP|SYNGAP1|NEURL1|NRXN1|CLSTN3|SLITRK3|CLSTN1|CUX2|VPS35|CAMKV|SRCIN1|SHANK3|ARHGAP33|DAB2IP|LRRTM1	-1.01396e+16	48.0	1.0	1.0
1	0	0	1	0	-1.21954e+16	0.0	0.0	-6151678059980260	0.0	GO:0034660	GO Biological Processes	ncRNA metabolic process	19_GO:0008152 metabolic process	-1.21954e+16	441404532967033	9629190696328100	AARS1|DDX1|DKC1|EPRS1|NARS1|NCBP1|PARN|PRKDC|RARS1|ELP1|PUM1|NOP56|TBL3|PWP1|HARS2|UTP20|EXOSC3|TRNT1|LARS1|DUS2|DARS2|NAT10|ELP2|IARS2|VARS2|AARS2|XPO5|ELAC2|THADA|TARS2|WDR75|INTS4|MTFMT|TSEN54	-9960789711320770	45.0	0.0	0.0
1	0	0	0	1	-1.21588e+16	0.0	0.0	0.0	-1.02029e+16	WP4153	WikiPathways	Degradation pathway of sphingolipids, including diseases		-1.21588e+16	3574002100840330	1.75683e+16	SCARB2|GALC|GBA1|GLB1|HEXA|HEXB|NPC1|PSAP|NPC2	-993404823086619	49.0	1.0	1.0
1	1	0	1	1	-9090371651999550	-2.61198e+16	0.0	-4136999180834300	-5955867367118160	GO:1901615	GO Biological Processes	organic hydroxy compound metabolic process	19_GO:0008152 metabolic process	-1.21004e+16	2.99916e+16	8716772657128800	ABCA2|ACAA1|ACLY|ACO2|ALDH2|APP|ASAH1|COMT|CTSB|CYP27A1|DDC|CYB5R3|DPAGT1|CLN8|FECH|GBA1|GCH1|HPRT1|LIPA|MECP2|MVK|NPC1|LGMN|PTS|QDPR|SLC6A3|SLC16A2|SMPD1|SPR|TH|TM7SF2|TTPA|VLDLR|PDXK|SYNJ1|CYP7B1|ABCG1|IP6K1|SPTLC1|NPC2|SCAP|PLCB1|ALG6|RDH11|CYB5R1|CLN6|ALG1|ALG8|SRD5A3|DHDDS|NUS1|MFSD12|SPTSSB|LDHD	-9894836358520240	50.0	1.0	1.0
1	1	0	1	1	-6311573339208030	-2122517227391930	0.0	-722287658126284	-3.16569e+16	GO:0051656	GO Biological Processes	establishment of organelle localization	19_GO:0051179 localization	-1.20666e+16	3.24547e+16	8860958896573980	ATM|KIF1A|CLN3|DNM1|DYNC1H1|TOR1A|HTT|KIF5A|LMNB1|MAP1B|MAPT|MLH1|OPA1|PAFAH1B1|SEPTIN5|PSEN1|RAB1A|RAB6A|SLIT1|UCHL1|RAB7A|CUL3|CDC23|GBF1|SYNJ1|AP3D1|ZW10|SNAP91|LRPPRC|PIBF1|KIF1C|CPLX2|COPS5|COPG1|KIFAP3|SYT11|EXOC6B|TMEM230|CHMP4A|CHMP5|SDAD1|SYBU|EXOC1|TBC1D23|ACTR10|TRAPPC11|SPG11|TRAPPC9	-9864183851313290	16.0	0.0	0.0
1	1	0	1	0	-1.03301e+16	-424379753741164	0.0	-1159138557771170	0.0	GO:0006163	GO Biological Processes	purine nucleotide metabolic process	19_GO:0008152 metabolic process	-1203362121382560	3147269397269390	878632345162494	ACAT1|ACLY|ADCY5|PARP1|ABCD1|ATIC|ATP5F1B|ATP6V1A|ATP6V0C|DLAT|DLD|FHIT|GART|GCDH|HPRT1|HSD17B4|LIPA|MDH2|ATP6|MTHFD1|ND6|MMUT|MVK|NDUFA10|NDUFS1|NDUFS2|NDUFS3|NDUFV1|NDUFS4|NDUFS8|PNP|OGDH|OPA1|PC|PDHA1|PDHB|PPT1|PRPS1|SDHA|ELOVL4|TKT|VCP|PDHX|SUCLA2|PDE10A|NMNAT2|ELOVL5|PANK2|FITM2|NDUFS7	-9834282361044540	18.0	0.0	0.0
0	1	1	0	1	0.0	-4351504504198860	-4452320622651520	0.0	-7258559197526560	GO:0008361	GO Biological Processes	regulation of cell size	19_GO:0065007 biological regulation	-1.20034e+16	4630220062423450	9604029589754260	CDH4|CLCN6|CLN3|MEGF8|CLN8|MTOR|GDI1|ARHGAP35|GSK3B|L1CAM|MAG|MAP1B|MAPT|NRCAM|PAFAH1B1|SLIT1|CDKL5|TNR|XK|MAP3K13|SLC12A6|SEMA6B|ABCB8|RUFY3|WDTC1|SPART|LARS1|SLC12A9|RTN4|SLC12A5|SHANK3	-9807150020671140	38.0	0.0	0.0
1	1	0	1	0	-1.16813e+16	-4032811446410610	0.0	-6925553955998430	0.0	GO:0032787	GO Biological Processes	monocarboxylic acid metabolic process	19_GO:0008152 metabolic process	-1.1875e+16	2.89155e+16	8558951383800850	ACAA1|ACAT1|ACLY|ABCD1|AOAH|ASAH1|AUH|BTD|CRAT|CYP27A1|DLAT|DLD|ECHS1|EPHX1|ETFDH|GCDH|HEXA|HEXB|HSD17B4|LIPA|ME2|MMUT|NPC1|OGDH|PC|PCCA|PCCB|PDHA1|PDHB|PEX7|PHYH|PLP1|PEX2|SLC6A8|ELOVL4|TH|ALDH5A1|PDHX|GNPAT|GRHPR|CYP7B1|PTGES3|ILVBL|SLC27A4|MGLL|ABHD12|ACAD9|MECR|MCCC1|ABHD6|ELOVL5|FA2H|SCD5|PANK2|LDHD|FOXK1	-9684441701783790	39.0	0.0	0.0
1	0	0	1	1	-7851844652662790	0.0	0.0	-594036926451617	-5895423071497190	GO:0016241	GO Biological Processes	regulation of macroautophagy	19_GO:0008152 metabolic process	-11874637175125	4.88328e+16	9672482344371830	ATP6V1A|ATP6V0C|ATP6V0A1|CAPN1|CLN3|MTOR|GBA1|HTT|NPC1|UCHL1|EPM2A|ATP6V0D1|FEZ2|RUBCN|SPTLC1|WDR45|ATP13A2|UBQLN2|UBQLN1|PIK3R4|ATP6V1D|ATP6V1H|VPS13C|VPS13D|VPS35|EXOC1|SCOC|PIP4K2C|C9orf72	-9684441701783790	31.0	0.0	0.0
1	1	0	1	0	-1.17491e+16	-2.53344e+16	0.0	-1186831098423320	0.0	GO:0045333	GO Biological Processes	cellular respiration	19_GO:0008152 metabolic process	-1186831098423320	1.0141e+16	1.19248e+16	ACLY|ACO2|ATP5F1B|DLAT|MDH2|ND6|NDUFS1|NDUFS2|NDUFV1|OGDH|PDHA1|PDHB|SDHA|UQCRC1|UQCRC2|SUCLA2|PANK2	-9662767819050870	35.0	0.0	0.0
1	1	0	1	0	-1.16948e+16	-3.71596e+16	0.0	-1.15853e+16	0.0	GO:0009150	GO Biological Processes	purine ribonucleotide metabolic process	19_GO:0008152 metabolic process	-1.18556e+16	341123392736296	8878469504252630	ACAT1|ACLY|ADCY5|PARP1|ABCD1|ATIC|ATP5F1B|ATP6V1A|ATP6V0C|DLAT|DLD|GART|GCDH|HPRT1|HSD17B4|LIPA|ATP6|MTHFD1|ND6|MMUT|MVK|NDUFA10|NDUFS1|NDUFS2|NDUFS3|NDUFV1|NDUFS4|NDUFS8|PNP|OGDH|OPA1|PDHA1|PDHB|PPT1|SDHA|ELOVL4|VCP|PDHX|SUCLA2|PDE10A|ELOVL5|PANK2|FITM2|NDUFS7	-9668370515037980	18.0	0.0	0.0
1	1	0	1	0	-10945002788672	-4.22214e+16	0.0	-1.04819e+16	0.0	GO:0072522	GO Biological Processes	purine-containing compound biosynthetic process	19_GO:0008152 metabolic process	-1.18459e+16	3.99888e+16	9209222561882830	ACAT1|ACLY|ADCY5|ATIC|ATP5F1B|ATP6V1A|ATP6V0C|DLAT|DLD|GART|GCDH|HPRT1|LIPA|ATP6|MTHFD1|ND6|MMUT|NDUFA10|NDUFS1|NDUFS2|NDUFS3|NDUFV1|NDUFS4|NDUFS8|PNP|PDHA1|PDHB|PPT1|PRPS1|SDHA|ELOVL4|PDHX|NMNAT2|ELOVL5|PANK2|NDUFS7	-9661672956867120	18.0	0.0	0.0
1	1	0	1	0	-1092013921674440	-3.89209e+16	0.0	-1.07579e+16	0.0	GO:0009165	GO Biological Processes	nucleotide biosynthetic process	19_GO:0008152 metabolic process	-1.18359e+16	3.8198e+16	9106524417321600	ACAT1|ACLY|ADCY5|ATIC|ATP5F1B|ATP6V1A|ATP6V0C|DLAT|DLD|GARS1|GART|GCDH|HPRT1|LIPA|ATP6|MTHFD1|ND6|MMUT|NDUFA10|NDUFS1|NDUFS2|NDUFS3|NDUFV1|NDUFS4|NDUFS8|PNP|PDHA1|PDHB|PPT1|PRPS1|SDHA|ELOVL4|PDHX|NMNAT2|RRM2B|ELOVL5|PANK2|NDUFS7	-9654623465196230	18.0	0.0	0.0
1	1	0	1	0	-1.16604e+16	-3.44389e+16	0.0	-1183445999128920	0.0	GO:0019693	GO Biological Processes	ribose phosphate metabolic process	19_GO:0008152 metabolic process	-1183445999128920	6935251198665830	1.0682e+16	ACAT1|ACLY|ATIC|ATP5F1B|ATP6V1A|DLAT|GCDH|HPRT1|ND6|MMUT|NDUFS1|NDUFS2|NDUFV1|OGDH|OPA1|PDHA1|PDHB|SDHA|TKT|SUCLA2|PANK2|FITM2	-963203006153105	35.0	0.0	0.0
0	0	1	0	1	0.0	0.0	-1.0488e+16	0.0	-8116986157208490	R-HSA-445095	Reactome Gene Sets	Interaction between L1 and Ankyrins		-1.17827e+16	1193931874577030	1.20824e+16	ACTB|ANK2|KCNQ2|KCNQ3|L1CAM|NRCAM|SCN1A|SCN2A|SCN8A|SPTB|SPTBN1|SPTBN2|NFASC|SCN3B	-9612009517343700	30.0	0.0	0.0
1	0	0	1	1	-3.2084e+16	0.0	0.0	-2439869210332610	-9738231702810730	GO:0055074	GO Biological Processes	calcium ion homeostasis	19_GO:0042592 homeostatic process	-1.17816e+16	4076199131265210	922407198665886	ANK2|APP|ATP2A2|ATP2B1|ATP2B2|ATP2B3|ATP7B|CALR|CLN3|GRIK2|GRIN1|HEXB|ITPR1|PSEN1|RAP1GDS1|SLC8A2|SLC8A3|TMBIM6|HSP90B1|WFS1|XK|BCAP31|AFG3L2|IMMT|PACS2|ATP13A2|NPTN|ATP2C1|TMCO1|CCDC47|THADA|SLC25A23|KCTD17|C19orf12|MICU2	-9612009517343700	11.0	0.0	0.0
0	1	1	0	1	0.0	-2.98136e+16	-7040083425844480	0.0	-5036574092703210	GO:0090066	GO Biological Processes	regulation of anatomical structure size	19_GO:0065007 biological regulation	-1.17726e+16	2908076923076920	8530218338972950	ADD1|ADD2|ATP2B1|CAPZB|CDH4|CLCN6|CLN3|MEGF8|DMTN|CLN8|EXT2|PTK2B|FLII|MTOR|GCH1|GDI1|ARHGAP35|GSK3B|L1CAM|MAG|MAP1B|MAPT|NRCAM|PAFAH1B1|PIK3R2|RAP1GDS1|SLIT1|SPTB|SPTBN1|SPTBN2|CDKL5|TNR|XK|PLA2G6|PLOD3|MAP3K13|WASHC5|SLC12A6|SEMA6B|ARFGEF1|DSTN|CIT|ABCB8|RUFY3|WDTC1|SPART|ATP13A2|CYFIP2|TMOD2|LARS1|SLC12A9|RTN4|SLC12A5|SHANK3|CARMIL2	-9605884659067050	38.0	0.0	0.0
0	0	1	0	1	0.0	0.0	-5561982748640080	0.0	-1.17571e+16	GO:0098739	GO Biological Processes	import across plasma membrane	19_GO:0051179 localization	-1.17571e+16	1101759978142570	1.21583e+16	ATP1A3|CACNA1A|CLN8|PSEN1|SCN1A|SCN2A|SCN8A|SLC2A1|SLC6A1|SLC6A5|SLC12A6|SLC9A6|ARL6IP5|SLC39A6|SLC12A9|SLC12A5	-9557798500538660	47.0	0.0	0.0
1	1	0	1	0	-1.08529e+16	-3.86736e+16	0.0	-1.07033e+16	0.0	GO:1901293	GO Biological Processes	nucleoside phosphate biosynthetic process	19_GO:0008152 metabolic process	-1173271428014410	3.79098e+16	9047930885055010	ACAT1|ACLY|ADCY5|ATIC|ATP5F1B|ATP6V1A|ATP6V0C|DLAT|DLD|GARS1|GART|GCDH|HPRT1|LIPA|ATP6|MTHFD1|ND6|MMUT|NDUFA10|NDUFS1|NDUFS2|NDUFS3|NDUFV1|NDUFS4|NDUFS8|PNP|PDHA1|PDHB|PPT1|PRPS1|SDHA|ELOVL4|PDHX|NMNAT2|RRM2B|ELOVL5|PANK2|NDUFS7	-9568847745525330	18.0	0.0	0.0
1	0	0	1	1	-3260872343320460	0.0	0.0	-2.85059e+16	-8702662297590490	GO:0032469	GO Biological Processes	endoplasmic reticulum calcium ion homeostasis	19_GO:0042592 homeostatic process	-1.16997e+16	1.32185e+16	1.23581e+16	APP|ATP2A2|ITPR1|PSEN1|RAP1GDS1|TMBIM6|WFS1|BCAP31|PACS2|TMCO1|CCDC47|THADA|KCTD17	-9541517062625370	11.0	0.0	0.0
1	1	0	0	0	-1.16933e+16	-2274130787372890	0.0	0.0	0.0	GO:0030902	GO Biological Processes	hindbrain development	19_GO:0032502 developmental process	-1.16933e+16	827528801843318	1.11349e+16	AARS1|ATIC|DAB1|GART|GBA1|GRID2|MECP2|OPHN1|PSEN1|SPTBN2|XRCC1|GNPAT|RPGRIP1L|NCSTN|AHI1|CEP290|SLC25A46|TTBK2|ARL13B	-9509069179486090	51.0	1.0	1.0
1	1	0	1	0	-6589677006789340	-2.77736e+16	0.0	-1.16728e+16	0.0	R-HSA-71291	Reactome Gene Sets	Metabolism of amino acids and derivatives		-1.16728e+16	6806137479541730	1.05495e+16	ACAT1|AHCY|DDC|DLAT|EPRS1|GCDH|GOT2|OGDH|PDHA1|PDHB|PSMA7|PSMC4|PSMC5|PSMC6|PSMD2|QDPR|TH|PSMF1|PSMD6|PSME3|LARS1|SERINC1	-9497382604517280	52.0	1.0	1.0
1	1	0	1	0	-1.04095e+16	-4351408055373170	0.0	-1074689215649680	0.0	GO:0006164	GO Biological Processes	purine nucleotide biosynthetic process	19_GO:0008152 metabolic process	-1.16687e+16	4040599138852410	9157705814035960	ACAT1|ACLY|ADCY5|ATIC|ATP5F1B|ATP6V1A|ATP6V0C|DLAT|DLD|GART|GCDH|HPRT1|LIPA|ATP6|MTHFD1|ND6|MMUT|NDUFA10|NDUFS1|NDUFS2|NDUFS3|NDUFV1|NDUFS4|NDUFS8|PDHA1|PDHB|PPT1|PRPS1|SDHA|ELOVL4|PDHX|NMNAT2|ELOVL5|PANK2|NDUFS7	-9513294336114180	18.0	0.0	0.0
1	1	0	1	1	-6474325879906570	-3213101104672900	0.0	-1.16654e+16	-2.01991e+16	R-HSA-2262752	Reactome Gene Sets	Cellular responses to stress		-1.16654e+16	457616165560328	9472130865068180	ATP6V1A|CAPZB|TPP1|GFPT1|HSPA9|PSMA7|PSMC4|PSMC5|PSMC6|PSMD2|SSR1|PRDX2|TKT|CUL3|CUL2|SQSTM1|ATP6V0D1|PSMF1|PSMD6|LRPPRC|PSME3|RRAGB|TUBB4A|PTGES3|MINK1|DYNC1LI1|ATP6V1D|ATP6V1H|ACTR10|HM13|COX20	-949290765809669	52.0	0.0	0.0
1	0	0	1	0	-1.16146e+16	0.0	0.0	-1.00101e+16	0.0	R-HSA-72766	Reactome Gene Sets	Translation		-1.16146e+16	5779874021526410	1.00639e+16	AARS1|APEH|EIF2B1|EPRS1|NARS1|RARS1|RPN2|SRP54|SSR1|TUFM|EIF2B4|EIF2B3|EIF2B2|EIF2B5|HARS2|LARS1|PTCD3|DARS2|SEC61A2|IARS2|VARS2|AARS2|TARS2|GFM1|MTFMT	-9450757976803460	8.0	0.0	0.0
1	1	0	1	1	-4697155621217750	-3429980914806150	0.0	-6226772110554200	-4461109345053680	GO:0051648	GO Biological Processes	vesicle localization	19_GO:0051179 localization	-1160688299977110	4478409568573500	9358009949869990	KIF1A|CDH2|CLN3|DNM1|TOR1A|HTT|KIF5A|PAFAH1B1|SEPTIN5|PSEN1|RAB1A|SYN1|RAB7A|CUL3|USO1|GBF1|SYNJ1|BSN|AP3D1|SNAP91|KIF1C|COPS5|KIFAP3|SYT11|EXOC6B|TMEM230|EXOC1|TBC1D23|TRAPPC11|SPG11|TRAPPC9	-9456982121289150	16.0	0.0	0.0
1	1	1	1	1	-3.02901e+16	-3.30572e+16	-720133239074163	-2.0154e+16	-4090953129243110	GO:0050885	GO Biological Processes	neuromuscular process controlling balance	19_GO:0032501 multicellular organismal process	-1.15867e+16	8812354312354310	1.10712e+16	AARS1|ADCY5|APP|BCR|TPP1|CLN3|DLG4|CLN8|HEXA|HEXB|PAFAH1B1|TNR|NRXN1|GPR88|RBFOX1|JPH3|JPH4	-9439544990552010	23.0	0.0	0.0
1	1	0	1	0	-3.01798e+16	-2.89213e+16	0.0	-1.15641e+16	0.0	hsa00020	KEGG Pathway	Citrate cycle (TCA cycle)		-1.15641e+16	3489692307692300	1729701320006660	ACLY|ACO2|DLAT|MDH2|OGDH|PDHA1|PDHB|SDHA|SUCLA2	-9411428809484330	35.0	0.0	0.0
1	1	0	1	0	-1031441416040710	-3862385537080160	0.0	-1141486475003860	0.0	GO:0009260	GO Biological Processes	ribonucleotide biosynthetic process	19_GO:0008152 metabolic process	-1.14965e+16	4194341715976330	916581200101693	ACAT1|ACLY|ADCY5|ATIC|ATP5F1B|ATP6V1A|ATP6V0C|DLAT|DLD|GART|GCDH|HPRT1|LIPA|ATP6|MTHFD1|ND6|MMUT|NDUFA10|NDUFS1|NDUFS2|NDUFS3|NDUFV1|NDUFS4|NDUFS8|PDHA1|PDHB|PPT1|SDHA|ELOVL4|PDHX|ELOVL5|PANK2|NDUFS7	-9354739895135420	18.0	0.0	0.0
1	0	0	0	0	-1.14841e+16	0.0	0.0	0.0	0.0	R-HSA-1852241	Reactome Gene Sets	Organelle biogenesis and maintenance		-1.14841e+16	5701767615830110	9967713866178090	HSPA9|ATP6|NPHP1|TUBB2A|OFD1|GBF1|CKAP5|IMMT|KIFAP3|RPGRIP1L|SAMM50|TCTN3|IFT172|TMEM216|AHI1|MKS1|EXOC1|TWNK|CC2D2A|TCTN1|TCTN2|CEP290|TMEM67|TTBK2|ARL13B	-933967199643231	22.0	0.0	0.0
1	0	0	1	1	-5670260674071140	0.0	0.0	-2582027515678450	-4068204500369420	GO:0010035	GO Biological Processes	response to inorganic substance	19_GO:0050896 response to stimulus	-1.14768e+16	2.79576e+16	8340765847074060	ADD1|PARP1|APP|ATIC|ATP7B|CALM1|CALR|DLG4|DMTN|PTK2B|FXN|GART|GDI1|GLRA1|GSS|HPCA|KCNJ10|LTA4H|MAP1B|MAPT|ND6|MTTP|NPC1|SLC11A2|OTC|PRNP|LGMN|QDPR|SLC6A1|SLC6A3|SMPD1|ABCC8|PRDX2|TH|UBE3A|VCP|BAP1|ADAM9|EIF2B5|CACNA1G|AIFM1|LONP1|ABCB6|SETX|SYT11|PLCB1|NCSTN|ATP13A2|BACE1|ADPRS|DDX19A|SMPD3|SLC30A10|SLC25A23|SYT3|SIRPA|ARL13B	-9337712442500330	53.0	1.0	1.0
1	1	0	1	0	-1.07423e+16	-4271792215013370	0.0	-1071313021766480	0.0	GO:0055086	GO Biological Processes	nucleobase-containing small molecule metabolic process	19_GO:0008152 metabolic process	-1.14556e+16	2762792162792160	831053092988466	ACAT1|ACLY|ADCY5|PARP1|ABCD1|ATIC|ATP5F1B|ATP6V1A|ATP6V0C|DLAT|DLD|DPAGT1|FHIT|MTOR|GARS1|GART|GCDH|GFPT1|HPRT1|HSD17B4|LIPA|MDH2|ALDH6A1|ATP6|MTHFD1|ND6|MMUT|MVK|NDUFA10|NDUFS1|NDUFS2|NDUFS3|NDUFV1|NDUFS4|NDUFS8|PNP|OGDH|OPA1|PC|PDHA1|PDHB|PMM2|PPT1|PRPS1|SDHA|ELOVL4|TKT|VCP|PDHX|SUCLA2|PDE10A|NMNAT2|RRM2B|UGGT1|ELOVL5|PANK2|FITM2|NDUFS7	-9319271202410550	18.0	0.0	0.0
1	1	0	1	1	-5623827990052500	-3.52772e+16	0.0	-7767815409311690	-2.35125e+16	GO:0016197	GO Biological Processes	endosomal transport	19_GO:0051179 localization	-1.14471e+16	3.97123e+16	9027205631322710	ARL1|ATP6AP1|LYST|CLN5|CLTC|RAB6A|SORT1|VCP|RAB7A|STAM|GBF1|SQSTM1|AP3D1|TBC1D5|WASHC5|AP5Z1|ERC1|STX12|PTPN23|NSG1|CCDC22|CHMP4A|ANKFY1|CHMP5|ARL8B|VPS35|TBC1D23|VPS35L|DENND1A|VPS16|TBC1D17|BLTP1|AGAP2|VPS13B|WASHC2A	-9313346666299120	54.0	1.0	1.0
1	0	0	0	0	-1.1418e+16	0.0	0.0	0.0	0.0	GO:0010257	GO Biological Processes	NADH dehydrogenase complex assembly	19_GO:0009987 cellular process	-1.1418e+16	1.46269e+16	1.29556e+16	BCS1L|NDUFA10|NDUFS1|NDUFS2|NDUFS3|NDUFS4|NDUFS8|ACAD9|FOXRED1|NUBPL|NDUFAF2|NDUFAF6|NDUFS7	-9282008941945080	18.0	0.0	0.0
1	0	0	0	0	-1.1418e+16	0.0	0.0	0.0	0.0	GO:0032981	GO Biological Processes	mitochondrial respiratory chain complex I assembly	19_GO:0009987 cellular process	-1.1418e+16	1.46269e+16	1.29556e+16	BCS1L|NDUFA10|NDUFS1|NDUFS2|NDUFS3|NDUFS4|NDUFS8|ACAD9|FOXRED1|NUBPL|NDUFAF2|NDUFAF6|NDUFS7	-9282008941945080	18.0	0.0	0.0
1	1	0	0	1	-1.14131e+16	-3.00872e+16	0.0	0.0	-2.64209e+16	GO:0021549	GO Biological Processes	cerebellum development	19_GO:0032502 developmental process	-1.14131e+16	1.02871e+16	1.16891e+16	AARS1|ATIC|DAB1|GART|GBA1|GRID2|MECP2|OPHN1|PSEN1|SPTBN2|XRCC1|GNPAT|RPGRIP1L|NCSTN|SLC25A46|TTBK2	-9282008941945080	51.0	0.0	0.0
1	0	0	0	1	-1.09714e+16	0.0	0.0	0.0	-3.34425e+16	GO:0021782	GO Biological Processes	glial cell development	19_GO:0032502 developmental process	-1.13828e+16	5665084915084910	9806940439718750	ABCA2|APP|CNTN1|EIF2B1|GFAP|GPM6B|GRN|KCNJ10|LRP1|MAG|MAPT|NF1|NTRK2|PLP1|PSEN1|EIF2B4|EIF2B3|EIF2B2|EIF2B5|TPPP|NCSTN|PRX|FA2H|SLC25A46	-9256911161573550	28.0	0.0	0.0
1	1	0	1	0	-7.96602e+16	-2.28589e+16	0.0	-6016911312677620	0.0	R-HSA-199977	Reactome Gene Sets	ER to Golgi Anterograde Transport		-1.13154e+16	4806738715829620	9390339369248720	ANK2|CAPZB|COPA|COPB1|DYNC1H1|FOLR1|RAB1A|SEC13|SPTB|SPTBN1|SPTBN2|TUBB2A|USO1|GBF1|NAPG|COPB2|GOSR2|SEC24C|TUBB4A|COG5|COPG1|PPP6R1|SAR1B|DYNC1LI1|PPP6R3|ACTR10|TRAPPC9|MIA3	-9197327061446610	10.0	0.0	0.0
1	1	1	1	1	-4419752486044690	-2.8983e+16	-3.79062e+16	-4856177588892630	-3.98244e+16	GO:0010970	GO Biological Processes	transport along microtubule	19_GO:0051179 localization	-1.13127e+16	4646514091968630	9312517973461530	APBA1|APP|KIF1A|CLN3|DYNC1H1|HTT|KIF5A|MAP1A|MAP1B|MAPT|OPA1|PAFAH1B1|RAB1A|RAB6A|SPG7|UCHL1|AP3D1|LRPPRC|KIF1C|COPG1|KIFAP3|KIF1B|MAPK8IP3|IFT172|ARL8B|SYBU|ACTR10|CAMSAP3|SPG11	-9197174628876400	55.0	1.0	1.0
1	0	0	1	1	-5634337097526750	0.0	0.0	-7994942625086370	-5.86117e+16	R-HSA-2132295	Reactome Gene Sets	MHC class II antigen presentation		-1.12872e+16	5373386775825800	9636397417003440	AP2A1|AP1B1|CANX|CAPZB|CLTC|CTSB|CTSD|DNM1|DYNC1H1|KIF3C|KIF5A|CTSA|LGMN|SEC13|SH3GL2|SPTBN2|TUBB2A|RAB7A|CTSF|SEC24C|TUBB4A|KIFAP3|SAR1B|DYNC1LI1|ACTR10	-9176690366401200	56.0	1.0	1.0
0	1	1	0	1	0.0	-4.25035e+16	-5183065165802020	0.0	-7635109026736350	GO:0050807	GO Biological Processes	regulation of synapse organization	19_GO:0050789 regulation of biological process	-1.12843e+16	3.92075e+16	8931223170661990	ADAM10|APP|KIF1A|CDH2|CHRNB2|CLN3|CTNNA2|PTK2B|GPM6A|GRID2|NF1|NRCAM|NTRK2|PAFAH1B1|PRNP|RELN|PSEN1|PTPRD|SLIT1|CDKL5|UBE3A|VCP|NEURL1|NRXN1|CLSTN3|SLITRK3|CLSTN1|CUX2|VPS35|CAMKV|SRCIN1|SHANK3|ARHGAP33|DAB2IP|LRRTM1	-9176254511672700	48.0	0.0	0.0
1	1	0	1	0	-9707695583267570	-3.71832e+16	0.0	-1.1279e+16	0.0	GO:0009117	GO Biological Processes	nucleotide metabolic process	19_GO:0008152 metabolic process	-1.1279e+16	5840489217895070	9933385515114340	ACAT1|ACLY|ATIC|ATP5F1B|ATP6V1A|DLAT|GARS1|GCDH|HPRT1|MDH2|ND6|MMUT|NDUFS1|NDUFS2|NDUFV1|OGDH|OPA1|PDHA1|PDHB|SDHA|TKT|SUCLA2|PANK2|FITM2	-9155770115815220	35.0	0.0	0.0
1	0	1	0	1	-5.76591e+16	0.0	-4159613062234460	0.0	-6239653934461020	GO:0030534	GO Biological Processes	adult behavior	19_GO:0032501 multicellular organismal process	-1.12626e+16	4956949300699300	9437075650998630	APP|CHRNA4|CHRNB2|CSTB|DAB1|CLN8|FGF12|FXN|GLRA1|GLRB|HEXA|KCNJ10|MECP2|NPC1|PAFAH1B1|SEPTIN5|PPT1|SCN1A|SPTBN2|UCHL1|NRXN1|NRXN2|PUM1|NCSTN|ABHD12|PPP1R1B|SHANK3	-9157036551055820	12.0	0.0	0.0
1	0	0	1	1	-5313759880009070	0.0	0.0	-1.1236e+16	-2918709210124770	R-HSA-9824446	Reactome Gene Sets	Viral Infection Pathways		-1.1236e+16	4549794403770930	9272857071587400	AP2A1|AP1B1|ATP1A3|CANX|CLTC|GRSF1|EIF2AK2|PSMA7|PSMC4|PSMC5|PSMC6|PSMD2|RANGAP1|RPN2|TAF1|TUFM|CUL3|PSMF1|PSMD6|PSME3|TUBB4A|PTGES3|YWHAQ|GANAB|DYNC1LI1|CRBN|CHMP5|ATP6V1H|ANO3|VPS16	-9117889699995640	52.0	0.0	0.0
1	1	1	1	1	-5977699268271990	-3.33225e+16	-2.66015e+16	-4372542407393410	-2844726929511650	GO:0021543	GO Biological Processes	pallium development	19_GO:0032502 developmental process	-1.11661e+16	4.31342e+16	9084070908974550	ATIC|ATP1A3|CDH2|DAB1|DLG4|FOXG1|GART|GSK3B|KCNA2|NARS1|NF1|NTRK2|OGDH|PAFAH1B1|RELN|PSEN1|SLC2A1|TH|NKX2-1|TUBB2A|XRCC1|FXR1|EIF2B5|ADGRG1|SEMA6B|PLCB1|POMGNT1|RTN4|TRAPPC9|DAB2IP|ARX	-9065477000343590	6.0	0.0	0.0
1	0	0	1	1	-7177391681525460	0.0	0.0	-8560542932093040	-3.3849e+16	R-HSA-6811442	Reactome Gene Sets	Intra-Golgi and retrograde Golgi-to-ER traffic		-1.1151e+16	4188049574188180	9013952856529660	ARL1|KIF1A|CAPZB|COPA|COPB1|DYNC1H1|IGF2R|KIF3C|KIF5A|MAN2A2|PAFAH1B1|RAB1A|RAB6A|TUBB2A|PLA2G6|GBF1|NAPG|ZW10|COPB2|GOSR2|TUBB4A|COG5|TGOLN2|KIF1C|COPG1|KIFAP3|KIF1B|DYNC1LI1|NBAS|ACTR10|RINT1|SCOC	-9052841299376130	10.0	0.0	0.0
1	1	0	1	0	-1.11461e+16	-3528357435181840	0.0	-1113892922650350	0.0	GO:0009259	GO Biological Processes	ribonucleotide metabolic process	19_GO:0008152 metabolic process	-1.11461e+16	5063169642857140	9509754391038160	ACAT1|PARP1|ABCD1|ATIC|DLD|GART|HSD17B4|ATP6|MTHFD1|MVK|NDUFA10|NDUFS1|NDUFS2|NDUFS3|NDUFV1|NDUFS4|NDUFS8|PNP|OPA1|PDHB|SDHA|ELOVL4|VCP|PDHX|ELOVL5|PANK2|NDUFS7	-9038138887294440	18.0	0.0	0.0
0	0	0	1	0	0.0	0.0	0.0	-1.11432e+16	0.0	GO:0006099	GO Biological Processes	tricarboxylic acid cycle	19_GO:0008152 metabolic process	-1.11432e+16	3.17245e+16	1.64442e+16	ACLY|ACO2|DLAT|MDH2|OGDH|PDHA1|PDHB|SDHA|SUCLA2	-9037664215903930	35.0	0.0	0.0
0	1	1	1	1	0.0	-2.61462e+16	-4752644115349850	-5298670462132990	-6389886703114870	hsa04721	KEGG Pathway	Synaptic vesicle cycle		-1.11242e+16	6778734086426390	1.01321e+16	AP2A1|ATP6V1A|ATP6V0C|ATP6V0A1|CACNA1A|CLTC|DNM1|SLC6A1|SLC6A3|SNAP25|STXBP1|ATP6V0D1|SLC6A5|CPLX2|CPLX1|RIMS1|UNC13A|ATP6V1D|ATP6V1H|STX1B	-902848211329001	57.0	1.0	1.0
1	1	0	1	0	-9518732851752450	-3.64433e+16	0.0	-1110945827626950	0.0	GO:0006753	GO Biological Processes	nucleoside phosphate metabolic process	19_GO:0008152 metabolic process	-1110945827626950	5732554098878530	9804372867006400	ACAT1|ACLY|ATIC|ATP5F1B|ATP6V1A|DLAT|GARS1|GCDH|HPRT1|MDH2|ND6|MMUT|NDUFS1|NDUFS2|NDUFV1|OGDH|OPA1|PDHA1|PDHB|SDHA|TKT|SUCLA2|PANK2|FITM2	-900887357719488	35.0	0.0	0.0
1	0	0	0	1	-6.60875e+16	0.0	0.0	0.0	-4550648225803810	GO:0006979	GO Biological Processes	response to oxidative stress	19_GO:0050896 response to stimulus	-1.10123e+16	3172447552447550	8393315442680520	PARP1|APP|ATM|ATP2A2|CHRNA4|TOR1A|ETFDH|PTK2B|FXN|GSS|MAPT|MPV17|ND6|NDUFS2|NDUFS8|PEX10|PRNP|PSEN1|PTPRN|PEX2|PRDX2|UBE3A|XRCC1|ATRN|PRKRA|ADAM9|SQSTM1|AIFM1|LONP1|SLC23A2|ARL6IP5|CAMKK2|PNKP|SETX|ATP13A2|PYCR2|RRM2B|TMEM161A|ADPRS|SMPD3|TBC1D24|ERMP1|C19orf12|AGAP3|SIRPA	-89238549081786	58.0	1.0	1.0
1	1	0	1	0	-9640815173715270	-3960890571209310	0.0	-1.09831e+16	0.0	GO:0072521	GO Biological Processes	purine-containing compound metabolic process	19_GO:0008152 metabolic process	-1.09831e+16	5945401709401700	9842326071492350	ACAT1|ACLY|ATIC|ATP5F1B|ATP6V1A|DLAT|GCDH|HPRT1|MDH2|ND6|MMUT|NDUFS1|NDUFS2|NDUFV1|OGDH|OPA1|PDHA1|PDHB|SDHA|TKT|SUCLA2|PANK2|FITM2	-889225170618338	35.0	0.0	0.0
1	1	1	1	1	-5497944767278140	-3494997426706080	-2.70514e+16	-3924404167804910	-3.05653e+16	GO:0021987	GO Biological Processes	cerebral cortex development	19_GO:0032502 developmental process	-1096403590122620	5204146247453330	9413535693411350	ATIC|ATP1A3|CDH2|DAB1|DLG4|FOXG1|GART|GSK3B|KCNA2|NARS1|NF1|NTRK2|PAFAH1B1|RELN|PSEN1|SLC2A1|TH|NKX2-1|TUBB2A|ADGRG1|PLCB1|RTN4|TRAPPC9|DAB2IP|ARX	-8882649664192770	6.0	0.0	0.0
0	1	1	0	1	0.0	-2.25574e+16	-1007379812251960	0.0	-5584856114986280	GO:0034762	GO Biological Processes	regulation of transmembrane transport	19_GO:0051179 localization	-1.0849e+16	2.5927e+16	795795661212546	ACTB|ANK2|APP|HCN2|CACNA1A|CALM1|CAPN1|CLCN2|DLG4|PTK2B|FGF12|FGF14|GRIN1|HTT|HPCA|KCNA2|KCNC3|KCND1|KCND2|KCND3|KCNJ10|KCNJ11|KCNQ2|KCNQ3|PDPK1|PIK3R1|PLP1|PRNP|RELN|PSEN1|PSEN2|RTN2|SCN1A|SCN2A|SCN8A|ABCC8|TMBIM6|THY1|PLA2G6|CACNA1I|CACNA1G|CACNA2D2|ARL6IP5|YWHAQ|HECW1|MAPK8IP2|UBQLN1|MINK1|CRBN|CAB39|SCN3B|KCNK12|GJC2|JPH3|CACNG8|THADA|PRRT1|JPH4|SHANK3|UBR3|NALCN	-8776890562598820	59.0	1.0	1.0
1	0	1	0	1	-214788445457761	0.0	-8271718617852520	0.0	-5156368980860990	GO:0051966	GO Biological Processes	regulation of synaptic transmission, glutamatergic	19_GO:0050789 regulation of biological process	-1.07961e+16	6.52767e+16	9877028157105140	CDH2|CLN3|PTK2B|GRIK2|GRIN1|GRM3|OPHN1|RELN|PSEN1|STXBP1|TNR|FXR1|PLA2G6|NRXN1|UNC13A|MAPK8IP2|FRRS1L|RNF167|CACNG8|SHANK3	-8726326117109460	60.0	1.0	1.0
1	1	0	0	1	-1.07919e+16	-2832526763171280	0.0	0.0	-2.47121e+16	GO:0022037	GO Biological Processes	metencephalon development	19_GO:0032502 developmental process	-1.07919e+16	9392546583850930	1.10566e+16	AARS1|ATIC|DAB1|GART|GBA1|GRID2|MECP2|OPHN1|PSEN1|SPTBN2|XRCC1|GNPAT|RPGRIP1L|NCSTN|SLC25A46|TTBK2	-8733419052029190	51.0	0.0	0.0
1	1	0	1	1	-7126129825536410	-2187267554218770	0.0	-6627203775258420	-4479533529481740	WP5323	WikiPathways	Fatty Acids and Lipoproteins Transport in Hepatocytes		-1.07773e+16	3.12249e+16	8266466597831940	ACAA1|ACAT1|ACLY|AP2A1|ABCD1|ANK2|APLP1|APP|AUH|SCARB2|CLN3|CYB5R3|DNM1|DPYSL2|ECHS1|HSD17B4|LIPA|LRP1|MVK|NPC1|OPHN1|PEX7|PEX2|RAB1A|SORT1|SH3GL2|TM7SF2|VLDLR|RAB7A|SYNJ1|RUBCN|ATP9A|NPC2|USP20|SLC27A4|PIP5K1C|ANKFY1|ATP6V1H|OCIAD1|LMBRD1|SERINC1|DENND1A|DNER|C9orf72|MIA3	-8710944334267690	61.0	1.0	1.0
0	0	1	0	1	0.0	0.0	-5237485494385240	0.0	-6.04367e+16	GO:0051960	GO Biological Processes	regulation of nervous system development	19_GO:0032502 developmental process	-1.07762e+16	2.87482e+16	8113325197715540	CDH4|DAB1|DLG4|MEGF8|FOXG1|MTOR|GDI1|GFAP|GRID2|L1CAM|MAG|MAP1B|MAPT|MECP2|NF1|NRDC|NTRK2|PAFAH1B1|RELN|PSEN1|PTPRD|SLIT1|HLTF|CDKL5|ABCC8|THY1|TNR|FXR1|SYNGAP1|SYNJ1|NEURL1|MAP3K13|NRXN1|RAPGEF2|CLSTN3|FIG4|SEMA6B|TPPP|SLITRK3|CLSTN1|RUFY3|KIFAP3|SPART|CUX2|UFL1|NPTN|RTN4|GJC2|TBC1D24|SHANK3|LRRTM1	-8710944334267690	38.0	0.0	0.0
1	1	0	1	1	-6899775587299750	-2.64695e+16	0.0	-5299249730599120	-2.24008e+16	R-HSA-948021	Reactome Gene Sets	Transport to the Golgi and subsequent modification		-1.0759e+16	4287091287091280	889179246463789	ANK2|CAPZB|COPA|COPB1|DYNC1H1|FOLR1|MAN2A2|RAB1A|SEC13|SPTB|SPTBN1|SPTBN2|TUBB2A|USO1|GBF1|NAPG|COPB2|GOSR2|SEC24C|TUBB4A|COG5|COPG1|PPP6R1|ST8SIA3|SAR1B|DYNC1LI1|PPP6R3|ACTR10|TRAPPC9|MIA3	-8696025874903650	10.0	0.0	0.0
1	1	0	1	1	-2897841569572690	-2590475317395470	0.0	-5245831339151470	-6688093471229860	GO:0031647	GO Biological Processes	regulation of protein stability	19_GO:0065007 biological regulation	-1.07349e+16	3.32491e+16	8368102678991290	ANK2|CALR|CREBBP|GRN|HCFC1|HTT|LAMP1|LAMP2|PEX6|PHB1|PIK3R1|CTSA|PRKDC|PRNP|PEX2|SEL1L|STXBP1|TAF1|VBP1|WFS1|USP9X|CUL3|PRKRA|RUVBL1|NAPG|RASSF2|STUB1|CCT7|PTGES3|FAM107A|CCT5|MAPK8IP3|STX12|APTX|VPS35|VPS11|RTN4|MFSD1|SYVN1|WDR81|CCDC88C	-8674191601728470	62.0	1.0	1.0
0	1	1	0	0	0.0	-2205644968112610	-1.0734e+16	0.0	0.0	GO:0051046	GO Biological Processes	regulation of secretion	19_GO:0051179 localization	-1.0734e+16	5469077757685350	9494193389150130	BCR|CHRNA4|CHRNB2|KCNJ11|SEPTIN5|PTPRN|PTPRN2|STXBP1|ABCC8|KLF7|CADPS|BRSK2|RIMS2|RIMS3|CPLX2|CPLX1|HRH3|PLCB1|SMPD3|SYT3|STX1B|RAB3C|RIMS4|RAB15	-8684325698407390	25.0	0.0	0.0
0	1	1	0	1	0.0	-2.9183e+16	-5976302238580920	0.0	-4.28772e+16	GO:0016358	GO Biological Processes	dendrite development	19_GO:0032502 developmental process	-1.07047e+16	5.52775e+16	9432553922621280	APP|RERE|CTNNA2|DAB1|DLG4|CELSR2|HPRT1|MAP1A|MAP1B|MECP2|SLC11A2|RELN|VLDLR|KLF7|SYNGAP1|MAPK8IP2|MINK1|ACTL6B|TBC1D24|SLC12A5|KIDINS220|SHANK3|SLC25A46	-8646128186533140	13.0	0.0	0.0
1	1	0	1	1	-4750316149972950	-3923626629072120	0.0	-7039667193064710	-5103335965565070	GO:0016482	GO Biological Processes	cytosolic transport	19_GO:0051179 localization	-1069089421250900	4696057232241440	9057616055581990	AP2A1|ARL1|KIF1A|CLN3|CLN5|CLTC|KIF5A|LAMP1|RAB6A|SORT1|RAB7A|GBF1|TBC1D5|KIF1C|ERC1|VPS13A|PTPN23|PIK3R4|ANKFY1|VPS13C|ARL8B|VPS35|TBC1D23|AKTIP|TBC1D17|WDR81|WASHC2A	-8640326859070490	54.0	0.0	0.0
1	0	0	1	1	-4.92291e+16	0.0	0.0	-2.31056e+16	-4623252971417880	GO:0010038	GO Biological Processes	response to metal ion	19_GO:0050896 response to stimulus	-1.069e+16	315238690848447	8248187415387240	ADD1|PARP1|APP|ATP7B|CALM1|CALR|DLG4|DMTN|PTK2B|FXN|GDI1|GLRA1|GSS|HPCA|KCNJ10|LTA4H|MAPT|MTTP|NPC1|SLC11A2|OTC|PRNP|LGMN|QDPR|SLC6A1|SLC6A3|SMPD1|ABCC8|TH|ADAM9|EIF2B5|CACNA1G|LONP1|ABCB6|SYT11|NCSTN|ATP13A2|BACE1|DDX19A|SMPD3|SLC30A10|SLC25A23|SYT3|ARL13B	-8640326859070490	53.0	0.0	0.0
0	0	1	0	1	0.0	0.0	-1.0666e+16	0.0	-3969313513022400	R-HSA-6794362	Reactome Gene Sets	Protein-protein interactions at synapses		-1.0666e+16	1.8421e+16	1.35281e+16	APBA1|DLG4|STXBP1|PPFIA4|PPFIA3|NRXN1|NRXN2|DLGAP4|SLITRK3|DLGAP3|LRRTM1	-8631323962440640	63.0	1.0	1.0
0	1	1	0	1	0.0	-2382936923795050	-1.0647e+16	0.0	-3201199034272270	GO:0098815	GO Biological Processes	modulation of excitatory postsynaptic potential	19_GO:0032501 multicellular organismal process	-1.0647e+16	2.88038e+16	1560737172957080	DLG4|PTK2B|SLC8A2|SLC8A3|NRXN1|RIMS2|CELF4|SHANK3|STX1B	-8616502869868980	43.0	0.0	0.0
1	1	1	1	1	-3091997628005370	-2.69828e+16	-3774693725932950	-3.34795e+16	-4.33606e+16	GO:0008088	GO Biological Processes	axo-dendritic transport	19_GO:0051179 localization	-1.06124e+16	6.78789e+16	9883886882553290	APBA1|APP|KIF1A|DYNC1H1|KIF5A|MAP1A|MAPT|OPA1|PAFAH1B1|SPG7|UCHL1|AP3D1|KIF1C|KIF1B|MAPK8IP3|ARL8B|SYBU|ACTR10|SPG11	-856922474900486	55.0	0.0	0.0
1	1	1	0	1	-222130948517675	-3.19079e+16	-6468606060605450	0.0	-7932803209872370	GO:0006816	GO Biological Processes	calcium ion transport	19_GO:0051179 localization	-1.06059e+16	3.63257e+16	848554633013954	ANK2|ATP2A2|ATP2B1|ATP2B2|ATP2B3|CACNA1A|CHRNA4|CHRNB2|GPM6A|GRIN1|ITPR1|PSEN1|PSEN2|SCN1A|SCN2A|SCN8A|SLC8A2|SLC8A3|CACNA1I|CACNA1G|CACNA2D2|PMPCB|AFG3L2|PLCB1|TRPC4AP|ATP2C1|GHITM|SARAF|TMCO1|JPH3|CACNG8|SLC25A23|JPH4|MICU2|NALCN|NALF1	-856485737749015	11.0	0.0	0.0
1	0	1	0	0	-4253105524894840	0.0	-5850164255024850	0.0	0.0	GO:0043254	GO Biological Processes	regulation of protein-containing complex assembly	19_GO:0050789 regulation of biological process	-1.05873e+16	2994077007330010	8110088243221080	ABCA3|ADD1|ADD2|PARP1|ATM|ATR|CAPZB|DMTN|PTK2B|FLII|MTOR|GBA1|GFAP|GSK3B|HCFC1|MAP1B|MAPT|MECP2|PIK3R2|EIF2AK2|PSMC6|SPTB|SPTBN1|SPTBN2|STXBP1|TBCD|VCP|VDAC2|WARS1|CKAP5|STUB1|TUBB4A|ARFGEF1|TPPP|CYFIP2|VPS41|GIT1|TMOD2|SAR1B|CRBN|VPS35|VPS11|CAMSAP3|VPS16|STX1B|CARMIL2|DAB2IP	-8548355350993490	36.0	0.0	0.0
1	0	0	0	0	-1.05853e+16	0.0	0.0	0.0	0.0	R-HSA-5617833	Reactome Gene Sets	Cilium Assembly		-1.05853e+16	6717306325515280	9972184396759520	NPHP1|TUBB2A|OFD1|GBF1|CKAP5|KIFAP3|RPGRIP1L|TCTN3|IFT172|TMEM216|AHI1|MKS1|EXOC1|CC2D2A|TCTN1|TCTN2|CEP290|TMEM67|TTBK2|ARL13B	-8563047338773790	22.0	0.0	0.0
0	0	0	0	1	0.0	0.0	0.0	0.0	-1057102239766970	GO:0006821	GO Biological Processes	chloride transport	19_GO:0051179 localization	-1057102239766970	1.29996e+16	1.20751e+16	CLCN4|CLCN6|CLCN7|GABRA3|GLRA1|GLRB|SLC6A1|SLC12A6|SLC12A9|SLC4A10|SLC12A5|ANO3|TTYH3	-8550844035672	64.0	1.0	1.0
1	0	0	1	0	-963756391606852	0.0	0.0	-8268307462875890	0.0	hsa00970	KEGG Pathway	Aminoacyl-tRNA biosynthesis		-1.0568e+16	7210108073744430	1.00139e+16	AARS1|EPRS1|GARS1|NARS1|RARS1|WARS1|FARSB|FARS2|HARS2|LARS1|DARS2|IARS2|VARS2|AARS2|CARS2|NARS2|TARS2|MTFMT	-8531231292122840	8.0	0.0	0.0
1	1	1	1	0	-6.02641e+16	-3735329444198600	-3136624802962440	-3821449834101420	0.0	GO:0021537	GO Biological Processes	telencephalon development	19_GO:0032502 developmental process	-1056280526581480	3544099016925100	8418575742593440	ATIC|ATP1A3|CDH2|DAB1|DLG4|FOXG1|GART|GSK3B|HPRT1|KCNA2|NARS1|NF1|NTRK2|OGDH|PAFAH1B1|RELN|PSEN1|SLC2A1|TH|NKX2-1|TNR|TUBB2A|XRCC1|FXR1|EIF2B5|ADGRG1|SEMA6B|PLCB1|RPGRIP1L|POMGNT1|RTN4|TCTN1|TRAPPC9|SHANK3|DAB2IP|ARX|ARL13B	-8528114520747510	6.0	0.0	0.0
1	0	0	1	0	-700338461868378	0.0	0.0	-8714104138082630	0.0	R-HSA-8856688	Reactome Gene Sets	Golgi-to-ER retrograde transport		-1050392390517390	4969372732530620	909628513684315	KIF1A|CAPZB|COPA|COPB1|DYNC1H1|KIF3C|KIF5A|PAFAH1B1|RAB1A|RAB6A|TUBB2A|PLA2G6|GBF1|NAPG|ZW10|COPB2|TUBB4A|KIF1C|COPG1|KIFAP3|KIF1B|DYNC1LI1|NBAS|ACTR10|RINT1	-8471336285194440	10.0	0.0	0.0
0	1	1	0	1	0.0	-2274130787372890	-5829854654454450	0.0	-5034685942615660	GO:0050770	GO Biological Processes	regulation of axonogenesis	19_GO:0032502 developmental process	-1048687954285560	4605165801939990	8922081111882190	CDH2|CDH4|DAB1|MEGF8|GDI1|ARHGAP35|GSK3B|L1CAM|MAG|MAP1B|MAPT|NRDC|NTRK2|PAFAH1B1|PSEN1|SLIT1|CDKL5|THY1|TNR|XK|SYNGAP1|BRSK2|MAP3K13|SEMA6B|RUFY3|SPART|RTN4	-8456384912381940	38.0	0.0	0.0
1	1	1	1	1	-4403269779325600	-3139390910866500	-2.66338e+16	-3662804121599590	-3.05012e+16	GO:0030900	GO Biological Processes	forebrain development	19_GO:0032502 developmental process	-1.04549e+16	3.01016e+16	8064937178061720	APLP1|APP|ATIC|ATP1A3|CDH2|CHRNB2|DAB1|DLG4|FOXG1|GART|ARHGAP35|GSK3B|HPRT1|KCNA2|NARS1|NF1|NTRK2|OGDH|OPHN1|PAFAH1B1|RELN|PSEN1|SLC2A1|SLC6A3|SLIT1|TH|NKX2-1|TNR|TUBB2A|XRCC1|FXR1|EIF2B5|ADGRG1|RAPGEF2|SEMA6B|PLCB1|RPGRIP1L|POMGNT1|RTN4|SLC4A10|TCTN1|TRAPPC9|SHANK3|DAB2IP|ARX|ARL13B	-842651872775555	6.0	0.0	0.0
1	0	0	0	1	-6.52027e+16	0.0	0.0	0.0	-1044850955014890	GO:0009100	GO Biological Processes	glycoprotein metabolic process	19_GO:0008152 metabolic process	-1044850955014890	6628022923264040	9875839906154230	AGA|EXT2|HEXA|STT3A|MAN2A2|MANBA|NPC1|PSEN1|RPN2|PLOD3|TMEM59|MAN1B1|GANAB|UGGT1|DHDDS|SYVN1|GNPTG|FBXO44|NUS1|STT3B	-844039569955262	65.0	1.0	1.0
0	0	0	1	1	0.0	0.0	0.0	-1.04286e+16	-3520675222178250	R-HSA-8856828	Reactome Gene Sets	Clathrin-mediated endocytosis		-1.04286e+16	1.11543e+16	1.14528e+16	ACTB|AP2A1|CLTC|TOR1A|STAM|SYNJ1|DNAJC6|ACTR3|COPS8|COPS5|UBQLN2|UBQLN1|COPS7A|COPS4	-8423777088109300	66.0	1.0	1.0
1	0	0	1	0	-1.04279e+16	0.0	0.0	-2831374542081370	0.0	R-HSA-6799198	Reactome Gene Sets	Complex I biogenesis		-1.04279e+16	1.42124e+16	1.22428e+16	NDUFA10|NDUFS1|NDUFS2|NDUFS3|NDUFV1|NDUFS4|NDUFS8|ACAD9|NUBPL|NDUFAF2|NDUFAF6|NDUFS7	-8423777088109300	18.0	0.0	0.0
1	0	0	1	1	-2185936758290300	0.0	0.0	-2.85059e+16	-1.03968e+16	R-HSA-901042	Reactome Gene Sets	Calnexin/calreticulin cycle		-1.03968e+16	3.53834e+16	1.64275e+16	CALR|CANX|PDIA3|SEL1L|MAN1B1|GANAB|UGGT1|SYVN1	-8396528693616690	67.0	1.0	1.0
1	0	0	1	0	-1.03783e+16	0.0	0.0	-6809336403848560	0.0	GO:0043043	GO Biological Processes	peptide biosynthetic process	19_GO:0008152 metabolic process	-1.03783e+16	4.52213e+16	8891363677632190	AARS1|APEH|EIF2B1|EPRS1|GSS|NARS1|NCBP1|RARS1|TUFM|EIF2B4|EIF2B3|EIF2B2|EIF2B5|SKIC3|GCN1|COPS5|TCF25|HARS2|LARS1|DHX29|PTCD3|DARS2|IARS2|VARS2|AARS2|TARS2|GFM1|MTFMT	-8379984609056660	8.0	0.0	0.0
1	0	0	1	0	-1.03756e+16	0.0	0.0	-7254908967032940	0.0	GO:0006412	GO Biological Processes	translation	19_GO:0008152 metabolic process	-1.03756e+16	468570969518913	8971392279385860	AARS1|APEH|EIF2B1|EPRS1|NARS1|NCBP1|RARS1|TUFM|EIF2B4|EIF2B3|EIF2B2|EIF2B5|SKIC3|GCN1|COPS5|TCF25|HARS2|LARS1|DHX29|PTCD3|DARS2|IARS2|VARS2|AARS2|TARS2|GFM1|MTFMT	-8379174895048430	8.0	0.0	0.0
1	0	0	0	0	-1.03662e+16	0.0	0.0	0.0	0.0	GO:0014003	GO Biological Processes	oligodendrocyte development	19_GO:0032502 developmental process	-1.03662e+16	1650218253968250	1276072299311540	ABCA2|EIF2B1|KCNJ10|MAG|PLP1|EIF2B4|EIF2B3|EIF2B2|EIF2B5|NCSTN|FA2H	-837364045860438	28.0	0.0	0.0
1	1	0	1	1	-1.03539e+16	-2991043965561280	0.0	-5664701346192520	-3061825292534730	R-HSA-556833	Reactome Gene Sets	Metabolism of lipids		-1.03539e+16	3.45268e+16	8300206953142310	ACAA1|ACAT1|ABCD1|ASAH1|CYP27A1|ECHS1|GALC|B4GALNT1|GBA1|GLB1|HEXA|HEXB|HSD17B4|LTA4H|MVK|PCCB|PHYH|CTSA|PSAP|SMPD1|ELOVL4|TM7SF2|PLA2G6|GNPAT|CYP7B1|SEC24C|MED24|FIG4|SPTLC1|PNPLA6|SCAP|DDHD2|PIK3R4|SAR1B|ELOVL5|FA2H|SRD5A3|PTDSS2	-8363230471926320	39.0	0.0	0.0
1	0	0	1	0	-5356618031334010	0.0	0.0	-1.02836e+16	0.0	R-HSA-8951664	Reactome Gene Sets	Neddylation		-1.02836e+16	8071397174254310	1.03488e+16	PSMA7|PSMC4|PSMC5|PSMC6|PSMD2|CUL3|CUL2|SQSTM1|PSMF1|PSMD6|PSME3|COPS8|COPS5|COPS7A|COPS4|DCAF17|UBE2F	-8300554114286710	52.0	0.0	0.0
1	1	0	1	1	-9113453613147000	-2036766664442770	0.0	-2.68153e+16	-5955473936117590	GO:0006066	GO Biological Processes	alcohol metabolic process	19_GO:0008152 metabolic process	-1.02399e+16	3.26383e+16	8122980668592810	ABCA2|ACLY|ACO2|ALDH2|APP|ASAH1|CYP27A1|CYB5R3|DPAGT1|CLN8|FECH|GBA1|GCH1|LIPA|MECP2|MVK|NPC1|PTS|QDPR|SMPD1|SPR|TM7SF2|VLDLR|SYNJ1|CYP7B1|ABCG1|IP6K1|SPTLC1|NPC2|SCAP|PLCB1|ALG6|RDH11|CLN6|ALG1|ALG8|SRD5A3|DHDDS|NUS1|SPTSSB	-8225804779975810	50.0	0.0	0.0
1	1	1	1	1	-2.71702e+16	-2.1451e+16	-2.235e+16	-3.62091e+16	-4742738619799910	GO:1903829	GO Biological Processes	positive regulation of protein localization	19_GO:0051179 localization	-1.02349e+16	2812453503942860	7851925378017120	PARP1|CLN3|CREBBP|DKC1|DLG4|GSK3B|HPCA|ITPR1|LRP1|MAP1A|MAPT|PDPK1|PIK3R1|PIK3R2|PRNP|PSEN1|SPTBN1|ABCC8|VRK1|BAP1|PLA2G6|ADAM9|SQSTM1|NPEPPS|ABCG1|CLSTN3|ATG13|HUWE1|BCAP31|CCT7|RER1|RUFY3|CCT5|SYT11|PLCB1|MTCL1|ATP13A2|PTPN23|NPTN|ATP2C1|SAR1B|VPS35|TMEM30A|EXOC1|VPS11|DMAP1|RTN4|TMEM35A|XPO4|CEP290	-8222807687666860	68.0	1.0	1.0
1	1	0	1	1	-6.06393e+16	-3394094401724010	0.0	-2.88439e+16	-5762297064794090	GO:0008654	GO Biological Processes	phospholipid biosynthetic process	19_GO:0008152 metabolic process	-1.02225e+16	3.68385e+16	8345876780707850	ATM|CLN3|DGKB|HEXB|MVK|PIGA|PIK3R1|PIK3R2|PLA2G6|GNPAT|GPAA1|CDS2|SYNJ1|PITPNM1|IP6K1|FIG4|CEPT1|SPTLC1|PIP5K1C|PIK3R4|PIGT|VAC14|SERINC1|SRD5A3|PIP4K2C|DHDDS|PTDSS2|PITPNM3|PIGO|SERAC1|PIGS|NUS1|FITM2|TTC7B	-8214365614764100	41.0	0.0	0.0
1	0	0	1	0	-8201826126813020	0.0	0.0	-4955006204390580	0.0	GO:0044283	GO Biological Processes	small molecule biosynthetic process	19_GO:0008152 metabolic process	-1.01959e+16	2.84082e+16	7853317303793280	ABCA2|ACLY|ABCD1|ASAH1|CYP27A1|CYB5R3|GBA1|GCH1|GGTA1|GOT2|HPRT1|LIPA|LTA4H|MDH2|MTHFD1|MVK|PNP|OTC|PC|PLP1|PRPS1|PTS|QDPR|SPR|ELOVL4|TM7SF2|SLC25A11|PDXK|SUCLA2|PLOD3|CYP7B1|IP6K1|SPTLC1|PTGES3|SERINC3|ILVBL|MGLL|SLC39A14|PYCR2|MECR|COQ8A|ELOVL5|FA2H|SRD5A3|DHDDS|SCD5|G6PC3|NUS1|SPTSSB	-8189742824647760	69.0	1.0	1.0
1	1	1	0	1	-2.01997e+16	-2443073477153210	-344578802485034	0.0	-6022569547610110	GO:0008306	GO Biological Processes	associative learning	19_GO:0032501 multicellular organismal process	-1.01856e+16	6077485732658140	9403579976100820	APP|CHRNB2|CLN3|CLN8|GRIN1|MAP1A|MECP2|NF1|PPT1|LGMN|RELN|SLC6A1|SNAP25|ABCC8|TNR|SYNGAP1|DDHD2|NPTN|CSMD1|PPP1R1B	-8181395781456380	70.0	1.0	1.0
1	0	0	1	1	-2.97158e+16	0.0	0.0	-3.24259e+16	-7571839769731410	GO:0030433	GO Biological Processes	ubiquitin-dependent ERAD pathway	19_GO:0050896 response to stimulus	-1.01786e+16	6439797382105070	9537841787766700	AMFR|CALR|CANX|PSMC6|SEL1L|HSP90B1|VCP|WFS1|UBE4A|STUB1|MAN1B1|ECPAS|UBQLN2|UBQLN1|CCDC47|SYVN1|TMEM67|FBXO44|STT3B	-8176397283397640	27.0	0.0	0.0
1	0	0	0	0	-8695848608864530	0.0	0.0	0.0	0.0	GO:0048709	GO Biological Processes	oligodendrocyte differentiation	19_GO:0032502 developmental process	-1007469530205890	6358280959546780	9455104110301220	ABCA2|CNTN1|EIF2B1|MTOR|GPM6B|KCNJ10|MAG|NF1|NTRK2|PLP1|SLC8A3|NKX2-1|EIF2B4|EIF2B3|EIF2B2|EIF2B5|TPPP|NCSTN|FA2H	-8076385354956660	28.0	0.0	0.0
1	1	1	1	1	-2.94265e+16	-2594472171788290	-5.8741e+16	-2.31497e+16	-2.29748e+16	GO:0140056	GO Biological Processes	organelle localization by membrane tethering	19_GO:0051179 localization	-1007469530205890	6358280959546780	9455104110301220	ATP2A2|CALM1|CLN3|PSEN2|SNAP25|STXBP1|STX7|PPFIA3|USO1|SNPH|CPLX2|UNC13A|EXOC6B|PACS2|STX12|EXOC1|VPS11|STX1B|RAB3C	-8076385354956660	71.0	1.0	1.0
1	0	0	1	1	-3.44451e+16	0.0	0.0	-2098410246238380	-432612389612149	GO:0080135	GO Biological Processes	regulation of cellular response to stress	19_GO:0050896 response to stimulus	-1.0056e+16	2417102897102890	7521331163670060	ACTB|PARP1|ABCD1|AMFR|APP|ATM|ATR|CLN3|CREBBP|ATF6B|ERCC4|PTK2B|FECH|MTOR|GCH1|GRN|GSK3B|MAPT|ATXN3|MAP3K10|OPA1|PAFAH1B1|PIK3R1|PRKCG|PRKDC|EIF2AK2|ATXN7|TMBIM6|THY1|TNR|TPD52L1|WFS1|XRCC1|RUVBL1|RASSF2|PJA2|TRAP1|BCAP31|ARL6IP5|SERINC3|COPS5|PNKP|RNF13|MAPK8IP3|PLCB1|UFL1|MAPK8IP2|BABAM1|UBQLN2|UBQLN1|MINK1|ACTL6B|VPS13C|TMEM161A|DMAP1|TBC1D24|ARID1B|WDR48|MMS19|SLC25A23|SYVN1|SIRPA|DAB2IP|RNF1…	-8059672144233470	72.0	1.0	1.0
1	1	1	1	1	-2.67602e+16	-2.40772e+16	-5523529943253480	-2.98217e+16	-2.11581e+16	GO:0022406	GO Biological Processes	membrane docking	19_GO:0009987 cellular process	-9994235831698920	5.94091e+16	9255534371785190	ATP2A2|CALM1|CLN3|PSEN2|SNAP25|STXBP1|RAB7A|STX7|PPFIA3|USO1|SNPH|CPLX2|UNC13A|EXOC6B|PACS2|STX12|EXOC1|VPS11|STX1B|RAB3C	-800170372345559	71.0	0.0	0.0
0	1	1	0	0	0.0	-2519989217564840	-9961209005686960	0.0	0.0	GO:1903530	GO Biological Processes	regulation of secretion by cell	19_GO:0051179 localization	-9961209005686960	5529527133715610	9153339666901330	BCR|CHRNA4|CHRNB2|KCNJ11|SEPTIN5|STXBP1|ABCC8|KLF7|CADPS|BRSK2|RIMS2|RIMS3|CPLX2|CPLX1|HRH3|PLCB1|SMPD3|SYT3|STX1B|RAB3C|RIMS4|RAB15	-8008850387346240	25.0	0.0	0.0
1	1	0	1	0	-9930711073687340	-5889773358721240	0.0	-2.80219e+16	0.0	GO:0009081	GO Biological Processes	branched-chain amino acid metabolic process	19_GO:0008152 metabolic process	-9930711073687340	2.2503e+16	1.37065e+16	ACAT1|AUH|BCKDHB|DLD|ECHS1|PCCB|ILVBL|HIBCH|MCCC1	-7980093116922920	73.0	1.0	1.0
0	1	1	1	0	0.0	-4136235957933360	-2.76718e+16	-421907910931277	0.0	R-HSA-9716542	Reactome Gene Sets	Signaling by Rho GTPases, Miro GTPases and RHOBTB3		-9922249224443000	2380067992948870	7441751213877460	ACTB|ARHGDIG|ATP6AP1|BCR|CALM1|CAPZB|CLTC|CPD|DLG4|DYNC1H1|DOCK3|PTK2B|GPS1|RAPGEF1|ARHGAP35|KIF5A|LMNB1|NDUFS3|OPHN1|PAFAH1B1|PDPK1|PIK3R1|PIK3R2|RANGAP1|RAP1GDS1|SEC13|SPTBN1|TUBB2A|VCP|YWHAG|RAB7A|STAM|AAAS|USP9X|CUL3|ZW10|TMEM59|CDC42BPB|CKAP5|SRGAP3|ACTR3|BCAP31|TUBB4A|CCT7|YWHAQ|CIT|NISCH|SLITRK3|MCF2L|DOCK9|SAMM50|CYFIP2|GIT1|PIK3R4|COPS4|DYNC1LI1|ANKFY1|NUP133|PAK6|PAK5|KIDINS220|ARHGAP39…	-7.93163e+16	74.0	1.0	1.0
1	1	0	1	0	-7847827395251760	-4804049832633700	0.0	-9914575077227440	0.0	WP4577	WikiPathways	Neurodegeneration with brain iron accumulation (NBIA) subtypes pathway		-9914575077227440	2.37934e+16	1.40892e+16	CP|FTL|PLA2G6|WDR45|ATP13A2|FA2H|PANK2|DCAF17|C19orf12	-7969137632966800	75.0	1.0	1.0
1	1	1	0	1	-2341259338999400	-3.05142e+16	-4725413945356050	0.0	-7299036404111970	GO:0070588	GO Biological Processes	calcium ion transmembrane transport	19_GO:0051179 localization	-9914528693883660	3.8658e+16	8302333404204830	ATP2A2|ATP2B1|ATP2B2|ATP2B3|CACNA1A|GPM6A|GRIN1|ITPR1|PSEN1|SCN1A|SCN2A|SCN8A|SLC8A2|SLC8A3|CACNA1I|CACNA1G|CACNA2D2|PMPCB|AFG3L2|PLCB1|TRPC4AP|ATP2C1|GHITM|TMCO1|JPH3|CACNG8|SLC25A23|JPH4|MICU2|NALCN|NALF1	-7925806210787090	11.0	0.0	0.0
1	0	0	1	1	-214788445457761	0.0	0.0	-518886450412382	-9908104545450910	GO:0072665	GO Biological Processes	protein localization to vacuole	19_GO:0051179 localization	-9908104545450910	1.56168e+16	1.23374e+16	SCARB2|LAMP2|SORT1|VPS13A|VPS41|VPS13C|LMBRD1|RTN4|CACNG8|MFSD1|GNPTG	-7.96609e+16	76.0	1.0	1.0
1	1	1	1	0	-2.01394e+16	-4249919919435240	-2852961395500960	-3.83448e+16	0.0	R-HSA-194315	Reactome Gene Sets	Signaling by Rho GTPases		-9902146965153120	2396560946136010	7444759164688680	ACTB|ARHGDIG|ATP6AP1|BCR|CALM1|CAPZB|CLTC|CPD|DLG4|DYNC1H1|DOCK3|PTK2B|GPS1|RAPGEF1|ARHGAP35|KIF5A|LMNB1|NDUFS3|OPHN1|PAFAH1B1|PDPK1|PIK3R1|PIK3R2|RANGAP1|SEC13|SPTBN1|TUBB2A|VCP|YWHAG|RAB7A|STAM|AAAS|USP9X|CUL3|ZW10|TMEM59|CDC42BPB|CKAP5|SRGAP3|ACTR3|BCAP31|TUBB4A|CCT7|YWHAQ|CIT|NISCH|SLITRK3|MCF2L|DOCK9|SAMM50|CYFIP2|GIT1|PIK3R4|COPS4|DYNC1LI1|ANKFY1|NUP133|PAK6|PAK5|KIDINS220|ARHGAP39|ARHGAP33…	-7915316835734250	74.0	0.0	0.0
1	0	0	0	0	-9867045332546510	0.0	0.0	0.0	0.0	WP5316	WikiPathways	Primary ovarian insufficiency		-9867045332546510	6983682266009850	9706192346272190	PARP1|ATM|BCKDHB|COX10|MTOR|HSD17B4|PCCB|PMM2|XRCC4|EIF2B4|EIF2B3|EIF2B2|EIF2B5|HARS2|TWNK|AARS2|XPO5|SIL1	-792842049044135	77.0	1.0	1.0
0	0	0	0	1	0.0	0.0	0.0	0.0	-9857951804499200	GO:1902476	GO Biological Processes	chloride transmembrane transport	19_GO:0051179 localization	-9857951804499200	1.31424e+16	1167354671863320	CLCN4|CLCN6|CLCN7|GABRA3|GLRA1|GLRB|SLC6A1|SLC12A6|SLC12A9|SLC12A5|ANO3|TTYH3	-7921013545025970	64.0	0.0	0.0
0	1	1	0	1	0.0	-5915444358236880	-3.46094e+16	0.0	-6724558452810350	WP4312	WikiPathways	Rett syndrome causing genes		-984282799843106	8261582167832160	9982886162184020	FOXG1|GABRA3|GNAO1|HTT|KCNJ10|MECP2|SCN1A|SCN2A|SCN8A|CDKL5|STXBP1|SYNGAP1|EIF2B2|ACTL6B|SHANK3	-7862639199544370	78.0	1.0	1.0
1	1	0	1	1	-3.40229e+16	-2.29037e+16	0.0	-5408015177010950	-9492077677234	GO:0006897	GO Biological Processes	endocytosis	19_GO:0051179 localization	-9841981307570690	264870384813674	7585104575909880	AP2A1|ANK2|APLP1|APP|ARRB1|BCR|CANX|SCARB2|LYST|CLN3|CLTC|DNM1|DPYSL2|FOLR1|IGF2R|LIPA|LRP1|NPC1|OPHN1|PPT1|RAB1A|SORT1|SH3GL2|SNAP25|UBE3A|VLDLR|RAB7A|PLA2G6|SYNJ1|AP3D1|RUBCN|DNAJC6|SNAP91|ATP9A|USP20|MLC1|DNAJC13|PIP5K1C|ANKFY1|ATP6V1H|OCIAD1|ARL8B|LMBRD1|TBC1D24|DENND1A|GPR107|CACNG8|SPG11|BLTP1|DNER|C9orf72|LRRTM1|MIA3	-7862639199544370	61.0	0.0	0.0
1	1	1	0	1	-2.21727e+16	-2.56662e+16	-8835464841848800	0.0	-4605782039074540	GO:0034765	GO Biological Processes	regulation of monoatomic ion transmembrane transport	19_GO:0051179 localization	-9814963461218110	2.73676e+16	762899912761752	ANK2|HCN2|CACNA1A|CALM1|CLCN2|PTK2B|FGF12|FGF14|GRIN1|HTT|HPCA|KCNA2|KCNC3|KCND1|KCND2|KCND3|KCNJ10|KCNJ11|KCNQ2|KCNQ3|PDPK1|PLP1|PRNP|RELN|PSEN2|SCN1A|SCN2A|SCN8A|ABCC8|TMBIM6|THY1|PLA2G6|CACNA1I|CACNA1G|CACNA2D2|YWHAQ|HECW1|UBQLN1|CRBN|CAB39|SCN3B|KCNK12|GJC2|JPH3|CACNG8|THADA|JPH4|SHANK3|UBR3|NALCN	-7839317498751760	59.0	0.0	0.0
1	0	0	1	0	-8802678577144510	0.0	0.0	-9787893043412140	0.0	hsa00190	KEGG Pathway	Oxidative phosphorylation		-9787893043412140	1.12851e+16	1.11111e+16	ATP5F1B|ATP6V1A|ATP6AP1|ND6|NDUFS1|NDUFS2|NDUFV1|SDHA|UQCRC1|UQCRC2|ATP6V0D1|ATP6V1D|ATP6V1H	-7.859e+16	40.0	0.0	0.0
1	0	0	1	1	-6494432699050900	0.0	0.0	-6630452483699680	-2.71595e+16	R-HSA-6807878	Reactome Gene Sets	COPI-mediated anterograde transport		-9784504373412680	5496815066121990	8975350759215390	ANK2|CAPZB|COPA|COPB1|DYNC1H1|FOLR1|RAB1A|SPTB|SPTBN1|SPTBN2|TUBB2A|USO1|GBF1|NAPG|COPB2|GOSR2|TUBB4A|COG5|COPG1|DYNC1LI1|ACTR10	-7812523365032740	10.0	0.0	0.0
0	1	1	0	1	0.0	-2.91852e+16	-9735098887737230	0.0	-2.23867e+16	GO:0044057	GO Biological Processes	regulation of system process	19_GO:0032501 multicellular organismal process	-9735098887737230	5379319265906700	8974924107555120	ANK2|ATP1A3|ATP2B2|HCN2|DLG4|PTK2B|FGF12|SLC8A2|SLC8A3|ABCC8|TNR|NRXN1|NRXN2|RIMS2|MGLL|DLGAP4|CTNNA3|SCN3B|CELF4|DLGAP3|SHANK3|STX1B	-7811422558931840	43.0	0.0	0.0
1	0	0	1	1	-5868837058467900	0.0	0.0	-273201777882928	-9708539115351220	GO:0010876	GO Biological Processes	lipid localization	19_GO:0051179 localization	-9708539115351220	6020743336053980	924927108249928	ABCA3|SCARB2|CLN3|CLN8|GBA1|HEXA|LIPA|NPC1|PSAP|SLC2A1|CDS2|ABCG1|VPS13A|ATP11A|VPS13C|ARL8B|TMEM30A|ANO3|SPNS1|BLTP1	-7788889897833520	79.0	1.0	1.0
1	0	0	0	0	-9676750154566340	0.0	0.0	0.0	0.0	R-HSA-5620912	Reactome Gene Sets	Anchoring of the basal body to the plasma membrane		-9676750154566340	9644132653061220	1.05097e+16	NPHP1|OFD1|CKAP5|RPGRIP1L|TCTN3|TMEM216|AHI1|MKS1|CC2D2A|TCTN1|TCTN2|CEP290|TMEM67|TTBK2	-7762761093164080	22.0	0.0	0.0
0	1	1	0	1	0.0	-2.09593e+16	-6858013970143290	0.0	-6198311267177190	GO:0048168	GO Biological Processes	regulation of neuronal synaptic plasticity	19_GO:0050789 regulation of biological process	-9672056174419610	7420929947245730	962064821496747	APP|CLN3|DLG4|GRIK2|GRIN1|KCNJ10|NF1|SLC8A2|PPFIA3|SYNGAP1|NEURL1|NCDN|NPTN|SLC4A10|JPH3|SHANK3	-7703709450694760	80.0	1.0	1.0
1	0	0	1	0	-3.69318e+16	0.0	0.0	-9640313575353670	0.0	R-HSA-9711123	Reactome Gene Sets	Cellular response to chemical stress		-9640313575353670	8768071124855040	1.02378e+16	PSMA7|PSMC4|PSMC5|PSMC6|PSMD2|PRDX2|TKT|CUL3|SQSTM1|PSMF1|PSMD6|LRPPRC|PSME3|HM13|COX20	-7729506172737600	52.0	0.0	0.0
1	0	0	1	1	-9554993876232770	0.0	0.0	-3.37537e+16	-8413992534991120	GO:0006643	GO Biological Processes	membrane lipid metabolic process	19_GO:0008152 metabolic process	-9625331791413500	3868838478594570	8171828522509960	ABCA2|ASAH1|CLN8|GALC|B4GALNT1|GBA1|GLB1|HEXA|HEXB|NEU1|PIGA|PPT1|PSAP|SMPD1|ELOVL4|TH|GPAA1|TM9SF2|SPTLC1|ST8SIA3|PIGT|CLN6|SMPD3|SERINC1|ELOVL5|FA2H|TLCD3B|PIGO|PIGS|SPTSSB	-7.66238e+16	81.0	1.0	1.0
1	1	1	1	1	-4214552276195980	-2.42695e+16	-3.22068e+16	-4117681043364250	-3342429149175080	GO:0030705	GO Biological Processes	cytoskeleton-dependent intracellular transport	19_GO:0051179 localization	-9625331791413500	3868838478594570	8171828522509960	APBA1|APP|KIF1A|CLN3|DYNC1H1|HTT|KIF5A|MAP1A|MAP1B|MAPT|OPA1|PAFAH1B1|RAB1A|RAB6A|SPG7|UCHL1|AP3D1|LRPPRC|KIF1C|COPG1|KIFAP3|KIF1B|MAPK8IP3|IFT172|ARL8B|SYBU|ACTR10|CAMSAP3|SPG11|CCDC88C	-7.66238e+16	55.0	0.0	0.0
1	0	0	1	0	-7359826613922440	0.0	0.0	-5501824373563110	0.0	R-HSA-382556	Reactome Gene Sets	ABC-family proteins mediated transport		-9616591477524480	5390080792993410	8848939975703640	ABCA2|ABCA3|ABCB7|ABCD1|KCNJ11|PSMA7|PSMC4|PSMC5|PSMC6|PSMD1|PSMD2|PSMD3|SEL1L|VCP|PEX3|PSMF1|ABCG1|PSMD6|ABCB6|PSME3|ABCB8	-7657199596452550	52.0	0.0	0.0
0	0	0	0	1	0.0	0.0	0.0	0.0	-9605573250409560	GO:0098656	GO Biological Processes	monoatomic anion transmembrane transport	19_GO:0051179 localization	-9605573250409560	1.0912e+16	1.08907e+16	CLCN4|CLCN6|CLCN7|GABRA3|GLRA1|GLRB|SLC6A1|SLC12A6|SLC12A9|SLC4A10|SLC12A5|ANO3|TTYH3	-7697924367038320	64.0	0.0	0.0
1	0	0	1	1	-4.42582e+16	0.0	0.0	-9116594506179610	-4818454933286950	R-HSA-1280218	Reactome Gene Sets	Adaptive Immune System		-9603815300384750	2.30336e+16	7.25904e+16	AP2A1|AP1B1|CALM1|CALR|CANX|CAPZB|CLTC|CTSB|CTSD|DNM1|DYNC1H1|MTOR|PDIA3|ITPR1|KIF3C|KIF5A|PDPK1|PIK3R1|PIK3R2|CTSA|LGMN|PSMA7|PSMC4|PSMC5|PSMC6|PSMD1|PSMD2|PSMD3|SEC13|SH3GL2|SPTBN2|TUBB2A|UBA1|UBE2A|UBE3A|RAB7A|CUL3|CUL2|CDC23|CTSF|UBE4A|PSMF1|NPEPPS|SEC24C|PSMD6|PJA2|HUWE1|BCAP31|PSME3|STUB1|TUBB4A|KIFAP3|UFL1|ANAPC13|PIK3R4|SAR1B|DYNC1LI1|SEC61A2|RNF130|ACTR10|ANAPC1|FBXO44|UBE2F|FBXL16|FBXO4…	-764619244205168	3.0	0.0	0.0
1	1	1	1	1	-4194232889717960	-2.41666e+16	-3.20818e+16	-4101501019153000	-3.32844e+16	GO:0099111	GO Biological Processes	microtubule-based transport	19_GO:0051179 localization	-9572711639993170	3.85006e+16	8138244063335370	APBA1|APP|KIF1A|CLN3|DYNC1H1|HTT|KIF5A|MAP1A|MAP1B|MAPT|OPA1|PAFAH1B1|RAB1A|RAB6A|SPG7|UCHL1|OFD1|AP3D1|LRPPRC|KIF1C|COPG1|KIFAP3|KIF1B|MAPK8IP3|IFT172|ARL8B|SYBU|ACTR10|CAMSAP3|SPG11	-7.61685e+16	55.0	0.0	0.0
1	0	0	1	0	-6.78129e+16	0.0	0.0	-9551643865996570	0.0	hsa05020	KEGG Pathway	Prion disease		-9551643865996570	7.24356e+16	9649780381104090	ATP5F1B|ND6|NCAM1|NDUFS1|NDUFS2|NDUFV1|PSMA7|PSMC4|PSMC5|PSMC6|PSMD2|SDHA|UQCRC1|UQCRC2|VDAC2|PSMD6|TUBB4A	-7651792220465190	40.0	0.0	0.0
1	0	0	1	0	-9543441414488510	0.0	0.0	-7071196577626330	0.0	GO:0006790	GO Biological Processes	sulfur compound metabolic process	19_GO:0008152 metabolic process	-9543441414488510	5041251159554730	8741113800161730	ABCB7|ACAT1|ABCD1|BTD|DLD|FXN|GLB1|HEXA|HEXB|HSD17B4|HSPA9|MTHFD1|MVK|PDHB|ELOVL4|SUOX|PDHX|NFS1|MCCC1|ELOVL5|MMS19|NUBPL|SLC19A3	-7646669884576340	82.0	1.0	1.0
1	1	0	1	1	-4301298163454680	-2108248406705400	0.0	-5627317307053170	-3.89262e+16	GO:0051650	GO Biological Processes	establishment of vesicle localization	19_GO:0051179 localization	-9541797405525720	419882764294529	8292751581642390	KIF1A|CLN3|DNM1|TOR1A|HTT|KIF5A|PAFAH1B1|SEPTIN5|PSEN1|RAB1A|RAB7A|CUL3|GBF1|SYNJ1|AP3D1|SNAP91|KIF1C|COPS5|KIFAP3|SYT11|EXOC6B|TMEM230|EXOC1|TBC1D23|TRAPPC11|SPG11|TRAPPC9	-7589438787185000	16.0	0.0	0.0
1	0	0	1	1	-2874115128715180	0.0	0.0	-451701442481878	-4468440751657120	WP2059	WikiPathways	Alzheimer's disease and miRNA effects		-951404500072176	3143431263858090	7738800891980970	ADAM10|APP|ATP2A2|CALM1|CAPN1|CSNK2B|MTOR|GRIN1|GSK3B|ITPR1|KIF5A|LRP1|MAPT|PIK3R1|PIK3R2|EIF2AK2|PSEN1|PSEN2|PSMA7|PSMC4|PSMC5|PSMC6|PSMD1|PSMD2|PSMD3|TUBB2A|VDAC2|NAE1|ATG13|PSMD6|APC2|RTN3|TUBB4A|PLCB1|NCSTN|BACE1|PIK3R4|ATG2B|RTN4	-756342704395734	9.0	0.0	0.0
1	1	0	1	0	-888559538637492	-7812964343811520	0.0	-4305154266262250	0.0	WP4686	WikiPathways	Leucine, isoleucine and valine metabolism		-9464319777246780	1211698717948710	1.08025e+16	ACAT1|AUH|BCKDHB|DLD|ECHS1|ALDH6A1|MMUT|PCCA|PCCB|HIBCH|MCCC1	-7518882332986140	73.0	0.0	0.0
0	0	1	0	0	0.0	0.0	-9463783978824690	0.0	0.0	GO:0035418	GO Biological Processes	protein localization to synapse	19_GO:0051179 localization	-9463783978824690	2.16029e+16	1335765351825740	DLG4|MAP1A|BSN|NRXN1|NRXN2|SLITRK3|NSG1|STX1B|LRRTM1	-7579119002374140	63.0	0.0	0.0
1	0	0	1	0	-9430976843564710	0.0	0.0	-4981550151925870	0.0	GO:0006119	GO Biological Processes	oxidative phosphorylation	19_GO:0008152 metabolic process	-9430976843564710	8368875442739070	9959034774557540	COX15|DLD|FXN|ATP6|NDUFA10|NDUFS1|NDUFS2|NDUFS3|NDUFV1|NDUFS4|NDUFS8|SDHA|UQCRC1|UQCRC2|NDUFS7	-7550766208540410	18.0	0.0	0.0
1	0	0	0	1	-4224219064413840	0.0	0.0	0.0	-6075305955822380	GO:0006865	GO Biological Processes	amino acid transport	19_GO:0051179 localization	-9403079413491820	5013925729442970	8588001826350650	APBA1|CLN3|CLN8|GFAP|KCNJ10|NF1|NTRK2|PSEN1|SLC6A1|SLC16A2|XK|SLC6A5|SLC25A15|ARL6IP5|SERINC3|PRAF2|SLC17A5|SLC38A7|SFXN4|MFSD12|SLC6A19|SLC6A17	-7.45936e+16	83.0	1.0	1.0
1	1	0	1	0	-9397699285061510	-2.80436e+16	0.0	-3.68414e+16	0.0	GO:0016054	GO Biological Processes	organic acid catabolic process	19_GO:0008152 metabolic process	-9397699285061510	5769993894993890	8981837905468540	ACAA1|ACAT1|ABCD1|AUH|BCKDHB|DLD|ECHS1|HEXA|HEXB|HSD17B4|OTC|PCCB|PEX7|PHYH|PEX2|ALDH5A1|ILVBL|SLC27A4|HIBCH|MCCC1	-7520433030684	39.0	0.0	0.0
1	1	0	1	0	-9397699285061510	-2.80436e+16	0.0	-3.68414e+16	0.0	GO:0046395	GO Biological Processes	carboxylic acid catabolic process	19_GO:0008152 metabolic process	-9397699285061510	5769993894993890	8981837905468540	ACAA1|ACAT1|ABCD1|AUH|BCKDHB|DLD|ECHS1|HEXA|HEXB|HSD17B4|OTC|PCCB|PEX7|PHYH|PEX2|ALDH5A1|ILVBL|SLC27A4|HIBCH|MCCC1	-7520433030684	39.0	0.0	0.0
1	0	0	1	0	-9381872350706210	0.0	0.0	-5501824373563110	0.0	WP111	WikiPathways	Electron transport chain: OXPHOS system in mitochondria		-9381872350706210	9175970873786400	101918160940662	COX15|ATP6|NDUFA10|NDUFS1|NDUFS2|NDUFS3|NDUFV1|NDUFS4|NDUFS8|SDHA|SURF1|UQCRC1|UQCRC2|NDUFS7	-750607083458697	18.0	0.0	0.0
0	0	1	0	1	0.0	0.0	-4011624275755690	0.0	-571103893986209	GO:0050767	GO Biological Processes	regulation of neurogenesis	19_GO:0032502 developmental process	-9374240038963470	2.91486e+16	7546507950554130	CDH4|DAB1|DLG4|MEGF8|FOXG1|MTOR|GDI1|GFAP|L1CAM|MAG|MAP1B|MAPT|MECP2|NF1|NRDC|NTRK2|PAFAH1B1|RELN|PSEN1|PTPRD|SLIT1|HLTF|CDKL5|ABCC8|THY1|TNR|FXR1|SYNGAP1|SYNJ1|NEURL1|MAP3K13|RAPGEF2|SEMA6B|RUFY3|KIFAP3|SPART|CUX2|UFL1|NPTN|RTN4|GJC2|TBC1D24|SHANK3	-7433922038838860	38.0	0.0	0.0
1	1	0	1	1	-3.30171e+16	-4497449970101420	0.0	-3.178e+16	-2568613971758890	GO:0032386	GO Biological Processes	regulation of intracellular transport	19_GO:0051179 localization	-932070596963893	3.09623e+16	7626496455361800	ABCA2|DYNC1H1|DMTN|GDI1|GSK3B|HPCA|LAMP1|MAP1B|NF1|PIK3R1|PIK3R2|PRNP|PSEN1|RANGAP1|REEP5|NUP214|AAAS|BAP1|BRSK2|NPEPPS|ATG13|HUWE1|ATP9A|BCAP31|RUFY3|MLC1|MTCL1|DNAJC13|ATP13A2|PTPN23|SAR1B|VPS35|TMEM30A|VPS11|DMAP1|RINT1|XPO4|CEP290|NUS1	-7383767710165700	68.0	0.0	0.0
0	1	0	1	1	0.0	-3387555672180290	0.0	-5278503463647330	-8962415118178190	R-HSA-983712	Reactome Gene Sets	Ion channel transport		-9316590545699800	3.97977e+16	8082366740257400	ATP1A3|ATP2A2|ATP2B1|ATP2B2|ATP2B3|ATP6V1A|ATP6V0C|ATP6V0A1|ATP6AP1|ATP7B|CALM1|CLCN2|CLCN4|CLCN6|CLCN7|ATP6V0D1|ATP9A|ATP11A|ATP13A2|TRPC4AP|ATP2C1|ATP6V1D|ATP6V1H|ANO10|UNC79|ANO3|TTYH3|NALCN	-7381332344344600	84.0	1.0	1.0
1	0	0	1	0	-9263316459425430	0.0	0.0	-2860063589503830	0.0	WP4324	WikiPathways	Mitochondrial complex I assembly model OXPHOS system		-9263316459425430	1.32607e+16	1.12607e+16	NDUFA10|NDUFS1|NDUFS2|NDUFS3|NDUFV1|NDUFS4|ACAD9|FOXRED1|NUBPL|NDUFAF2|NDUFAF6	-7397632077597720	18.0	0.0	0.0
1	0	0	1	0	-4685542850268150	0.0	0.0	-7614698222280140	0.0	R-HSA-5619084	Reactome Gene Sets	ABC transporter disorders		-926259599789251	6.10086e+16	8943568796548630	ABCA3|ABCD1|KCNJ11|PSMA7|PSMC4|PSMC5|PSMC6|PSMD1|PSMD2|PSMD3|SEL1L|ABCC8|VCP|PSMF1|PSMD6|ABCB6|PSME3|LMBRD1	-732901138042687	52.0	0.0	0.0
1	1	1	0	1	-5812051672826550	-2232370020508320	-2300371970499910	0.0	-8830413346914730	GO:0043523	GO Biological Processes	regulation of neuron apoptotic process	19_GO:0050789 regulation of biological process	-9257155908648600	3.64244e+16	788818704799507	AARS1|PARP1|ATM|CLN3|CLN8|PTK2B|GBA1|GBE1|GRID2|GRN|GRIK2|GRIK5|MAG|MECP2|NF1|NTRK2|PPT1|PRKCG|PRNP|LGMN|PSEN1|STXBP1|WFS1|SYNGAP1|NAE1|AIFM1|FAIM2|ATP13A2|BACE1|DNAJC5|AGAP2	-7.32524e+16	44.0	0.0	0.0
1	0	0	1	1	-2762111367853180	0.0	0.0	-2474371398227670	-9248178952879810	R-HSA-532668	Reactome Gene Sets	N-glycan trimming in the ER and Calnexin/Calreticulin cycle		-9248178952879810	2628484519282990	1.40182e+16	CALR|CANX|PDIA3|SEL1L|MAN1B1|GANAB|UGGT1|SYVN1	-7385342413924930	67.0	0.0	0.0
1	0	0	1	1	-8456168631023580	0.0	0.0	-328940249918595	-5392215263280150	GO:0006605	GO Biological Processes	protein targeting	19_GO:0051179 localization	-9247498222810150	3.39193e+16	7.75427e+16	SCARB2|TIMM8A|LAMP2|PEX6|PEX7|PEX10|PEX2|SORT1|SRP54|SRPRA|SSR1|YWHAG|RAB7A|USP9X|PEX3|SQSTM1|AP3D1|AIFM1|PMPCB|BCAP31|PITRM1|YWHAQ|PMPCA|VPS13A|SAMM50|VPS41|CHMP4A|PIK3R4|VPS13C|SEC61A2|VPS13D|SIL1|GNPTG|DNAJC19	-7317241548693440	7.0	0.0	0.0
1	0	0	1	0	-9229424431300760	0.0	0.0	-4878012246149830	0.0	GO:0006888	GO Biological Processes	endoplasmic reticulum to Golgi vesicle-mediated transport	19_GO:0051179 localization	-9229424431300760	8101071428571420	9755085324193240	COPA|COPB1|SEC13|VCP|USO1|GBF1|ZW10|COPB2|SEC24C|COPG1|SCAP|SAR1B|RINT1|TRAPPC11|MIA3	-7369417182364740	10.0	0.0	0.0
1	0	0	1	1	-921293692169739	0.0	0.0	-2645670824964150	-537153527370942	GO:0006664	GO Biological Processes	glycolipid metabolic process	19_GO:0008152 metabolic process	-921293692169739	891627358490566	1.00113e+16	ABCA2|GALC|B4GALNT1|GBA1|GLB1|HEXA|HEXB|SMPD1|GPAA1|PIGT|CLN6|FA2H|PIGO|PIGS	-7355740650095200	49.0	0.0	0.0
1	1	1	1	1	-2.67785e+16	-2015089680972640	-3063013975471490	-3741193538880150	-3.71809e+16	GO:0098930	GO Biological Processes	axonal transport	19_GO:0051179 localization	-9189503044506380	6934311590049290	9198838918914030	KIF1A|DYNC1H1|KIF5A|MAP1A|MAPT|OPA1|PAFAH1B1|SPG7|UCHL1|AP3D1|KIF1C|KIF1B|MAPK8IP3|ARL8B|SYBU|ACTR10	-7264541498160170	55.0	0.0	0.0
1	1	0	1	1	-4642976719305610	-2.98297e+16	0.0	-2450968965650490	-6280202880705890	GO:0046486	GO Biological Processes	glycerolipid metabolic process	19_GO:0008152 metabolic process	-9188217826965560	3.01277e+16	7.52042e+16	ABCA3|ATM|CLN3|DGKB|LIPA|MECP2|MTTP|PAFAH1B1|PIGA|PIK3R1|PIK3R2|SEL1L|ABHD16A|PLA2G6|GNPAT|GPAA1|CDS2|SYNJ1|PITPNM1|IP6K1|FIG4|CEPT1|PNPLA6|MGLL|PLCB1|DDHD2|PIP5K1C|ABHD12|PIK3R4|PIGT|VAC14|ABHD6|SERINC1|PIP4K2C|PTDSS2|PITPNM3|PIGO|SERAC1|PIGS|TTC7B	-7264541498160170	41.0	0.0	0.0
1	0	0	1	1	-9157876075845930	0.0	0.0	-2.62789e+16	-5341031812714280	GO:1903509	GO Biological Processes	liposaccharide metabolic process	19_GO:0008152 metabolic process	-9157876075845930	8832943925233640	9952664311859870	ABCA2|GALC|B4GALNT1|GBA1|GLB1|HEXA|HEXB|SMPD1|GPAA1|PIGT|CLN6|FA2H|PIGO|PIGS	-7308333841957100	49.0	0.0	0.0
1	0	0	0	0	-9156389165997080	0.0	0.0	0.0	0.0	CORUM:7292	CORUM	EIF2B1-EIF2B2-EIF2B3-EIF2B4-EIF2B5 complex		-9156389165997080	6750892857142850	1.8237e+16	EIF2B1|EIF2B4|EIF2B3|EIF2B2|EIF2B5	-7308333841957100	77.0	0.0	0.0
1	0	0	1	0	-9152201133888350	0.0	0.0	-4917203409037510	0.0	GO:0019646	GO Biological Processes	aerobic electron transport chain	19_GO:0008152 metabolic process	-9152201133888350	9860854735152480	1.02651e+16	COX15|DLD|NDUFA10|NDUFS1|NDUFS2|NDUFS3|NDUFV1|NDUFS4|NDUFS8|SDHA|UQCRC1|UQCRC2|NDUFS7	-7.30607e+16	18.0	0.0	0.0
1	0	0	1	0	-2.95256e+16	0.0	0.0	-914787497322483	0.0	R-HSA-169911	Reactome Gene Sets	Regulation of Apoptosis		-914787497322483	1.9753e+16	1.2724e+16	OPA1|PSMA7|PSMC4|PSMC5|PSMC6|PSMD2|PSMF1|PSMD6|PSME3	-7303107690845550	52.0	0.0	0.0
1	1	1	0	1	-2038517967907670	-2.35439e+16	-8768798060185550	0.0	-4.60888e+16	GO:0043269	GO Biological Processes	regulation of monoatomic ion transport	19_GO:0051179 localization	-9121354620569940	2.45518e+16	7156635232967450	ANK2|ATP2B1|HCN2|CACNA1A|CALM1|CLCN2|CNTN1|PTK2B|FGF12|FGF14|GRIN1|HTT|HPCA|KCNA2|KCNC3|KCND1|KCND2|KCND3|KCNJ10|KCNJ11|KCNQ2|KCNQ3|PDPK1|PLP1|PRNP|RELN|PSEN2|SCN1A|SCN2A|SCN8A|ABCC8|TMBIM6|THY1|WFS1|PLA2G6|CACNA1I|CACNA1G|CACNA2D2|YWHAQ|HRH3|HECW1|UBQLN1|CRBN|SARAF|CAB39|SCN3B|KCNK12|GJC2|JPH3|CACNG8|THADA|SPG11|JPH4|SHANK3|UBR3|NALCN	-7199307916498060	59.0	0.0	0.0
1	1	0	1	0	-9106384533404050	-2.96582e+16	0.0	-2.98581e+16	0.0	GO:0044282	GO Biological Processes	small molecule catabolic process	19_GO:0008152 metabolic process	-9106384533404050	4589842169162280	8318881619272560	ACAA1|ACAT1|ABCD1|AUH|BCKDHB|CYP27A1|DLD|ECHS1|GLB1|HEXA|HEXB|HSD17B4|PNP|OTC|PCCB|PEX7|PHYH|PEX2|ALDH5A1|ILVBL|SLC27A4|HIBCH|MCCC1|SRD5A3	-7268371578174200	39.0	0.0	0.0
0	0	1	0	1	0.0	0.0	-709670543467803	0.0	-8458386600922590	GO:0098659	GO Biological Processes	inorganic cation import across plasma membrane	19_GO:0051179 localization	-9061358652810830	5047075651621100	8431177369067370	ATP1A3|HCN2|CACNA1A|KCNJ10|KCNJ11|SCN1A|SCN2A|SCN8A|SLC6A1|SLC8A2|SLC8A3|ABCC8|CACNA1I|CACNA1G|SLC12A6|SLC9A6|SLC39A14|SLC39A6|SLC12A9|SLC12A5|NALF1	-7144164451533360	47.0	0.0	0.0
0	0	1	0	1	0.0	0.0	-709670543467803	0.0	-8458386600922590	GO:0099587	GO Biological Processes	inorganic ion import across plasma membrane	19_GO:0051179 localization	-9061358652810830	5047075651621100	8431177369067370	ATP1A3|HCN2|CACNA1A|KCNJ10|KCNJ11|SCN1A|SCN2A|SCN8A|SLC6A1|SLC8A2|SLC8A3|ABCC8|CACNA1I|CACNA1G|SLC12A6|SLC9A6|SLC39A14|SLC39A6|SLC12A9|SLC12A5|NALF1	-7144164451533360	47.0	0.0	0.0
1	0	0	0	0	-9041037581213940	0.0	0.0	0.0	0.0	GO:0006974	GO Biological Processes	DNA damage response	19_GO:0050896 response to stimulus	-9041037581213940	3.22752e+16	7590082851747590	PARP1|ATM|ATR|DDB1|DDX1|ERCC4|MTOR|ATXN3|MLH1|MRE11|PRKDC|PSEN1|RFC1|HLTF|UBA1|VCP|VRK1|XRCC1|XRCC4|CUL4B|RUVBL1|NAE1|AP5Z1|STUB1|PNKP|SETX|ZFYVE26|RRM2B|APTX|ADPRS|DMAP1|RINT1|MMS19|CTC1|RNF168|BRAT1	-7208353459489160	85.0	1.0	1.0
0	1	0	1	1	0.0	-3.40523e+16	0.0	-29951020339283	-4670073915942860	hsa04728	KEGG Pathway	Dopaminergic synapse		-9037100421744530	4606457936003390	8233357785504110	ADCY5|ARRB1|CACNA1A|CALM1|COMT|ATF6B|DDC|GNAL|GNAO1|GRIA2|GRIA3|GSK3B|ITPR1|KIF5A|PPP2R2A|PPP2R2B|PPP2R2C|PRKCG|SCN1A|SLC6A3|TH|PLCB1|PPP1R1B	-7121511747182480	86.0	1.0	1.0
1	0	0	1	1	-5.61475e+16	0.0	0.0	-5598623415738050	-3609197473793520	GO:0006906	GO Biological Processes	vesicle fusion	19_GO:0051179 localization	-9034801541235360	5287412587412580	8514787042097430	CLN3|SNAP25|STXBP1|VAMP1|RAB7A|STX7|USO1|GOSR2|SYT11|ATP13A2|STX12|VPS41|CHMP4A|ANKFY1|CHMP5|ARL8B|VPS11|VPS16|SPG11|STX1B	-7120812479833100	29.0	0.0	0.0
1	1	0	1	1	-4594803477330920	-3.64334e+16	0.0	-3.07561e+16	-5846548622402120	GO:0006650	GO Biological Processes	glycerophospholipid metabolic process	19_GO:0008152 metabolic process	-9023440271639170	3258088742243670	7580681033531550	ABCA3|ATM|CLN3|DGKB|MECP2|PAFAH1B1|PIGA|PIK3R1|PIK3R2|ABHD16A|PLA2G6|GNPAT|GPAA1|CDS2|SYNJ1|PITPNM1|IP6K1|FIG4|CEPT1|PNPLA6|PLCB1|PIP5K1C|ABHD12|PIK3R4|PIGT|VAC14|ABHD6|SERINC1|PIP4K2C|PTDSS2|PITPNM3|PIGO|SERAC1|PIGS|TTC7B	-7111044953243470	41.0	0.0	0.0
1	0	0	1	0	-4.62901e+16	0.0	0.0	-900974029744795	0.0	R-HSA-379716	Reactome Gene Sets	Cytosolic tRNA aminoacylation		-900974029744795	3.39276e+16	1.5027e+16	AARS1|EPRS1|GARS1|NARS1|WARS1|FARSB|LARS1	-7178378229961460	8.0	0.0	0.0
1	0	0	1	0	-3.79503e+16	0.0	0.0	-8997588874154060	0.0	R-HSA-71406	Reactome Gene Sets	Pyruvate metabolism and Citric Acid (TCA) cycle		-8997588874154060	1.90347e+16	1246579193661920	ACO2|DLAT|MDH2|ME2|OGDH|PDHA1|PDHB|SDHA|SUCLA2	-7.16886e+16	35.0	0.0	0.0
0	1	1	0	1	0.0	-4.07048e+16	-3.27979e+16	0.0	-6239653934461020	WP2380	WikiPathways	Brain-derived neurotrophic factor (BDNF) signaling pathway		-8992488836002090	4406177156177150	8123518665722200	CDH2|DOCK3|DPYSL2|PTK2B|MTOR|GRIA2|GRIA3|GRIN1|GSK3B|MAPT|NCAM1|NTRK2|PDPK1|PIK3R1|PIK3R2|RPS6KA3|SORT1|CDKL5|SYN1|SQSTM1|CRTC1|KIDINS220|LINGO1|SIRPA	-7081681433386020	87.0	1.0	1.0
0	0	1	0	1	0.0	0.0	-5946390196115540	0.0	-5222202589172970	GO:0007416	GO Biological Processes	synapse assembly	19_GO:0032502 developmental process	-898588175421728	5001606501606500	8374398748807520	ADD2|APP|CDH2|GPM6A|GRID2|MAP1B|MECP2|NRCAM|PTPRD|SPTBN2|GNPAT|BSN|NRXN1|NRXN2|CLSTN3|SLITRK3|ADGRL3|NPTN|SHANK3|SLC25A46|DNER	-7076656482611080	17.0	0.0	0.0
1	0	0	0	1	-6.47067e+16	0.0	0.0	0.0	-7426179778001380	GO:0008344	GO Biological Processes	adult locomotory behavior	19_GO:0032501 multicellular organismal process	-8977030639503120	5874902874902870	8710641946664670	APP|CSTB|DAB1|CLN8|FGF12|FXN|GLRA1|GLRB|HEXA|KCNJ10|MECP2|NPC1|PAFAH1B1|PPT1|SCN1A|UCHL1|PUM1|ABHD12	-7.06938e+16	12.0	0.0	0.0
0	1	1	0	1	0.0	-3.13677e+16	-4841133415785150	0.0	-5693705598394280	R-HSA-112314	Reactome Gene Sets	Neurotransmitter receptors and postsynaptic signal transmission		-8975005168950390	3.73988e+16	7804484910983820	ADCY5|AP2A1|APBA1|CALM1|CHRNA4|CHRNB2|DLG4|GABRA3|GLRA1|GLRB|GNAL|GRIA2|GRIA3|GRIK2|GRIK5|GRIN1|KCNJ10|MAPT|PDPK1|PRKCG|RPS6KA3|TSPAN7|TUBB2A|TUBB4A|CAMKK2|PLCB1|NPTN|GIT1|CACNG8	-7.06893e+16	20.0	0.0	0.0
0	0	0	0	1	0.0	0.0	0.0	0.0	-8973023373219510	GO:0006820	GO Biological Processes	monoatomic anion transport	19_GO:0051179 localization	-8973023373219510	9707471235988340	1.01463e+16	CLCN4|CLCN6|CLCN7|GABRA3|GLRA1|GLRB|SLC6A1|SLC12A6|SLC12A9|SLC4A10|SLC12A5|ANO3|TTYH3	-7.14691e+16	64.0	0.0	0.0
1	1	0	1	0	-4989361882516980	-3.55285e+16	0.0	-7815146690830760	0.0	R-HSA-162906	Reactome Gene Sets	HIV Infection		-8971643867376990	3547830956921860	7.70727e+16	AP2A1|AP1B1|KPNA1|NCBP1|POLR2A|PSMA7|PSMC4|PSMC5|PSMC6|PSMD1|PSMD2|PSMD3|RANGAP1|SEC13|TAF1|TBP|XRCC4|NUP214|AAAS|CTDP1|PSMF1|NUP155|PSMD6|POM121|PSME3|CHMP4A|NELFCD|CHMP5|ATP6V1H|PACS1|NUP133	-7067130697858610	88.0	1.0	1.0
0	1	1	1	0	0.0	-3.96992e+16	-4105088215339210	-2.72591e+16	0.0	R-HSA-9012999	Reactome Gene Sets	RHO GTPase cycle		-8935540284300770	2.70847e+16	7231674017404460	ACTB|ARHGDIG|ATP6AP1|BCR|CAPZB|CLTC|CPD|DOCK3|PTK2B|GPS1|RAPGEF1|ARHGAP35|LMNB1|NDUFS3|OPHN1|PIK3R1|PIK3R2|SPTBN1|VCP|RAB7A|STAM|AAAS|USP9X|CUL3|TMEM59|CDC42BPB|SRGAP3|BCAP31|CCT7|CIT|NISCH|SLITRK3|MCF2L|DOCK9|SAMM50|CYFIP2|GIT1|COPS4|ANKFY1|PAK6|PAK5|KIDINS220|ARHGAP39|ARHGAP33|WDR81|ARL13B	-7032586522137910	74.0	0.0	0.0
1	0	0	1	1	-8933600112821140	0.0	0.0	-3.18325e+16	-6856618778232670	R-HSA-1660662	Reactome Gene Sets	Glycosphingolipid metabolism		-8933600112821140	1.46759e+16	1.1382e+16	ASAH1|GALC|B4GALNT1|GBA1|GLB1|HEXA|HEXB|CTSA|PSAP|SMPD1	-7111381424774520	49.0	0.0	0.0
0	1	1	1	1	0.0	-2.54447e+16	-8931309971312000	-2165840141995450	-2.79304e+16	GO:0017157	GO Biological Processes	regulation of exocytosis	19_GO:0051179 localization	-8931309971312000	965076092292587	1.01076e+16	BCR|SEPTIN5|STXBP1|CADPS|RIMS2|RIMS3|CPLX2|CPLX1|SMPD3|SYT3|RAB3C|RIMS4|RAB15	-7.11038e+16	25.0	0.0	0.0
1	0	0	1	1	-7851844652662790	0.0	0.0	-3.36003e+16	-7838451596832880	GO:0006665	GO Biological Processes	sphingolipid metabolic process	19_GO:0008152 metabolic process	-8909839493163750	4209723397621480	7994787849294310	ABCA2|ASAH1|CLN8|GALC|B4GALNT1|GBA1|GLB1|HEXA|HEXB|NEU1|PPT1|PSAP|SMPD1|ELOVL4|TH|TM9SF2|SPTLC1|ST8SIA3|CLN6|SMPD3|SERINC1|ELOVL5|FA2H|TLCD3B|SPTSSB	-7009987847632370	81.0	0.0	0.0
0	0	1	0	1	0.0	0.0	-3924369992505740	0.0	-4989780023818	GO:0010976	GO Biological Processes	positive regulation of neuron projection development	19_GO:0032502 developmental process	-8909839493163750	4209723397621480	7994787849294310	DDR1|SCARB2|CNTN1|DPYSL3|PTK2B|RAPGEF1|GRN|ARHGAP35|NTRK2|PAFAH1B1|SERPINI1|RELN|RIT2|VLDLR|RAPGEF2|FIG4|SETX|CUX2|CRTC1|NPTN|TMEM30A|CAMK1D|KIDINS220|DAB2IP|TRIM67	-7009987847632370	15.0	0.0	0.0
0	0	1	0	1	0.0	0.0	-8903595821603280	0.0	-2508240348661800	GO:0140029	GO Biological Processes	exocytic process	19_GO:0051179 localization	-8903595821603280	1.87851e+16	1.23672e+16	DMTN|SEPTIN5|STXBP1|PPFIA3|SNPH|CPLX2|UNC13A|STX1B|RAB3C	-7086516773209080	71.0	0.0	0.0
0	0	1	0	1	0.0	0.0	-8881465766091960	0.0	-6.54364e+16	GO:0098609	GO Biological Processes	cell-cell adhesion	19_GO:0009987 cellular process	-8881465766091960	5373845060412220	8543278727085730	ADD2|ASTN1|CNTN1|CTNNA2|CELSR3|L1CAM|STXBP1|TNR|NRXN1|NRXN2|SLITRK3|PIP5K1C|CYFIP2|CTNNA3|CAMSAP3|CADM3|CDH22|IGSF21|CNTN4|CADM2	-7068201920698270	89.0	1.0	1.0
1	0	0	1	1	-5536074067860940	0.0	0.0	-5533729798685490	-3562540217862310	GO:0090174	GO Biological Processes	organelle membrane fusion	19_GO:0009987 cellular process	-8875336857549550	5183737830796650	8391845271118480	CLN3|SNAP25|STXBP1|VAMP1|RAB7A|STX7|USO1|GOSR2|SYT11|ATP13A2|STX12|VPS41|CHMP4A|ANKFY1|CHMP5|ARL8B|VPS11|VPS16|SPG11|STX1B	-6978565327637380	29.0	0.0	0.0
0	0	0	0	1	0.0	0.0	0.0	0.0	-8869680728173090	GO:0015698	GO Biological Processes	inorganic anion transport	19_GO:0051179 localization	-8869680728173090	9521978155045890	1.00269e+16	CLCN4|CLCN6|CLCN7|GABRA3|GLRA1|GLRB|SLC6A1|SLC12A6|SLC12A9|SLC4A10|SLC12A5|ANO3|TTYH3	-7058941857809910	64.0	0.0	0.0
1	0	1	0	1	-2.85906e+16	0.0	-2.81132e+16	0.0	-5031076183824950	GO:1990806	GO Biological Processes	ligand-gated ion channel signaling pathway	19_GO:0050896 response to stimulus	-8860931182469180	961347743165925	9815939932511310	APP|CLN3|PTK2B|GRIA2|GRIA3|GRID2|GRIK2|GRIK5|GRIN1|ITPR1|PLP1|PLCB1	-6967218077041240	90.0	1.0	1.0
1	0	0	1	0	-6338039055548120	0.0	0.0	-312794297421119	0.0	R-HSA-379726	Reactome Gene Sets	Mitochondrial tRNA aminoacylation		-8856699691069730	1258907758907750	1053340262317410	GARS1|FARS2|HARS2|DARS2|IARS2|VARS2|AARS2|CARS2|NARS2|TARS2	-696450775876232	8.0	0.0	0.0
0	0	0	1	0	0.0	0.0	0.0	-8853364432037710	0.0	R-HSA-4641258	Reactome Gene Sets	Degradation of DVL		-8853364432037710	1.83668e+16	1.22209e+16	PSMA7|PSMC4|PSMC5|PSMC6|PSMD2|CUL3|PSMF1|PSMD6|PSME3	-7046578623360460	52.0	0.0	0.0
0	1	1	0	1	0.0	-2.30381e+16	-8852198262466880	0.0	-2074297425312310	GO:0017156	GO Biological Processes	calcium-ion regulated exocytosis	19_GO:0051179 localization	-8852198262466880	240031746031746	1.33367e+16	STXBP1|CADPS|RIMS2|RIMS3|UNC13A|SYT3|STX1B|RIMS4	-7046578623360460	25.0	0.0	0.0
1	0	0	1	0	-885041590182016	0.0	0.0	-4761143871886930	0.0	GO:0042773	GO Biological Processes	ATP synthesis coupled electron transport	19_GO:0008152 metabolic process	-885041590182016	9336341185410330	9925861440338590	COX15|DLD|NDUFA10|NDUFS1|NDUFS2|NDUFS3|NDUFV1|NDUFS4|NDUFS8|SDHA|UQCRC1|UQCRC2|NDUFS7	-7046578623360460	18.0	0.0	0.0
1	0	0	1	0	-885041590182016	0.0	0.0	-4761143871886930	0.0	GO:0042775	GO Biological Processes	mitochondrial ATP synthesis coupled electron transport	19_GO:0008152 metabolic process	-885041590182016	9336341185410330	9925861440338590	COX15|DLD|NDUFA10|NDUFS1|NDUFS2|NDUFS3|NDUFV1|NDUFS4|NDUFS8|SDHA|UQCRC1|UQCRC2|NDUFS7	-7046578623360460	18.0	0.0	0.0
0	0	0	0	1	0.0	0.0	0.0	0.0	-8849829472331090	GO:0098661	GO Biological Processes	inorganic anion transmembrane transport	19_GO:0051179 localization	-8849829472331090	1.07809e+16	1.03861e+16	CLCN4|CLCN6|CLCN7|GABRA3|GLRA1|GLRB|SLC6A1|SLC12A6|SLC12A9|SLC12A5|ANO3|TTYH3	-7046578623360460	64.0	0.0	0.0
1	1	0	1	0	-3842497916532420	-3440655331021480	0.0	-8828405143499850	0.0	R-HSA-162909	Reactome Gene Sets	Host Interactions of HIV factors		-8828405143499850	1.07375e+16	1.03607e+16	AP2A1|AP1B1|PSMA7|PSMC4|PSMC5|PSMC6|PSMD2|RANGAP1|PSMF1|PSMD6|PSME3|ATP6V1H	-7028850440089180	52.0	0.0	0.0
1	1	1	0	1	-4305510937170670	-2.20354e+16	-2.27939e+16	0.0	-8826849474102110	GO:1901214	GO Biological Processes	regulation of neuron death	19_GO:0050789 regulation of biological process	-8826849474102110	6494801864507400	8973355658962880	ATM|CLN3|CLN8|GBA1|GRN|PPT1|PRKCG|PRNP|PSEN1|STXBP1|SYNGAP1|SLC23A2|FAIM2|BACE1|TBC1D24|DNAJC5|AGAP2	-7028519861720750	44.0	0.0	0.0
0	1	1	0	0	0.0	-8824884078158700	-2509359569934400	0.0	0.0	GO:0043547	GO Biological Processes	positive regulation of GTPase activity	19_GO:0065007 biological regulation	-8824884078158700	7657872081835210	9394041687990610	RAPGEF1|ARHGAP35|MMUT|NF1|CDKL5|TBC1D5|APC2|DOCK9|LARS1|TBC1D13|RALGAPB|TBC1D17|AGAP2|AGAP3|C9orf72	-7027776110695120	91.0	1.0	1.0
1	0	0	1	0	-8817423838481290	0.0	0.0	-3.48981e+16	0.0	CORUM:2920	CORUM	Respiratory chain complex I (lambda subunit) mitochondrial		-8817423838481290	2953515625	1.39994e+16	NDUFS1|NDUFS2|NDUFS3|NDUFV1|NDUFS4|NDUFS8|NDUFS7	-7021534089157030	18.0	0.0	0.0
1	0	0	1	0	-2.1932e+16	0.0	0.0	-8799388720161780	0.0	R-HSA-9759194	Reactome Gene Sets	Nuclear events mediated by NFE2L2		-8799388720161780	1472444011684510	1.13739e+16	PSMA7|PSMC4|PSMC5|PSMC6|PSMD2|TKT|SQSTM1|PSMF1|PSMD6|PSME3	-7005925203303640	52.0	0.0	0.0
1	1	1	1	0	-4487624426983830	-2.51668e+16	-2.56777e+16	-621778430669679	0.0	GO:0072384	GO Biological Processes	organelle transport along microtubule	19_GO:0051179 localization	-8794274244780970	5733338950206410	8561753803169160	KIF1A|CLN3|HTT|KIF5A|MAP1B|MAPT|OPA1|PAFAH1B1|RAB1A|RAB6A|UCHL1|AP3D1|LRPPRC|KIF1C|COPG1|KIFAP3|SYBU|ACTR10	-6903598176078510	55.0	0.0	0.0
0	1	1	1	1	0.0	-5915444358236880	-2343370181980290	-2087866640966740	-3094128647173090	GO:1900271	GO Biological Processes	regulation of long-term synaptic potentiation	19_GO:0048518 positive regulation of biological process	-878417020499038	7710810023310020	9225710178632770	APP|GSK3B|NF1|PRNP|LGMN|RELN|FXR1|SQSTM1|FAM107A|CRTC1|NCSTN|NPTN|NSG1|SHANK3	-6896510082310470	92.0	1.0	1.0
1	0	0	1	0	-8774357675027380	0.0	0.0	-7579968156156970	0.0	hsa05415	KEGG Pathway	Diabetic cardiomyopathy		-8774357675027380	5986013370865580	8740106488087170	PARP1|CTSD|MTOR|ATP6|NDUFA10|NDUFS1|NDUFS2|NDUFS3|NDUFV1|NDUFS4|NDUFS8|PDHB|PRKCG|SDHA|SLC2A1|UQCRC1|UQCRC2|NDUFS7	-6984508280124090	18.0	0.0	0.0
1	1	1	0	0	-2.7334e+16	-2730714906701570	-8753713298692100	0.0	0.0	GO:1902903	GO Biological Processes	regulation of supramolecular fiber organization	19_GO:0050789 regulation of biological process	-8753713298692100	6409224632261280	8896573002960480	ADD2|CTNNA2|DMTN|PTK2B|MAP1A|MAP1B|MAPT|PIK3R1|SPTB|SPTBN1|APC2|CIT|CYFIP2|TMOD2|CAMSAP3|SHANK3|CARMIL2	-6.96626e+16	36.0	0.0	0.0
0	0	0	1	1	0.0	0.0	0.0	-5836620062583250	-5.80353e+16	GO:0070050	GO Biological Processes	neuron cellular homeostasis	19_GO:0042592 homeostatic process	-8746765562111610	6507584722969330	881341854136381	APP|ATP2A2|ATP2B3|ATP6V1A|ATP6V0A1|ATP6AP1|HEXB|MAP1A|PSEN1|SLC8A2|BAP1|ATP6V0D1|ATP6AP2|IMMT|ATP6V1D|ATP6V1H	-6860605594574110	93.0	1.0	1.0
0	1	1	0	0	0.0	-3.56142e+16	-8743136787006560	0.0	0.0	GO:0048791	GO Biological Processes	calcium ion-regulated exocytosis of neurotransmitter	19_GO:0051179 localization	-8743136787006560	480063492063492	1.66808e+16	STXBP1|RIMS2|RIMS3|UNC13A|STX1B|RIMS4	-6958059906964510	25.0	0.0	0.0
1	0	0	1	1	-5716722953851650	0.0	0.0	-4712387919765550	-3.09539e+16	GO:1901617	GO Biological Processes	organic hydroxy compound biosynthetic process	19_GO:0008152 metabolic process	-8739354204334950	3.9963e+16	7813531089017960	ABCA2|ACLY|ASAH1|CYP27A1|DDC|CYB5R3|GBA1|GCH1|LIPA|MVK|PTS|QDPR|SLC6A3|SPR|TH|TM7SF2|PDXK|CYP7B1|IP6K1|SPTLC1|CYB5R1|SRD5A3|DHDDS|NUS1|MFSD12|SPTSSB	-6854689227884400	94.0	1.0	1.0
1	0	0	0	1	-4244369534774430	0.0	0.0	0.0	-8717990222204400	GO:0042987	GO Biological Processes	amyloid precursor protein catabolic process	19_GO:0008152 metabolic process	-8717990222204400	4599847908745240	1.63267e+16	ADAM10|CLN3|PSEN1|ABCG1|NCSTN|BACE1	-6934098321020030	95.0	1.0	1.0
1	0	0	1	1	-5862551272291940	0.0	0.0	-3782886042142440	-37559332252786	GO:0046165	GO Biological Processes	alcohol biosynthetic process	19_GO:0008152 metabolic process	-8697769046193640	5343661657491440	8362867390545210	ABCA2|ACLY|ASAH1|CYP27A1|CYB5R3|GBA1|GCH1|LIPA|MVK|PTS|QDPR|SPR|TM7SF2|IP6K1|SPTLC1|SRD5A3|DHDDS|NUS1|SPTSSB	-6.81608e+16	94.0	0.0	0.0
1	1	0	1	0	-8688179498534640	-2815893794134500	0.0	-4172175023235440	0.0	GO:0072329	GO Biological Processes	monocarboxylic acid catabolic process	19_GO:0008152 metabolic process	-8688179498534640	8147629310344820	9457542972513550	ACAA1|ACAT1|ABCD1|AUH|ECHS1|HEXA|HEXB|HSD17B4|PCCB|PEX7|PHYH|PEX2|ILVBL|SLC27A4	-6908995442713230	39.0	0.0	0.0
1	0	0	0	1	-7549518827712090	0.0	0.0	0.0	-6348898943765760	GO:0090659	GO Biological Processes	walking behavior	19_GO:0032501 multicellular organismal process	-8687088382250660	9330728095433970	9636648277826870	DAB1|CLN8|FXN|GLRA1|GLRB|HEXA|KCNJ10|NPC1|SCN1A|UCHL1|ABHD12|SPG11	-6806877747226360	12.0	0.0	0.0
0	0	1	1	1	0.0	0.0	-4866959173807640	-2332968377850420	-2.29624e+16	GO:0044089	GO Biological Processes	positive regulation of cellular component biogenesis	19_GO:0048518 positive regulation of biological process	-8652596136964950	2.56011e+16	7017037317149700	ABCA3|ATM|ATR|DYNC1H1|DPYSL3|PTK2B|MTOR|GPM6A|GRID2|ARHGAP35|GSK3B|HTT|MAP1B|MAPT|MECP2|NPHP1|NTRK2|PALM|PIK3R1|PSMC5|PSMC6|PTPRD|THY1|VCP|WARS1|RAB7A|STAM|NEURL1|NRXN1|CLSTN3|CKAP5|ACTR3|STUB1|TPPP|WDR45|SLITRK3|CLSTN1|CNOT1|CUX2|ATP13A2|FAM98A|GIT1|CRBN|SMPD3|KCTD17|PIP4K2C|CARMIL2|DAB2IP|LRRTM1	-6773860187506660	96.0	1.0	1.0
1	0	0	1	0	-864827251918825	0.0	0.0	-4.44677e+16	0.0	hsa04714	KEGG Pathway	Thermogenesis		-864827251918825	5.52875e+16	8490772055469460	COX10|COX15|MTOR|ATP6|NDUFA10|NDUFS1|NDUFS2|NDUFS3|NDUFV1|NDUFS4|NDUFS8|SDHA|UQCRC1|UQCRC2|COA7|NDUFAF2|COX20|NDUFAF6|NDUFS7	-6874815166372410	18.0	0.0	0.0
0	0	1	0	1	0.0	0.0	-863913117484046	0.0	-4079689742984600	R-HSA-397014	Reactome Gene Sets	Muscle contraction		-863913117484046	9132915214866430	9770030821737140	ATP1A3|ATP2B2|FGF12|KCND1|KCND2|KCNJ11|SCN2A|SLC8A2|SLC8A3|CACNA1I|TMOD2|SCN3B|KCNK12	-6868749719791740	97.0	1.0	1.0
1	0	0	1	0	-2961889641153070	0.0	0.0	-863910607629852	0.0	R-HSA-9755511	Reactome Gene Sets	KEAP1-NFE2L2 pathway		-863910607629852	1195844716031630	1.05741e+16	PSMA7|PSMC4|PSMC5|PSMC6|PSMD2|TKT|CUL3|SQSTM1|PSMF1|PSMD6|PSME3	-6868749719791740	52.0	0.0	0.0
1	0	0	1	0	-8638668475260120	0.0	0.0	-4.14854e+16	0.0	GO:0022904	GO Biological Processes	respiratory electron transport chain	19_GO:0008152 metabolic process	-8638668475260120	8077991452991450	9405837685425130	COX15|DLD|GBA1|NDUFA10|NDUFS1|NDUFS2|NDUFS3|NDUFV1|NDUFS4|NDUFS8|SDHA|UQCRC1|UQCRC2|NDUFS7	-6868749719791740	18.0	0.0	0.0
0	0	1	0	1	0.0	0.0	-8636084147542580	0.0	-5.60555e+16	R-HSA-5576891	Reactome Gene Sets	Cardiac conduction		-8636084147542580	1.20016e+16	1.05922e+16	ATP1A3|ATP2B2|FGF12|KCND1|KCND2|KCNJ11|SCN2A|SLC8A2|SLC8A3|SCN3B|KCNK12	-6868451157781750	97.0	0.0	0.0
1	0	0	1	0	-4074986688935270	0.0	0.0	-7357362985747850	0.0	GO:0045732	GO Biological Processes	positive regulation of protein catabolic process	19_GO:0048518 positive regulation of biological process	-863086713599554	3.61639e+16	7579793071109070	ABCA2|DDB1|GBA1|GSK3B|LRP1|ATXN3|NRDC|PSEN1|PSMC4|PSMC5|PSMC6|TAF1|VCP|WFS1|RAB7A|USP5|CUL4B|ADAM9|BCAP31|STUB1|APC2|ZER1|UBQLN2|UBQLN1|VPS35|VPS11|NDFIP1|UBR3|DAB2IP	-6755065619876290	46.0	0.0	0.0
1	0	0	0	1	-855559514626547	0.0	0.0	0.0	-8571641892150130	GO:0070085	GO Biological Processes	glycosylation	19_GO:0008152 metabolic process	-8571641892150130	7340182833104110	9138548120817590	CLN5|EXT2|GBA1|STT3A|MAN2A2|NPC1|PSEN1|RPN2|PLOD3|TMEM59|MAN1B1|UGGT1|DHDDS|NUS1|STT3B	-6809671231385420	65.0	0.0	0.0
1	0	0	0	0	-8559504964567640	0.0	0.0	0.0	0.0	GO:0006281	GO Biological Processes	DNA repair	19_GO:0050896 response to stimulus	-8559504964567640	3.75795e+16	7648308838052010	PARP1|ATM|ATR|DDB1|DDX1|ERCC4|ATXN3|MLH1|MRE11|PRKDC|RFC1|HLTF|VCP|XRCC1|XRCC4|CUL4B|RUVBL1|AP5Z1|STUB1|PNKP|SETX|ZFYVE26|RRM2B|APTX|ADPRS|DMAP1|MMS19|RNF168	-6800896600456890	85.0	0.0	0.0
1	0	0	1	1	-6313688924471570	0.0	0.0	-5.75753e+16	-3038803269505030	GO:0048284	GO Biological Processes	organelle fusion	19_GO:0009987 cellular process	-8557915700903770	4.54387e+16	7966418158947340	CLN3|OPA1|SNAP25|STXBP1|VAMP1|RAB7A|STX7|USO1|GOSR2|AFG3L2|SYT11|ATP13A2|STX12|VPS41|CHMP4A|ANKFY1|CHMP5|ARL8B|VPS11|VPS16|SPG11|STX1B	-6683573999543570	29.0	0.0	0.0
0	0	0	1	1	0.0	0.0	0.0	-8546854828107820	-3.47522e+16	GO:0097401	GO Biological Processes	synaptic vesicle lumen acidification	19_GO:0042592 homeostatic process	-8546854828107820	4.36212e+16	1.58794e+16	ATP6V1A|ATP6AP1|ATP6V0D1|ATP6AP2|ATP6V1D|ATP6V1H	-6.79047e+16	93.0	0.0	0.0
1	0	0	1	0	-4439148766114110	0.0	0.0	-85164725860315	0.0	WP183	WikiPathways	Proteasome degradation		-85164725860315	1688560794044660	1.16595e+16	PSMA7|PSMC4|PSMC5|PSMC6|PSMD2|RPN2|UBA1|PSMD6|PSME3	-6761200687615490	52.0	0.0	0.0
1	0	0	0	0	-8504311437638380	0.0	0.0	0.0	0.0	hsa04146	KEGG Pathway	Peroxisome		-8504311437638380	9879355400696860	9872582157028610	ACAA1|ABCD1|HSD17B4|MPV17|MVK|PEX6|PEX7|PEX10|PHYH|PEX2|GNPAT|PEX3	-6750146022577350	37.0	0.0	0.0
1	1	1	1	0	-2469059970635170	-2207744115948900	-2305503840814110	-4079495248388900	0.0	GO:0070201	GO Biological Processes	regulation of establishment of protein localization	19_GO:0051179 localization	-8500239344644920	2.47847e+16	6899443463784860	ADCY5|CLN3|CTSD|DKC1|DMTN|GDI1|GSK3B|HPCA|ITPR1|KCNJ11|MAPT|NF1|PIK3R1|PIK3R2|PRNP|PSEN1|RANGAP1|RAP1GDS1|SNAP25|ABCC8|BAP1|PLA2G6|KLF7|ADAM9|BRSK2|NPEPPS|ABCG1|ATG13|KIAA0586|HUWE1|BCAP31|CCT7|CPLX1|RUFY3|CCT5|PLCB1|MTCL1|ATP13A2|PTPN23|ATP2C1|SAR1B|VPS35|TMEM30A|EXOC1|VPS11|DMAP1|XPO4|CEP290|SRCIN1|NDFIP1|NDUFAF2	-6627352567532890	68.0	0.0	0.0
1	1	0	1	0	-4017024663533440	-4565108436551920	0.0	-8211945572046610	0.0	WP4352	WikiPathways	Ciliary landscape		-8488284107100270	3565929419417790	7486390100986060	CALM1|CREBBP|DYNC1H1|ECHS1|GDI1|GLB1|PAFAH1B1|CTSA|PSMC4|PSMC6|RAB2A|EFTUD2|POM121|LRPPRC|COPS8|AFG3L2|COPS5|CNOT1|EXOC6B|IFT172|COPS7A|COPS4|DYNC1LI1|MKS1|ARL8B|NUP133|EXOC1|CEP290|DCAF11	-6616847396383470	98.0	1.0	1.0
0	1	1	0	1	0.0	-3.16426e+16	-7574685614920690	0.0	-3681252431595440	GO:0001508	GO Biological Processes	action potential	19_GO:0065007 biological regulation	-8457039700407950	5.17839e+16	8172447409700910	ANK2|HCN2|CHRNA4|CLN3|FGF12|MTOR|GLRA1|GRIK2|KCNA2|KCND2|KCND3|NRCAM|NTRK2|SCN1A|CACNA1I|CACNA1G|NUP155|GPR88|SCN3B	-6587048230565330	99.0	1.0	1.0
0	1	1	1	1	0.0	-3393645561496370	-4096485513767990	-5320601354755100	-3099086776741830	GO:0071417	GO Biological Processes	cellular response to organonitrogen compound	19_GO:0050896 response to stimulus	-8440267880116010	2395304360069460	6821397106889260	ACTB|ADCY5|PARP1|APLP1|APP|ATP1A3|HCN2|CACNA1A|CHRNB2|DDC|DNMT1|DMTN|EPRS1|FOLR1|MTOR|GLRA1|GNAO1|RAPGEF1|GSK3B|HPCA|ITPR1|LRP1|MAP1B|NTRK2|PDPK1|PIK3R1|PIK3R2|PRKDC|PRNP|LGMN|PSEN1|RANGAP1|RAP1GDS1|TAF1|TH|HSP90B1|YWHAG|NEURL1|RAPGEF2|RRAGB|SLC27A4|HRH3|WDTC1|PLCB1|NCSTN|SLC39A14|BACE1|NSG1|CHMP5|LARS1|SMPD3|SLC30A10|ARID1B|PPP1R1B	-6571716857636700	100.0	1.0	1.0
0	1	1	0	1	0.0	-2.46361e+16	-4391565582109010	0.0	-468094632688892	GO:0001558	GO Biological Processes	regulation of cell growth	19_GO:0040007 growth	-8417696386474460	2713111470868030	700134310247234	ADAM10|DDR1|CDH4|MEGF8|EIF4G2|PTK2B|FXN|MTOR|GDI1|GSK3B|L1CAM|MAG|MAP1B|MAPT|NCBP1|NDUFS3|NRCAM|PAFAH1B1|PHB1|PPT1|RPS6KA3|SLIT1|CDKL5|TNR|BAP1|CTDP1|MAP3K13|RIMS2|CLSTN3|SLC23A2|SEMA6B|FAM107A|CLSTN1|RUFY3|RIMS1|UNC13A|SPART|ATAD3A|RTN4|PAK5|BLTP1|SYT3|BRAT1	-6553438260384790	38.0	0.0	0.0
1	0	1	0	1	-298807722933355	0.0	-2496590715579120	0.0	-8413992534991120	GO:1901215	GO Biological Processes	negative regulation of neuron death	19_GO:0048519 negative regulation of biological process	-8413992534991120	7853398868589440	9221624954620760	CLN3|CLN8|GBA1|GRN|PPT1|PRKCG|PSEN1|STXBP1|SYNGAP1|SLC23A2|FAIM2|TBC1D24|DNAJC5|AGAP2	-6.66858e+16	44.0	0.0	0.0
0	0	1	0	0	0.0	0.0	-8361519505381270	0.0	0.0	R-HSA-6794361	Reactome Gene Sets	Neurexins and neuroligins		-8361519505381270	2.09482e+16	1.23816e+16	APBA1|DLG4|STXBP1|NRXN1|NRXN2|DLGAP4|DLGAP3|LRRTM1	-6619338114967740	63.0	0.0	0.0
1	0	0	1	0	-8353276508621540	0.0	0.0	-4006682157775120	0.0	CORUM:2948	CORUM	Respiratory chain complex I (incomplete intermediate), mitochondrial		-8353276508621540	3682305194805190	1.4571e+16	NDUFA10|NDUFS1|NDUFS2|NDUFV1|NDUFS4|NDUFS7	-6612173566399750	18.0	0.0	0.0
1	0	0	0	0	-8313436682807660	0.0	0.0	0.0	0.0	GO:0060271	GO Biological Processes	cilium assembly	19_GO:0009987 cellular process	-8313436682807660	4541885102664910	7.89627e+16	KCNJ10|OFD1|GBF1|ATP6V0D1|KIAA0586|PIBF1|RPGRIP1L|ATXN10|TCTN3|IFT172|TMEM216|AHI1|MKS1|CC2D2A|CPLANE1|TMEM231|TCTN1|TCTN2|CEP290|TMEM67|TTBK2|ARL13B	-6573404750948400	22.0	0.0	0.0
0	0	0	1	1	0.0	0.0	0.0	-4660134714976680	-6256379173420950	GO:0050821	GO Biological Processes	protein stabilization	19_GO:0065007 biological regulation	-8302538892394010	3.5008e+16	7364413497307970	ANK2|CALR|GRN|HCFC1|LAMP1|LAMP2|PEX6|PHB1|PIK3R1|SEL1L|STXBP1|TAF1|VBP1|WFS1|USP9X|PRKRA|RUVBL1|NAPG|RASSF2|STUB1|CCT7|PTGES3|CCT5|MAPK8IP3|STX12|RTN4|MFSD1|SYVN1|WDR81	-644382817076451	62.0	0.0	0.0
0	1	0	0	1	0.0	-5121357036160530	0.0	0.0	-5594708286898820	GO:0099175	GO Biological Processes	regulation of postsynapse organization	19_GO:0050789 regulation of biological process	-8301980697443920	5073779755597930	804982522671247	ADAM10|KIF1A|CDH2|PTK2B|GRID2|NF1|NRCAM|PAFAH1B1|PRNP|RELN|PSEN1|PTPRD|CDKL5|UBE3A|CUX2|VPS35|SRCIN1|SHANK3|ARHGAP33	-644382817076451	48.0	0.0	0.0
0	0	1	0	1	0.0	0.0	-5215779361725510	0.0	-3.63253e+16	GO:0051962	GO Biological Processes	positive regulation of nervous system development	19_GO:0032502 developmental process	-830089368716935	3.12104e+16	7.17105e+16	CDH4|DLG4|MEGF8|FOXG1|MTOR|GDI1|GFAP|GRID2|L1CAM|MAG|MAP1B|MAPT|MECP2|NRDC|NTRK2|PAFAH1B1|RELN|PTPRD|CDKL5|SYNJ1|NEURL1|MAP3K13|NRXN1|CLSTN3|SLITRK3|CLSTN1|RUFY3|CUX2|UFL1|NPTN|GJC2|TBC1D24|SHANK3|LRRTM1	-644382817076451	38.0	0.0	0.0
1	0	0	0	1	-8294025705616220	0.0	0.0	0.0	-641976559396664	hsa00600	KEGG Pathway	Sphingolipid metabolism		-8294025705616220	1.27375e+16	1.04869e+16	ASAH1|GALC|B4GALNT1|GBA1|GLB1|HEXA|HEXB|PSAP|SMPD1|SPTLC1	-6555062149404980	49.0	0.0	0.0
1	1	1	0	0	-2.2999e+16	-3.97425e+16	-7555267776064710	0.0	0.0	GO:0051493	GO Biological Processes	regulation of cytoskeleton organization	19_GO:0050789 regulation of biological process	-8291061588790580	2495984747429830	6.81599e+16	ADD1|ADD2|CAPZB|CLN3|CLTC|CTNNA2|DYNC1H1|DMTN|PTK2B|FLII|MTOR|GPM6B|ARHGAP35|GSK3B|LRP1|MAP1A|MAP1B|MAPT|MECP2|PAFAH1B1|PIK3R1|PIK3R2|RNH1|ATXN7|SPTB|SPTBN1|SPTBN2|TBCD|CKAP5|WASHC5|APC2|TUBB4A|ARFGEF1|DSTN|TPPP|CIT|FAM107A|CYFIP2|GIT1|CHMP4A|TMOD2|CHMP5|CAMSAP3|SHANK3|TMEM67|TTBK2|CARMIL2|C9orf72|WASHC2A	-6.43666e+16	36.0	0.0	0.0
1	0	0	1	0	-2.32387e+16	0.0	0.0	-8278191598741130	0.0	hsa03050	KEGG Pathway	Proteasome		-8278191598741130	2023010033444810	1.21542e+16	PSMA7|PSMC4|PSMC5|PSMC6|PSMD2|PSMF1|PSMD6|PSME3	-6540293796394550	52.0	0.0	0.0
1	0	1	0	1	-2.39375e+16	0.0	-2.45048e+16	0.0	-6995304757687090	GO:0007215	GO Biological Processes	glutamate receptor signaling pathway	19_GO:0050896 response to stimulus	-8276919520548520	781095041322314	8964158721815000	APP|CLN3|PTK2B|GRIA2|GRIA3|GRID2|GRIK2|GRIK5|GRIN1|GRM3|PLP1|PLCB1|NCSTN	-6425291203185270	90.0	0.0	0.0
1	0	0	1	0	-2.52724e+16	0.0	0.0	-8268307462875890	0.0	R-HSA-1234176	Reactome Gene Sets	Oxygen-dependent proline hydroxylation of Hypoxia-inducible Factor Alpha		-8268307462875890	1.58622e+16	1.12555e+16	PSMA7|PSMC4|PSMC5|PSMC6|PSMD2|CUL2|PSMF1|PSMD6|PSME3	-6.53423e+16	52.0	0.0	0.0
0	0	0	0	1	0.0	0.0	0.0	0.0	-8252599860990170	GO:0002265	GO Biological Processes	astrocyte activation involved in immune response	19_GO:0002376 immune system process	-8252599860990170	1.14996e+16	2.13549e+16	APP|GRN|LRP1|PSEN1	-6519991947210110	101.0	1.0	1.0
1	1	0	1	0	-5110539175639100	-2.39038e+16	0.0	-8236462678549000	0.0	GO:0006637	GO Biological Processes	acyl-CoA metabolic process	19_GO:0008152 metabolic process	-8236462678549000	1.29248e+16	1.055e+16	ACAT1|ACLY|DLAT|GCDH|MMUT|OGDH|PDHA1|PDHB|SUCLA2|FITM2	-6505952809824630	35.0	0.0	0.0
1	1	0	1	0	-5110539175639100	-2.39038e+16	0.0	-8236462678549000	0.0	GO:0035383	GO Biological Processes	thioester metabolic process	19_GO:0008152 metabolic process	-8236462678549000	1.29248e+16	1.055e+16	ACAT1|ACLY|DLAT|GCDH|MMUT|OGDH|PDHA1|PDHB|SUCLA2|FITM2	-6505952809824630	35.0	0.0	0.0
1	0	0	0	0	-8215202918616140	0.0	0.0	0.0	0.0	GO:0044782	GO Biological Processes	cilium organization	19_GO:0009987 cellular process	-8215202918616140	4301122872971900	7737054431885480	KCNJ10|OFD1|GBF1|ATP6V0D1|KIAA0586|PIBF1|KIFAP3|RPGRIP1L|ATXN10|TCTN3|IFT172|TMEM216|AHI1|MKS1|CC2D2A|CPLANE1|TMEM231|TCTN1|TCTN2|CEP290|TMEM67|TTBK2|ARL13B	-6485738283806430	22.0	0.0	0.0
0	1	1	0	1	0.0	-2.7195e+16	-5636072860046340	0.0	-4919251597420460	WP4549	WikiPathways	Fragile X syndrome		-8211537179679620	455064198096985	7791549773631630	AP2A1|APP|CLTC|DLG4|DNM1|MTOR|GRIA2|GRIN1|ITPR1|KCND2|MAP1B|MECP2|NF1|NTRK2|SLC6A1|ALDH5A1|SYNGAP1|PLCB1|CYFIP2|DLGAP3|AGAP2	-6.36813e+16	102.0	1.0	1.0
1	1	0	1	0	-2290266461387280	-2329557789124810	0.0	-8200379630384500	0.0	hsa00620	KEGG Pathway	Pyruvate metabolism		-8200379630384500	1.97997e+16	1.20108e+16	ACAT1|ACYP2|DLAT|MDH2|ME2|PDHA1|PDHB|LDHD	-6475070955345950	35.0	0.0	0.0
1	0	0	0	1	-5316281065747050	0.0	0.0	0.0	-5849944489058260	GO:0015711	GO Biological Processes	organic anion transport	19_GO:0051179 localization	-8187278508254020	2.78285e+16	6934437821713470	ABCD1|APBA1|CLN3|CLN8|FOLR1|GFAP|GOT2|KCNJ10|MTTP|NF1|NTRK2|PSAP|PSEN1|SLC2A1|SLC6A1|SLC6A8|SLC16A2|XK|SLC25A11|SLC6A5|SLC33A1|SLC23A2|SLC25A15|SLC35B1|ARL6IP5|SERINC3|SLC27A4|PRAF2|SLC39A14|SLC39A6|SLC17A5|CYB5R1|SLC38A7|SLC4A10|SLC25A23|SLC52A2|SFXN4|MFSD12|SLC6A19|SLC6A17	-634792306514867	83.0	0.0	0.0
1	1	0	1	0	-4966933450455940	-2783125207653030	0.0	-8185527995206190	0.0	GO:0033865	GO Biological Processes	nucleoside bisphosphate metabolic process	19_GO:0008152 metabolic process	-8185527995206190	1.08437e+16	9976585567430000	ACAT1|ACLY|DLAT|GCDH|MMUT|OGDH|PDHA1|PDHB|SUCLA2|PANK2|FITM2	-6463310397144770	35.0	0.0	0.0
1	1	0	1	0	-4966933450455940	-2783125207653030	0.0	-8185527995206190	0.0	GO:0033875	GO Biological Processes	ribonucleoside bisphosphate metabolic process	19_GO:0008152 metabolic process	-8185527995206190	1.08437e+16	9976585567430000	ACAT1|ACLY|DLAT|GCDH|MMUT|OGDH|PDHA1|PDHB|SUCLA2|PANK2|FITM2	-6463310397144770	35.0	0.0	0.0
1	1	0	1	0	-4966933450455940	-2783125207653030	0.0	-8185527995206190	0.0	GO:0034032	GO Biological Processes	purine nucleoside bisphosphate metabolic process	19_GO:0008152 metabolic process	-8185527995206190	1.08437e+16	9976585567430000	ACAT1|ACLY|DLAT|GCDH|MMUT|OGDH|PDHA1|PDHB|SUCLA2|PANK2|FITM2	-6463310397144770	35.0	0.0	0.0
1	0	0	0	1	-2.28521e+16	0.0	0.0	0.0	-5750235953559980	GO:0035235	GO Biological Processes	ionotropic glutamate receptor signaling pathway	19_GO:0050896 response to stimulus	-815664064350359	1.10154e+16	973212105165722	APP|CLN3|PTK2B|GRIA2|GRIA3|GRID2|GRIK2|GRIK5|GRIN1|PLP1	-6318627688273740	90.0	0.0	0.0
0	0	0	1	0	0.0	0.0	0.0	-8150499422827440	0.0	R-HSA-5658442	Reactome Gene Sets	Regulation of RAS by GAPs		-8150499422827440	1.53957e+16	1.10665e+16	PSMA7|PSMC4|PSMC5|PSMC6|PSMD2|CUL3|PSMF1|PSMD6|PSME3	-6429307313983720	52.0	0.0	0.0
1	0	0	1	0	-2.6032e+16	0.0	0.0	-8142467267332020	0.0	R-HSA-4086400	Reactome Gene Sets	PCP/CE pathway		-8142467267332020	1.26438e+16	1041562623298810	AP2A1|CLTC|PSMA7|PSMC4|PSMC5|PSMC6|PSMD2|PSMF1|PSMD6|PSME3	-6422298231945880	52.0	0.0	0.0
1	0	0	1	1	-3.69437e+16	0.0	0.0	-6299956974438650	-3145155622262330	GO:1905037	GO Biological Processes	autophagosome organization	19_GO:0008152 metabolic process	-8112316481002790	5548519381852710	812744884144444	ATP2A2|CLN3|CTSD|GBA1|PSEN1|RAB1A|RAB7A|ATG13|WDR45|PACS2|ATP13A2|ZFYVE26|STX12|UBQLN2|UBQLN1|ATG2B|SPG11	-6278306268226620	103.0	1.0	1.0
1	0	0	0	0	-809943363770742	0.0	0.0	0.0	0.0	GO:0006259	GO Biological Processes	DNA metabolic process	19_GO:0008152 metabolic process	-809943363770742	3.02925e+16	704058548639699	PARP1|ATM|ATR|DDB1|DDX1|DKC1|DNMT1|ERCC4|ATXN3|MLH1|MRE11|PRKDC|RFC1|HLTF|VCP|XRCC1|XRCC4|CUL4B|RUVBL1|LONP1|AP5Z1|STUB1|PNKP|SETX|ZFYVE26|ORC3|RRM2B|EXOSC3|APTX|ADPRS|DMAP1|TWNK|MMS19|CTC1|RNF168	-6383332964455680	85.0	0.0	0.0
0	0	0	1	1	0.0	0.0	0.0	-8052284036890000	-4232063009938970	hsa04145	KEGG Pathway	Phagosome		-8052284036890000	9183400809716590	9418557950491170	ACTB|ATP6V1A|ATP6AP1|CANX|RAB7A|STX7|ATP6V0D1|TUBB4A|STX12|DYNC1LI1|ATP6V1D|ATP6V1H	-6.3382e+16	93.0	0.0	0.0
1	0	0	1	0	-2.22553e+16	0.0	0.0	-8050228060577660	0.0	R-HSA-1236978	Reactome Gene Sets	Cross-presentation of soluble exogenous antigens (endosomes)		-8050228060577660	1.89915e+16	1.17369e+16	PSMA7|PSMC4|PSMC5|PSMC6|PSMD2|PSMF1|PSMD6|PSME3	-6337153841956120	52.0	0.0	0.0
1	0	0	1	0	-5942920601586720	0.0	0.0	-2.68289e+16	0.0	GO:0034248	GO Biological Processes	regulation of amide metabolic process	19_GO:0008152 metabolic process	-8044048776544800	2.3549e+16	6618186872344130	AARS1|ABCA2|APLP1|APP|CALR|DDX1|EIF4G2|EPRS1|PTK2B|FECH|MTOR|MLH1|NCBP1|NTRK2|PARN|PRKDC|EIF2AK2|DNAJC3|PRNP|RPS6KA3|RTN2|ATXN2|WFS1|FXR1|PLA2G6|ELP1|EIF2B4|EIF2B2|EIF2B5|NEURL1|ABCG1|PUM1|CTIF|LRPPRC|TRAP1|RTN3|GCN1|CNOT1|NMNAT2|PUM2|METTL5|EXOSC3|DHX29|PTCD3|SAMD4B|NAT10|ELP2|CELF4|RTN4|FTO|ATCAY|NHLRC1|PAIP2B	-6211364654820020	104.0	1.0	1.0
0	1	1	0	1	0.0	-285021170660219	-7177452305686990	0.0	-2612473841275350	GO:2000463	GO Biological Processes	positive regulation of excitatory postsynaptic potential	19_GO:0048518 positive regulation of biological process	-8039724188048030	938089330024814	9256635986168090	DLG4|PTK2B|GRIN1|RELN|NRXN1|RIMS2|RIMS1|CUX2|TBC1D24|SHANK3|STX1B	-6209680162489460	43.0	0.0	0.0
1	0	0	1	0	-4064288269215240	0.0	0.0	-5194219440971640	0.0	R-HSA-389661	Reactome Gene Sets	Glyoxylate metabolism and glycine degradation		-8039724188048030	938089330024814	9256635986168090	AMT|BCKDHB|DLAT|DLD|GLDC|GOT2|OGDH|PDHA1|PDHB|PDHX|GRHPR	-6209680162489460	35.0	0.0	0.0
0	0	1	0	0	0.0	0.0	-8038549387719810	0.0	0.0	GO:1901879	GO Biological Processes	regulation of protein depolymerization	19_GO:0050789 regulation of biological process	-8038549387719810	1.50718e+16	1.09273e+16	ADD2|DMTN|MAP1A|MAP1B|SPTB|SPTBN1|APC2|TMOD2|CARMIL2	-6327481151795870	36.0	0.0	0.0
0	0	1	0	0	0.0	0.0	-8038549387719810	0.0	0.0	GO:1902414	GO Biological Processes	protein localization to cell junction	19_GO:0051179 localization	-8038549387719810	1.50718e+16	1.09273e+16	DLG4|MAP1A|BSN|NRXN1|NRXN2|SLITRK3|NSG1|STX1B|LRRTM1	-6327481151795870	63.0	0.0	0.0
1	1	0	1	0	-8031380596265690	-3.31293e+16	0.0	-3.887e+16	0.0	GO:0009062	GO Biological Processes	fatty acid catabolic process	19_GO:0008152 metabolic process	-8031380596265690	9001190476190470	9321286522340450	ACAA1|ACAT1|ABCD1|AUH|ECHS1|HSD17B4|PCCB|PEX7|PHYH|PEX2|ILVBL|SLC27A4	-6323304067799660	39.0	0.0	0.0
1	0	0	1	1	-8031380596265690	0.0	0.0	-2.96036e+16	-5909592163948330	R-HSA-428157	Reactome Gene Sets	Sphingolipid metabolism		-8031380596265690	9001190476190470	9321286522340450	ASAH1|GALC|B4GALNT1|GBA1|GLB1|HEXA|HEXB|CTSA|PSAP|SMPD1|SPTLC1|FA2H	-6323304067799660	49.0	0.0	0.0
1	0	1	1	0	-2.61587e+16	0.0	-6552612650165870	-2.67042e+16	0.0	GO:0048278	GO Biological Processes	vesicle docking	19_GO:0051179 localization	-8025744849767060	6294538794538790	8340854577830410	CLN3|SNAP25|STXBP1|STX7|PPFIA3|USO1|SNPH|CPLX2|UNC13A|EXOC6B|STX12|EXOC1|VPS11|STX1B|RAB3C	-6197014878106320	71.0	0.0	0.0
1	0	0	1	1	-4941887587018840	0.0	0.0	-2.40431e+16	-6420844297439680	GO:0051235	GO Biological Processes	maintenance of location	19_GO:0051179 localization	-8021516911873250	3.82038e+16	7376263743975190	ATP7B|CALR|FTL|B4GALNT1|GBA1|GRIK5|HEXA|HEXB|LIPA|NPC1|PAFAH1B1|PSEN1|RANGAP1|RIT2|HSP90B1|GPAA1|CDS2|NPC2|RER1|VPS13A|SYNE1|CCDC22|VPS13C|VPS13D|FITM2	-6194097030140830	105.0	1.0	1.0
1	0	0	0	1	-8008706072363920	0.0	0.0	0.0	-3.17768e+16	R-HSA-3781860	Reactome Gene Sets	Diseases associated with N-glycosylation of proteins		-8008706072363920	23628125	1241252269690430	DPAGT1|GLB1|CTSA|MAN1B1|ALG6|ALG1|ALG8	-6302612627169580	42.0	0.0	0.0
1	1	0	1	1	-2.25122e+16	-4118078011009300	0.0	-5221597569833930	-2.31091e+16	R-HSA-5663202	Reactome Gene Sets	Diseases of signal transduction by growth factor receptors and second messengers		-7992445854010890	2.62539e+16	6754482966900540	ACTB|ADAM10|ARRB1|ATIC|BCR|CALM1|CLCN6|CLTC|CREBBP|DUSP8|MTOR|GSK3B|MECP2|NCBP1|NF1|PDPK1|PHB1|PIK3R1|PIK3R2|POLR2A|PSEN1|PSEN2|PSMA7|PSMC4|PSMC5|PSMC6|PSMD1|PSMD2|PSMD3|SEL1L|SPTBN1|VCP|FXR1|TNKS|SQSTM1|NEURL1|PSMF1|PSMD6|PSME3|NCSTN|WDR48|SYVN1|KSR2	-6.16763e+16	52.0	0.0	0.0
0	1	1	0	0	0.0	-7.98953e+16	-238767247260118	0.0	0.0	GO:0043087	GO Biological Processes	regulation of GTPase activity	19_GO:0065007 biological regulation	-7.98953e+16	6126297665468170	83647033860067	RAPGEF1|ARHGAP35|MMUT|NF1|CDKL5|TBC1D5|APC2|DOCK9|LARS1|TBC1D13|RALGAPB|TBC1D17|AGAP2|AGAP3|DAB2IP|C9orf72	-6286397066904100	91.0	0.0	0.0
1	0	0	1	0	-4094047262874570	0.0	0.0	-6148405454548940	0.0	R-HSA-5358351	Reactome Gene Sets	Signaling by Hedgehog		-7986258050642980	408088890974797	7474823662073290	ADCY5|ARRB1|GSK3B|PSMA7|PSMC4|PSMC5|PSMC6|PSMD1|PSMD2|PSMD3|SEL1L|TUBB2A|VCP|CUL3|OFD1|PSMF1|PSMD6|PSME3|TUBB4A|RPGRIP1L|IFT172|MKS1|SYVN1	-616274489224337	52.0	0.0	0.0
1	0	0	1	0	-2194337940961720	0.0	0.0	-7977727962820180	0.0	R-HSA-211733	Reactome Gene Sets	Regulation of activated PAK-2p34 by proteasome mediated degradation		-7977727962820180	1861169230769230	1.16059e+16	PSMA7|PSMC4|PSMC5|PSMC6|PSMD2|PSMF1|PSMD6|PSME3	-6275573723606790	52.0	0.0	0.0
1	0	0	1	1	-7.97056e+16	0.0	0.0	-2485531878470300	-3693446428486480	GO:0051604	GO Biological Processes	protein maturation	19_GO:0008152 metabolic process	-7.97056e+16	4770949015648660	7815165601475050	PARP1|ATP7B|CLN3|CLN5|FXN|GLG1|PRCP|PSEN1|PSEN2|SPG7|WFS1|PMPCB|STUB1|PITRM1|AFG3L2|PMPCA|NCSTN|IFT172|MMS19|HM13	-6270365519431460	106.0	1.0	1.0
0	0	0	1	1	0.0	0.0	0.0	-79588943052097	-4.12744e+16	GO:0061795	GO Biological Processes	Golgi lumen acidification	19_GO:0042592 homeostatic process	-79588943052097	5816153846153840	1683489564826040	ATP6V1A|ATP6AP1|ATP6AP2|ATP6V1D|ATP6V1H	-6260643862905170	93.0	0.0	0.0
1	0	0	0	0	-7941520630551850	0.0	0.0	0.0	0.0	GO:0006303	GO Biological Processes	double-strand break repair via nonhomologous end joining	19_GO:0050896 response to stimulus	-7941520630551850	1.41298e+16	1.05646e+16	ATM|ERCC4|MLH1|MRE11|PRKDC|XRCC1|XRCC4|PNKP|RNF168	-6244240679113540	85.0	0.0	0.0
0	1	1	0	1	0.0	-3.81858e+16	-5498129200542120	0.0	-3207192704768670	GO:0021700	GO Biological Processes	developmental maturation	19_GO:0032502 developmental process	-7932589570345800	3.14493e+16	7006296344296850	APP|RERE|ATP6V1A|ATP6V0A1|ATP6AP1|CLN5|DLD|DLG4|PTK2B|GBA1|MAP1B|MECP2|NF1|NRCAM|PALM|PTPRN|STXBP1|BAP1|AP3D1|ATP6V0D1|WASHC5|ATP6AP2|UNC13A|SEZ6L|TRPC4AP|SEZ6L2|ATP6V1D|ACTL6B|ATP6V1H|SYBU|IGSF21|SNX19	-6110609524804310	107.0	1.0	1.0
1	0	0	1	1	-5148418004232300	0.0	0.0	-2895561119275670	-2.13842e+16	GO:0032984	GO Biological Processes	protein-containing complex disassembly	19_GO:0009987 cellular process	-7931537589369430	4214604236343360	7.50446e+16	APEH|ATP2A2|CALM1|CLN3|DHX8|GSK3B|LAMP2|PEX10|PEX2|SH3GL2|VCP|SYNJ1|CKAP5|DNAJC6|DSTN|CHMP4A|UBQLN1|PIK3R4|CHMP5|SNX14|VPS16|MFSD8	-6110609524804310	21.0	0.0	0.0
1	0	0	1	1	-4166777431276610	0.0	0.0	-2.49178e+16	-7922735281347460	GO:0006869	GO Biological Processes	lipid transport	19_GO:0051179 localization	-7922735281347460	5.6501e+16	8147919513532000	ABCA3|SCARB2|CLN3|CLN8|LIPA|NPC1|PSAP|SLC2A1|ABCG1|VPS13A|ATP11A|VPS13C|ARL8B|TMEM30A|ANO3|SPNS1|BLTP1	-6227389829686350	79.0	0.0	0.0
1	0	0	1	0	-2.16388e+16	0.0	0.0	-7906846635448390	0.0	R-HSA-350562	Reactome Gene Sets	Regulation of ornithine decarboxylase (ODC)		-7906846635448390	1.82468e+16	1.14787e+16	PSMA7|PSMC4|PSMC5|PSMC6|PSMD2|PSMF1|PSMD6|PSME3	-6213427104823310	52.0	0.0	0.0
0	1	1	1	1	0.0	-3.13795e+16	-3.80952e+16	-4947390323881260	-2.83896e+16	GO:1901699	GO Biological Processes	cellular response to nitrogen compound	19_GO:0050896 response to stimulus	-7901298385994590	2289824348879460	6513051560373510	ACTB|ADCY5|PARP1|APLP1|APP|ATP1A3|HCN2|CACNA1A|CHRNB2|DDC|DNMT1|DMTN|EPRS1|FOLR1|MTOR|GLRA1|GNAO1|RAPGEF1|GSK3B|HPCA|ITPR1|LRP1|MAP1B|NTRK2|PDPK1|PIK3R1|PIK3R2|PRKDC|PRNP|LGMN|PSEN1|RANGAP1|RAP1GDS1|TAF1|TH|HSP90B1|YWHAG|AIFM1|NEURL1|RAPGEF2|RRAGB|SLC27A4|HRH3|WDTC1|PLCB1|NCSTN|SLC39A14|BACE1|NSG1|CHMP5|LARS1|SMPD3|SLC30A10|ARID1B|PPP1R1B	-6081657120835790	100.0	0.0	0.0
1	0	0	0	1	-6437735560347800	0.0	0.0	0.0	-6514040561640700	GO:0007628	GO Biological Processes	adult walking behavior	19_GO:0032501 multicellular organismal process	-7871903879749370	9087740384615380	9075935600415960	DAB1|CLN8|FXN|GLRA1|GLRB|HEXA|KCNJ10|NPC1|SCN1A|UCHL1|ABHD12	-6053545612516000	12.0	0.0	0.0
0	1	1	0	1	0.0	-2732299114065060	-3916962327293710	0.0	-3.92279e+16	GO:0040008	GO Biological Processes	regulation of growth	19_GO:0040007 growth	-7.85054e+16	2302582900969990	6497680019877570	ADAM10|APP|DDR1|CDH4|MEGF8|EIF4G2|PTK2B|FXN|MTOR|GAP43|GDI1|GSK3B|L1CAM|MAG|MAP1B|MAPT|NCBP1|NDUFS3|NRCAM|PAFAH1B1|PHB1|PPT1|LGMN|RPS6KA3|SLC6A3|SLIT1|CDKL5|TKT|TNR|WFS1|BAP1|ATRN|CTDP1|MAP3K13|RIMS2|CLSTN3|SLC23A2|SEMA6B|AFG3L2|FAM107A|CLSTN1|RUFY3|RIMS1|UNC13A|SPART|PLCB1|ATAD3A|RTN4|PAK5|FTO|BLTP1|SYT3|ARX|BRAT1	-6033465487261260	38.0	0.0	0.0
1	0	1	0	1	-3234991592999300	0.0	-3.08298e+16	0.0	-7838451596832880	GO:0043524	GO Biological Processes	negative regulation of neuron apoptotic process	19_GO:0048519 negative regulation of biological process	-7838451596832880	8789518296965440	9165121712130030	CLN3|CLN8|GBA1|GRN|PPT1|PRKCG|PSEN1|STXBP1|SYNGAP1|FAIM2|DNAJC5|AGAP2	-6158275053132130	44.0	0.0	0.0
1	1	0	0	0	-7838179763030990	-3.35615e+16	0.0	0.0	0.0	GO:0009083	GO Biological Processes	branched-chain amino acid catabolic process	19_GO:0008152 metabolic process	-7838179763030990	2250297619047610	1.20868e+16	ACAT1|AUH|BCKDHB|DLD|ECHS1|HIBCH|MCCC1	-6158275053132130	73.0	0.0	0.0
1	1	0	0	0	-7838179763030990	-4853290839620890	0.0	0.0	0.0	R-HSA-70895	Reactome Gene Sets	Branched-chain amino acid catabolism		-7838179763030990	2250297619047610	1.20868e+16	ACAT1|AUH|BCKDHB|DLD|ECHS1|HIBCH|MCCC1	-6158275053132130	73.0	0.0	0.0
1	0	0	1	0	-2134127054609410	0.0	0.0	-7837516138002480	0.0	R-HSA-180534	Reactome Gene Sets	Vpu mediated degradation of CD4		-7837516138002480	1789585798816560	1.13551e+16	PSMA7|PSMC4|PSMC5|PSMC6|PSMD2|PSMF1|PSMD6|PSME3	-6158275053132130	52.0	0.0	0.0
1	0	0	1	0	-2.99035e+16	0.0	0.0	-7837516138002480	0.0	R-HSA-349425	Reactome Gene Sets	Autodegradation of the E3 ubiquitin ligase COP1		-7837516138002480	1789585798816560	1.13551e+16	PSMA7|PSMC4|PSMC5|PSMC6|PSMD2|PSMF1|PSMD6|PSME3	-6158275053132130	52.0	0.0	0.0
1	0	0	1	0	-2134127054609410	0.0	0.0	-7837516138002480	0.0	R-HSA-69601	Reactome Gene Sets	Ubiquitin Mediated Degradation of Phosphorylated Cdc25A		-7837516138002480	1789585798816560	1.13551e+16	PSMA7|PSMC4|PSMC5|PSMC6|PSMD2|PSMF1|PSMD6|PSME3	-6158275053132130	52.0	0.0	0.0
1	0	0	1	0	-2134127054609410	0.0	0.0	-7837516138002480	0.0	R-HSA-69610	Reactome Gene Sets	p53-Independent DNA Damage Response		-7837516138002480	1789585798816560	1.13551e+16	PSMA7|PSMC4|PSMC5|PSMC6|PSMD2|PSMF1|PSMD6|PSME3	-6158275053132130	52.0	0.0	0.0
1	0	0	1	0	-2134127054609410	0.0	0.0	-7837516138002480	0.0	R-HSA-69613	Reactome Gene Sets	p53-Independent G1/S DNA damage checkpoint		-7837516138002480	1789585798816560	1.13551e+16	PSMA7|PSMC4|PSMC5|PSMC6|PSMD2|PSMF1|PSMD6|PSME3	-6158275053132130	52.0	0.0	0.0
1	0	0	1	0	-2134127054609410	0.0	0.0	-7837516138002480	0.0	R-HSA-75815	Reactome Gene Sets	Ubiquitin-dependent degradation of Cyclin D		-7837516138002480	1789585798816560	1.13551e+16	PSMA7|PSMC4|PSMC5|PSMC6|PSMD2|PSMF1|PSMD6|PSME3	-6158275053132130	52.0	0.0	0.0
1	0	0	1	0	-2134127054609410	0.0	0.0	-7837516138002480	0.0	R-HSA-9762114	Reactome Gene Sets	GSK3B and BTRC:CUL1-mediated-degradation of NFE2L2		-7837516138002480	1789585798816560	1.13551e+16	PSMA7|PSMC4|PSMC5|PSMC6|PSMD2|PSMF1|PSMD6|PSME3	-6158275053132130	52.0	0.0	0.0
0	0	0	1	1	0.0	0.0	0.0	-2.62062e+16	-7014606486733370	GO:0072666	GO Biological Processes	establishment of protein localization to vacuole	19_GO:0051179 localization	-782658363203937	6100860677783750	8162565323235820	SCARB2|LAMP2|SORT1|RAB7A|STAM|SQSTM1|AP3D1|VPS13A|PTPN23|VPS41|PIK3R4|VPS13C|VPS13D|CACNG8|GNPTG	-601078004559541	76.0	0.0	0.0
0	0	1	0	1	0.0	0.0	-3.60369e+16	0.0	-7258559197526560	GO:1905475	GO Biological Processes	regulation of protein localization to membrane	19_GO:0051179 localization	-7817176922593330	3.73405e+16	7233137837778730	ACTB|ADAM10|CDH2|CLN3|CLTC|DLG4|DMTN|GDI1|HPCA|LRP1|PDPK1|PIK3R1|PIK3R2|PRNP|SPTBN1|STX7|SQSTM1|TMEM59|CPLX1|RER1|IQSEC2|MTCL1|FRRS1L|ATP2C1|NHLRC1	-6002645063213010	108.0	1.0	1.0
0	0	1	0	0	0.0	0.0	-7810963659877150	0.0	0.0	GO:0006904	GO Biological Processes	vesicle docking involved in exocytosis	19_GO:0051179 localization	-7810963659877150	2.40032e+16	1.24741e+16	STXBP1|PPFIA3|SNPH|CPLX2|UNC13A|STX1B|RAB3C	-6136347693074780	71.0	0.0	0.0
1	0	0	1	0	-7794338289717760	0.0	0.0	-3.77333e+16	0.0	GO:0106074	GO Biological Processes	aminoacyl-tRNA metabolism involved in translational fidelity	19_GO:0008152 metabolic process	-7794338289717760	3115796703296700	1.33358e+16	AARS1|LARS1|IARS2|VARS2|AARS2|TARS2	-6.12064e+16	8.0	0.0	0.0
1	0	0	1	0	-3.1458e+16	0.0	0.0	-5242990489411660	0.0	GO:1903050	GO Biological Processes	regulation of proteolysis involved in protein catabolic process	19_GO:0008152 metabolic process	-7773444547116080	3.31894e+16	7014867866005290	PTK2B|FHIT|GBA1|GSK3B|MAP1A|ATXN3|OPHN1|PRKCG|PSEN1|PSMC4|PSMC5|PSMC6|TAF1|UBE3A|VCP|WFS1|USP5|USP9X|PSMF1|BCAP31|PSME3|STUB1|ZER1|UFL1|CCDC22|UBQLN2|UBQLN1|DAB2IP|TRIM67	-5961445024251150	46.0	0.0	0.0
0	0	1	0	1	0.0	0.0	-5080471432943440	0.0	-4609778463498400	GO:0043113	GO Biological Processes	receptor clustering	19_GO:0051179 localization	-7.7702e+16	7.93112e+16	8697212175601140	CDH2|DLG4|GLRB|GRIK5|RELN|THY1|SYNGAP1|NRXN1|NRXN2|RER1|SLITRK3|SHANK3	-595945673320128	63.0	0.0	0.0
1	1	0	1	0	-4893283385147020	-3241731248668900	0.0	-7.76967e+16	0.0	GO:0033866	GO Biological Processes	nucleoside bisphosphate biosynthetic process	19_GO:0008152 metabolic process	-7.76967e+16	1.75582e+16	1123483352173010	ACAT1|ACLY|DLAT|GCDH|MMUT|PDHA1|PDHB|PANK2	-6098721715360300	35.0	0.0	0.0
1	1	0	1	0	-4893283385147020	-3241731248668900	0.0	-7.76967e+16	0.0	GO:0034030	GO Biological Processes	ribonucleoside bisphosphate biosynthetic process	19_GO:0008152 metabolic process	-7.76967e+16	1.75582e+16	1123483352173010	ACAT1|ACLY|DLAT|GCDH|MMUT|PDHA1|PDHB|PANK2	-6098721715360300	35.0	0.0	0.0
1	1	0	1	0	-4893283385147020	-3241731248668900	0.0	-7.76967e+16	0.0	GO:0034033	GO Biological Processes	purine nucleoside bisphosphate biosynthetic process	19_GO:0008152 metabolic process	-7.76967e+16	1.75582e+16	1123483352173010	ACAT1|ACLY|DLAT|GCDH|MMUT|PDHA1|PDHB|PANK2	-6098721715360300	35.0	0.0	0.0
1	1	0	1	0	-749662941438589	-7292746893500860	0.0	-3.11267e+16	0.0	hsa00280	KEGG Pathway	Valine, leucine and isoleucine degradation		-7767903734342190	7160037878787870	846853419508153	ACAA1|ACAT1|ALDH2|AUH|BCKDHB|DLD|ECHS1|ALDH6A1|MMUT|PCCA|PCCB|HIBCH|MCCC1	-5958421867698510	73.0	0.0	0.0
1	0	0	1	0	-2288296628840720	0.0	0.0	-7766925690963050	0.0	R-HSA-1234174	Reactome Gene Sets	Cellular response to hypoxia		-7766925690963050	1395876923076920	1.04633e+16	PSMA7|PSMC4|PSMC5|PSMC6|PSMD2|CUL2|PSMF1|PSMD6|PSME3	-6097795622138720	52.0	0.0	0.0
0	0	0	1	1	0.0	0.0	0.0	-2.94973e+16	-7.731e+16	GO:0061462	GO Biological Processes	protein localization to lysosome	19_GO:0051179 localization	-7.731e+16	1.73579e+16	1.11633e+16	SCARB2|LAMP2|SORT1|LMBRD1|RTN4|CACNG8|MFSD1|GNPTG	-6064586983713470	76.0	0.0	0.0
1	0	1	0	0	-3708316855779040	0.0	-4318366966242250	0.0	0.0	WP5265	WikiPathways	Neurogenesis regulation in the olfactory epithelium		-7719347544323870	649331370384002	8230776400507920	APP|DAB1|GSK3B|MAP1B|MAPT|MECP2|MRE11|NTRK2|PAFAH1B1|RELN|PSEN1|VLDLR|NEURL1|RTN4	-5913615005846590	109.0	1.0	1.0
1	0	0	1	0	-2.07664e+16	0.0	0.0	-7703256521543660	0.0	R-HSA-180585	Reactome Gene Sets	Vif-mediated degradation of APOBEC3G		-7703256521543660	1.7233e+16	1.11178e+16	PSMA7|PSMC4|PSMC5|PSMC6|PSMD2|PSMF1|PSMD6|PSME3	-603954391775162	52.0	0.0	0.0
1	0	0	1	0	-2.07664e+16	0.0	0.0	-7703256521543660	0.0	R-HSA-8854050	Reactome Gene Sets	FBXL7 down-regulates AURKA during mitotic entry and in early mitosis		-7703256521543660	1.7233e+16	1.11178e+16	PSMA7|PSMC4|PSMC5|PSMC6|PSMD2|PSMF1|PSMD6|PSME3	-603954391775162	52.0	0.0	0.0
1	0	0	1	0	-2.07664e+16	0.0	0.0	-7703256521543660	0.0	R-HSA-9604323	Reactome Gene Sets	Negative regulation of NOTCH4 signaling		-7703256521543660	1.7233e+16	1.11178e+16	PSMA7|PSMC4|PSMC5|PSMC6|PSMD2|PSMF1|PSMD6|PSME3	-603954391775162	52.0	0.0	0.0
0	0	0	1	0	0.0	0.0	0.0	-7698712901239110	0.0	GO:0000338	GO Biological Processes	protein deneddylation	19_GO:0008152 metabolic process	-7698712901239110	5287412587412580	160236273448534	TOR1A|COPS8|COPS5|COPS7A|COPS4	-6035896674404920	66.0	0.0	0.0
1	0	0	1	0	-7692933991155470	0.0	0.0	-2.45937e+16	0.0	GO:0034470	GO Biological Processes	ncRNA processing	19_GO:0008152 metabolic process	-7692933991155470	3885405960945520	7275161255154050	AARS1|DDX1|DKC1|NCBP1|PARN|PRKDC|ELP1|PUM1|NOP56|TBL3|PWP1|UTP20|EXOSC3|TRNT1|DUS2|NAT10|ELP2|AARS2|ELAC2|THADA|WDR75|INTS4|MTFMT|TSEN54	-6031012294981310	45.0	0.0	0.0
1	0	0	0	0	-7677412268004620	0.0	0.0	0.0	0.0	GO:0015919	GO Biological Processes	peroxisomal membrane transport	19_GO:0051179 localization	-7677412268004620	2.14801e+16	1.1783e+16	ABCD1|PEX6|PEX7|PEX10|PEX2|USP9X|PEX3	-6016383263782800	37.0	0.0	0.0
1	0	0	1	1	-7674819098045800	0.0	0.0	-2.72206e+16	-4818381166912860	GO:0006687	GO Biological Processes	glycosphingolipid metabolic process	19_GO:0008152 metabolic process	-7674819098045800	1.1067e+16	9650678761935240	ABCA2|GALC|B4GALNT1|GBA1|GLB1|HEXA|HEXB|SMPD1|CLN6|FA2H	-6.01474e+16	49.0	0.0	0.0
0	0	0	0	1	0.0	0.0	0.0	0.0	-7673824905867300	GO:0034975	GO Biological Processes	protein folding in endoplasmic reticulum	19_GO:0009987 cellular process	-7673824905867300	5227099896301410	1.59292e+16	CALR|CANX|PDIA3|DNAJC3|HSP90B1	-6.01474e+16	110.0	1.0	1.0
1	0	0	1	0	-7667742105126970	0.0	0.0	-3.18325e+16	0.0	GO:0006120	GO Biological Processes	mitochondrial electron transport, NADH to ubiquinone	19_GO:0008152 metabolic process	-7667742105126970	1.32083e+16	1.01605e+16	DLD|NDUFA10|NDUFS1|NDUFS2|NDUFS3|NDUFV1|NDUFS4|NDUFS8|NDUFS7	-6.01027e+16	18.0	0.0	0.0
0	0	1	0	1	0.0	0.0	-2.27055e+16	0.0	-4479533529481740	GO:1902074	GO Biological Processes	response to salt	19_GO:0050896 response to stimulus	-7665759853478340	2.70616e+16	6644976866048060	ADD1|CALM1|CALR|CHRNB2|DLG4|DMTN|PTK2B|GDI1|GLDC|HPCA|ITPR1|KCNJ10|KCNJ11|ND6|MTTP|PPP2R2A|PRKCG|LGMN|SLC6A1|SLC6A3|SMPD1|TAF1|TMBIM6|TH|HSP90B1|UBE3A|ADAM9|EIF2B5|AIFM1|EFTUD2|HRH3|SYT11|PLCB1|UFL1|NCSTN|SLC25A23|PPP1R1B|SYT3|ARL13B	-5862509004507700	53.0	0.0	0.0
1	0	0	1	1	-4198963660061540	0.0	0.0	-7385095530853260	-2703911521181150	R-HSA-983169	Reactome Gene Sets	Class I MHC mediated antigen processing & presentation		-7665759853478340	2.70616e+16	6644976866048060	CALR|CANX|PDIA3|PSMA7|PSMC4|PSMC5|PSMC6|PSMD1|PSMD2|PSMD3|SEC13|UBA1|UBE2A|UBE3A|CUL3|CUL2|CDC23|UBE4A|PSMF1|NPEPPS|SEC24C|PSMD6|PJA2|HUWE1|BCAP31|PSME3|STUB1|UFL1|ANAPC13|PIK3R4|SAR1B|SEC61A2|RNF130|ANAPC1|FBXO44|UBE2F|FBXL16|FBXO41|KCTD7	-5862509004507700	3.0	0.0	0.0
1	0	0	1	0	-2.23998e+16	0.0	0.0	-7664697691364860	0.0	R-HSA-8852276	Reactome Gene Sets	The role of GTSE1 in G2/M progression after G2 checkpoint		-7664697691364860	1.35962e+16	1.03056e+16	PSMA7|PSMC4|PSMC5|PSMC6|PSMD2|PSMF1|PSMD6|PSME3|TUBB4A	-600810482869577	52.0	0.0	0.0
1	0	0	1	0	-2048845685621770	0.0	0.0	-7638211186866710	0.0	R-HSA-174113	Reactome Gene Sets	SCF-beta-TrCP mediated degradation of Emi1		-7638211186866710	1691972027972020	1.10039e+16	PSMA7|PSMC4|PSMC5|PSMC6|PSMD2|PSMF1|PSMD6|PSME3	-5.98513e+16	52.0	0.0	0.0
1	0	0	1	0	-2048845685621770	0.0	0.0	-7638211186866710	0.0	R-HSA-4641257	Reactome Gene Sets	Degradation of AXIN		-7638211186866710	1691972027972020	1.10039e+16	PSMA7|PSMC4|PSMC5|PSMC6|PSMD2|PSMF1|PSMD6|PSME3	-5.98513e+16	52.0	0.0	0.0
1	0	0	1	0	-2048845685621770	0.0	0.0	-7638211186866710	0.0	R-HSA-8941858	Reactome Gene Sets	Regulation of RUNX3 expression and activity		-7638211186866710	1691972027972020	1.10039e+16	PSMA7|PSMC4|PSMC5|PSMC6|PSMD2|PSMF1|PSMD6|PSME3	-5.98513e+16	52.0	0.0	0.0
1	0	0	1	1	-2.57041e+16	0.0	0.0	-2.81792e+16	-7.63666e+16	GO:0030162	GO Biological Processes	regulation of proteolysis	19_GO:0008152 metabolic process	-7.63666e+16	3.83854e+16	7214918672984050	APLP2|APP|CLN3|CSTB|CTSB|CTSD|CLN8|GBA1|GLG1|GRN|GRIN1|LRP1|SERPINI1|PRKCG|PRNP|PSEN1|RPS6KA3|UBE3A|USP9X|ADAM9|ARL6IP5|UFL1|NCSTN|CLN6	-5.98446e+16	111.0	1.0	1.0
1	1	0	1	0	-706381433868869	-2057592945615160	0.0	-4608453699792090	0.0	GO:0006631	GO Biological Processes	fatty acid metabolic process	19_GO:0008152 metabolic process	-763122379437594	2882545803106550	6.72318e+16	ACAA1|ACAT1|ACLY|ABCD1|AOAH|ASAH1|AUH|CRAT|ECHS1|EPHX1|ETFDH|GCDH|HSD17B4|LIPA|MMUT|PCCA|PCCB|PEX7|PHYH|PLP1|PEX2|ELOVL4|TH|GNPAT|PTGES3|ILVBL|SLC27A4|MGLL|ABHD12|ACAD9|MECR|ABHD6|ELOVL5|FA2H|SCD5	-5829208492417610	39.0	0.0	0.0
1	0	0	0	1	-2495293306212030	0.0	0.0	0.0	-7626256651436430	GO:0006898	GO Biological Processes	receptor-mediated endocytosis	19_GO:0051179 localization	-7626256651436430	8414355930631550	8917101099971600	CANX|SCARB2|CLN3|CLTC|DNM1|FOLR1|IGF2R|LRP1|PPT1|LMBRD1|GPR107|CACNG8	-5.9758e+16	112.0	1.0	1.0
1	0	0	1	0	-2.3944e+16	0.0	0.0	-7596364663969060	0.0	R-HSA-71403	Reactome Gene Sets	Citric acid cycle (TCA cycle)		-7596364663969060	3.17245e+16	1.34242e+16	ACO2|MDH2|ME2|OGDH|SDHA|SUCLA2	-5947644424399850	35.0	0.0	0.0
0	1	1	0	0	0.0	-451950782889903	-73571358878785	0.0	0.0	GO:0030029	GO Biological Processes	actin filament-based process	19_GO:0009987 cellular process	-7583805197671080	2302725749961930	6374244808709970	ACTB|ADD1|ADD2|ANK2|ARRB1|BCR|CALR|CAPZB|CLN3|DPYSL3|DMTN|PTK2B|FGF12|FLII|ARHGAP35|KCND3|ATXN3|NF1|NPHP1|OPHN1|PAFAH1B1|PDPK1|RAP1GDS1|SCN1A|SPTB|SPTBN1|SPTBN2|HSP90B1|CUL3|CACNA1G|BRSK2|CDC42BPB|NUP155|WASHC5|ACTR3|DSTN|FAM107A|NISCH|RUFY3|IQSEC2|PIP5K1C|ATP2C1|TMOD2|MINK1|SCN3B|SRCIN1|FHDC1|PHACTR3|AGAP2|CARMIL2|IQSEC3|CCDC88C	-5785475585289710	113.0	1.0	1.0
1	0	0	1	0	-2021660371549430	0.0	0.0	-7574483669003460	0.0	R-HSA-450408	Reactome Gene Sets	AUF1 (hnRNP D0) binds and destabilizes mRNA		-7574483669003460	1661758241758240	1089293653805290	PSMA7|PSMC4|PSMC5|PSMC6|PSMD2|PSMF1|PSMD6|PSME3	-5930076220406800	52.0	0.0	0.0
1	0	0	1	0	-2844084031668150	0.0	0.0	-7574483669003460	0.0	R-HSA-5362768	Reactome Gene Sets	Hh mutants are degraded by ERAD		-7574483669003460	1661758241758240	1089293653805290	PSMA7|PSMC4|PSMC5|PSMC6|PSMD2|PSMF1|PSMD6|PSME3	-5930076220406800	52.0	0.0	0.0
0	0	1	1	1	0.0	0.0	-3068768725196280	-7013528807229480	-4076800360293860	GO:0016188	GO Biological Processes	synaptic vesicle maturation	19_GO:0032502 developmental process	-7568034592625990	9791504791504790	9061464208591930	ATP6V1A|ATP6V0A1|ATP6AP1|DLG4|STXBP1|ATP6V0D1|ATP6AP2|UNC13A|ATP6V1D|ATP6V1H	-5770926625162410	93.0	0.0	0.0
1	0	0	1	0	-7555264334797010	0.0	0.0	-3.65971e+16	0.0	R-HSA-6811434	Reactome Gene Sets	COPI-dependent Golgi-to-ER retrograde traffic		-7555264334797010	8182900432900430	8777730820298240	KIF1A|COPA|COPB1|TUBB2A|GBF1|ZW10|COPB2|KIF1C|COPG1|KIFAP3|NBAS|RINT1	-5913424151697310	10.0	0.0	0.0
0	0	1	0	1	0.0	0.0	-7048537958236160	0.0	-4.43422e+16	GO:0034329	GO Biological Processes	cell junction assembly	19_GO:0009987 cellular process	-7551526416794940	3.03221e+16	6761484487075840	ACTB|ADD2|ANK2|APP|BCR|CDH2|CDH4|CDH10|PTK2B|GPM6A|GRID2|MAP1B|MECP2|NRCAM|OPHN1|PTPRD|SPTBN2|TBCD|THY1|GNPAT|BSN|NRXN1|NRXN2|CLSTN3|SLITRK3|ADGRL3|PIP5K1C|NPTN|CDH22|SHANK3|SLC25A46|DNER	-5755636667470670	17.0	0.0	0.0
0	0	0	1	1	0.0	0.0	0.0	-7543015383159030	-2624142843141590	R-HSA-8856825	Reactome Gene Sets	Cargo recognition for clathrin-mediated endocytosis		-7543015383159030	1.09739e+16	9578863209660930	AP2A1|CLTC|TOR1A|STAM|COPS8|COPS5|UBQLN2|UBQLN1|COPS7A|COPS4	-5.90288e+16	66.0	0.0	0.0
1	0	0	0	0	-7538112804228910	0.0	0.0	0.0	0.0	WP4946	WikiPathways	DNA repair pathways, full network		-7538112804228910	7313467261904760	8497177594688550	PARP1|ATM|ATR|DDB1|ERCC4|MLH1|MRE11|PRKDC|RFC1|XRCC1|XRCC4|CUL4B|PNKP	-5898824799768290	85.0	0.0	0.0
1	0	0	0	0	-7534829587405900	0.0	0.0	0.0	0.0	R-HSA-9033241	Reactome Gene Sets	Peroxisomal protein import		-7534829587405900	1.07157e+16	9465643613250190	ACAA1|HSD17B4|MPV17|PEX6|PEX7|PEX10|PHYH|PEX2|USP9X|GNPAT	-589638898708126	37.0	0.0	0.0
0	1	1	1	1	0.0	-3312876441132940	-2.07618e+16	-4160010989008130	-217877399147401	hsa04144	KEGG Pathway	Endocytosis		-7525792515017150	3159808319170860	681272830036816	AP2A1|ARRB1|CAPZB|CLTC|DNM1|FOLR1|IGF2R|KIF5A|PSD|SH3GL2|RAB7A|STAM|GBF1|DNAJC6|WASHC5|ACTR3|ARFGEF1|IQSEC2|SPART|PIP5K1C|GIT1|CHMP4A|SPG21|CHMP5|VPS35|SMAP1|AGAP2|AGAP3|WASHC2A|IQSEC3	-5731117576224570	114.0	1.0	1.0
0	1	1	0	1	0.0	-2084416736307880	-4912430412606640	0.0	-3386031848694480	GO:0099173	GO Biological Processes	postsynapse organization	19_GO:0009987 cellular process	-7518181751890560	4566401780038140	742980081551347	ACTB|ADAM10|CDH2|DLG4|GLRB|OPHN1|PRNP|LGMN|RELN|SPTBN2|SYNGAP1|INA|NRXN1|NRXN2|RER1|SLITRK3|SRCIN1|ARHGAP39|SHANK3	-5726718946730110	63.0	0.0	0.0
1	0	0	0	1	-6583609965573520	0.0	0.0	0.0	-6663413853628770	GO:0006672	GO Biological Processes	ceramide metabolic process	19_GO:0008152 metabolic process	-7515370287130460	4806738715829620	7522149744123940	ABCA2|ASAH1|CLN8|GALC|B4GALNT1|GBA1|HEXA|HEXB|NEU1|SMPD1|TM9SF2|SPTLC1|ST8SIA3|CLN6|SMPD3|FA2H|TLCD3B|SPTSSB	-5726718946730110	81.0	0.0	0.0
0	1	1	0	1	0.0	-3124031527070230	-6326948248162320	0.0	-2.75419e+16	GO:0051588	GO Biological Processes	regulation of neurotransmitter transport	19_GO:0051179 localization	-7515370287130460	4806738715829620	7522149744123940	ATP2A2|TOR1A|GFAP|GPM6B|NF1|SEPTIN5|PRKCG|STXBP1|SYN1|RIMS2|RIMS3|CPLX2|CPLX1|RIMS1|SYT11|GIT1|STX1B|RIMS4	-5726718946730110	25.0	0.0	0.0
1	0	0	1	0	-2.80945e+16	0.0	0.0	-7512023939524050	0.0	R-HSA-69541	Reactome Gene Sets	Stabilization of p53		-7512023939524050	1.6326e+16	1.07848e+16	PSMA7|PSMC4|PSMC5|PSMC6|PSMD2|PSMF1|PSMD6|PSME3	-5875273203128790	52.0	0.0	0.0
1	1	0	1	0	-4467024618910450	-2.46814e+16	0.0	-7175243376595030	0.0	GO:0035384	GO Biological Processes	thioester biosynthetic process	19_GO:0008152 metabolic process	-7.50406e+16	7553446553446550	8426660711014990	ACAT1|ACLY|DLAT|DLD|GCDH|MMUT|PDHA1|PDHB|PPT1|ELOVL4|PDHX|ELOVL5	-5717795097908420	35.0	0.0	0.0
1	1	0	1	0	-4467024618910450	-2.46814e+16	0.0	-7175243376595030	0.0	GO:0071616	GO Biological Processes	acyl-CoA biosynthetic process	19_GO:0008152 metabolic process	-7.50406e+16	7553446553446550	8426660711014990	ACAT1|ACLY|DLAT|DLD|GCDH|MMUT|PDHA1|PDHB|PPT1|ELOVL4|PDHX|ELOVL5	-5717795097908420	35.0	0.0	0.0
0	0	0	0	1	0.0	0.0	0.0	0.0	-5754971256015180	GO:1990535	GO Biological Processes	neuron projection maintenance	19_GO:0009987 cellular process	-7502737861434940	1682358550540360	1.04073e+16	ABCD1|APP|ATP1A3|MAP1A|PRNP|PSEN1|KIFBP	-5.71766e+16	101.0	0.0	0.0
1	0	0	0	0	-7498818323205600	0.0	0.0	0.0	0.0	GO:0051054	GO Biological Processes	positive regulation of DNA metabolic process	19_GO:0048518 positive regulation of biological process	-7498818323205600	4470789971617780	7432995353895440	PARP1|ATM|ATR|DKC1|MECP2|MLH1|MRE11|PARN|PRKCG|PRKDC|XRCC1|USP9X|RUVBL1|PNKP|EXOSC3|TMEM161A|DMAP1|MMS19|CTC1|RNF168	-5863750900863090	115.0	1.0	1.0
1	0	0	1	1	-2809354000891000	0.0	0.0	-6229777102252820	-5245521153028570	GO:1902600	GO Biological Processes	proton transmembrane transport	19_GO:0051179 localization	-7473555238111750	3.98367e+16	7165341850990770	ATP1A3|ATP5F1B|ATP6V1A|ATP6V0C|ATP6V0A1|ATP6AP1|COX15|ATP6|SLC11A2|SURF1|UQCRC1|ATP6V0D1|SLC33A1|ATP6AP2|SLC9A6|SLC9A8|SLC17A5|GHITM|ATP6V1D|ATP6V1H|SLC4A10|NDUFS7	-5690845091348810	93.0	0.0	0.0
1	0	0	1	0	-2338457546908570	0.0	0.0	-7468217748057420	0.0	GO:0045116	GO Biological Processes	protein neddylation	19_GO:0008152 metabolic process	-7468217748057420	3034515050167220	1.31099e+16	COPS8|COPS5|COPS7A|COPS4|AKTIP|UBE2F	-5835663126255760	66.0	0.0	0.0
1	0	1	0	0	-4241090805853830	0.0	-4534128160679600	0.0	0.0	GO:0010639	GO Biological Processes	negative regulation of organelle organization	19_GO:0048519 negative regulation of biological process	-7467810059209040	2.79101e+16	6594724688540500	ADD1|ADD2|PARP1|ATM|CAPZB|CTNNA2|DMTN|ERCC4|FLII|FXN|MAP1B|MAPT|OPA1|PIK3R1|ATXN7|SPTB|SPTBN1|SPTBN2|TBCD|XRCC1|RAB7A|TNKS|ZW10|FEZ2|HUWE1|APC2|TUBB4A|ARFGEF1|GHITM|TMOD2|NAT10|CTC1|SHANK3|TMEM67|TTBK2|TOM1L2	-568627845993165	36.0	0.0	0.0
1	0	0	1	0	-7.46677e+16	0.0	0.0	-472546071276978	0.0	GO:0042776	GO Biological Processes	proton motive force-driven mitochondrial ATP synthesis	19_GO:0008152 metabolic process	-7.46677e+16	1.05483e+16	9376214269418640	ATP6|NDUFA10|NDUFS1|NDUFS2|NDUFS3|NDUFV1|NDUFS4|NDUFS8|SDHA|NDUFS7	-5835054079125950	18.0	0.0	0.0
0	1	0	1	0	0.0	-7444115741038210	0.0	-2.84617e+16	0.0	GO:0051345	GO Biological Processes	positive regulation of hydrolase activity	19_GO:0065007 biological regulation	-7444115741038210	4645775729646690	7470087016477800	CALM1|RAPGEF1|ARHGAP35|MMUT|NF1|PDPK1|LGMN|CDKL5|TBC1D5|APC2|DOCK9|CYFIP2|LARS1|TBC1D13|RALGAPB|TBC1D17|AGAP2|AGAP3|C9orf72	-5813228278604010	91.0	0.0	0.0
1	0	0	0	0	-7442448385902930	0.0	0.0	0.0	0.0	GO:0007031	GO Biological Processes	peroxisome organization	19_GO:0009987 cellular process	-7442448385902930	1.54306e+16	1047425309367230	ABCD1|PEX6|PEX7|PEX10|PEX2|USP9X|PEX3|TMEM135	-5813221707450200	37.0	0.0	0.0
1	0	0	0	1	-3.47308e+16	0.0	0.0	0.0	-7438664479608060	GO:0042982	GO Biological Processes	amyloid precursor protein metabolic process	19_GO:0008152 metabolic process	-7438664479608060	2.9999e+16	1.30305e+16	ADAM10|CLN3|PSEN1|ABCG1|NCSTN|BACE1	-5811092258325340	95.0	0.0	0.0
1	0	0	0	0	-7424199780209350	0.0	0.0	0.0	0.0	R-HSA-72731	Reactome Gene Sets	Recycling of eIF2:GDP		-7424199780209350	4219308035714280	1.42883e+16	EIF2B1|EIF2B4|EIF2B3|EIF2B2|EIF2B5	-5798275737306710	77.0	0.0	0.0
1	0	0	0	0	-7421925226191380	0.0	0.0	0.0	0.0	GO:0051052	GO Biological Processes	regulation of DNA metabolic process	19_GO:0008152 metabolic process	-7421925226191380	3419776869471990	6911188681989480	PARP1|ATM|ATR|DKC1|ERCC4|KPNA1|MECP2|MLH1|MPV17|MRE11|PARN|PRKCG|PRKDC|ATXN7|XRCC1|USP9X|RUVBL1|AIFM1|PNKP|ORC3|EXOSC3|TMEM161A|NAT10|DMAP1|MMS19|CTC1|RNF168	-5797394363823310	115.0	0.0	0.0
1	0	0	1	0	-3661117780256660	0.0	0.0	-7.42168e+16	0.0	R-HSA-9013694	Reactome Gene Sets	Signaling by NOTCH4		-7.42168e+16	127671669793621	9935805899057210	PSMA7|PSMC4|PSMC5|PSMC6|PSMD2|PSMF1|PSMD6|PSME3|NCSTN	-5797394363823310	52.0	0.0	0.0
0	1	1	0	1	0.0	-3.30572e+16	-5839203554040910	0.0	-4090953129243110	WP2267	WikiPathways	Synaptic vesicle pathway		-7421237342877170	6738859180035650	8132732263411350	AP2A1|CACNA1A|CLTC|DNM1|CLN8|SNAP25|STXBP1|SYN1|CPLX2|CPLX1|RIMS1|UNC13A|STX1B	-5643222317322610	57.0	0.0	0.0
1	0	1	0	0	-3293699300649430	0.0	-6678052645458080	0.0	0.0	GO:0043244	GO Biological Processes	regulation of protein-containing complex disassembly	19_GO:0050789 regulation of biological process	-7419404203493840	429870942066064	7268434412526160	ADD1|ADD2|CAPZB|CLN3|DMTN|FLII|GBA1|MAP1A|MAP1B|ATXN7|SPTB|SPTBN1|SPTBN2|RUBCN|APC2|DSTN|SETX|TMOD2|TTBK2|CARMIL2	-5642555069866070	36.0	0.0	0.0
1	0	1	0	0	-2.70976e+16	0.0	-5417741248787670	0.0	0.0	GO:0060291	GO Biological Processes	long-term synaptic potentiation	19_GO:0048518 positive regulation of biological process	-7412304176960880	6168648018648010	7945900813660920	PTK2B|GFAP|MECP2|MPP2|NTRK2|PRKCG|RELN|SLC8A2|SLC8A3|SNAP25|TNR|NPTN|PRRT1|LRRTM1	-5638934056452080	1.0	0.0	0.0
1	0	0	1	0	-7399954060437100	0.0	0.0	-5836620062583250	0.0	R-HSA-1268020	Reactome Gene Sets	Mitochondrial protein import		-7399954060437100	1.0386e+16	9288738917036570	ACO2|BCS1L|FXN|HSPA9|OTC|PMPCB|PITRM1|PMPCA|SAMM50|DNAJC19	-5777307727295690	116.0	1.0	1.0
0	0	0	1	0	0.0	0.0	0.0	-7390721528745420	0.0	R-HSA-351202	Reactome Gene Sets	Metabolism of polyamines		-7390721528745420	1.57726e+16	1.05765e+16	PSMA7|PSMC4|PSMC5|PSMC6|PSMD2|PSMF1|PSMD6|PSME3	-5771328353001730	52.0	0.0	0.0
1	0	0	1	0	-2.74231e+16	0.0	0.0	-7390721528745420	0.0	R-HSA-5387390	Reactome Gene Sets	Hh mutants abrogate ligand secretion		-7390721528745420	1.57726e+16	1.05765e+16	PSMA7|PSMC4|PSMC5|PSMC6|PSMD2|PSMF1|PSMD6|PSME3	-5771328353001730	52.0	0.0	0.0
0	0	0	1	0	0.0	0.0	0.0	-7390721528745420	0.0	R-HSA-5676590	Reactome Gene Sets	NIK-->noncanonical NF-kB signaling		-7390721528745420	1.57726e+16	1.05765e+16	PSMA7|PSMC4|PSMC5|PSMC6|PSMD2|PSMF1|PSMD6|PSME3	-5771328353001730	52.0	0.0	0.0
0	0	1	0	1	0.0	0.0	-5490909771301000	0.0	-3.8599e+16	GO:0030516	GO Biological Processes	regulation of axon extension	19_GO:0040007 growth	-7389673366333840	4.99367e+16	7523148593631460	CDH4|MEGF8|GDI1|GSK3B|L1CAM|MAG|MAP1B|MAPT|NRCAM|PAFAH1B1|SLIT1|CDKL5|TNR|MAP3K13|SEMA6B|RUFY3|RTN4	-5618607200734610	38.0	0.0	0.0
1	0	0	1	0	-7385985215592960	0.0	0.0	-4752753170295260	0.0	GO:0022900	GO Biological Processes	electron transport chain	19_GO:0008152 metabolic process	-7385985215592960	5956670168067220	7946782788828310	COX15|DLD|GBA1|NDUFA10|NDUFS1|NDUFS2|NDUFS3|NDUFV1|NDUFS4|NDUFS8|SDHA|SURF1|UQCRC1|UQCRC2|NDUFS7	-5767401535856060	18.0	0.0	0.0
1	0	0	0	0	-7381166867373810	0.0	0.0	0.0	0.0	GO:0043574	GO Biological Processes	peroxisomal transport	19_GO:0051179 localization	-7381166867373810	1.96901e+16	1.12316e+16	ABCD1|PEX6|PEX7|PEX10|PEX2|USP9X|PEX3	-576481834663828	37.0	0.0	0.0
1	0	0	1	1	-4517856150328560	0.0	0.0	-4.94162e+16	-3.26509e+16	GO:0061025	GO Biological Processes	membrane fusion	19_GO:0009987 cellular process	-7.33905e+16	3776723276723270	7004286783470400	CLN3|FOLR1|SNAP25|STXBP1|VAMP1|RAB7A|STX7|USO1|NAPG|GOSR2|RIMS1|SYT11|ATP13A2|STX12|VPS41|CHMP4A|ANKFY1|CHMP5|ARL8B|VPS11|VPS16|SPG11|STX1B	-556913216238624	29.0	0.0	0.0
0	0	0	1	0	0.0	0.0	0.0	-733598027914347	0.0	WP3888	WikiPathways	VEGFA-VEGFR2 signaling		-733598027914347	4846794871794870	7498936389234810	AP2A1|CAPZB|TPP1|CLTC|EIF4G2|EPRS1|GRSF1|SRP54|PRDX2|TKT|STAM|SLC25A11|PRKRA|SYNJ1|ATP6V0D1|FARSB|CCT7|COPG1	-5726743788186590	117.0	1.0	1.0
1	0	0	0	1	-7333682735368480	0.0	0.0	0.0	-5327022439143570	hsa00510	KEGG Pathway	N-Glycan biosynthesis		-7333682735368480	1.21516e+16	9676863101067610	DPAGT1|STT3A|RPN2|MAN1B1|GANAB|ALG6|ALG1|ALG8|SRD5A3	-5726743788186590	42.0	0.0	0.0
0	0	0	1	0	0.0	0.0	0.0	-7331791988894620	0.0	R-HSA-187577	Reactome Gene Sets	SCF(Skp2)-mediated degradation of p27/p21		-7331791988894620	1550974358974350	1.04761e+16	PSMA7|PSMC4|PSMC5|PSMC6|PSMD2|PSMF1|PSMD6|PSME3	-5726743788186590	52.0	0.0	0.0
0	0	0	1	0	0.0	0.0	0.0	-7331791988894620	0.0	R-HSA-5607761	Reactome Gene Sets	Dectin-1 mediated noncanonical NF-kB signaling		-7331791988894620	1550974358974350	1.04761e+16	PSMA7|PSMC4|PSMC5|PSMC6|PSMD2|PSMF1|PSMD6|PSME3	-5726743788186590	52.0	0.0	0.0
0	0	0	1	0	0.0	0.0	0.0	-7331791988894620	0.0	R-HSA-5610780	Reactome Gene Sets	Degradation of GLI1 by the proteasome		-7331791988894620	1550974358974350	1.04761e+16	PSMA7|PSMC4|PSMC5|PSMC6|PSMD2|PSMF1|PSMD6|PSME3	-5726743788186590	52.0	0.0	0.0
0	0	0	1	0	0.0	0.0	0.0	-7331791988894620	0.0	R-HSA-5610783	Reactome Gene Sets	Degradation of GLI2 by the proteasome		-7331791988894620	1550974358974350	1.04761e+16	PSMA7|PSMC4|PSMC5|PSMC6|PSMD2|PSMF1|PSMD6|PSME3	-5726743788186590	52.0	0.0	0.0
0	0	0	1	0	0.0	0.0	0.0	-7331791988894620	0.0	R-HSA-5610785	Reactome Gene Sets	GLI3 is processed to GLI3R by the proteasome		-7331791988894620	1550974358974350	1.04761e+16	PSMA7|PSMC4|PSMC5|PSMC6|PSMD2|PSMF1|PSMD6|PSME3	-5726743788186590	52.0	0.0	0.0
1	0	0	0	0	-7323190349285420	0.0	0.0	0.0	0.0	CORUM:7291	CORUM	EIF2B2-EIF2B3-EIF2B4-EIF2B5 complex		-7323190349285420	6750892857142850	1631141032276750	EIF2B4|EIF2B3|EIF2B2|EIF2B5	-5718925366971640	77.0	0.0	0.0
1	0	0	0	0	-7.31237e+16	0.0	0.0	0.0	0.0	GO:0032204	GO Biological Processes	regulation of telomere maintenance	19_GO:0008152 metabolic process	-7.31237e+16	7789491758241750	8504617192708360	PARP1|ATM|ATR|DKC1|ERCC4|MRE11|PARN|XRCC1|RUVBL1|PNKP|NAT10|CTC1	-5.70889e+16	118.0	1.0	1.0
1	0	0	1	1	-4826320458466040	0.0	0.0	-4461435781922140	-3.05264e+16	GO:0034312	GO Biological Processes	diol biosynthetic process	19_GO:0008152 metabolic process	-7310030989069950	1.08152e+16	9131164551419530	ABCA2|ASAH1|GBA1|GCH1|PTS|QDPR|SPR|SPTLC1|SPTSSB	-554239799930912	94.0	0.0	0.0
0	0	1	0	1	0.0	0.0	-5128431186626390	0.0	-3562540217862310	GO:0060078	GO Biological Processes	regulation of postsynaptic membrane potential	19_GO:0065007 biological regulation	-7306094949224810	4665364047716980	7352078259861810	CHRNA4|CHRNB2|GABRA3|GLRA1|GLRB|GRIA2|GRIA3|GRID2|GRIK2|GRIK5|GRIN1|GSK3B|KCNA2|KCND2|MECP2|MPP2|MAPK8IP2|CELF4	-5539789922489960	119.0	1.0	1.0
1	1	0	1	1	-2999271623265600	-2.3198e+16	0.0	-3890195567098970	-3.8409e+16	GO:0005975	GO Biological Processes	carbohydrate metabolic process	19_GO:0008152 metabolic process	-7305085962999470	2517815517815510	6366302116222980	PARP1|ALDH2|DLAT|EXT2|B4GALNT1|GBE1|GLB1|GSK3B|HEXA|HEXB|KCNJ11|LIPA|MAN2A2|MAN2B1|MANBA|MDH2|NEU1|NPC1|OGDH|PC|PDHA1|PDHB|PHKB|PMM2|PPP1R1A|SLC2A1|SLC25A11|SLC23A2|PTGES3|MAN1B1|WDTC1|GANAB|SLC39A14|ST8SIA3|SPATA20|CHID1|GNPTG|G6PC3|BRAT1|FOXK1|HECTD4|NHLRC1	-5539789922489960	120.0	1.0	1.0
1	0	1	0	1	-2.35453e+16	0.0	-2.56214e+16	0.0	-5472088456132220	GO:0001764	GO Biological Processes	neuron migration	19_GO:0032502 developmental process	-7295982141133700	4052396508600880	7099805361919610	ASTN1|DAB1|DCX|CELSR2|FOXG1|GPM6A|MAP1B|NRCAM|NTRK2|PAFAH1B1|PEX7|RELN|PSEN1|CDKL5|NKX2-1|USP9X|RAPGEF2|TUBGCP2|ADGRL3|DNER|ARX	-5532884905205750	6.0	0.0	0.0
0	0	0	1	0	0.0	0.0	0.0	-7283741735984660	0.0	R-HSA-5632684	Reactome Gene Sets	Hedgehog 'on' state		-7283741735984660	1231656108597280	9729035551720580	PSMA7|PSMC4|PSMC5|PSMC6|PSMD2|CUL3|PSMF1|PSMD6|PSME3	-5684146631804360	52.0	0.0	0.0
1	0	0	1	0	-2.67785e+16	0.0	0.0	-7273956163096940	0.0	R-HSA-5678895	Reactome Gene Sets	Defective CFTR causes cystic fibrosis		-7273956163096940	1.52555e+16	1037815260325960	PSMA7|PSMC4|PSMC5|PSMC6|PSMD2|PSMF1|PSMD6|PSME3	-5675134513229540	52.0	0.0	0.0
1	0	0	1	0	-3.08263e+16	0.0	0.0	-7259894772566340	0.0	GO:0042559	GO Biological Processes	pteridine-containing compound biosynthetic process	19_GO:0008152 metabolic process	-7259894772566340	4.47396e+16	1468841712494940	ATIC|GCH1|PTS|QDPR|SPR	-5662049679909540	94.0	0.0	0.0
0	1	1	0	0	0.0	-3735837502294720	-4.70878e+16	0.0	0.0	GO:0030307	GO Biological Processes	positive regulation of cell growth	19_GO:0040007 growth	-7237718648724870	3730383113818690	6.93027e+16	ADAM10|CDH4|MEGF8|EIF4G2|PTK2B|FXN|MTOR|GDI1|L1CAM|MAP1B|MAPT|NCBP1|PAFAH1B1|RPS6KA3|CDKL5|MAP3K13|RIMS2|SLC23A2|RUFY3|RIMS1|UNC13A|SYT3|BRAT1	-5476871648307330	38.0	0.0	0.0
1	1	1	0	1	-2.31074e+16	-2.75575e+16	-2827775003428870	0.0	-2.34402e+16	GO:0021953	GO Biological Processes	central nervous system neuron differentiation	19_GO:0032502 developmental process	-7233320485797190	3.60505e+16	6.87226e+16	CHRNB2|CLN8|FOXG1|GRID2|ARHGAP35|HPRT1|MAPT|NTRK2|OGDH|OPHN1|PAFAH1B1|PSEN1|NKX2-1|RAPGEF2|FAIM2|KIFBP|IFT172|SLC4A10|TCTN1|SPG11|SHANK3|KNDC1|SLC25A46|ARX	-5473594245954940	121.0	1.0	1.0
1	0	0	1	0	-2.20564e+16	0.0	0.0	-7.21917e+16	0.0	R-HSA-3858494	Reactome Gene Sets	Beta-catenin independent WNT signaling		-7.21917e+16	8764067439409900	8756916974643480	AP2A1|CLTC|GNAO1|PSMA7|PSMC4|PSMC5|PSMC6|PSMD2|PSMF1|PSMD6|PSME3	-5624960439530300	52.0	0.0	0.0
1	0	0	0	0	-7206505240253110	0.0	0.0	0.0	0.0	GO:0071806	GO Biological Processes	protein transmembrane transport	19_GO:0051179 localization	-7206505240253110	992778361344538	9037321559098420	PEX6|PEX7|PEX10|PRF1|PEX2|SRP54|USP9X|AIFM1|SEC61A2|DNAJC19	-5613059541211730	37.0	0.0	0.0
0	0	1	0	1	0.0	0.0	-3.29518e+16	0.0	-2931362075064280	GO:0019226	GO Biological Processes	transmission of nerve impulse	19_GO:0032501 multicellular organismal process	-720458956718999	6484562607204110	7923556089683340	MTOR|GLRA1|GRIK2|KCNA2|KCND2|MAG|NRCAM|NTRK2|PAFAH1B1|SCN1A|CACNA1I|GPR88|CACNG8	-5451527823579100	99.0	0.0	0.0
0	1	1	0	0	0.0	-3241731248668900	-7082125769518100	0.0	0.0	GO:0035176	GO Biological Processes	social behavior	19_GO:0051703 biological process involved in intraspecies interaction between organisms	-720458956718999	6484562607204110	7923556089683340	CHRNB2|DLG4|CLN8|MECP2|SEPTIN5|ATXN1|TH|NRXN1|NRXN2|CIC|VPS13A|MAPK8IP2|SHANK3	-5451527823579100	63.0	0.0	0.0
0	1	1	0	0	0.0	-3241731248668900	-7082125769518100	0.0	0.0	GO:0051703	GO Biological Processes	biological process involved in intraspecies interaction between organisms	19_GO:0051703 biological process involved in intraspecies interaction between organisms	-720458956718999	6484562607204110	7923556089683340	CHRNB2|DLG4|CLN8|MECP2|SEPTIN5|ATXN1|TH|NRXN1|NRXN2|CIC|VPS13A|MAPK8IP2|SHANK3	-5451527823579100	63.0	0.0	0.0
0	0	1	0	0	0.0	0.0	-7199550397645670	0.0	0.0	GO:0007158	GO Biological Processes	neuron cell-cell adhesion	19_GO:0009987 cellular process	-7199550397645670	4500595238095230	1.47225e+16	ASTN1|TNR|NRXN1|NRXN2|CNTN4	-5607628540455060	63.0	0.0	0.0
1	0	0	0	1	-6963601651724500	0.0	0.0	0.0	-5500493293464180	GO:0006487	GO Biological Processes	protein N-linked glycosylation	19_GO:0008152 metabolic process	-7188196687892990	5507721445221440	7592769609846480	DPAGT1|EXT2|GFPT1|STT3A|PMM2|RPN2|ALG6|ALG1|UGGT1|ALG8|SRD5A3|DHDDS|NUS1|MGAT5B|STT3B	-5437938620137770	42.0	0.0	0.0
1	1	0	1	1	-2.36384e+16	-2.74205e+16	0.0	-2.4592e+16	-5500493293464180	R-HSA-199992	Reactome Gene Sets	trans-Golgi Network Vesicle Budding		-7188196687892990	5507721445221440	7592769609846480	AP1B1|APP|ARRB1|CLTC|CPD|DNASE2|FTL|IGF2R|SORT1|SH3GL2|TPD52L1|GBF1|PUM1|DNAJC6|TGOLN2	-5437938620137770	122.0	1.0	1.0
1	0	1	0	1	-3099299468055710	0.0	-4689623387888730	0.0	-2.49359e+16	GO:0042886	GO Biological Processes	amide transport	19_GO:0051179 localization	-7187706078811110	3.70764e+16	6893700012645680	ABCA2|ABCD1|APBA1|CPE|CLN8|FOLR1|KCNJ10|MTTP|NF1|NTRK2|PSAP|PSEN1|PTPRN|PTPRN2|RAB1A|SLC16A2|SLC33A1|RIMS2|ARL6IP5|CPLX1|PRAF2|SMPD3|SNX19	-5437938620137770	83.0	0.0	0.0
1	0	0	1	0	-342280990695485	0.0	0.0	-7175243376595030	0.0	WP4290	WikiPathways	Metabolic reprogramming in colon cancer		-7175243376595030	1.93872e+16	1.11039e+16	ACLY|ACO2|GOT2|MDH2|PDHA1|PDHB|TKT	-558710789458179	123.0	1.0	1.0
0	0	1	0	0	0.0	0.0	-5.07269e+16	0.0	0.0	GO:0050773	GO Biological Processes	regulation of dendrite development	19_GO:0032502 developmental process	-7171116710205470	4575645508337810	7.24233e+16	CHRNB2|DLG4|GSK3B|PAFAH1B1|RELN|PTPRD|CDKL5|VLDLR|RAPGEF2|HECW1|CUX2|CRTC1|CAMK1D|TBC1D24|RTN4IP1|KNDC1|CSMD3|DAB2IP	-5422441816842700	124.0	1.0	1.0
1	1	0	1	0	-5214676899432950	-5875722554249460	0.0	-6042884676951440	0.0	R-HSA-196854	Reactome Gene Sets	Metabolism of vitamins and cofactors		-7150501262963440	3460348551971580	6.76314e+16	BTD|CALM1|CYB5R3|GCH1|LRP1|MTHFD1|MMUT|PC|PCCA|PCCB|PTS|SLC2A1|SPR|TTPA|PDXK|NFS1|SLC23A2|NMNAT2|MMACHC|RDH11|LMBRD1|MCCC1|SLC52A2|PANK2|SLC19A3	-5402916193213730	125.0	1.0	1.0
0	0	1	0	1	0.0	0.0	-2508144331557810	0.0	-7141284266666810	WP4148	WikiPathways	Splicing factor NOVA regulated synaptic proteins		-7141284266666810	1.9166e+16	1.1034e+16	APLP2|ATP2B1|CDH2|GRIN1|KCNQ2|CLSTN1|NCDN	-5555404864957790	126.0	1.0	1.0
1	0	0	1	1	-4292216605619210	0.0	0.0	-2.16565e+16	-3201199034272270	GO:0097352	GO Biological Processes	autophagosome maturation	19_GO:0008152 metabolic process	-7.1345e+16	704988344988345	8052596470914410	ATP2A2|CALM1|CLN3|LAMP2|VCP|CHMP4A|UBQLN1|PIK3R4|CHMP5|SNX14|VPS16|MFSD8	-5388376919768870	21.0	0.0	0.0
1	0	0	0	1	-5958940367911630	0.0	0.0	0.0	-7133686743475100	GO:0006486	GO Biological Processes	protein glycosylation	19_GO:0008152 metabolic process	-7133686743475100	6826258312064860	8104711063704910	EXT2|STT3A|MAN2A2|NPC1|PSEN1|RPN2|PLOD3|TMEM59|MAN1B1|UGGT1|DHDDS|NUS1|STT3B	-5549304910428970	65.0	0.0	0.0
1	0	0	0	1	-5958940367911630	0.0	0.0	0.0	-7133686743475100	GO:0043413	GO Biological Processes	macromolecule glycosylation	19_GO:0008152 metabolic process	-7133686743475100	6826258312064860	8104711063704910	EXT2|STT3A|MAN2A2|NPC1|PSEN1|RPN2|PLOD3|TMEM59|MAN1B1|UGGT1|DHDDS|NUS1|STT3B	-5549304910428970	65.0	0.0	0.0
0	0	1	0	0	0.0	0.0	-6552612650165870	0.0	0.0	GO:0099601	GO Biological Processes	regulation of neurotransmitter receptor activity	19_GO:0050896 response to stimulus	-7.12472e+16	5874902874902870	7679772977119950	APP|CAPN1|DLG4|PTK2B|RELN|NRXN2|DLGAP4|MAPK8IP2|MINK1|DLGAP3|CACNG8|LYNX1|PRRT1|SHANK3	-5380387071877420	43.0	0.0	0.0
0	0	1	0	1	0.0	0.0	-4743892519851160	0.0	-2.99473e+16	GO:0048169	GO Biological Processes	regulation of long-term neuronal synaptic plasticity	19_GO:0050789 regulation of biological process	-7109291484662530	1.03449e+16	8889244753987010	APP|DLG4|GRIK2|KCNJ10|NF1|SYNGAP1|NEURL1|NPTN|SHANK3	-5367114884336680	80.0	0.0	0.0
1	0	0	1	0	-3.43097e+16	0.0	0.0	-7106641477242090	0.0	R-HSA-174084	Reactome Gene Sets	Autodegradation of Cdh1 by Cdh1:APC/C		-7106641477242090	1.45404e+16	1009754259999700	PSMA7|PSMC4|PSMC5|PSMC6|PSMD2|PSMF1|PSMD6|PSME3	-5524496358918030	52.0	0.0	0.0
0	0	0	1	0	0.0	0.0	0.0	-7106641477242090	0.0	R-HSA-4608870	Reactome Gene Sets	Asymmetric localization of PCP proteins		-7106641477242090	1.45404e+16	1009754259999700	PSMA7|PSMC4|PSMC5|PSMC6|PSMD2|PSMF1|PSMD6|PSME3	-5524496358918030	52.0	0.0	0.0
0	0	1	0	1	0.0	0.0	-504526507049671	0.0	-3.49451e+16	GO:0061387	GO Biological Processes	regulation of extent of cell growth	19_GO:0040007 growth	-7104931602375210	4532067932067930	7188499229076980	CDH4|MEGF8|GDI1|GSK3B|L1CAM|MAG|MAP1B|MAPT|NRCAM|PAFAH1B1|SLIT1|CDKL5|TNR|MAP3K13|SEMA6B|RUFY3|SPART|RTN4	-5363828660153420	38.0	0.0	0.0
0	0	1	0	1	0.0	0.0	-6564712296179860	0.0	-2467724235767560	GO:0071805	GO Biological Processes	potassium ion transmembrane transport	19_GO:0051179 localization	-7088959550599360	3.66297e+16	6821411208287010	ATP1A3|HCN2|KCNA2|KCNC3|KCND1|KCND2|KCND3|KCNJ10|KCNJ11|KCNQ2|KCNQ3|SNAP25|ABCC8|SLC12A6|SLC9A6|ABCB8|SLC9A8|GHITM|KCNK12|SLC12A9|SLC12A5|KCNT1|NALCN	-53489276187401	127.0	1.0	1.0
1	0	0	1	0	-4373961129015260	0.0	0.0	-7071067656213110	0.0	GO:0006085	GO Biological Processes	acetyl-CoA biosynthetic process	19_GO:0008152 metabolic process	-7071067656213110	4.1544e+16	1412945435311310	ACAT1|ACLY|DLAT|PDHA1|PDHB	-5496296135757850	35.0	0.0	0.0
0	0	0	1	1	0.0	0.0	0.0	-7071067656213110	-5281990195718440	GO:0048388	GO Biological Processes	endosomal lumen acidification	19_GO:0042592 homeostatic process	-7071067656213110	4.1544e+16	1412945435311310	ATP6V1A|ATP6AP1|ATP6AP2|ATP6V1D|ATP6V1H	-5496296135757850	93.0	0.0	0.0
1	1	0	1	0	-4135387085423260	-5650584364999960	0.0	-6.7206e+16	0.0	hsa00630	KEGG Pathway	Glyoxylate and dicarboxylate metabolism		-7061384482605430	8812354312354310	8488235083411920	ACAT1|ACO2|AMT|DLD|GLDC|MDH2|MMUT|PCCA|PCCB|GRHPR	-5323486680258850	128.0	1.0	1.0
1	0	0	1	0	-262221967960997	0.0	0.0	-7052894595527870	0.0	R-HSA-983168	Reactome Gene Sets	Antigen processing: Ubiquitination & Proteasome degradation		-7052894595527870	5.64675e+16	7645279414598450	PSMA7|PSMC4|PSMC5|PSMC6|PSMD2|UBA1|UBE2A|CUL3|CUL2|PSMF1|NPEPPS|PSMD6|PSME3|ANAPC13|UBE2F	-5482413487320120	52.0	0.0	0.0
1	0	0	1	0	-2556232180344850	0.0	0.0	-7052820202372930	0.0	R-HSA-5358346	Reactome Gene Sets	Hedgehog ligand biogenesis		-7052820202372930	1.43167e+16	1.00082e+16	PSMA7|PSMC4|PSMC5|PSMC6|PSMD2|PSMF1|PSMD6|PSME3	-5482413487320120	52.0	0.0	0.0
0	1	0	0	0	0.0	-7051997860171340	0.0	0.0	0.0	R-HSA-3371599	Reactome Gene Sets	Defective HLCS causes multiple carboxylase deficiency		-7051997860171340	7964186965108620	1768967400989360	PC|PCCA|PCCB|MCCC1	-5482314366737620	128.0	0.0	0.0
1	0	0	1	0	-6710592602666210	0.0	0.0	-4463646054719110	0.0	R-HSA-1640170	Reactome Gene Sets	Cell Cycle		-7048170997369380	2142511612844460	6023900812797010	ATM|ATR|CSNK2B|DKC1|DYNC1H1|GSK3B|LMNB1|MLH1|MRE11|PAFAH1B1|POLR2A|PPP2R2A|PSMA7|PSMC4|PSMC5|PSMC6|PSMD1|PSMD2|PSMD3|RAB1A|RAB2A|RANGAP1|RFC1|SEC13|TUBB2A|VRK1|YWHAG|NUP214|AAAS|OFD1|RUVBL1|USO1|CDC23|ZW10|PSMF1|NUP155|CKAP5|PSMD6|POM121|PSME3|TUBB4A|TUBGCP2|YWHAQ|SYNE1|ORC3|CHMP4A|BABAM1|DYNC1LI1|PHF20|PPP6R3|NUP133|ANAPC1|CTC1|CEP290|TUBGCP5|RNF168	-5311336339940270	129.0	1.0	1.0
0	0	0	1	1	0.0	0.0	0.0	-7.02363e+16	-2.91678e+16	GO:0007032	GO Biological Processes	endosome organization	19_GO:0009987 cellular process	-7.02363e+16	1.15045e+16	9345107907930400	ATP6V1A|ATP6AP1|STAM|SQSTM1|ATP6AP2|ATP6V1D|CHMP5|ATP6V1H|AKTIP	-5457548661275720	93.0	0.0	0.0
1	0	0	1	0	-4.19895e+16	0.0	0.0	-7.02363e+16	0.0	GO:0043648	GO Biological Processes	dicarboxylic acid metabolic process	19_GO:0008152 metabolic process	-7.02363e+16	1.15045e+16	9345107907930400	ACLY|ATIC|GOT2|MDH2|ME2|OGDH|PHYH|SDHA|SUCLA2	-5457548661275720	35.0	0.0	0.0
0	1	1	1	1	0.0	-2.6926e+16	-3.39419e+16	-3243528706001660	-2654763319098820	GO:0007018	GO Biological Processes	microtubule-based movement	19_GO:0009987 cellular process	-7012340774690190	2.59589e+16	6.26489e+16	APBA1|APP|KIF1A|CLN3|DYNC1H1|CELSR2|HTT|KIF3C|KIF5A|MAP1A|MAP1B|MAPT|OPA1|PAFAH1B1|RAB1A|RAB6A|SPG7|UCHL1|OFD1|AP3D1|NEURL1|ACTR3|LRPPRC|KIF1C|CELF3|COPG1|KIFAP3|KIF1B|MAPK8IP3|VPS13A|IFT172|DYNC1LI1|ARL8B|SYBU|ACTR10|ASH1L|CAMSAP3|SPG11	-5282148260851180	55.0	0.0	0.0
1	0	0	1	0	-4245154231682540	0.0	0.0	-6814153891347970	0.0	R-HSA-68882	Reactome Gene Sets	Mitotic Anaphase		-7001042586263710	3136600687448140	6533408183502540	DYNC1H1|LMNB1|PAFAH1B1|PPP2R2A|PSMA7|PSMC4|PSMC5|PSMC6|PSMD1|PSMD2|PSMD3|RANGAP1|SEC13|TUBB2A|VRK1|CDC23|ZW10|PSMF1|NUP155|CKAP5|PSMD6|POM121|PSME3|TUBB4A|CHMP4A|DYNC1LI1|NUP133|ANAPC1	-5.27262e+16	129.0	0.0	0.0
1	0	0	1	0	-2.52724e+16	0.0	0.0	-6999921257047420	0.0	R-HSA-69563	Reactome Gene Sets	p53-Dependent G1 DNA Damage Response		-6999921257047420	140997668997669	992075289870874	PSMA7|PSMC4|PSMC5|PSMC6|PSMD2|PSMF1|PSMD6|PSME3	-543740450185352	52.0	0.0	0.0
1	0	0	1	0	-2.52724e+16	0.0	0.0	-6999921257047420	0.0	R-HSA-69580	Reactome Gene Sets	p53-Dependent G1/S DNA damage checkpoint		-6999921257047420	140997668997669	992075289870874	PSMA7|PSMC4|PSMC5|PSMC6|PSMD2|PSMF1|PSMD6|PSME3	-543740450185352	52.0	0.0	0.0
0	0	1	0	1	0.0	0.0	-2.45048e+16	0.0	-6995304757687090	GO:1904646	GO Biological Processes	cellular response to amyloid-beta	19_GO:0050896 response to stimulus	-6995304757687090	1.82948e+16	1.07524e+16	APP|ATP1A3|CACNA1A|LRP1|PRNP|PSEN1|BACE1	-5434207266769050	101.0	0.0	0.0
1	0	0	1	0	-3153899023375440	0.0	0.0	-59543051316856	0.0	GO:0061136	GO Biological Processes	regulation of proteasomal protein catabolic process	19_GO:0008152 metabolic process	-69727400104348	3389367043213190	6636882293796620	FHIT|GBA1|GSK3B|MAP1A|ATXN3|OPHN1|PRKCG|PSEN1|PSMC4|PSMC5|PSMC6|TAF1|VCP|WFS1|USP5|USP9X|PSMF1|BCAP31|PSME3|STUB1|ZER1|UFL1|UBQLN2|UBQLN1|DAB2IP	-5246396067964630	46.0	0.0	0.0
1	0	0	0	0	-6969646266987630	0.0	0.0	0.0	0.0	GO:0120031	GO Biological Processes	plasma membrane bounded cell projection assembly	19_GO:0009987 cellular process	-6969646266987630	3679396580907240	6796687469515310	KCNJ10|OPHN1|OFD1|GBF1|ATP6V0D1|KIAA0586|PIBF1|RPGRIP1L|ATXN10|TCTN3|IFT172|TMEM216|AHI1|MKS1|CC2D2A|CPLANE1|TMEM231|TCTN1|TCTN2|CEP290|TMEM67|TTBK2|ARL13B	-5409963417326590	22.0	0.0	0.0
0	1	1	0	1	0.0	-3499838383185360	-6964698972395420	0.0	-2240253785814030	GO:0046928	GO Biological Processes	regulation of neurotransmitter secretion	19_GO:0051179 localization	-6964698972395420	1.40506e+16	9895189643193170	SEPTIN5|STXBP1|RIMS2|RIMS3|CPLX2|CPLX1|STX1B|RIMS4	-5405721719123390	25.0	0.0	0.0
1	1	0	1	1	-2897841569572690	-2023028838406160	0.0	-3876393892405020	-2.09516e+16	GO:1904951	GO Biological Processes	positive regulation of establishment of protein localization	19_GO:0051179 localization	-6962610542641910	2.75724e+16	6324882738083060	CLN3|DKC1|GSK3B|HPCA|ITPR1|PIK3R1|PIK3R2|PRNP|PSEN1|ABCC8|BAP1|PLA2G6|ADAM9|NPEPPS|ABCG1|ATG13|HUWE1|BCAP31|CCT7|RUFY3|CCT5|PLCB1|MTCL1|ATP13A2|PTPN23|ATP2C1|SAR1B|VPS35|TMEM30A|EXOC1|VPS11|DMAP1|XPO4|CEP290	-5237846417525150	68.0	0.0	0.0
1	0	0	1	0	-4226424819440780	0.0	0.0	-6792951280196180	0.0	R-HSA-2555396	Reactome Gene Sets	Mitotic Metaphase and Anaphase		-6962122287125940	3123366085391400	6506788835361090	DYNC1H1|LMNB1|PAFAH1B1|PPP2R2A|PSMA7|PSMC4|PSMC5|PSMC6|PSMD1|PSMD2|PSMD3|RANGAP1|SEC13|TUBB2A|VRK1|CDC23|ZW10|PSMF1|NUP155|CKAP5|PSMD6|POM121|PSME3|TUBB4A|CHMP4A|DYNC1LI1|NUP133|ANAPC1	-5237846417525150	129.0	0.0	0.0
1	0	0	1	0	-3.84878e+16	0.0	0.0	-6950018871875810	0.0	R-HSA-2467813	Reactome Gene Sets	Separation of Sister Chromatids		-6950018871875810	7308256141763990	8143974614423090	PAFAH1B1|PSMA7|PSMC4|PSMC5|PSMC6|PSMD2|RANGAP1|PSMF1|PSMD6|PSME3|TUBB4A|DYNC1LI1	-539244938152817	52.0	0.0	0.0
1	0	0	1	0	-3.32295e+16	0.0	0.0	-6947915232699550	0.0	GO:0006879	GO Biological Processes	intracellular iron ion homeostasis	19_GO:0042592 homeostatic process	-6947915232699550	1.38893e+16	9835213415704900	ATP6V1A|ATP6AP1|CP|FTL|ATP6V0D1|ATP13A2|SLC39A14|NDFIP1	-5391748956761350	130.0	1.0	1.0
0	0	0	1	0	0.0	0.0	0.0	-6947915232699550	0.0	R-HSA-1169091	Reactome Gene Sets	Activation of NF-kappaB in B cells		-6947915232699550	1.38893e+16	9835213415704900	PSMA7|PSMC4|PSMC5|PSMC6|PSMD2|PSMF1|PSMD6|PSME3	-5391748956761350	52.0	0.0	0.0
1	0	0	1	0	-6.90535e+16	0.0	0.0	-5492718345023590	0.0	GO:0015986	GO Biological Processes	proton motive force-driven ATP synthesis	19_GO:0008152 metabolic process	-6.90535e+16	924779843444227	8651214405086770	ATP6|NDUFA10|NDUFS1|NDUFS2|NDUFS3|NDUFV1|NDUFS4|NDUFS8|SDHA|NDUFS7	-5350577780707700	18.0	0.0	0.0
0	1	0	1	0	0.0	-3.80819e+16	0.0	-6898034264850190	0.0	GO:0046459	GO Biological Processes	short-chain fatty acid metabolic process	19_GO:0008152 metabolic process	-6898034264850190	3.87744e+16	1.36265e+16	CRAT|MMUT|PCCA|PCCB|PHYH	-5344790474575130	128.0	0.0	0.0
1	0	0	1	0	-3.28822e+16	0.0	0.0	-6896774106801160	0.0	R-HSA-174154	Reactome Gene Sets	APC/C:Cdc20 mediated degradation of Securin		-6896774106801160	1.36851e+16	9751484622890150	PSMA7|PSMC4|PSMC5|PSMC6|PSMD2|PSMF1|PSMD6|PSME3	-5344790474575130	52.0	0.0	0.0
1	0	0	1	0	-2.47082e+16	0.0	0.0	-6896774106801160	0.0	R-HSA-69615	Reactome Gene Sets	G1/S DNA Damage Checkpoints		-6896774106801160	1.36851e+16	9751484622890150	PSMA7|PSMC4|PSMC5|PSMC6|PSMD2|PSMF1|PSMD6|PSME3	-5344790474575130	52.0	0.0	0.0
1	0	0	0	1	-5292722421233050	0.0	0.0	0.0	-6427244731724500	hsa00511	KEGG Pathway	Other glycan degradation		-6.89414e+16	1174980574980570	9045352218359820	AGA|GBA1|GLB1|HEXA|HEXB|MAN2B1|MANBA|NEU1	-5177025293170290	49.0	0.0	0.0
1	0	0	0	0	-6887238162574820	0.0	0.0	0.0	0.0	GO:0065002	GO Biological Processes	intracellular protein transmembrane transport	19_GO:0051179 localization	-6887238162574820	1084964923469380	9046280845470720	PEX6|PEX7|PEX10|PEX2|SRP54|USP9X|AIFM1|SEC61A2|DNAJC19	-533663984087556	37.0	0.0	0.0
0	1	1	0	0	0.0	-2511609036565930	-6831223593932340	0.0	0.0	GO:0032271	GO Biological Processes	regulation of protein polymerization	19_GO:0050789 regulation of biological process	-6885822878642580	3354957225515600	6574981425073850	ADD1|ADD2|CAPZB|DMTN|PTK2B|FLII|MTOR|MAP1B|MAPT|MECP2|PIK3R2|SPTB|SPTBN1|SPTBN2|TBCD|VDAC2|CKAP5|TUBB4A|ARFGEF1|TPPP|CYFIP2|GIT1|TMOD2|CAMSAP3|CARMIL2	-5169722205390840	36.0	0.0	0.0
0	0	1	0	1	0.0	0.0	-3021768654871070	0.0	-6882555206073020	WP5200	WikiPathways	Dravet syndrome		-6882555206073020	2.4642e+16	1.17223e+16	CHD2|SCN1A|SCN2A|SCN8A|STXBP1|SCN3B	-5.33265e+16	47.0	0.0	0.0
0	1	1	0	1	0.0	-2.10041e+16	-3.53713e+16	0.0	-2.89834e+16	GO:0050769	GO Biological Processes	positive regulation of neurogenesis	19_GO:0032502 developmental process	-6846814725844550	3084324009324000	6427768487098030	CDH4|DLG4|MEGF8|FOXG1|MTOR|GDI1|GFAP|L1CAM|MAG|MAP1B|MAPT|MECP2|NRDC|NTRK2|PAFAH1B1|RELN|PTPRD|CDKL5|SYNJ1|NEURL1|MAP3K13|RUFY3|CUX2|UFL1|NPTN|GJC2|TBC1D24|SHANK3	-5.13173e+16	38.0	0.0	0.0
1	0	0	1	0	-2.44337e+16	0.0	0.0	-6.84647e+16	0.0	R-HSA-8948751	Reactome Gene Sets	Regulation of PTEN stability and activity		-6.84647e+16	1.34867e+16	9669501272151660	PSMA7|PSMC4|PSMC5|PSMC6|PSMD2|PSMF1|PSMD6|PSME3	-5299316901322220	52.0	0.0	0.0
1	0	0	0	1	-282070907350489	0.0	0.0	0.0	-3.12496e+16	GO:1901652	GO Biological Processes	response to peptide	19_GO:0050896 response to stimulus	-6823856094855140	2419077654371770	6074249889638840	PARP1|APP|ATP1A3|CACNA1A|EIF2B1|EPRS1|MTOR|GSK3B|LRP1|LTA4H|MAP1B|OTC|PDPK1|PIK3R1|PIK3R2|PRKDC|PRNP|LGMN|PSEN1|QDPR|RANGAP1|RAP1GDS1|SORT1|SLC2A1|ABCC8|TH|YWHAG|EIF2B4|EIF2B3|EIF2B2|EIF2B5|SLC27A4|SCAP|WDTC1|PLCB1|SLC39A14|BACE1|CHMP5|VPS13C|SMPD3|SLC30A10|ARID1B	-5110649028061740	100.0	0.0	0.0
1	1	0	0	1	-4807835719945590	-3144029750123450	0.0	0.0	-2.77366e+16	R-HSA-5619102	Reactome Gene Sets	SLC transporter disorders		-6823723246683280	4586021121735400	7050014109158410	CP|SLC11A2|SEC13|SLC2A1|SLC6A3|NUP214|AAAS|SLC6A5|SLC33A1|NUP155|POM121|SLC12A6|SLC9A6|SLC27A4|SLC17A5|NUP133|SLC6A19	-5110649028061740	34.0	0.0	0.0
1	0	0	1	0	-3.08263e+16	0.0	0.0	-544487263259776	0.0	CORUM:728	CORUM	CSA-POLIIa complex		-681572537460156	1.42353e+16	946366865346987	DDB1|GPS1|POLR2A|COPS8|COPS5|COPS7A|COPS4	-5103655305518460	66.0	0.0	0.0
1	0	0	0	1	-2.2575e+16	0.0	0.0	0.0	-6724558452810350	GO:0006623	GO Biological Processes	protein targeting to vacuole	19_GO:0051179 localization	-6795760228971580	6609265734265730	771135821153028	SCARB2|LAMP2|SORT1|RAB7A|SQSTM1|AP3D1|VPS13A|VPS41|PIK3R4|VPS13C|VPS13D|GNPTG	-5.08669e+16	76.0	0.0	0.0
1	0	0	1	0	-6787503582772220	0.0	0.0	-3331827885098500	0.0	GO:0006450	GO Biological Processes	regulation of translational fidelity	19_GO:0065007 biological regulation	-6787503582772220	2250297619047610	1.11897e+16	AARS1|LARS1|IARS2|VARS2|AARS2|TARS2	-5245125591319650	8.0	0.0	0.0
1	1	0	1	0	-3000969214201420	-2.63507e+16	0.0	-3268338049581200	0.0	GO:0006900	GO Biological Processes	vesicle budding from membrane	19_GO:0051179 localization	-6780224210020340	5150077195531740	7229602650614640	DNM1|RAB1A|SEC13|CUL3|GBF1|AP3D1|SEC24C|SNAP91|SEC23B|SCAP|CHMP4A|CHMP5|TRAPPC11|TRAPPC9|MIA3	-5.07314e+16	131.0	1.0	1.0
1	1	0	0	0	-3.76683e+16	-6753420457926930	0.0	0.0	0.0	R-HSA-3323169	Reactome Gene Sets	Defects in biotin (Btn) metabolism		-6753420457926930	6968663594470040	1651738916747410	PC|PCCA|PCCB|MCCC1	-5213186625669690	128.0	0.0	0.0
1	0	0	0	0	-675285872374634	0.0	0.0	0.0	0.0	GO:0030031	GO Biological Processes	cell projection assembly	19_GO:0009987 cellular process	-675285872374634	357766211323239	6632271922642660	KCNJ10|OPHN1|OFD1|GBF1|ATP6V0D1|KIAA0586|PIBF1|RPGRIP1L|ATXN10|TCTN3|IFT172|TMEM216|AHI1|MKS1|CC2D2A|CPLANE1|TMEM231|TCTN1|TCTN2|CEP290|TMEM67|TTBK2|ARL13B	-5213186625669690	22.0	0.0	0.0
1	1	0	0	0	-6750737470267550	-3092831781138500	0.0	0.0	0.0	GO:0006767	GO Biological Processes	water-soluble vitamin metabolic process	19_GO:0008152 metabolic process	-6750737470267550	1047552339901470	8857004804488820	BTD|FOLR1|SLC2A1|PDXK|MMACHC|MCCC1|SLC52A2|PANK2|SLC19A3	-5.21174e+16	125.0	0.0	0.0
1	0	0	1	0	-2389892823657320	0.0	0.0	-6748278924083120	0.0	R-HSA-68949	Reactome Gene Sets	Orc1 removal from chromatin		-6748278924083120	1.31068e+16	9510526004086620	PSMA7|PSMC4|PSMC5|PSMC6|PSMD2|PSMF1|PSMD6|PSME3	-5210625239315360	52.0	0.0	0.0
1	0	0	1	0	-4989526954113590	0.0	0.0	-6748278924083120	0.0	WP2359	WikiPathways	Parkin-ubiquitin proteasomal system pathway		-6748278924083120	1.31068e+16	9510526004086620	HSPA9|PSMC4|PSMC5|PSMC6|PSMD2|UBA1|PSMD6|TUBB4A	-5210625239315360	52.0	0.0	0.0
1	0	1	0	0	-2.01131e+16	0.0	-673894638118443	0.0	0.0	GO:0051494	GO Biological Processes	negative regulation of cytoskeleton organization	19_GO:0048519 negative regulation of biological process	-673894638118443	905780173704702	851835284724116	ADD2|CTNNA2|DMTN|MAP1B|PIK3R1|SPTB|SPTBN1|APC2|TMOD2|SHANK3	-5202051023232780	36.0	0.0	0.0
0	0	0	1	0	0.0	0.0	0.0	-6738364291868870	0.0	WP2453	WikiPathways	TCA cycle and deficiency of pyruvate dehydrogenase complex (PDHc)		-6738364291868870	3635096153846150	1.31708e+16	ACLY|DLAT|OGDH|PDHA1|SDHA	-5202051023232780	35.0	0.0	0.0
0	0	0	1	1	0.0	0.0	0.0	-6.7206e+16	-3892148325531460	R-HSA-77387	Reactome Gene Sets	Insulin receptor recycling		-6.7206e+16	2.32646e+16	1.13612e+16	ATP6V1A|ATP6AP1|CTSD|ATP6V0D1|ATP6V1D|ATP6V1H	-5187621895053340	93.0	0.0	0.0
1	0	0	1	1	-4859250683690690	0.0	0.0	-2.03457e+16	-2.71576e+16	hsa04723	KEGG Pathway	Retrograde endocannabinoid signaling		-6708022842802940	3751204876204870	665239998054346	ADCY5|CACNA1A|GABRA3|GNAO1|GRIA2|GRIA3|ITPR1|ND6|NDUFA10|NDUFS1|NDUFS2|NDUFS3|NDUFV1|NDUFS4|NDUFS8|PRKCG|MGLL|RIMS1|PLCB1|ABHD6|NDUFS7	-5001929397608600	18.0	0.0	0.0
1	0	0	1	1	-6627496188666590	0.0	0.0	-2334648191002480	-2317116907671250	R-HSA-446193	Reactome Gene Sets	Biosynthesis of the N-glycan precursor (dolichol lipid-linked oligosaccharide, LLO) and transfer to a nascent protein		-6702822049868460	5084050564819790	7160749822894420	DPAGT1|GFPT1|GLB1|NEU1|PMM2|CTSA|SLC17A5|ALG6|ST8SIA3|CMAS|ALG1|ALG8|SRD5A3|DHDDS|NUS1	-4.99772e+16	132.0	1.0	1.0
1	0	0	1	0	-6700049942272310	0.0	0.0	-4.12514e+16	0.0	GO:0046034	GO Biological Processes	ATP metabolic process	19_GO:0008152 metabolic process	-6700049942272310	6865314769975780	78276978009886	PARP1|ATP6|NDUFA10|NDUFS1|NDUFS2|NDUFS3|NDUFV1|NDUFS4|NDUFS8|SDHA|VCP|NDUFS7	-5168395816211520	18.0	0.0	0.0
1	0	0	0	1	-5347982847805330	0.0	0.0	0.0	-6691307778601230	GO:0030149	GO Biological Processes	sphingolipid catabolic process	19_GO:0008152 metabolic process	-6691307778601230	2.29992e+16	1.1291e+16	ASAH1|GBA1|HEXA|NEU1|PPT1|SMPD1	-5160975706778720	81.0	0.0	0.0
1	0	0	0	0	-667495584256422	0.0	0.0	0.0	0.0	GO:0000723	GO Biological Processes	telomere maintenance	19_GO:0008152 metabolic process	-667495584256422	7655651693667150	8050574286194520	PARP1|ATM|ATR|DKC1|ERCC4|MRE11|PRKDC|RFC1|XRCC1|RUVBL1|CTC1	-5146599336613400	85.0	0.0	0.0
1	0	0	1	0	-6658516182578150	0.0	0.0	-3980477700189300	0.0	GO:0009141	GO Biological Processes	nucleoside triphosphate metabolic process	19_GO:0008152 metabolic process	-6658516182578150	5.65943e+16	7403657747868240	PARP1|ATP6|NDUFA10|NDUFS1|NDUFS2|NDUFS3|NDUFV1|NDUFS4|NDUFS8|OPA1|SDHA|VCP|RRM2B|NDUFS7	-5132779862444800	18.0	0.0	0.0
1	0	0	1	0	-6658516182578150	0.0	0.0	-3200144666849970	0.0	GO:0030258	GO Biological Processes	lipid modification	19_GO:0008152 metabolic process	-6658516182578150	5.65943e+16	7403657747868240	ACAA1|ACAT1|ABCD1|AUH|ECHS1|B4GALNT1|GBA1|HSD17B4|PEX7|PHYH|PEX2|FIG4|ILVBL|FA2H	-5132779862444800	39.0	0.0	0.0
1	0	0	1	0	-3.12334e+16	0.0	0.0	-6653147886963290	0.0	R-HSA-174184	Reactome Gene Sets	Cdc20:Phospho-APC/C mediated degradation of Cyclin A		-6653147886963290	127477344573235	9357827236822990	PSMA7|PSMC4|PSMC5|PSMC6|PSMD2|PSMF1|PSMD6|PSME3	-512984175601311	52.0	0.0	0.0
1	0	0	1	0	-3.12334e+16	0.0	0.0	-6653147886963290	0.0	R-HSA-69017	Reactome Gene Sets	CDK-mediated phosphorylation and removal of Cdc6		-6653147886963290	127477344573235	9357827236822990	PSMA7|PSMC4|PSMC5|PSMC6|PSMD2|PSMF1|PSMD6|PSME3	-512984175601311	52.0	0.0	0.0
1	0	0	1	0	-2.33824e+16	0.0	0.0	-6653147886963290	0.0	R-HSA-8939902	Reactome Gene Sets	Regulation of RUNX2 expression and activity		-6653147886963290	127477344573235	9357827236822990	PSMA7|PSMC4|PSMC5|PSMC6|PSMD2|PSMF1|PSMD6|PSME3	-512984175601311	52.0	0.0	0.0
0	0	0	0	1	0.0	0.0	0.0	0.0	-6652973603681740	GO:1904375	GO Biological Processes	regulation of protein localization to cell periphery	19_GO:0051179 localization	-6652973603681740	8845861362971620	8396442819253320	ADAM10|CLN3|CLTC|LRP1|PDPK1|PRNP|TMEM59|RER1|ATP2C1|NHLRC1	-512984175601311	108.0	0.0	0.0
0	0	1	0	0	0.0	0.0	-6638341590840490	0.0	0.0	GO:1902904	GO Biological Processes	negative regulation of supramolecular fiber organization	19_GO:0048519 negative regulation of biological process	-6638341590840490	8835524393806600	8387474798346080	ADD2|CTNNA2|DMTN|MAP1B|PIK3R1|SPTB|SPTBN1|APC2|TMOD2|SHANK3	-5116506145573020	36.0	0.0	0.0
1	0	0	1	0	-6633198097236860	0.0	0.0	-4455483156907590	0.0	GO:0009205	GO Biological Processes	purine ribonucleoside triphosphate metabolic process	19_GO:0008152 metabolic process	-6633198097236860	6137175324675320	7550477254985720	PARP1|ATP6|NDUFA10|NDUFS1|NDUFS2|NDUFS3|NDUFV1|NDUFS4|NDUFS8|OPA1|SDHA|VCP|NDUFS7	-5112844593416560	18.0	0.0	0.0
1	0	0	0	1	-6633198097236860	0.0	0.0	0.0	-3.57559e+16	R-HSA-3781865	Reactome Gene Sets	Diseases of glycosylation		-6633198097236860	6137175324675320	7550477254985720	DPAGT1|GLB1|HEXA|HEXB|PMM2|CTSA|MAN1B1|ALG6|POMGNT1|ALG1|ALG8|SRD5A3|NUS1	-5112844593416560	42.0	0.0	0.0
1	1	0	0	1	-3.61847e+16	-3.93517e+16	0.0	0.0	-3.37066e+16	GO:0046474	GO Biological Processes	glycerophospholipid biosynthetic process	19_GO:0008152 metabolic process	-6632589817289020	3255795928209720	6.39396e+16	ATM|CLN3|DGKB|PIGA|PIK3R1|PIK3R2|PLA2G6|GNPAT|GPAA1|CDS2|SYNJ1|PITPNM1|IP6K1|FIG4|CEPT1|PIP5K1C|PIK3R4|PIGT|VAC14|PIP4K2C|PTDSS2|PITPNM3|PIGO|PIGS|TTC7B	-4930034956683800	41.0	0.0	0.0
1	0	0	1	1	-3992817506956780	0.0	0.0	-2.70877e+16	-2133563014824880	GO:0022411	GO Biological Processes	cellular component disassembly	19_GO:0009987 cellular process	-6632189195897190	2.71783e+16	6.13492e+16	ADAM10|APEH|ATP2A2|CALM1|CLN3|DHX8|DNASE2|GSK3B|LAMP2|PAFAH1B1|PEX10|PEX2|SH3GL2|VCP|VRK1|GBF1|SYNJ1|SQSTM1|ATG13|CKAP5|DNAJC6|DSTN|WDR45|UFL1|CHMP4A|UBQLN1|PIK3R4|CHMP5|ATG2B|SNX14|VPS16|SLC25A46|MFSD8	-4930034956683800	21.0	0.0	0.0
1	1	0	0	0	-6629005987809570	-3144029750123450	0.0	0.0	0.0	GO:0006766	GO Biological Processes	vitamin metabolic process	19_GO:0008152 metabolic process	-6629005987809570	7577532798833810	7997121084776260	BTD|CYP27A1|FOLR1|SLC2A1|TTPA|PDXK|MMACHC|MCCC1|SLC52A2|PANK2|SLC19A3	-5110394718314750	125.0	0.0	0.0
1	0	0	1	1	-3.1098e+16	0.0	0.0	-2.73765e+16	-4526146203155600	GO:0051651	GO Biological Processes	maintenance of location in cell	19_GO:0051179 localization	-6627252204019140	4.4498e+16	6885582035540810	ATP7B|CALR|FTL|GRIK5|HEXA|HEXB|PAFAH1B1|PSEN1|RANGAP1|RIT2|HSP90B1|GPAA1|RER1|VPS13A|SYNE1|VPS13C|VPS13D	-4926077208697300	105.0	0.0	0.0
1	0	0	1	0	-4748708952536360	0.0	0.0	-6.10691e+16	0.0	R-HSA-68886	Reactome Gene Sets	M Phase		-6626028697657450	2472531066056240	600352963453076	CSNK2B|DYNC1H1|LMNB1|PAFAH1B1|PPP2R2A|PSMA7|PSMC4|PSMC5|PSMC6|PSMD1|PSMD2|PSMD3|RAB1A|RAB2A|RANGAP1|SEC13|TUBB2A|VRK1|YWHAG|NUP214|AAAS|OFD1|USO1|CDC23|ZW10|PSMF1|NUP155|CKAP5|PSMD6|POM121|PSME3|TUBB4A|TUBGCP2|CHMP4A|DYNC1LI1|NUP133|ANAPC1|CEP290|TUBGCP5	-4925830743201920	129.0	0.0	0.0
1	0	0	1	0	-2.98629e+16	0.0	0.0	-5512672802791990	0.0	GO:1903052	GO Biological Processes	positive regulation of proteolysis involved in protein catabolic process	19_GO:0048518 positive regulation of biological process	-6624349619409300	3.85943e+16	6650958562686550	PTK2B|GBA1|GSK3B|ATXN3|PSEN1|PSMC4|PSMC5|PSMC6|TAF1|VCP|WFS1|USP5|BCAP31|STUB1|ZER1|CCDC22|UBQLN2|UBQLN1|DAB2IP|TRIM67	-492512651268499	46.0	0.0	0.0
1	0	0	1	0	-6619636512635140	0.0	0.0	-6076652870351910	0.0	WP623	WikiPathways	Oxidative phosphorylation		-6619636512635140	1.01263e+16	8676734293798350	ATP6|NDUFA10|NDUFS1|NDUFS2|NDUFS3|NDUFV1|NDUFS4|NDUFS8|NDUFS7	-510294832147919	18.0	0.0	0.0
1	0	0	1	0	-6616301470383040	0.0	0.0	-3.25735e+16	0.0	CORUM:178	CORUM	Respiratory chain complex I (holoenzyme), mitochondrial		-6616301470383040	1.22744e+16	9176706960274320	NDUFA10|NDUFS1|NDUFS2|NDUFS3|NDUFV1|NDUFS4|NDUFS8|NDUFS7	-5.10089e+16	18.0	0.0	0.0
1	0	0	0	0	-6616301470383040	0.0	0.0	0.0	0.0	GO:0021587	GO Biological Processes	cerebellum morphogenesis	19_GO:0032502 developmental process	-6616301470383040	1.22744e+16	9176706960274320	DAB1|GBA1|GRID2|OPHN1|SPTBN2|XRCC1|GNPAT|SLC25A46	-5.10089e+16	51.0	0.0	0.0
1	0	0	1	0	-3091997628005370	0.0	0.0	-6606675247946060	0.0	R-HSA-174178	Reactome Gene Sets	APC/C:Cdh1 mediated degradation of Cdc20 and other APC/C:Cdh1 targeted proteins in late mitosis/early G1		-6606675247946060	1.25755e+16	9283699599558760	PSMA7|PSMC4|PSMC5|PSMC6|PSMD2|PSMF1|PSMD6|PSME3	-5093173384229720	52.0	0.0	0.0
1	0	0	1	0	-3091997628005370	0.0	0.0	-6606675247946060	0.0	R-HSA-179419	Reactome Gene Sets	APC:Cdc20 mediated degradation of cell cycle proteins prior to satisfation of the cell cycle checkpoint		-6606675247946060	1.25755e+16	9283699599558760	PSMA7|PSMC4|PSMC5|PSMC6|PSMD2|PSMF1|PSMD6|PSME3	-5093173384229720	52.0	0.0	0.0
1	0	0	1	0	-431347975807425	0.0	0.0	-6213160786111460	0.0	R-HSA-5610787	Reactome Gene Sets	Hedgehog 'off' state		-6604475954845270	4211213565195860	6.78079e+16	ADCY5|GSK3B|PSMA7|PSMC4|PSMC5|PSMC6|PSMD1|PSMD2|PSMD3|TUBB2A|OFD1|PSMF1|PSMD6|PSME3|TUBB4A|RPGRIP1L|IFT172|MKS1	-4909130503184150	52.0	0.0	0.0
1	0	0	0	1	-6597912860520410	0.0	0.0	0.0	-4398639826243870	GO:0046467	GO Biological Processes	membrane lipid biosynthetic process	19_GO:0008152 metabolic process	-6597912860520410	6094556051587300	7514097084756760	ABCA2|ASAH1|B4GALNT1|GBA1|SMPD1|ELOVL4|GPAA1|SPTLC1|PIGT|ELOVL5|FA2H|PIGO|PIGS	-5085045466576380	81.0	0.0	0.0
1	0	0	1	0	-23805365738455	0.0	0.0	-6593577063607530	0.0	R-HSA-5689603	Reactome Gene Sets	UCH proteinases		-6593577063607530	1.02638e+16	8726851582583740	ACTB|PSMA7|PSMC4|PSMC5|PSMC6|PSMD2|PSMF1|PSMD6|PSME3	-5081343213877830	52.0	0.0	0.0
0	1	0	1	0	0.0	-234739356825165	0.0	-2.71619e+16	0.0	GO:0051223	GO Biological Processes	regulation of protein transport	19_GO:0051179 localization	-6592877431736720	2.29223e+16	5887647742313260	ADCY5|CLN3|DMTN|GDI1|GSK3B|HPCA|ITPR1|KCNJ11|NF1|PIK3R1|PIK3R2|PRNP|PSEN1|RANGAP1|RAP1GDS1|SNAP25|ABCC8|BAP1|PLA2G6|KLF7|ADAM9|BRSK2|NPEPPS|ABCG1|ATG13|HUWE1|BCAP31|CPLX1|RUFY3|PLCB1|MTCL1|ATP13A2|PTPN23|ATP2C1|SAR1B|VPS35|TMEM30A|EXOC1|VPS11|DMAP1|XPO4|CEP290|SRCIN1|NDFIP1|NDUFAF2	-489849600817823	68.0	0.0	0.0
1	0	0	1	0	-4.12102e+16	0.0	0.0	-5361649014760330	0.0	GO:0032446	GO Biological Processes	protein modification by small protein conjugation	19_GO:0008152 metabolic process	-6582193431010410	2.0735e+16	5755677005081600	AMFR|ARRB1|DDB1|GPS1|PEX10|PEX2|RANGAP1|HLTF|TAF1|UBA1|UBE2A|UBE3A|VCP|USP5|USP9X|CUL4B|CUL3|CUL2|TNKS|CDC23|NAE1|NEURL1|UBE4A|NPEPPS|MED24|PJA2|HUWE1|STUB1|COPS8|COPS5|RNF13|WDTC1|HECW1|UFL1|ANAPC13|RNF167|TRPC4AP|COPS7A|COPS4|CRBN|RNF216|RNF130|VPS11|IRF2BPL|AKTIP|ANAPC1|DCAF17|DCAF11|RNF170|SYVN1|UBR3|UBE2F|RNF168|HECTD4|NHLRC1|ARK2C	-4.88973e+16	3.0	0.0	0.0
0	0	1	1	1	0.0	0.0	-2350141081343870	-2.9911e+16	-2.95638e+16	GO:0030100	GO Biological Processes	regulation of endocytosis	19_GO:0051179 localization	-657733131754721	2806674489893660	6150881738897680	ABCA2|ACTB|ARRB1|BCR|CALR|CLN3|DLG4|TOR1A|HPCA|LRP1|OPHN1|PPT1|PRKCG|RIT2|ATXN2|SMPD1|SYNJ1|RUBCN|TBC1D5|DNAJC6|SNAP91|SYT11|UBQLN2|ANKFY1|AHI1|VAC14|CAMK1D|SMAP1|STX1B|SIRPA|LRRTM1	-4886784748767860	32.0	0.0	0.0
1	0	0	0	1	-3.88098e+16	0.0	0.0	0.0	-5713015465050270	GO:0046942	GO Biological Processes	carboxylic acid transport	19_GO:0051179 localization	-657733131754721	2806674489893660	6150881738897680	ABCD1|APBA1|CLN3|CLN8|FOLR1|GFAP|GOT2|KCNJ10|NF1|NTRK2|PSAP|PSEN1|SLC2A1|SLC6A1|SLC6A8|SLC16A2|XK|SLC25A11|SLC6A5|SLC23A2|SLC25A15|ARL6IP5|SERINC3|SLC27A4|PRAF2|SLC17A5|SLC38A7|SFXN4|MFSD12|SLC6A19|SLC6A17	-4886784748767860	83.0	0.0	0.0
0	0	1	0	1	0.0	0.0	-6307164356559760	0.0	-2.33214e+16	GO:0006813	GO Biological Processes	potassium ion transport	19_GO:0051179 localization	-6.57456e+16	3.43532e+16	644284058712022	ATP1A3|HCN2|KCNA2|KCNC3|KCND1|KCND2|KCND3|KCNJ10|KCNJ11|KCNQ2|KCNQ3|SNAP25|ABCC8|SLC12A6|SLC9A6|ABCB8|SLC9A8|GHITM|KCNK12|SLC12A9|SLC12A5|KCNT1|NALCN	-488497172191298	127.0	0.0	0.0
1	0	0	1	1	-6573172576706790	0.0	0.0	-2144869017998760	-4229434220640130	GO:0016485	GO Biological Processes	protein processing	19_GO:0008152 metabolic process	-6573172576706790	5166499635568510	7175696430393170	PARP1|CLN3|CLN5|FXN|GLG1|PSEN1|PSEN2|SPG7|PMPCB|PITRM1|AFG3L2|PMPCA|NCSTN|IFT172|HM13	-5062833833177960	106.0	0.0	0.0
0	0	0	1	0	0.0	0.0	0.0	-657126282416078	0.0	R-HSA-6811436	Reactome Gene Sets	COPI-independent Golgi-to-ER retrograde traffic		-657126282416078	1.59659e+16	996069130498496	CAPZB|PAFAH1B1|RAB6A|PLA2G6|TUBB4A|DYNC1LI1|ACTR10	-5061553949461570	133.0	1.0	1.0
1	0	0	0	0	-6555990060360230	0.0	0.0	0.0	0.0	GO:1904356	GO Biological Processes	regulation of telomere maintenance via telomere lengthening	19_GO:0008152 metabolic process	-6555990060360230	9960333723653390	858974674706141	PARP1|ATM|ATR|DKC1|ERCC4|PARN|PNKP|NAT10|CTC1	-5048791565378630	118.0	0.0	0.0
1	0	0	0	1	-3865497567970680	0.0	0.0	0.0	-5696639432507580	GO:0015849	GO Biological Processes	organic acid transport	19_GO:0051179 localization	-6544469919988870	2797095396071500	6.12884e+16	ABCD1|APBA1|CLN3|CLN8|FOLR1|GFAP|GOT2|KCNJ10|NF1|NTRK2|PSAP|PSEN1|SLC2A1|SLC6A1|SLC6A8|SLC16A2|XK|SLC25A11|SLC6A5|SLC23A2|SLC25A15|ARL6IP5|SERINC3|SLC27A4|PRAF2|SLC17A5|SLC38A7|SFXN4|MFSD12|SLC6A19|SLC6A17	-485772464008968	83.0	0.0	0.0
0	0	1	0	1	0.0	0.0	-3944893362824910	0.0	-3.65672e+16	R-HSA-418359	Reactome Gene Sets	Reduction of cytosolic Ca++ levels		-6529179151432020	1.32185e+16	9066567692168500	ATP2A2|ATP2B1|ATP2B2|ATP2B3|CALM1|SLC8A2|SLC8A3	-4846202177013520	84.0	0.0	0.0
1	1	0	1	0	-5.59974e+16	-652770322702461	0.0	-4903533733468920	0.0	R-HSA-196849	Reactome Gene Sets	Metabolism of water-soluble vitamins and cofactors		-652770322702461	1.01158e+16	8646982332202210	MMUT|PC|PCCA|PCCB|PDXK|SLC23A2|NMNAT2|MCCC1|PANK2	-5023000684211310	128.0	0.0	0.0
1	0	0	1	0	-3.03083e+16	0.0	0.0	-6515813697340800	0.0	R-HSA-176409	Reactome Gene Sets	APC/C:Cdc20 mediated degradation of mitotic proteins		-6515813697340800	1.22445e+16	9139645234997750	PSMA7|PSMC4|PSMC5|PSMC6|PSMD2|PSMF1|PSMD6|PSME3	-5012973749871000	52.0	0.0	0.0
0	1	0	1	1	0.0	-2.46814e+16	0.0	-2.2495e+16	-3.31656e+16	GO:0097479	GO Biological Processes	synaptic vesicle localization	19_GO:0051179 localization	-65019687924941	6923992673992670	7.61729e+16	CDH2|DNM1|TOR1A|KIF5A|SYN1|SYNJ1|BSN|AP3D1|SNAP91|TMEM230|SPG11	-4821796743747640	134.0	1.0	1.0
1	1	0	0	0	-3.59554e+16	-650060003046436	0.0	0.0	0.0	WP5031	WikiPathways	Biotin metabolism, including IMDs		-650060003046436	6.19437e+16	1.55447e+16	PC|PCCA|PCCB|MCCC1	-5000231182019300	128.0	0.0	0.0
1	0	0	0	1	-6350660033636870	0.0	0.0	0.0	-4791813378522140	GO:1902652	GO Biological Processes	secondary alcohol metabolic process	19_GO:0008152 metabolic process	-6494975760087200	3955151148064530	6.6169e+16	ACLY|ACO2|APP|CYP27A1|CYB5R3|CLN8|FECH|GBA1|LIPA|MVK|NPC1|SMPD1|TM7SF2|VLDLR|CYP7B1|ABCG1|NPC2|SCAP|CLN6	-4816663647724860	50.0	0.0	0.0
0	1	1	0	1	0.0	-2229990852691850	-4554723771282480	0.0	-2.99431e+16	R-HSA-112310	Reactome Gene Sets	Neurotransmitter release cycle		-6483555809177390	6.22049e+16	7.39813e+16	APBA1|SLC6A1|SNAP25|STXBP1|SYN1|ALDH5A1|PPFIA4|PPFIA3|ARL6IP5|CPLX1|RIMS1|DNAJC5	-4806170686456020	135.0	1.0	1.0
1	0	0	0	0	-6478709862928460	0.0	0.0	0.0	0.0	GO:0006488	GO Biological Processes	dolichol-linked oligosaccharide biosynthetic process	19_GO:0008152 metabolic process	-6478709862928460	2.02527e+16	1.05609e+16	DPAGT1|ALG6|ALG1|ALG8|SRD5A3|NUS1	-4981410246211080	42.0	0.0	0.0
1	0	0	0	0	-6478709862928460	0.0	0.0	0.0	0.0	GO:0006625	GO Biological Processes	protein targeting to peroxisome	19_GO:0051179 localization	-6478709862928460	2.02527e+16	1.05609e+16	PEX6|PEX7|PEX10|PEX2|USP9X|PEX3	-4981410246211080	37.0	0.0	0.0
1	0	0	0	0	-6478709862928460	0.0	0.0	0.0	0.0	GO:0072662	GO Biological Processes	protein localization to peroxisome	19_GO:0051179 localization	-6478709862928460	2.02527e+16	1.05609e+16	PEX6|PEX7|PEX10|PEX2|USP9X|PEX3	-4981410246211080	37.0	0.0	0.0
1	0	0	0	0	-6478709862928460	0.0	0.0	0.0	0.0	GO:0072663	GO Biological Processes	establishment of protein localization to peroxisome	19_GO:0051179 localization	-6478709862928460	2.02527e+16	1.05609e+16	PEX6|PEX7|PEX10|PEX2|USP9X|PEX3	-4981410246211080	37.0	0.0	0.0
1	0	0	0	1	-5289388819916630	0.0	0.0	0.0	-3.08387e+16	GO:0062197	GO Biological Processes	cellular response to chemical stress	19_GO:0050896 response to stimulus	-6472365700934370	2.83254e+16	6108184117114950	PARP1|ATM|ATP2A2|FXN|MTOR|MAPT|MPV17|PEX10|PEX2|SCN2A|SLC2A1|PRDX2|PRKRA|SQSTM1|AIFM1|LONP1|SLC12A6|ARL6IP5|CAMKK2|SETX|ATP13A2|PYCR2|CAB39|TMEM161A|ADPRS|SMPD3|TBC1D24|ERMP1|AGAP3|SIRPA	-4795905593433630	58.0	0.0	0.0
1	0	0	1	0	-3000969214201420	0.0	0.0	-6471386506492940	0.0	R-HSA-176814	Reactome Gene Sets	Activation of APC/C and APC/C:Cdc20 mediated degradation of mitotic proteins		-6471386506492940	1.20855e+16	906962809287136	PSMA7|PSMC4|PSMC5|PSMC6|PSMD2|PSMF1|PSMD6|PSME3	-4975918070908340	52.0	0.0	0.0
1	0	0	1	0	-6459697606009160	0.0	0.0	-4349088005643520	0.0	GO:0009144	GO Biological Processes	purine nucleoside triphosphate metabolic process	19_GO:0008152 metabolic process	-6459697606009160	5929838320463320	7.37194e+16	PARP1|ATP6|NDUFA10|NDUFS1|NDUFS2|NDUFS3|NDUFV1|NDUFS4|NDUFS8|OPA1|SDHA|VCP|NDUFS7	-4967868530955590	18.0	0.0	0.0
0	0	1	0	0	0.0	0.0	-6457920104548510	0.0	0.0	GO:1901880	GO Biological Processes	negative regulation of protein depolymerization	19_GO:0048519 negative regulation of biological process	-6457920104548510	1550974358974350	9792182241736190	ADD2|DMTN|MAP1B|SPTB|SPTBN1|APC2|TMOD2	-4966694635543320	36.0	0.0	0.0
1	0	0	1	0	-2651189633423660	0.0	0.0	-6451880479203780	0.0	WP78	WikiPathways	TCA cycle (aka Krebs or citric acid cycle)		-6451880479203780	3231196581196580	1.2374e+16	ACO2|MDH2|OGDH|SDHA|SUCLA2	-4961257778486750	35.0	0.0	0.0
1	1	0	1	0	-3254302020390690	-2.83253e+16	0.0	-6448250386607440	0.0	R-HSA-5688426	Reactome Gene Sets	Deubiquitination		-6448250386607440	5464842540010320	7212721998618360	ACTB|ATXN3|PSMA7|PSMC4|PSMC5|PSMC6|PSMD2|VDAC2|STAM|USP5|PSMF1|PSMD6|PSME3|BABAM1	-4958229618740620	52.0	0.0	0.0
0	0	0	0	1	0.0	0.0	0.0	0.0	-6443549051833290	GO:1903076	GO Biological Processes	regulation of protein localization to plasma membrane	19_GO:0051179 localization	-6443549051833290	9856816947311240	8514813711338480	CLN3|CLTC|LRP1|PDPK1|PRNP|TMEM59|RER1|ATP2C1|NHLRC1	-4954129383691360	108.0	0.0	0.0
0	0	0	1	0	0.0	0.0	0.0	-6439347244726150	0.0	CORUM:2174	CORUM	COP9 signalosome complex		-6439347244726150	5816153846153840	1.50571e+16	COPS8|COPS5|COPS7A|COPS4	-4951127285860690	66.0	0.0	0.0
0	0	0	1	0	0.0	0.0	0.0	-6439347244726150	0.0	GO:0006729	GO Biological Processes	tetrahydrobiopterin biosynthetic process	19_GO:0008152 metabolic process	-6439347244726150	5816153846153840	1.50571e+16	GCH1|PTS|QDPR|SPR	-4951127285860690	94.0	0.0	0.0
1	1	0	1	0	-3.5452e+16	-3010198416185240	0.0	-2.72206e+16	0.0	GO:0022029	GO Biological Processes	telencephalon cell migration	19_GO:0032502 developmental process	-6434181364535120	5634128166915050	7183410896140660	DAB1|FOXG1|OGDH|PAFAH1B1|RELN|PSEN1|NKX2-1|TNR|ADGRG1|RTN4|DAB2IP|ARX|ARL13B	-4760484539836480	6.0	0.0	0.0
1	0	0	1	0	-6.41991e+16	0.0	0.0	-2.25765e+16	0.0	GO:0019395	GO Biological Processes	fatty acid oxidation	19_GO:0008152 metabolic process	-6.41991e+16	8232796167247380	8041842134237290	ACAA1|ACAT1|ABCD1|AUH|ECHS1|HSD17B4|PEX7|PHYH|PEX2|ILVBL	-4935394109206310	39.0	0.0	0.0
0	0	0	0	1	0.0	0.0	0.0	0.0	-6419440993584370	GO:1905146	GO Biological Processes	lysosomal protein catabolic process	19_GO:0008152 metabolic process	-6419440993584370	5749809885931550	1496869402769490	TPP1|CLN3|LAMP2|VPS13A	-4935394109206310	136.0	1.0	1.0
0	1	1	0	1	0.0	-3.85219e+16	-468869198481159	0.0	-2612341715608020	GO:0048638	GO Biological Processes	regulation of developmental growth	19_GO:0040007 growth	-6416719490438900	2.65983e+16	5992758741369450	APP|CDH4|MEGF8|FXN|GDI1|GSK3B|L1CAM|MAG|MAP1B|MAPT|NRCAM|PAFAH1B1|LGMN|SLC6A3|SLIT1|CDKL5|TNR|ATRN|CTDP1|MAP3K13|RIMS2|SLC23A2|SEMA6B|AFG3L2|RUFY3|RIMS1|UNC13A|SPART|PLCB1|RTN4|FTO|SYT3|ARX	-4.74394e+16	38.0	0.0	0.0
1	0	0	1	0	-6392287803814070	0.0	0.0	-4307710403840390	0.0	GO:0009199	GO Biological Processes	ribonucleoside triphosphate metabolic process	19_GO:0008152 metabolic process	-6392287803814070	585077380952381	7302795750722920	PARP1|ATP6|NDUFA10|NDUFS1|NDUFS2|NDUFS3|NDUFV1|NDUFS4|NDUFS8|OPA1|SDHA|VCP|NDUFS7	-4910017177461810	18.0	0.0	0.0
1	0	0	0	0	-6384157313588650	0.0	0.0	0.0	0.0	GO:0021575	GO Biological Processes	hindbrain morphogenesis	19_GO:0032502 developmental process	-6384157313588650	1.14909e+16	882574688688944	DAB1|GBA1|GRID2|OPHN1|SPTBN2|XRCC1|GNPAT|SLC25A46	-4903066836011240	51.0	0.0	0.0
1	0	0	0	1	-5849353155779540	0.0	0.0	0.0	-5052881252660130	GO:0008203	GO Biological Processes	cholesterol metabolic process	19_GO:0008152 metabolic process	-6372000256499070	4067240451855830	6.59086e+16	ACLY|APP|CYP27A1|CYB5R3|CLN8|FECH|GBA1|LIPA|MVK|NPC1|SMPD1|TM7SF2|VLDLR|CYP7B1|ABCG1|NPC2|SCAP|CLN6	-4702870187674730	50.0	0.0	0.0
1	1	0	1	0	-3550966792828840	-6363602117065400	0.0	-4461435781922140	0.0	R-HSA-3296482	Reactome Gene Sets	Defects in vitamin and cofactor metabolism		-6363602117065400	3167574361122740	1.22358e+16	MMUT|PC|PCCA|PCCB|MCCC1	-4.88369e+16	128.0	0.0	0.0
0	0	1	0	1	0.0	0.0	-2.2e+16	0.0	-6362685121206100	GO:1904645	GO Biological Processes	response to amyloid-beta	19_GO:0050896 response to stimulus	-6362685121206100	1490691451908180	9579952602398050	APP|ATP1A3|CACNA1A|LRP1|PRNP|PSEN1|BACE1	-4883358875500620	101.0	0.0	0.0
0	1	1	0	0	0.0	-2.69618e+16	-400041759461915	0.0	0.0	GO:0045773	GO Biological Processes	positive regulation of axon extension	19_GO:0040007 growth	-6.35019e+16	7553446553446550	7691562297553640	CDH4|MEGF8|GDI1|L1CAM|MAP1B|MAPT|PAFAH1B1|CDKL5|MAP3K13|RUFY3	-4682877666655090	38.0	0.0	0.0
1	0	0	0	0	-6338039055548120	0.0	0.0	0.0	0.0	GO:0006490	GO Biological Processes	oligosaccharide-lipid intermediate biosynthetic process	19_GO:0008152 metabolic process	-6338039055548120	1.92883e+16	1.02798e+16	DPAGT1|ALG6|ALG1|ALG8|SRD5A3|NUS1	-486221991758434	42.0	0.0	0.0
0	1	1	0	0	0.0	-3.23638e+16	-6330051458361710	0.0	0.0	R-HSA-212676	Reactome Gene Sets	Dopamine Neurotransmitter Release Cycle		-6330051458361710	3.13085e+16	1.21588e+16	APBA1|STXBP1|PPFIA4|PPFIA3|CPLX1	-4855395090789710	135.0	0.0	0.0
1	0	0	1	0	-2.88611e+16	0.0	0.0	-6299956974438650	0.0	R-HSA-176408	Reactome Gene Sets	Regulation of APC/C activators between G1/S and early anaphase		-6299956974438650	1.14887e+16	880199640917014	PSMA7|PSMC4|PSMC5|PSMC6|PSMD2|PSMF1|PSMD6|PSME3	-4829345960631380	52.0	0.0	0.0
0	0	0	1	0	0.0	0.0	0.0	-6298173407520540	0.0	R-HSA-109581	Reactome Gene Sets	Apoptosis		-6298173407520540	7.10863e+16	7654400679627540	OPA1|PSMA7|PSMC4|PSMC5|PSMC6|PSMD2|PSMF1|PSMD6|BCAP31|PSME3|YWHAQ	-4828137237585290	52.0	0.0	0.0
1	0	0	0	1	-6204839597884070	0.0	0.0	0.0	-4693987585892200	GO:0016125	GO Biological Processes	sterol metabolic process	19_GO:0008152 metabolic process	-6281303064965730	3.83438e+16	6446086803009000	ACLY|APP|CYP27A1|CYB5R3|CLN8|FECH|GBA1|LIPA|MVK|NPC1|SMPD1|TM7SF2|VLDLR|CYP7B1|ABCG1|NPC2|SCAP|CYB5R1|CLN6	-4620274060743910	50.0	0.0	0.0
0	1	1	0	1	0.0	-2410621223863390	-4872661868445330	0.0	-323867397938411	GO:0106027	GO Biological Processes	neuron projection organization	19_GO:0009987 cellular process	-6278843318556850	6609265734265730	7382574428551910	ABCD1|APP|ATP1A3|DLG4|GSK3B|MAP1A|PRNP|LGMN|PSEN1|KIFBP|SHANK3	-4618705175123100	101.0	0.0	0.0
1	1	0	1	0	-3712175789420460	-4.01013e+16	0.0	-2.77088e+16	0.0	GO:1901605	GO Biological Processes	alpha-amino acid metabolic process	19_GO:0008152 metabolic process	-6266580283948540	320449247721975	6170592078249180	ACAT1|AMT|AUH|GART|GCDH|GFPT1|GLDC|GOT2|MECP2|ALDH6A1|MTHFD1|MMUT|OTC|QDPR|TH|ALDH5A1|PLOD3|SERINC3|ILVBL|HIBCH|PYCR2|MCCC1|DGLUCY|NAT8L	-4611749267435730	24.0	0.0	0.0
0	0	1	0	0	0.0	0.0	-5292620644902320	0.0	0.0	GO:0060079	GO Biological Processes	excitatory postsynaptic potential	19_GO:0032501 multicellular organismal process	-6.26206e+16	5455266955266950	7018691376409490	CHRNA4|CHRNB2|GLRA1|GLRB|GRID2|GRIK2|GRIK5|GRIN1|GSK3B|MECP2|MPP2|MAPK8IP2|CELF4	-4608109230212250	119.0	0.0	0.0
0	0	1	0	0	0.0	0.0	-6.2618e+16	0.0	0.0	GO:0110053	GO Biological Processes	regulation of actin filament organization	19_GO:0050789 regulation of biological process	-6.2618e+16	6307403545359740	7379543787551290	ADD2|CTNNA2|DMTN|PTK2B|PIK3R1|SPTB|SPTBN1|CIT|CYFIP2|TMOD2|SHANK3|CARMIL2	-4793487765000300	36.0	0.0	0.0
0	0	0	1	0	0.0	0.0	0.0	-6258588107240120	0.0	R-HSA-2871837	Reactome Gene Sets	FCERI mediated NF-kB activation		-6258588107240120	1134859287054400	8738008925209230	PSMA7|PSMC4|PSMC5|PSMC6|PSMD2|PSMF1|PSMD6|PSME3	-4790843734084450	52.0	0.0	0.0
1	0	1	0	0	-2095037142885600	0.0	-4.39167e+16	0.0	0.0	M69	Canonical Pathways	PID REELIN PATHWAY		-6256552830253140	8497627372627370	7869793461563310	DAB1|RAPGEF1|GSK3B|MAP1B|MAPT|PAFAH1B1|PIK3R1|RELN|VLDLR	-4.60435e+16	109.0	0.0	0.0
1	0	0	1	0	-6223938371769830	0.0	0.0	-5015705171028200	0.0	GO:0006754	GO Biological Processes	ATP biosynthetic process	19_GO:0008152 metabolic process	-6223938371769830	7849875415282390	7800152413079520	ATP6|NDUFA10|NDUFS1|NDUFS2|NDUFS3|NDUFV1|NDUFS4|NDUFS8|SDHA|NDUFS7	-4760816621964590	18.0	0.0	0.0
1	0	0	1	0	-2.71601e+16	0.0	0.0	-6223448247599620	0.0	CORUM:193	CORUM	PA700-20S-PA28 complex		-6223448247599620	1.93872e+16	1.02792e+16	PSMA7|PSMC4|PSMC5|PSMC6|PSMD2|PSMD6	-4760816621964590	52.0	0.0	0.0
0	0	0	1	0	0.0	0.0	0.0	-621778430669679	0.0	R-HSA-1168372	Reactome Gene Sets	Downstream signaling events of B Cell Receptor (BCR)		-621778430669679	1.12119e+16	8675119676923660	PSMA7|PSMC4|PSMC5|PSMC6|PSMD2|PSMF1|PSMD6|PSME3	-4757405835178650	52.0	0.0	0.0
0	0	0	1	0	0.0	0.0	0.0	-621778430669679	0.0	R-HSA-195253	Reactome Gene Sets	Degradation of beta-catenin by the destruction complex		-621778430669679	1.12119e+16	8675119676923660	PSMA7|PSMC4|PSMC5|PSMC6|PSMD2|PSMF1|PSMD6|PSME3	-4757405835178650	52.0	0.0	0.0
0	0	0	1	0	0.0	0.0	0.0	-621778430669679	0.0	R-HSA-69202	Reactome Gene Sets	Cyclin E associated events during G1/S transition		-621778430669679	1.12119e+16	8675119676923660	PSMA7|PSMC4|PSMC5|PSMC6|PSMD2|PSMF1|PSMD6|PSME3	-4757405835178650	52.0	0.0	0.0
0	0	0	1	1	0.0	0.0	0.0	-3.34795e+16	-3325302234647740	GO:0008333	GO Biological Processes	endosome to lysosome transport	19_GO:0051179 localization	-6206724377346410	5001606501606500	6833473856756910	LYST|LIPA|SORT1|VCP|RAB7A|AP3D1|VPS41|CHMP4A|CHMP5|ARL8B|VPS11|CACNG8|AKTIP|VPS16	-4555395754669670	29.0	0.0	0.0
1	0	0	0	0	-6205192236688410	0.0	0.0	0.0	0.0	GO:0019348	GO Biological Processes	dolichol metabolic process	19_GO:0008152 metabolic process	-6205192236688410	1.84115e+16	1.00175e+16	DPAGT1|ALG6|ALG1|ALG8|SRD5A3|NUS1	-4746702651248530	42.0	0.0	0.0
1	0	0	1	0	-3.71971e+16	0.0	0.0	-6200427008192760	0.0	CORUM:32	CORUM	PA700 complex		-6200427008192760	2908076923076920	1169775044660500	PSMC4|PSMC5|PSMC6|PSMD2|PSMD6	-4742848639746000	52.0	0.0	0.0
1	1	0	0	0	-4468908848515650	-3877674561735090	0.0	0.0	0.0	hsa03013	KEGG Pathway	Nucleocytoplasmic transport		-6198070054977010	4161389536389530	6525683977024730	CSE1L|EEF1A2|KPNA1|NCBP1|RANGAP1|SEC13|NUP214|AAAS|NUP155|POM121|TNPO2|IPO11|DDX19A|NUP133|XPO5|XPO4|POM121C	-454761263516395	88.0	0.0	0.0
0	1	1	0	0	0.0	-2141696305360740	-6194822067334090	0.0	0.0	GO:0032970	GO Biological Processes	regulation of actin filament-based process	19_GO:0050789 regulation of biological process	-6194822067334090	5196563573883160	6956797344397100	ADD2|ANK2|CTNNA2|DMTN|PTK2B|PIK3R1|SPTB|SPTBN1|CIT|CYFIP2|CTNNA3|TMOD2|SHANK3|CARMIL2	-4738468502289690	36.0	0.0	0.0
1	0	0	0	1	-4864702706724220	0.0	0.0	0.0	-6.19438e+16	GO:0046466	GO Biological Processes	membrane lipid catabolic process	19_GO:0008152 metabolic process	-6.19438e+16	1.9166e+16	1.02145e+16	ASAH1|GBA1|HEXA|NEU1|PPT1|SMPD1	-4738468502289690	81.0	0.0	0.0
1	0	0	0	0	-6189151867242070	0.0	0.0	0.0	0.0	GO:0006302	GO Biological Processes	double-strand break repair	19_GO:0050896 response to stimulus	-6189151867242070	4822066326530610	681512361198898	PARP1|ATM|DDX1|ERCC4|MLH1|MRE11|PRKDC|VCP|XRCC1|XRCC4|AP5Z1|PNKP|SETX|ZFYVE26|RNF168	-4.73389e+16	85.0	0.0	0.0
0	0	0	1	0	0.0	0.0	0.0	-6187022950702970	0.0	CORUM:2179	CORUM	CNS-P53 complex		-6187022950702970	516991452991453	1.41652e+16	COPS8|COPS5|COPS7A|COPS4	-4.73389e+16	66.0	0.0	0.0
0	0	0	1	0	0.0	0.0	0.0	-6187022950702970	0.0	GO:0042416	GO Biological Processes	dopamine biosynthetic process	19_GO:0008152 metabolic process	-6187022950702970	516991452991453	1.41652e+16	DDC|GCH1|SLC6A3|TH	-4.73389e+16	86.0	0.0	0.0
0	0	0	1	0	0.0	0.0	0.0	-6187022950702970	0.0	GO:0046146	GO Biological Processes	tetrahydrobiopterin metabolic process	19_GO:0008152 metabolic process	-6187022950702970	516991452991453	1.41652e+16	GCH1|PTS|QDPR|SPR	-4.73389e+16	94.0	0.0	0.0
0	0	0	1	0	0.0	0.0	0.0	-6187022950702970	0.0	WP4297	WikiPathways	Thiamine metabolic pathways		-6187022950702970	516991452991453	1.41652e+16	OGDH|PDHA1|TKT|SLC19A3	-4.73389e+16	137.0	1.0	1.0
0	1	0	1	1	0.0	-2.07513e+16	0.0	-6179024640883350	-2785050108238950	R-HSA-917937	Reactome Gene Sets	Iron uptake and transport		-6179024640883350	1403899204244030	925570613151436	ATP6V1A|ATP6AP1|CP|FTL|ATP6V0D1|ATP6V1D|ATP6V1H	-4726732690466410	93.0	0.0	0.0
0	1	1	0	0	0.0	-3700450239014770	-6178764438413310	0.0	0.0	GO:0032412	GO Biological Processes	regulation of monoatomic ion transmembrane transporter activity	19_GO:0051179 localization	-6178764438413310	6194367639528920	7288583587536460	ANK2|HCN2|DLG4|PTK2B|FGF12|ABCC8|HECW1|MAPK8IP2|SCN3B|JPH3|JPH4|SHANK3	-4726732690466410	138.0	1.0	1.0
1	1	0	1	0	-3.43097e+16	-2931986594579600	0.0	-2.6453e+16	0.0	GO:0021885	GO Biological Processes	forebrain cell migration	19_GO:0032502 developmental process	-6178670954190660	5370028409090900	6938947186605380	DAB1|FOXG1|OGDH|PAFAH1B1|RELN|PSEN1|NKX2-1|TNR|ADGRG1|RTN4|DAB2IP|ARX|ARL13B	-4529082993090220	6.0	0.0	0.0
0	1	1	0	1	0.0	-2.67056e+16	-351576661433202	0.0	-6177683940027300	GO:0006814	GO Biological Processes	sodium ion transport	19_GO:0051179 localization	-6177683940027300	6912339753578920	751364146729003	ATP1A3|SCN1A|SCN2A|SCN8A|SLC6A1|SLC6A5|SLC23A2|SLC9A6|SLC38A7|SCN3B|SLC4A10	-4726202977800260	47.0	0.0	0.0
0	1	1	0	1	0.0	-3.64062e+16	-3795749422031230	0.0	-3.22519e+16	GO:0043549	GO Biological Processes	regulation of kinase activity	19_GO:0008152 metabolic process	-6172576594031110	2.02795e+16	5523315662231140	ACTB|ADAR|APP|DDR1|CALM1|DAB1|DLG4|DOCK3|EEF1A2|PTK2B|MTOR|GBA1|HTT|MAPT|MAP3K10|MRE11|NF1|NTRK2|PDPK1|PHB1|PIK3R1|PIK3R2|PRNP|RELN|PSEN1|SLC8A2|SLC8A3|SMPD1|THY1|TPD52L1|UCHL1|VLDLR|WARS1|YWHAG|ADAM9|NEURL1|MAP3K13|RAPGEF2|RUBCN|RASSF2|PIBF1|CAMKK2|COPS8|PIK3R4|GPRC5B|CAB39|VAC14|DBNDD1|PIP4K2C|SRCIN1|STRADA|AGAP2|WDR81|DAB2IP|NHLRC1	-4523856354461900	139.0	1.0	1.0
1	0	0	0	0	-6153824087826000	0.0	0.0	0.0	0.0	GO:0000038	GO Biological Processes	very long-chain fatty acid metabolic process	19_GO:0008152 metabolic process	-6153824087826000	1.35018e+16	9074241998331240	ACAA1|ABCD1|HSD17B4|PEX2|ELOVL4|SLC27A4|ELOVL5	-470289321367999	140.0	1.0	1.0
1	0	0	1	0	-479329786539646	0.0	0.0	-6149734602419920	0.0	GO:0007007	GO Biological Processes	inner mitochondrial membrane organization	19_GO:0009987 cellular process	-6149734602419920	1.88632e+16	1.01242e+16	TIMM8A|HSPA9|OPA1|IMMT|SAMM50|GHITM	-4699901818572960	141.0	1.0	1.0
0	0	0	1	0	0.0	0.0	0.0	-6148532287008460	0.0	R-HSA-9020702	Reactome Gene Sets	Interleukin-1 signaling		-6148532287008460	9103545150501670	8107481041689550	PSMA7|PSMC4|PSMC5|PSMC6|PSMD2|SQSTM1|PSMF1|PSMD6|PSME3	-4699667991539580	52.0	0.0	0.0
0	0	1	0	0	0.0	0.0	-6144160334646660	0.0	0.0	GO:0016081	GO Biological Processes	synaptic vesicle docking	19_GO:0051179 localization	-6144160334646660	5237056277056270	1.4249e+16	PPFIA3|SNPH|UNC13A|STX1B	-4696515436947870	71.0	0.0	0.0
0	0	1	0	0	0.0	0.0	-6144160334646660	0.0	0.0	GO:0097107	GO Biological Processes	postsynaptic density assembly	19_GO:0032502 developmental process	-6144160334646660	5237056277056270	1.4249e+16	NRXN1|NRXN2|SLITRK3|SHANK3	-4696515436947870	63.0	0.0	0.0
1	0	0	0	0	-6142153055136690	0.0	0.0	0.0	0.0	GO:0006413	GO Biological Processes	translational initiation	19_GO:0008152 metabolic process	-6142153055136690	8935005252100840	8032362469938450	EIF2B1|NCBP1|EIF2B4|EIF2B3|EIF2B2|EIF2B5|COPS5|DHX29|MTFMT	-4695053411096340	77.0	0.0	0.0
0	0	0	1	0	0.0	0.0	0.0	-6137815756647840	0.0	R-HSA-69656	Reactome Gene Sets	Cyclin A:Cdk2-associated events at S phase entry		-6137815756647840	1.09481e+16	85525075335746	PSMA7|PSMC4|PSMC5|PSMC6|PSMD2|PSMF1|PSMD6|PSME3	-469126068256212	52.0	0.0	0.0
0	0	1	0	0	0.0	0.0	-6136592355634210	0.0	0.0	GO:0097106	GO Biological Processes	postsynaptic density organization	19_GO:0009987 cellular process	-6136592355634210	2.88038e+16	1.16292e+16	DLG4|NRXN1|NRXN2|SLITRK3|SHANK3	-4690581169511740	63.0	0.0	0.0
1	0	1	0	0	-2288296628840720	0.0	-6028403681918180	0.0	0.0	GO:0043242	GO Biological Processes	negative regulation of protein-containing complex disassembly	19_GO:0048519 negative regulation of biological process	-6132272004074880	4934918414918410	6764954172819360	ADD1|ADD2|CAPZB|DMTN|FLII|MAP1B|ATXN7|SPTB|SPTBN1|SPTBN2|RUBCN|APC2|TMOD2|TTBK2	-4484417755783440	36.0	0.0	0.0
1	0	0	1	0	-6129957429486310	0.0	0.0	-2.15006e+16	0.0	GO:0034440	GO Biological Processes	lipid oxidation	19_GO:0008152 metabolic process	-6129957429486310	7671469155844150	7685080308065010	ACAA1|ACAT1|ABCD1|AUH|ECHS1|HSD17B4|PEX7|PHYH|PEX2|ILVBL	-4684489451041800	39.0	0.0	0.0
1	0	0	0	0	-6119294618528700	0.0	0.0	0.0	0.0	R-HSA-73894	Reactome Gene Sets	DNA Repair		-6119294618528700	382886460554371	6.38419e+16	PARP1|ATM|ATR|DDB1|ERCC4|GPS1|MLH1|MRE11|PRKDC|RFC1|VCP|XRCC1|XRCC4|CUL4B|RUVBL1|COPS5|PNKP|ADPRS|RNF168	-4674369169176480	85.0	0.0	0.0
1	0	0	1	0	-6098972234095870	0.0	0.0	-2211748858994300	0.0	GO:0008033	GO Biological Processes	tRNA processing	19_GO:0008152 metabolic process	-6098972234095870	6045575692963750	7177615770626000	AARS1|DDX1|ELP1|TRNT1|DUS2|NAT10|ELP2|AARS2|ELAC2|THADA|MTFMT|TSEN54	-4655670317407860	45.0	0.0	0.0
1	0	1	0	1	-3550966792828840	0.0	-3.33627e+16	0.0	-4442012557110740	WP4760	WikiPathways	PKC-gamma calcium signaling pathway in ataxia		-6089079157368020	961347743165925	801322269586821	ATP2B2|CA8|CACNA1A|GRIA2|GRIA3|ITPR1|PRKCG|PLCB1	-444723897426833	90.0	0.0	0.0
1	1	0	0	0	-3.31193e+16	-6.08736e+16	0.0	0.0	0.0	R-HSA-196780	Reactome Gene Sets	Biotin transport and metabolism		-6.08736e+16	5.06812e+16	1.40099e+16	PC|PCCA|PCCB|MCCC1	-464459715566787	128.0	0.0	0.0
1	0	0	1	1	-3.13039e+16	0.0	0.0	-3.71185e+16	-3.67488e+16	GO:0090150	GO Biological Processes	establishment of protein localization to membrane	19_GO:0051179 localization	-6067582816188280	2.96277e+16	5950395569665350	ATP6AP1|BCS1L|TIMM8A|NPC1|SNAP25|SPTBN1|SRP54|SRPRA|SSR1|RAB7A|PEX3|EMC2|TMEM147|CLSTN1|NOMO1|SAMM50|NSG1|CHMP4A|TMCO1|SEC61A2|VPS35|CCDC47|SIL1|REEP1|MMGT1|STX1B	-4426595026849760	26.0	0.0	0.0
1	0	0	1	0	-271617562281593	0.0	0.0	-6053957608419660	0.0	GO:1901800	GO Biological Processes	positive regulation of proteasomal protein catabolic process	19_GO:0048518 positive regulation of biological process	-6053957608419660	8872099087353320	7978387835602920	ATXN3|PSMC4|PSMC5|PSMC6|TAF1|USP5|BCAP31|UBQLN2|UBQLN1	-4614955672224370	142.0	1.0	1.0
0	0	0	1	0	0.0	0.0	0.0	-6042810677804780	0.0	R-HSA-446652	Reactome Gene Sets	Interleukin-1 family signaling		-6042810677804780	7602815485168420	7624491600489750	PSMA7|PSMC4|PSMC5|PSMC6|PSMD2|SQSTM1|PSMF1|PSMD6|PSME3|PTPN23	-4605410321108300	52.0	0.0	0.0
1	0	0	1	0	-2.70097e+16	0.0	0.0	-6021763289473320	0.0	R-HSA-174143	Reactome Gene Sets	APC/C-mediated degradation of cell cycle proteins		-6021763289473320	1.05748e+16	837605741977843	PSMA7|PSMC4|PSMC5|PSMC6|PSMD2|PSMF1|PSMD6|PSME3	-4588077141576910	52.0	0.0	0.0
1	0	0	1	0	-2.70097e+16	0.0	0.0	-6021763289473320	0.0	R-HSA-450531	Reactome Gene Sets	Regulation of mRNA stability by proteins that bind AU-rich elements		-6021763289473320	1.05748e+16	837605741977843	PSMA7|PSMC4|PSMC5|PSMC6|PSMD2|PSMF1|PSMD6|PSME3	-4588077141576910	52.0	0.0	0.0
1	0	0	1	0	-2.70097e+16	0.0	0.0	-6021763289473320	0.0	R-HSA-453276	Reactome Gene Sets	Regulation of mitotic cell cycle		-6021763289473320	1.05748e+16	837605741977843	PSMA7|PSMC4|PSMC5|PSMC6|PSMD2|PSMF1|PSMD6|PSME3	-4588077141576910	52.0	0.0	0.0
1	1	0	1	1	-2021660371549430	-3150612780753170	0.0	-2860063589503830	-3.89516e+16	R-HSA-432722	Reactome Gene Sets	Golgi Associated Vesicle Biogenesis		-6.01308e+16	5665084915084910	6928119158331840	AP1B1|ARRB1|CLTC|CPD|FTL|IGF2R|SORT1|SH3GL2|TPD52L1|PUM1|DNAJC6|TGOLN2	-4376329208603010	122.0	0.0	0.0
1	1	0	1	1	-2.61076e+16	-2.13629e+16	0.0	-2.81168e+16	-2.22109e+16	GO:0051222	GO Biological Processes	positive regulation of protein transport	19_GO:0051179 localization	-6011483145726840	2643706293706290	5767686417786510	CLN3|GSK3B|HPCA|ITPR1|PIK3R1|PIK3R2|PRNP|PSEN1|ABCC8|BAP1|PLA2G6|ADAM9|NPEPPS|ABCG1|ATG13|HUWE1|BCAP31|RUFY3|PLCB1|MTCL1|ATP13A2|PTPN23|ATP2C1|SAR1B|VPS35|TMEM30A|EXOC1|VPS11|DMAP1|XPO4|CEP290	-4375574881917590	68.0	0.0	0.0
0	1	1	1	0	0.0	-3.56547e+16	-5986458963182900	-2.41271e+16	0.0	GO:0022898	GO Biological Processes	regulation of transmembrane transporter activity	19_GO:0051179 localization	-5986458963182900	5.93893e+16	7079045085960410	ANK2|HCN2|DLG4|PTK2B|FGF12|ABCC8|HECW1|MAPK8IP2|SCN3B|JPH3|JPH4|SHANK3	-4554354946296370	138.0	0.0	0.0
1	0	0	0	1	-4739234067281230	0.0	0.0	0.0	-5984756940072440	GO:0009101	GO Biological Processes	glycoprotein biosynthetic process	19_GO:0008152 metabolic process	-5984756940072440	5416487573703640	6903509480921270	EXT2|STT3A|MAN2A2|NPC1|PSEN1|RPN2|PLOD3|TMEM59|MAN1B1|UGGT1|DHDDS|NUS1|STT3B	-4.55354e+16	65.0	0.0	0.0
1	0	0	1	0	-4724098025911860	0.0	0.0	-474511510174987	0.0	R-HSA-5696394	Reactome Gene Sets	DNA Damage Recognition in GG-NER		-5984263224584850	6957121825542870	7285521152301040	ACTB|PARP1|DDB1|GPS1|CUL4B|RUVBL1|COPS8|COPS5|COPS7A|COPS4	-4351708602783190	66.0	0.0	0.0
0	0	0	1	0	0.0	0.0	0.0	-5984069898966770	0.0	R-HSA-5687128	Reactome Gene Sets	MAPK6/MAPK4 signaling		-5984069898966770	1045600691443380	831912102034167	PSMA7|PSMC4|PSMC5|PSMC6|PSMD2|PSMF1|PSMD6|PSME3	-4.55354e+16	52.0	0.0	0.0
1	0	0	0	1	-4656979723577410	0.0	0.0	0.0	-597983966429284	hsa00513	KEGG Pathway	Various types of N-glycan biosynthesis		-597983966429284	1769172272594320	9769251653844910	HEXA|STT3A|MAN2A2|RPN2|MAN1B1|STT3B	-4549836229406650	65.0	0.0	0.0
0	1	0	1	0	0.0	-2.37147e+16	0.0	-5199579372478770	0.0	R-HSA-5673001	Reactome Gene Sets	RAF/MAP kinase cascade		-5.97485e+16	2738124375624370	5.79347e+16	ACTB|ARRB1|CALM1|DLG4|DUSP8|GRIN1|NCAM1|NF1|PHB1|PIK3R1|PIK3R2|PSMA7|PSMC4|PSMC5|PSMC6|PSMD1|PSMD2|PSMD3|SPTB|SPTBN1|SPTBN2|CUL3|SYNGAP1|PSMF1|RAPGEF2|PSMD6|PSME3|DAB2IP|KSR2	-43431298067634	52.0	0.0	0.0
0	0	0	0	1	0.0	0.0	0.0	0.0	-597131547165703	GO:0045861	GO Biological Processes	negative regulation of proteolysis	19_GO:0048519 negative regulation of biological process	-597131547165703	4.98436e+16	6.74277e+16	APLP2|APP|CLN3|CSTB|CTSB|CLN8|GLG1|LRP1|SERPINI1|PRKCG|PRNP|PSEN1|RPS6KA3|USP9X	-454340250762736	111.0	0.0	0.0
1	0	0	1	1	-4183048033199910	0.0	0.0	-3147536429674050	-2.09957e+16	GO:0046173	GO Biological Processes	polyol biosynthetic process	19_GO:0008152 metabolic process	-5.96779e+16	6187397708674300	7056600446087940	ABCA2|ASAH1|CYP27A1|GBA1|GCH1|PTS|QDPR|SPR|IP6K1|SPTLC1|SPTSSB	-4337735748482710	94.0	0.0	0.0
1	0	0	0	0	-5959882281865950	0.0	0.0	0.0	0.0	GO:0016093	GO Biological Processes	polyprenol metabolic process	19_GO:0008152 metabolic process	-5959882281865950	1.68772e+16	954125810881632	DPAGT1|ALG6|ALG1|ALG8|SRD5A3|NUS1	-4.53311e+16	42.0	0.0	0.0
0	0	1	0	0	0.0	0.0	-4.52479e+16	0.0	0.0	GO:0006468	GO Biological Processes	protein phosphorylation	19_GO:0008152 metabolic process	-5950497958965330	2024803953272160	5407286149456340	ADAM10|APP|ATM|ATR|BCR|DDR1|CLN3|CSNK2B|PTK2B|MTOR|GSK3B|MAP3K10|NTRK2|PDPK1|PHKB|PIK3R1|PRKCG|PRKDC|EIF2AK2|RELN|RPS6KA3|SPTBN1|CDKL5|TAF1|TBP|THY1|VRK1|PRKRA|TNKS|SQSTM1|BRSK2|MAP3K13|CDC42BPB|ATG13|PIBF1|CAMKK2|COPS8|CIT|MAST1|ERC1|ATP13A2|PIK3R4|MINK1|CAB39|PAK6|CAMK1D|PAK5|CAMKV|PRRT1|TTBK2|DAB2IP|KSR2|SBK1	-4322099296934830	143.0	1.0	1.0
0	0	0	0	1	0.0	0.0	0.0	0.0	-5948284632398260	GO:0007039	GO Biological Processes	protein catabolic process in the vacuole	19_GO:0008152 metabolic process	-5948284632398260	4.59985e+16	1.33296e+16	TPP1|CLN3|LAMP2|VPS13A	-4525038758461450	136.0	0.0	0.0
0	0	0	1	0	0.0	0.0	0.0	-5946852599058590	0.0	R-HSA-1236974	Reactome Gene Sets	ER-Phagosome pathway		-5946852599058590	1033982905982900	8263081595496320	PSMA7|PSMC4|PSMC5|PSMC6|PSMD2|PSMF1|PSMD6|PSME3	-4524174677304740	52.0	0.0	0.0
1	0	0	0	1	-3.31193e+16	0.0	0.0	0.0	-5754971256015180	WP5120	WikiPathways	Inclusion body myositis		-5945231296056770	1.44202e+16	8826614995737850	APP|MAPT|PSEN1|PSEN2|NCSTN|BACE1	-4319307253154130	95.0	0.0	0.0
1	0	0	1	0	-3136801388010260	0.0	0.0	-5932494614008910	0.0	R-HSA-69275	Reactome Gene Sets	G2/M Transition		-5932494614008910	6.52834e+16	7230511166761960	PAFAH1B1|PPP2R2A|PSMA7|PSMC4|PSMC5|PSMC6|PSMD2|PSMF1|PSMD6|PSME3|TUBB4A	-4512332500829170	52.0	0.0	0.0
1	0	0	0	1	-4375550567429970	0.0	0.0	0.0	-5446072496383950	GO:1905039	GO Biological Processes	carboxylic acid transmembrane transport	19_GO:0051179 localization	-5928457781490120	3.63989e+16	6162785524383670	ABCD1|CLN3|CLN8|GFAP|KCNJ10|PSEN1|SLC2A1|SLC6A8|SLC16A2|SLC25A11|SLC6A5|SLC23A2|SLC25A15|ARL6IP5|PRAF2|SLC17A5|SLC38A7|MFSD12|SLC6A19	-4303384055417160	83.0	0.0	0.0
1	0	0	0	0	-5782411204979260	0.0	0.0	0.0	0.0	GO:0006417	GO Biological Processes	regulation of translation	19_GO:0008152 metabolic process	-5927666151252830	2190641749963780	5488252306517600	AARS1|APLP1|APP|CALR|DDX1|EIF4G2|EPRS1|PTK2B|FECH|MTOR|MLH1|NCBP1|PARN|PRKDC|EIF2AK2|DNAJC3|RPS6KA3|ATXN2|WFS1|FXR1|ELP1|EIF2B4|EIF2B2|EIF2B5|NEURL1|PUM1|CTIF|LRPPRC|TRAP1|GCN1|CNOT1|NMNAT2|PUM2|METTL5|EXOSC3|DHX29|PTCD3|SAMD4B|NAT10|ELP2|CELF4|FTO|NHLRC1|PAIP2B	-4303384055417160	104.0	0.0	0.0
0	0	1	0	1	0.0	0.0	-261501020861032	0.0	-5927590350019800	GO:0031345	GO Biological Processes	negative regulation of cell projection organization	19_GO:0048519 negative regulation of biological process	-5927590350019800	652040296342754	7224647446025600	CAPZB|GDI1|PRNP|PSEN1|SLIT1|THY1|UBE3A|SYNGAP1|RAPGEF2|SEMA6B|RTN4	-45079400748273	144.0	1.0	1.0
1	0	0	0	0	-4725169433213510	0.0	0.0	0.0	0.0	R-HSA-8949215	Reactome Gene Sets	Mitochondrial calcium ion transport		-5918106341778250	9195500152021890	7.79586e+16	PHB1|SLC8A3|SPG7|VDAC2|PMPCB|AFG3L2|PMPCA|MICU2	-4298713166034560	145.0	1.0	1.0
0	0	1	0	1	0.0	0.0	-5916779084908160	0.0	-2520544343087250	GO:0097553	GO Biological Processes	calcium ion transmembrane import into cytosol	19_GO:0051179 localization	-5916779084908160	1028707482993190	8233594429336910	CACNA1A|SCN2A|SLC8A2|SLC8A3|CACNA1I|PLCB1|JPH3|JPH4	-4497640045186000	97.0	0.0	0.0
0	1	1	0	0	0.0	-3271727404683720	-5910509194928750	0.0	0.0	GO:0030036	GO Biological Processes	actin cytoskeleton organization	19_GO:0009987 cellular process	-5910509194928750	4299076048329770	644396997000107	ADD2|BCR|DPYSL3|DMTN|PTK2B|SPTB|SPTBN1|BRSK2|IQSEC2|PIP5K1C|TMOD2|FHDC1|PHACTR3|AGAP2|CARMIL2|IQSEC3	-4492900260659810	36.0	0.0	0.0
1	0	0	0	0	-5897061931366550	0.0	0.0	0.0	0.0	GO:0044743	GO Biological Processes	protein transmembrane import into intracellular organelle	19_GO:0051179 localization	-5897061931366550	1.24359e+16	8649406300893000	PEX6|PEX7|PEX10|PEX2|USP9X|AIFM1|DNAJC19	-4480470080658270	37.0	0.0	0.0
1	0	0	1	0	-3102958110755590	0.0	0.0	-5889265050009150	0.0	R-HSA-453274	Reactome Gene Sets	Mitotic G2-G2/M phases		-5889265050009150	6462393162393160	7180861387328510	PAFAH1B1|PPP2R2A|PSMA7|PSMC4|PSMC5|PSMC6|PSMD2|PSMF1|PSMD6|PSME3|TUBB4A	-4474194372421390	52.0	0.0	0.0
1	0	0	0	1	-4348811520106500	0.0	0.0	0.0	-5420274264140000	GO:1903825	GO Biological Processes	organic acid transmembrane transport	19_GO:0051179 localization	-588010365026058	3.6137e+16	6123823289912130	ABCD1|CLN3|CLN8|GFAP|KCNJ10|PSEN1|SLC2A1|SLC6A8|SLC16A2|SLC25A11|SLC6A5|SLC23A2|SLC25A15|ARL6IP5|PRAF2|SLC17A5|SLC38A7|MFSD12|SLC6A19	-4262327960490510	83.0	0.0	0.0
0	0	1	0	0	0.0	0.0	-5876827295521900	0.0	0.0	GO:0099084	GO Biological Processes	postsynaptic specialization organization	19_GO:0009987 cellular process	-5876827295521900	2.57177e+16	1.09417e+16	DLG4|NRXN1|NRXN2|SLITRK3|SHANK3	-4462262493916690	63.0	0.0	0.0
1	0	0	1	0	-3.35348e+16	0.0	0.0	-5873802749948100	0.0	R-HSA-69052	Reactome Gene Sets	Switching of origins to a post-replicative state		-5873802749948100	1011505016722400	8153596936776100	PSMA7|PSMC4|PSMC5|PSMC6|PSMD2|PSMF1|PSMD6|PSME3	-446075205033636	52.0	0.0	0.0
1	1	0	0	1	-3.27253e+16	-3.6561e+16	0.0	0.0	-3102982620496040	GO:0045017	GO Biological Processes	glycerolipid biosynthetic process	19_GO:0008152 metabolic process	-5.86244e+16	2.9638e+16	5.836e+16	ATM|CLN3|DGKB|PIGA|PIK3R1|PIK3R2|PLA2G6|GNPAT|GPAA1|CDS2|SYNJ1|PITPNM1|IP6K1|FIG4|CEPT1|PIP5K1C|PIK3R4|PIGT|VAC14|PIP4K2C|PTDSS2|PITPNM3|PIGO|PIGS|TTC7B	-4246273779932970	41.0	0.0	0.0
1	1	0	0	1	-3.40581e+16	-3.49048e+16	0.0	0.0	-2849231304483900	GO:0031331	GO Biological Processes	positive regulation of cellular catabolic process	19_GO:0048518 positive regulation of biological process	-5848659553195720	2469395988626750	5592142087676640	ABCA2|ABCD1|APP|ATM|MTOR|GRSF1|GSK3B|HTT|MLH1|NRDC|PARN|PSEN1|EPM2A|FXR1|NPRL3|ADAM9|SQSTM1|TMEM59|PUM1|ATG13|SPTLC1|CAMKK2|USP20|WDR45|CNOT1|UFL1|EXOSC3|SAMD4B|VPS13D|SCOC|FTO|PIP4K2C|MTDH|C9orf72	-4234100874297650	31.0	0.0	0.0
1	0	0	0	1	-2338457546908570	0.0	0.0	0.0	-5848604743324290	GO:0006509	GO Biological Processes	membrane protein ectodomain proteolysis	19_GO:0008152 metabolic process	-5848604743324290	2.49992e+16	1.07838e+16	ADAM10|PSEN1|ADAM9|NCSTN|BACE1	-4439066554336500	95.0	0.0	0.0
1	0	0	0	0	-5846147683813150	0.0	0.0	0.0	0.0	GO:0000002	GO Biological Processes	mitochondrial genome maintenance	19_GO:0009987 cellular process	-5846147683813150	1.62021e+16	9324106562134840	PARP1|MPV17|OPA1|LONP1|RRM2B|TWNK	-4.43811e+16	146.0	1.0	1.0
1	0	0	0	0	-5846147683813150	0.0	0.0	0.0	0.0	WP4521	WikiPathways	Glycosylation and related congenital defects		-5846147683813150	1.62021e+16	9324106562134840	DPAGT1|PMM2|ALG6|ALG1|ALG8|SRD5A3	-4.43811e+16	42.0	0.0	0.0
0	0	1	0	1	0.0	0.0	-5839203554040910	0.0	-2001922577868020	GO:0051489	GO Biological Processes	regulation of filopodium assembly	19_GO:0050789 regulation of biological process	-5839203554040910	1694341736694670	9528594899050200	DPYSL3|DMTN|GAP43|PALM|PIK3R1|NEURL1	-4432157021238850	147.0	1.0	1.0
1	0	0	1	0	-5260004730815460	0.0	0.0	-262657850992092	0.0	GO:0006515	GO Biological Processes	protein quality control for misfolded or incompletely synthesized proteins	19_GO:0008152 metabolic process	-5.83581e+16	7675276336566650	7372794395658250	TOR1A|ATXN3|PEX10|VCP|CUL3|LONP1|STUB1|ZER1|UGGT1	-4223650140893460	148.0	1.0	1.0
1	0	0	1	1	-4064288269215240	0.0	0.0	-3.85423e+16	-2612473841275350	GO:0034311	GO Biological Processes	diol metabolic process	19_GO:0008152 metabolic process	-5.83581e+16	7675276336566650	7372794395658250	ABCA2|ASAH1|GBA1|GCH1|PTS|QDPR|SPR|SPTLC1|SPTSSB	-4223650140893460	94.0	0.0	0.0
0	0	1	0	0	0.0	0.0	-5829854654454450	0.0	0.0	GO:0008064	GO Biological Processes	regulation of actin polymerization or depolymerization	19_GO:0050789 regulation of biological process	-5829854654454450	8362396313364050	7684164567971680	ADD2|DMTN|PTK2B|SPTB|SPTBN1|CIT|CYFIP2|TMOD2|CARMIL2	-4424791204924100	36.0	0.0	0.0
1	0	0	1	0	-3.96614e+16	0.0	0.0	-466901488839	0.0	GO:0006086	GO Biological Processes	acetyl-CoA biosynthetic process from pyruvate	19_GO:0008152 metabolic process	-5820192808652660	1.88836e+16	9382400509675990	DLAT|DLD|PDHA1|PDHB|PDHX	-4.21238e+16	35.0	0.0	0.0
1	0	0	0	0	-3.96614e+16	0.0	0.0	0.0	0.0	GO:0050882	GO Biological Processes	voluntary musculoskeletal movement	19_GO:0032501 multicellular organismal process	-5820192808652660	1.88836e+16	9382400509675990	MTOR|ITPR1|MAP1A|XRCC1|VPS35	-4.21238e+16	149.0	1.0	1.0
0	1	1	0	0	0.0	-4.90369e+16	-4946314596406990	0.0	0.0	GO:0098597	GO Biological Processes	observational learning	19_GO:0032501 multicellular organismal process	-5820192808652660	1.88836e+16	9382400509675990	HTT|NF1|NRXN1|NRXN2|SHANK3	-4.21238e+16	63.0	0.0	0.0
1	0	0	1	0	-2.46748e+16	0.0	0.0	-5811932454151410	0.0	WP5220	WikiPathways	Metabolic reprogramming in pancreatic cancer		-5811932454151410	1661758241758240	943137306842529	ACLY|DLAT|GFPT1|GOT2|PDHA1|PDHB	-4408350397127000	35.0	0.0	0.0
1	0	0	0	0	-5.79451e+16	0.0	0.0	0.0	0.0	CORUM:1094	CORUM	Frataxin complex		-5.79451e+16	385765306122449	1.21918e+16	FXN|HSPA9|SDHA|AFG3L2	-4393385110356210	82.0	0.0	0.0
1	0	0	0	0	-5.79451e+16	0.0	0.0	0.0	0.0	GO:0016562	GO Biological Processes	protein import into peroxisome matrix, receptor recycling	19_GO:0051179 localization	-5.79451e+16	385765306122449	1.21918e+16	PEX6|PEX10|PEX2|USP9X	-4393385110356210	37.0	0.0	0.0
0	1	0	1	0	0.0	-2.90179e+16	0.0	-2.4609e+16	0.0	GO:0033157	GO Biological Processes	regulation of intracellular protein transport	19_GO:0051179 localization	-5.79112e+16	2937451437451430	5783662294439490	DMTN|GDI1|GSK3B|HPCA|NF1|PIK3R1|PIK3R2|PRNP|PSEN1|RANGAP1|BAP1|BRSK2|NPEPPS|ATG13|HUWE1|BCAP31|RUFY3|MTCL1|ATP13A2|SAR1B|TMEM30A|VPS11|DMAP1|XPO4|CEP290	-4.18607e+16	68.0	0.0	0.0
1	0	0	0	1	-5790031572007930	0.0	0.0	0.0	-272213782553772	GO:0008202	GO Biological Processes	steroid metabolic process	19_GO:0008152 metabolic process	-5790031572007930	4.21931e+16	6342803017508390	ACAA1|CYP27A1|GBA1|HSD17B4|MECP2|MVK|NPC1|SMPD1|TM7SF2|VLDLR|CYP7B1|NPC2|SCAP|CYB5R1|CLN6|SRD5A3	-4389397226403200	50.0	0.0	0.0
0	1	0	1	0	0.0	-2321830690852630	0.0	-5106563490281400	0.0	R-HSA-5684996	Reactome Gene Sets	MAPK1/MAPK3 signaling		-5787664576491820	2.68068e+16	5662274305845750	ACTB|ARRB1|CALM1|DLG4|DUSP8|GRIN1|NCAM1|NF1|PHB1|PIK3R1|PIK3R2|PSMA7|PSMC4|PSMC5|PSMC6|PSMD1|PSMD2|PSMD3|SPTB|SPTBN1|SPTBN2|CUL3|SYNGAP1|PSMF1|RAPGEF2|PSMD6|PSME3|DAB2IP|KSR2	-418339959417804	52.0	0.0	0.0
0	0	1	0	0	0.0	0.0	-5.06107e+16	0.0	0.0	GO:0099565	GO Biological Processes	chemical synaptic transmission, postsynaptic	19_GO:0032501 multicellular organismal process	-5786051292599820	4980895915678520	6563880731529800	CHRNA4|CHRNB2|GLRA1|GLRB|GRID2|GRIK2|GRIK5|GRIN1|GSK3B|MECP2|MPP2|MAPK8IP2|CELF4	-4183348522337090	119.0	0.0	0.0
1	1	0	1	1	-2286779413457600	-2.4477e+16	0.0	-2.12042e+16	-210008762415312	hsa04140	KEGG Pathway	Autophagy - animal		-5784855377352930	3.56244e+16	6.04697e+16	CTSB|CTSD|MTOR|ITPR1|LAMP1|LAMP2|PDPK1|PIK3R1|PIK3R2|RAB1A|RAB7A|SQSTM1|RUBCN|ATG13|RRAGB|CAMKK2|PIK3R4|ATG2B|C9orf72	-4182931610854050	150.0	1.0	1.0
1	0	0	0	0	-5779856267007140	0.0	0.0	0.0	0.0	GO:1905515	GO Biological Processes	non-motile cilium assembly	19_GO:0009987 cellular process	-5779856267007140	9644132653061220	7939089990094060	KCNJ10|PIBF1|RPGRIP1L|IFT172|TMEM216|MKS1|CC2D2A|ARL13B	-4380688308215590	22.0	0.0	0.0
0	0	0	1	1	0.0	0.0	0.0	-2063153223993570	-3.0601e+16	hsa05030	KEGG Pathway	Cocaine addiction		-5.77443e+16	5934850863422290	6854621958354250	ADCY5|ATF6B|DDC|DLG4|GRIA2|GRIN1|GRM3|PDYN|SLC6A3|TH|PPP1R1B	-41740613557199	86.0	0.0	0.0
1	1	0	1	1	-3.29685e+16	-2.3232e+16	0.0	-2.05083e+16	-5765422019181720	R-HSA-381119	Reactome Gene Sets	Unfolded Protein Response (UPR)		-5765422019181720	9786910444138820	7991415661738530	CALR|TPP1|DNAJC3|SRPRA|SSR1|HSP90B1|GOSR2|SYVN1	-4367715512633810	151.0	1.0	1.0
0	0	1	0	0	0.0	0.0	-5760716353168490	0.0	0.0	GO:0030832	GO Biological Processes	regulation of actin filament length	19_GO:0050789 regulation of biological process	-5760716353168490	8203616636528020	7591234443948600	ADD2|DMTN|PTK2B|SPTB|SPTBN1|CIT|CYFIP2|TMOD2|CARMIL2	-4363981423047940	36.0	0.0	0.0
0	0	0	0	1	0.0	0.0	0.0	0.0	-5758045430953190	GO:0050771	GO Biological Processes	negative regulation of axonogenesis	19_GO:0032502 developmental process	-5758045430953190	1.21966e+16	8528621745789540	GDI1|PSEN1|SLIT1|THY1|SYNGAP1|SEMA6B|RTN4	-4361795475178860	144.0	0.0	0.0
0	1	1	0	0	0.0	-3.87087e+16	-3111980435075480	0.0	0.0	GO:0070507	GO Biological Processes	regulation of microtubule cytoskeleton organization	19_GO:0050789 regulation of biological process	-5754530190176610	341123392736296	5.96733e+16	CLTC|DYNC1H1|GSK3B|MAP1A|MAP1B|MAPT|MECP2|PAFAH1B1|ATXN7|TBCD|CKAP5|APC2|TUBB4A|TPPP|FAM107A|GIT1|CHMP4A|CHMP5|CAMSAP3|TTBK2	-4155708540309220	152.0	1.0	1.0
1	0	0	1	0	-4438782804420020	0.0	0.0	-5751750012032600	0.0	R-HSA-69620	Reactome Gene Sets	Cell Cycle Checkpoints		-5751750012032600	5161092150170640	6664841172669530	PAFAH1B1|PSMA7|PSMC4|PSMC5|PSMC6|PSMD2|RANGAP1|PSMF1|PSMD6|PSME3|YWHAQ|BABAM1|DYNC1LI1	-4357916837575210	52.0	0.0	0.0
0	0	1	0	0	0.0	0.0	-5738795419491090	0.0	0.0	GO:0030834	GO Biological Processes	regulation of actin filament depolymerization	19_GO:0050789 regulation of biological process	-5738795419491090	1.6304e+16	9324399243443440	ADD2|DMTN|SPTB|SPTBN1|TMOD2|CARMIL2	-4346302841675330	36.0	0.0	0.0
1	0	0	0	0	-5738692376636430	0.0	0.0	0.0	0.0	GO:0017004	GO Biological Processes	cytochrome complex assembly	19_GO:0009987 cellular process	-5738692376636430	118140625	8391876793000270	BCS1L|COX10|COX15|SURF1|TTC19|SLC25A46|COX20	-4346302841675330	153.0	1.0	1.0
0	0	1	0	1	0.0	0.0	-3311924712664850	0.0	-4.44199e+16	GO:0010977	GO Biological Processes	negative regulation of neuron projection development	19_GO:0032502 developmental process	-5737946379195880	3.53735e+16	6009058391154840	CRMP1|DAB1|DPYSL3|GDI1|GFAP|MAG|PAFAH1B1|PSEN1|RIT2|SLIT1|THY1|TNR|UBE3A|SYNGAP1|SEMA6B|RUFY3|SPART|RTN4|STX1B	-4139896808610770	144.0	0.0	0.0
1	0	0	0	0	-5737654777074820	0.0	0.0	0.0	0.0	GO:0022010	GO Biological Processes	central nervous system myelination	19_GO:0032502 developmental process	-5737654777074820	1.5579e+16	9119132361581990	ABCA2|KCNJ10|MAG|PLP1|NCSTN|FA2H	-4.34623e+16	28.0	0.0	0.0
1	0	0	0	0	-5737654777074820	0.0	0.0	0.0	0.0	GO:0032291	GO Biological Processes	axon ensheathment in central nervous system	19_GO:0032502 developmental process	-5737654777074820	1.5579e+16	9119132361581990	ABCA2|KCNJ10|MAG|PLP1|NCSTN|FA2H	-4.34623e+16	28.0	0.0	0.0
1	0	0	1	0	-5.73636e+16	0.0	0.0	-4.67199e+16	0.0	GO:0009206	GO Biological Processes	purine ribonucleoside triphosphate biosynthetic process	19_GO:0008152 metabolic process	-5.73636e+16	6959683357879230	7208741653421530	ATP6|NDUFA10|NDUFS1|NDUFS2|NDUFS3|NDUFV1|NDUFS4|NDUFS8|SDHA|NDUFS7	-4345409275512630	18.0	0.0	0.0
1	1	0	0	0	-2.49827e+16	-3458605867515310	0.0	0.0	0.0	GO:0006661	GO Biological Processes	phosphatidylinositol biosynthetic process	19_GO:0008152 metabolic process	-5735695492620880	3.68889e+16	6068143103731260	ATM|PIGA|PIK3R1|PIK3R2|GPAA1|SYNJ1|PITPNM1|IP6K1|FIG4|PIP5K1C|PIK3R4|PIGT|VAC14|PIP4K2C|PITPNM3|PIGO|PIGS|TTC7B	-413918597500387	41.0	0.0	0.0
1	0	0	1	1	-3.15673e+16	0.0	0.0	-3046933925225280	-2.25994e+16	WP4217	WikiPathways	Ebola virus infection in host		-5735695492620880	3.68889e+16	6068143103731260	ACTB|CLTC|CREBBP|CTSB|FOLR1|KPNA1|NPC1|PIK3R1|PIK3R2|EIF2AK2|RFC1|RAB7A|PRKRA|NPC2|VPS41|VPS11|VPS16|DAB2IP	-413918597500387	154.0	1.0	1.0
0	0	0	1	0	0.0	0.0	0.0	-5732957494187060	0.0	R-HSA-8878159	Reactome Gene Sets	Transcriptional regulation by RUNX3		-5732957494187060	9693589743589740	7944376700377350	PSMA7|PSMC4|PSMC5|PSMC6|PSMD2|PSMF1|PSMD6|PSME3	-4342584460556030	52.0	0.0	0.0
1	0	0	0	0	-57321010336714	0.0	0.0	0.0	0.0	GO:0016558	GO Biological Processes	protein import into peroxisome matrix	19_GO:0051179 localization	-57321010336714	2.2503e+16	1.02142e+16	PEX6|PEX7|PEX10|PEX2|USP9X	-4342584460556030	37.0	0.0	0.0
1	0	0	0	0	-57321010336714	0.0	0.0	0.0	0.0	hsa00604	KEGG Pathway	Glycosphingolipid biosynthesis - ganglio series		-57321010336714	2.2503e+16	1.02142e+16	B4GALNT1|GLB1|HEXA|HEXB|SLC33A1	-4342584460556030	49.0	0.0	0.0
0	1	1	0	0	0.0	-257546760300933	-4076065499500730	0.0	0.0	GO:0045927	GO Biological Processes	positive regulation of growth	19_GO:0040007 growth	-5.72682e+16	277743462762918	5673781946289930	ADAM10|CDH4|MEGF8|EIF4G2|PTK2B|FXN|MTOR|GDI1|L1CAM|MAP1B|MAPT|NCBP1|PAFAH1B1|RPS6KA3|SLC6A3|CDKL5|WFS1|MAP3K13|RIMS2|SLC23A2|RUFY3|RIMS1|UNC13A|PLCB1|SYT3|ARX|BRAT1	-4131079383701220	38.0	0.0	0.0
0	1	1	0	1	0.0	-2324392237502460	-3.49439e+16	0.0	-2192217610070000	GO:0051347	GO Biological Processes	positive regulation of transferase activity	19_GO:0065007 biological regulation	-5719667835527810	2.1736e+16	5368078154278390	DDR1|CALM1|DAB1|DKC1|DLG4|DOCK3|EEF1A2|PTK2B|MTOR|MAPT|MAP3K10|MRE11|NTRK2|PARN|PDPK1|PHB1|PRNP|RELN|PSEN1|SLC8A2|TPD52L1|VLDLR|TNKS|ADAM9|NEURL1|MAP3K13|RAPGEF2|RASSF2|STUB1|PIBF1|CAMKK2|PTGES3|COPS8|PNKP|PIK3R4|GPRC5B|CAB39|VAC14|SERINC1|SRCIN1|STRADA|AGAP2|DAB2IP	-412469292898426	139.0	0.0	0.0
1	1	0	1	0	-3995789714432520	-4101404524409270	0.0	-3.79917e+16	0.0	hsa00640	KEGG Pathway	Propanoate metabolism		-5707200998848170	743542395104895	7221731975002350	BCKDHB|DLD|ECHS1|ALDH6A1|MMUT|PCCA|PCCB|SUCLA2|HIBCH	-4112991369122730	73.0	0.0	0.0
1	0	0	1	1	-3439413540853500	0.0	0.0	-3269635926107570	-3.24351e+16	GO:0006575	GO Biological Processes	cellular modified amino acid metabolic process	19_GO:0008152 metabolic process	-5699120423603410	3.84128e+16	6105319256812010	ATIC|CKMT1B|CRAT|CTSB|FOLR1|GART|GCH1|GOT2|MTHFD1|SLC6A8|SLC16A2|ABHD16A|PLOD3|ABHD12|SERINC1|PANK2|PTDSS2	-4106437313839450	155.0	1.0	1.0
1	0	0	1	0	-3043464242332230	0.0	0.0	-5697018138820940	0.0	R-HSA-69481	Reactome Gene Sets	G2/M Checkpoints		-5697018138820940	6.96545e+16	7.19845e+16	PSMA7|PSMC4|PSMC5|PSMC6|PSMD2|PSMF1|PSMD6|PSME3|YWHAQ|BABAM1	-4310924148272370	52.0	0.0	0.0
1	0	0	1	0	-569532824417115	0.0	0.0	-4642965070914630	0.0	GO:0009145	GO Biological Processes	purine nucleoside triphosphate biosynthetic process	19_GO:0008152 metabolic process	-569532824417115	6888666180758010	7159580638457360	ATP6|NDUFA10|NDUFS1|NDUFS2|NDUFS3|NDUFV1|NDUFS4|NDUFS8|SDHA|NDUFS7	-4310795320054800	18.0	0.0	0.0
1	0	0	1	0	-5065114057737270	0.0	0.0	-3.0453e+16	0.0	GO:0006890	GO Biological Processes	retrograde vesicle-mediated transport, Golgi to endoplasmic reticulum	19_GO:0051179 localization	-5681565352911650	5.81615e+16	6757778935277220	COPA|HTT|RAB6A|GBF1|ZW10|COPB2|ATP9A|KIF1C|RER1|NBAS|RINT1	-4091919279873170	10.0	0.0	0.0
1	1	0	1	1	-3.06857e+16	-2.25405e+16	0.0	-3.0453e+16	-5327022439143570	R-HSA-381038	Reactome Gene Sets	XBP1(S) activates chaperone genes		-5681565352911650	5.81615e+16	6757778935277220	ADD1|TPP1|EXTL1|GFPT1|DNAJC3|SRPRA|SSR1|WFS1|ATP6V0D1|GOSR2|SYVN1	-4091919279873170	151.0	0.0	0.0
0	0	1	0	0	0.0	0.0	-5.66935e+16	0.0	0.0	GO:0098698	GO Biological Processes	postsynaptic specialization assembly	19_GO:0032502 developmental process	-5.66935e+16	4114829931972780	1.2564e+16	NRXN1|NRXN2|SLITRK3|SHANK3	-4.28693e+16	63.0	0.0	0.0
0	0	1	0	0	0.0	0.0	-5.66935e+16	0.0	0.0	R-HSA-5682910	Reactome Gene Sets	LGI-ADAM interactions		-5.66935e+16	4114829931972780	1.2564e+16	DLG4|ADAM23|ADAM22|STX1B	-4.28693e+16	156.0	1.0	1.0
0	0	0	1	0	0.0	0.0	0.0	-5665011283912010	0.0	R-HSA-202424	Reactome Gene Sets	Downstream TCR signaling		-5665011283912010	9495761381475660	7844311305407170	PSMA7|PSMC4|PSMC5|PSMC6|PSMD2|PSMF1|PSMD6|PSME3	-4283223114900560	52.0	0.0	0.0
1	0	0	1	0	-3191782547289160	0.0	0.0	-5601628333386880	0.0	CORUM:726	CORUM	DDB2 complex		-5658393060136060	1.32185e+16	8393732947596830	DDB1|GPS1|COPS8|COPS5|COPS7A|COPS4	-4071010907855330	66.0	0.0	0.0
1	0	0	1	0	-3191782547289160	0.0	0.0	-5601628333386880	0.0	CORUM:727	CORUM	CSA complex		-5658393060136060	1.32185e+16	8393732947596830	DDB1|GPS1|COPS8|COPS5|COPS7A|COPS4	-4071010907855330	66.0	0.0	0.0
0	0	0	1	1	0.0	0.0	0.0	-4112103704993860	-3120886760265340	GO:1905897	GO Biological Processes	regulation of response to endoplasmic reticulum stress	19_GO:0050896 response to stimulus	-5645685161635630	4513644891693670	6317040743959640	ATF6B|ATXN3|OPA1|PIK3R1|TMBIM6|WFS1|BCAP31|SERINC3|COPS5|UFL1|UBQLN2|UBQLN1|SYVN1|DAB2IP	-40618877900781	142.0	0.0	0.0
1	0	0	0	1	-2.84742e+16	0.0	0.0	0.0	-4398639826243870	GO:0015748	GO Biological Processes	organophosphate ester transport	19_GO:0051179 localization	-564552277086467	3488223581973580	5934257023594830	ABCA3|ABCD1|SCARB2|MTTP|SLC33A1|PITPNM1|ABCG1|ATP9A|SLC35B1|NPC2|ATP11A|PITPNC1|TMEM30A|ANO3|SLC25A23|PITPNM3|SPNS1|BLTP1|G6PC3	-40618877900781	79.0	0.0	0.0
1	1	0	0	1	-3.29685e+16	-2.3232e+16	0.0	0.0	-2.85392e+16	GO:0006892	GO Biological Processes	post-Golgi vesicle-mediated transport	19_GO:0051179 localization	-5620154594184620	4218680255914290	619693665742897	AP2A1|CLN3|LAMP1|SORT1|SPTBN1|GBF1|AP3D1|SCAMP3|VPS13A|EXOC6B|CCDC22|ANKFY1|VPS13C|EXOC1|VPS35L	-4040647266287270	157.0	1.0	1.0
1	0	0	0	1	-2651189633423660	0.0	0.0	0.0	-4.80861e+16	GO:0050884	GO Biological Processes	neuromuscular process controlling posture	19_GO:0032501 multicellular organismal process	-5619827905647590	1028108003108000	7809502776310330	CLN8|FXN|GCH1|GLRA1|HEXA|MECP2|SCN1A	-4040647266287270	12.0	0.0	0.0
0	0	1	0	0	0.0	0.0	-5193532003966800	0.0	0.0	R-HSA-181429	Reactome Gene Sets	Serotonin Neurotransmitter Release Cycle		-5619827905647590	1028108003108000	7809502776310330	SNAP25|STXBP1|SYN1|PPFIA4|PPFIA3|CPLX1|RIMS1	-4040647266287270	135.0	0.0	0.0
1	0	0	0	0	-5010708990097080	0.0	0.0	0.0	0.0	GO:0034599	GO Biological Processes	cellular response to oxidative stress	19_GO:0050896 response to stimulus	-5616954420789790	2.87359e+16	5655309417855640	PARP1|ATM|ATP2A2|FXN|MAPT|MPV17|PEX10|PEX2|PRDX2|PRKRA|SQSTM1|AIFM1|LONP1|ARL6IP5|CAMKK2|SETX|ATP13A2|PYCR2|TMEM161A|ADPRS|SMPD3|TBC1D24|ERMP1|AGAP3|SIRPA	-4.03851e+16	58.0	0.0	0.0
1	0	0	1	0	-2.23444e+16	0.0	0.0	-4232369357384600	0.0	GO:0051560	GO Biological Processes	mitochondrial calcium ion homeostasis	19_GO:0042592 homeostatic process	-560383178084955	845986013986014	7398430487359180	RAP1GDS1|SLC8A3|BCAP31|AFG3L2|IMMT|SLC25A23|C19orf12|MICU2	-4.02686e+16	145.0	0.0	0.0
0	0	0	0	1	0.0	0.0	0.0	0.0	-5594708286898820	GO:0015914	GO Biological Processes	phospholipid transport	19_GO:0051179 localization	-5594708286898820	9292622037869180	7740501096120070	ABCA3|SCARB2|ABCG1|ATP11A|TMEM30A|ANO3|SPNS1|BLTP1	-4219739944889620	79.0	0.0	0.0
0	1	1	0	1	0.0	-2015089680972640	-2053704691913050	0.0	-3.71809e+16	GO:0036465	GO Biological Processes	synaptic vesicle recycling	19_GO:0051179 localization	-5594594000200230	5200733692536970	6.5116e+16	CANX|DNM1|OPHN1|SH3GL2|SYNJ1|AP3D1|DNAJC6|SNAP91|PIP5K1C|GIT1|TBC1D24|BLTP1	-4019822479744970	134.0	0.0	0.0
0	0	0	1	0	0.0	0.0	0.0	-5591096205417080	0.0	hsa00790	KEGG Pathway	Folate biosynthesis		-5591096205417080	2.23698e+16	1.0151e+16	GCH1|PTS|QDPR|SPR|TH	-4216589142773500	94.0	0.0	0.0
0	1	1	0	1	0.0	-2229990852691850	-4554723771282480	0.0	-2001922577868020	WP4539	WikiPathways	Synaptic signaling pathways associated with autism spectrum disorder		-5591090476163040	570211161387632	6663522074450970	DLG4|MTOR|GRIN1|GSK3B|NF1|NTRK2|PIK3R1|PIK3R2|UBE3A|SYNGAP1|SHANK3	-4017049476455130	80.0	0.0	0.0
0	0	0	0	1	0.0	0.0	0.0	0.0	-5587726554752290	GO:0060012	GO Biological Processes	synaptic transmission, glycinergic	19_GO:0050789 regulation of biological process	-5587726554752290	8624714828897330	1.59693e+16	GLRA1|GLRB|SLC6A5	-4213680282053160	158.0	1.0	1.0
1	0	0	0	0	-3.43595e+16	0.0	0.0	0.0	0.0	GO:0009314	GO Biological Processes	response to radiation	19_GO:0050896 response to stimulus	-5580925123230160	2272869664272370	5345044413260940	PARP1|APP|ATM|ATR|CHRNB2|CREBBP|DDB1|ERCC4|FECH|GRIN1|MECP2|NF1|NPHP1|PIK3R1|PRKDC|SMPD1|ELOVL4|ABCC8|TAF1|TH|UBE2A|XRCC4|CUL4B|SYNGAP1|PITPNM1|PNKP|DDHD2|CRTC1|BACE1|NPTN|BABAM1|RDH11|GPR88|TMEM161A|SLC4A10|PPP1R1B|RNF168|BRAT1	-4008747391682890	70.0	0.0	0.0
0	0	0	1	0	0.0	0.0	0.0	-558069931105931	0.0	R-HSA-5357801	Reactome Gene Sets	Programmed Cell Death		-558069931105931	6007295052365470	682908332170349	OPA1|PSMA7|PSMC4|PSMC5|PSMC6|PSMD2|PSMF1|PSMD6|BCAP31|PSME3|YWHAQ	-4207573154132110	52.0	0.0	0.0
1	0	0	0	0	-5574690702383290	0.0	0.0	0.0	0.0	R-HSA-8949664	Reactome Gene Sets	Processing of SMDT1		-5574690702383290	2109654017857140	9859367143245010	SPG7|PMPCB|AFG3L2|PMPCA|MICU2	-4202482715950110	145.0	0.0	0.0
1	0	0	0	1	-2185936758290300	0.0	0.0	0.0	-5.56675e+16	GO:0006517	GO Biological Processes	protein deglycosylation	19_GO:0008152 metabolic process	-5.56675e+16	2211465340742900	1.0088e+16	AGA|MAN2A2|MAN1B1|UGGT1|SYVN1	-4194998260861470	67.0	0.0	0.0
0	0	0	1	0	0.0	0.0	0.0	-5565993676464220	0.0	R-HSA-5607764	Reactome Gene Sets	CLEC7A (Dectin-1) signaling		-5565993676464220	9213709063214010	7699474587870600	PSMA7|PSMC4|PSMC5|PSMC6|PSMD2|PSMF1|PSMD6|PSME3	-4194701923455060	52.0	0.0	0.0
0	1	1	0	1	0.0	-2.54247e+16	-4357951239841710	0.0	-5.55148e+16	GO:0035725	GO Biological Processes	sodium ion transmembrane transport	19_GO:0051179 localization	-5.55148e+16	7723625219908060	7305799860732050	ATP1A3|SCN1A|SCN2A|SCN8A|SLC6A1|SLC6A5|SLC9A6|SCN3B|SLC4A10	-4182010950658920	47.0	0.0	0.0
0	1	1	1	1	0.0	-3.20883e+16	-5475598519429380	-2663555597984680	-2.09516e+16	GO:0032409	GO Biological Processes	regulation of transporter activity	19_GO:0065007 biological regulation	-5550786719312160	2.51395e+16	5449217049122390	ACTB|ANK2|APP|HCN2|CALM1|CAPN1|DLG4|PTK2B|FGF12|FGF14|HTT|HPCA|PRNP|RELN|ABCC8|PLA2G6|HECW1|MAPK8IP2|UBQLN1|MINK1|CRBN|CAB39|SCN3B|JPH3|CACNG8|THADA|NDFIP1|PRRT1|JPH4|SHANK3|KCTD7	-3.98255e+16	59.0	0.0	0.0
1	1	0	0	0	-554674574012735	-2.03473e+16	0.0	0.0	0.0	GO:0006635	GO Biological Processes	fatty acid beta-oxidation	19_GO:0008152 metabolic process	-554674574012735	9001190476190470	7607015433301530	ACAA1|ACAT1|ABCD1|AUH|ECHS1|HSD17B4|PEX7|PEX2	-4177736149394980	39.0	0.0	0.0
1	0	0	1	0	-2.687e+16	0.0	0.0	-2899642644741640	0.0	GO:0005996	GO Biological Processes	monosaccharide metabolic process	19_GO:0008152 metabolic process	-5543512449867360	3.0937e+16	5709610750490700	DLAT|GLB1|HEXA|HEXB|KCNJ11|LIPA|MAN2A2|MAN2B1|MDH2|PC|PDHA1|PDHB|PMM2|SLC2A1|SLC25A11|SLC23A2|WDTC1|SLC39A14|G6PC3|BRAT1|FOXK1|HECTD4	-3.97599e+16	120.0	0.0	0.0
0	0	1	0	0	0.0	0.0	-5537018334912910	0.0	0.0	GO:0060074	GO Biological Processes	synapse maturation	19_GO:0032502 developmental process	-5537018334912910	3840507936507930	1211657329219600	PALM|SEZ6L|SYBU|IGSF21	-4168463741060200	159.0	1.0	1.0
0	0	0	1	0	0.0	0.0	0.0	-5533729798685490	0.0	R-HSA-5668541	Reactome Gene Sets	TNFR2 non-canonical NF-kB pathway		-5533729798685490	9123378582202110	7652530528579020	PSMA7|PSMC4|PSMC5|PSMC6|PSMD2|PSMF1|PSMD6|PSME3	-4166990440419700	52.0	0.0	0.0
1	0	0	0	0	-5517668835265190	0.0	0.0	0.0	0.0	GO:0043112	GO Biological Processes	receptor metabolic process	19_GO:0008152 metabolic process	-5517668835265190	1098982558139530	8038109733352360	CAPN1|CTSD|PEX6|PEX10|PEX2|USP9X|PIK3R4	-4152285941866550	37.0	0.0	0.0
0	1	1	0	0	0.0	-2983658324802870	-4.14152e+16	0.0	0.0	GO:0048813	GO Biological Processes	dendrite morphogenesis	19_GO:0032502 developmental process	-5516290311855060	5.11685e+16	6433775866719720	RERE|CTNNA2|DLG4|CELSR2|HPRT1|SLC11A2|VLDLR|KLF7|MAPK8IP2|MINK1|KIDINS220|SHANK3	-3.95164e+16	13.0	0.0	0.0
1	0	0	0	0	-4949270637073590	0.0	0.0	0.0	0.0	GO:0021695	GO Biological Processes	cerebellar cortex development	19_GO:0032502 developmental process	-5502902126516550	5.59246e+16	6571729077017760	AARS1|RERE|GBA1|GRID2|OGDH|OPHN1|SPTBN2|FAIM2|KNDC1|SLC25A46|TTBK2	-3.9418e+16	51.0	0.0	0.0
1	1	0	1	1	-2.99035e+16	-2206456836787740	0.0	-2980896291539820	-5225733538782060	R-HSA-381070	Reactome Gene Sets	IRE1alpha activates chaperones		-5502902126516550	5.59246e+16	6571729077017760	ADD1|TPP1|EXTL1|GFPT1|DNAJC3|SRPRA|SSR1|WFS1|ATP6V0D1|GOSR2|SYVN1	-3.9418e+16	151.0	0.0	0.0
1	0	0	1	0	-549742850400727	0.0	0.0	-450277869180756	0.0	GO:0009201	GO Biological Processes	ribonucleoside triphosphate biosynthetic process	19_GO:0008152 metabolic process	-549742850400727	6554264909847430	6.92371e+16	ATP6|NDUFA10|NDUFS1|NDUFS2|NDUFS3|NDUFV1|NDUFS4|NDUFS8|SDHA|NDUFS7	-4135642272837050	18.0	0.0	0.0
0	0	1	0	0	0.0	0.0	-5485915591947070	0.0	0.0	GO:0097116	GO Biological Processes	gephyrin clustering involved in postsynaptic density assembly	19_GO:0051179 localization	-5485915591947070	8641142857142850	1.5971e+16	NRXN1|NRXN2|SLITRK3	-4125470466778970	63.0	0.0	0.0
0	0	1	0	1	0.0	0.0	-2.77341e+16	0.0	-4965078405055940	R-HSA-5576892	Reactome Gene Sets	Phase 0 - rapid depolarisation		-5.46497e+16	6998046071575480	6938296351030170	CALM1|FGF12|FGF14|SCN1A|SCN2A|SCN8A|CACNA2D2|SCN3B|CACNG8	-3906692902630710	47.0	0.0	0.0
0	0	1	0	0	0.0	0.0	-3117702560992600	0.0	0.0	GO:0019228	GO Biological Processes	neuronal action potential	19_GO:0032501 multicellular organismal process	-5.45877e+16	8134480903711670	7215977126214930	MTOR|GLRA1|GRIK2|KCNA2|KCND2|SCN1A|CACNA1I|GPR88	-3.90331e+16	99.0	0.0	0.0
0	0	0	1	0	0.0	0.0	0.0	-5452733029149730	0.0	GO:0000045	GO Biological Processes	autophagosome assembly	19_GO:0008152 metabolic process	-5452733029149730	1.10035e+16	8022985265849510	CTSD|RAB1A|RAB7A|WDR45|STX12|UBQLN2|UBQLN1	-4094513918500870	103.0	0.0	0.0
1	0	0	1	0	-544795858038172	0.0	0.0	-2.19288e+16	0.0	GO:0000959	GO Biological Processes	mitochondrial RNA metabolic process	19_GO:0008152 metabolic process	-544795858038172	1.07401e+16	7927875402919490	LRPPRC|TRNT1|DARS2|TWNK|AARS2|ELAC2|TARS2	-4090183306748400	160.0	1.0	1.0
1	0	1	1	0	-2633994468881370	0.0	-3.66551e+16	-2.38286e+16	0.0	GO:0009306	GO Biological Processes	protein secretion	19_GO:0051179 localization	-5444333768940720	3.68385e+16	5889462975338680	AP1B1|CANX|DMTN|MTTP|PAFAH1B1|PRF1|PTPRN|PTPRN2|SEL1L|RIMS2|CPLX1|COPG1|TANGO6|RAB3C|TANGO2|MIA3|SNX19	-3890263850163430	161.0	1.0	1.0
0	1	0	1	0	0.0	-5443144094592630	0.0	-5207534600637510	0.0	R-HSA-71032	Reactome Gene Sets	Propionyl-CoA catabolism		-5443144094592630	8362396313364050	1570701439691390	MMUT|PCCA|PCCB	-4086697616943120	128.0	0.0	0.0
1	0	0	1	1	-2.93994e+16	0.0	0.0	-4749748034733440	-2.32416e+16	GO:0045862	GO Biological Processes	positive regulation of proteolysis	19_GO:0048518 positive regulation of biological process	-5441494921812660	2.40337e+16	5333431122428520	CTSD|PTK2B|GBA1|GRN|GRIN1|GSK3B|MAPT|ATXN3|NRDC|LGMN|PSEN1|PSMC4|PSMC5|PSMC6|TAF1|VCP|WFS1|USP5|ADAM9|AIFM1|BCAP31|PSME3|STUB1|ZER1|ARL6IP5|NCSTN|CYFIP2|CCDC22|UBQLN2|UBQLN1|CLN6|DAB2IP|TRIM67	-3.88812e+16	46.0	0.0	0.0
0	0	0	1	0	0.0	0.0	0.0	-5439060351248840	0.0	R-HSA-1236975	Reactome Gene Sets	Antigen processing-Cross presentation		-5439060351248840	8862710622710620	7515482133440420	PSMA7|PSMC4|PSMC5|PSMC6|PSMD2|PSMF1|PSMD6|PSME3	-4083055903644520	52.0	0.0	0.0
1	0	0	1	0	-2.30347e+16	0.0	0.0	-5435159826692960	0.0	R-HSA-6807070	Reactome Gene Sets	PTEN Regulation		-5435159826692960	7477912087912080	7153874040410430	PSMA7|PSMC4|PSMC5|PSMC6|PSMD2|PSMF1|PSMD6|PSME3|RRAGB	-40802914420267	52.0	0.0	0.0
0	0	1	0	1	0.0	0.0	-5434972492521940	0.0	-3128363829279320	GO:0007411	GO Biological Processes	axon guidance	19_GO:0040011 locomotion	-5434972492521940	6.5167e+16	6882779799260250	CNTN1|GAP43|L1CAM|TNR|KLF7|NRXN1|SEMA6B|CYFIP2|CNTN4|ARK2C	-40802914420267	89.0	0.0	0.0
0	0	1	0	1	0.0	0.0	-5434972492521940	0.0	-3128363829279320	GO:0097485	GO Biological Processes	neuron projection guidance	19_GO:0040011 locomotion	-5434972492521940	6.5167e+16	6882779799260250	CNTN1|GAP43|L1CAM|TNR|KLF7|NRXN1|SEMA6B|CYFIP2|CNTN4|ARK2C	-40802914420267	89.0	0.0	0.0
0	0	0	0	1	0.0	0.0	0.0	0.0	-3245466565563370	R-HSA-888590	Reactome Gene Sets	GABA synthesis, release, reuptake and degradation		-5434699650611660	973997055576003	7555836778631350	SLC6A1|SNAP25|STXBP1|ALDH5A1|CPLX1|RIMS1|DNAJC5	-388210541687353	135.0	0.0	0.0
1	1	0	0	0	-2120399516847730	-2.69074e+16	0.0	0.0	0.0	GO:0009416	GO Biological Processes	response to light stimulus	19_GO:0050896 response to stimulus	-5.43409e+16	2525834038572890	5388870126279210	PARP1|APP|ATR|CHRNB2|CREBBP|DDB1|ERCC4|FECH|GRIN1|MECP2|NF1|NPHP1|PIK3R1|SMPD1|ELOVL4|ABCC8|TAF1|TH|UBE2A|CUL4B|SYNGAP1|PITPNM1|DDHD2|CRTC1|NPTN|RDH11|GPR88|TMEM161A|SLC4A10|PPP1R1B	-388210541687353	70.0	0.0	0.0
0	1	1	0	1	0.0	-2.59932e+16	-5429588041561120	0.0	-3.00384e+16	GO:1903305	GO Biological Processes	regulation of regulated secretory pathway	19_GO:0051179 localization	-5429588041561120	886271062271062	7512340067747780	BCR|SEPTIN5|STXBP1|RIMS2|RIMS3|SYT3|RIMS4|RAB15	-4075347228794300	25.0	0.0	0.0
0	0	0	1	0	0.0	0.0	0.0	-5422826940702990	0.0	R-HSA-389957	Reactome Gene Sets	Prefoldin mediated transfer of substrate to CCT/TriC		-5422826940702990	2.0772e+16	9746865494834620	ACTB|VBP1|TUBB4A|CCT7|CCT5	-4069465266863710	162.0	1.0	1.0
0	0	1	0	1	0.0	0.0	-2222621662979980	0.0	-4010157614737340	GO:0048488	GO Biological Processes	synaptic vesicle endocytosis	19_GO:0051179 localization	-5416902490921330	5486937590711170	6482285683859180	CANX|DNM1|OPHN1|SH3GL2|SYNJ1|AP3D1|DNAJC6|SNAP91|PIP5K1C|TBC1D24|BLTP1	-3.86837e+16	134.0	0.0	0.0
0	0	1	0	1	0.0	0.0	-4472672756030100	0.0	-5.17671e+16	hsa04961	KEGG Pathway	Endocrine and other factor-regulated calcium reabsorption		-5416902490921330	5486937590711170	6482285683859180	AP2A1|ATP1A3|ATP2B1|ATP2B2|ATP2B3|CLTC|DNM1|PRKCG|SLC8A2|SLC8A3|PLCB1	-3.86837e+16	84.0	0.0	0.0
1	0	0	0	0	-5399042141468890	0.0	0.0	0.0	0.0	GO:0032200	GO Biological Processes	telomere organization	19_GO:0009987 cellular process	-5399042141468890	5712293956043950	6602254880006070	PARP1|ATM|ATR|DKC1|ERCC4|MRE11|PRKDC|RFC1|XRCC1|RUVBL1|CTC1	-4047870560429750	85.0	0.0	0.0
1	0	0	0	0	-5.237e+16	0.0	0.0	0.0	0.0	GO:0000278	GO Biological Processes	mitotic cell cycle	19_GO:0009987 cellular process	-5398235038672760	2033620225927910	5.11768e+16	APP|ATM|CALM1|CLTC|DYNC1H1|HTT|LIPA|MECP2|MRE11|PAFAH1B1|PRKDC|SPTBN1|TBCD|TPD52L1|TUBB2A|UBE2A|VCP|VRK1|NUP214|AAAS|BAP1|CUL4B|CUL3|CUL2|TNKS|CDC23|NAE1|BRSK2|CTDP1|ZW10|CKAP5|TUBB4A|PIBF1|TUBGCP2|CIT|EXOC6B|PLCB1|ZFYVE26|CHMP4A|BABAM1|CHMP5|TTC19|SMPD3|EXOC1|RINT1|ANAPC1|TUBGCP5	-3.85586e+16	163.0	1.0	1.0
1	0	1	1	0	-2.61399e+16	0.0	-3646275715414220	-2367832602778250	0.0	GO:0035592	GO Biological Processes	establishment of protein localization to extracellular region	19_GO:0051179 localization	-5.39513e+16	3653903007561540	5847656609839800	AP1B1|CANX|DMTN|MTTP|PAFAH1B1|PRF1|PTPRN|PTPRN2|SEL1L|RIMS2|CPLX1|COPG1|TANGO6|RAB3C|TANGO2|MIA3|SNX19	-3.85343e+16	161.0	0.0	0.0
0	1	0	1	0	0.0	-2461105256505570	0.0	-3.04934e+16	0.0	GO:0021954	GO Biological Processes	central nervous system neuron development	19_GO:0032502 developmental process	-5391956683922280	430370791998699	6083150400302260	CHRNB2|FOXG1|ARHGAP35|HPRT1|MAPT|NTRK2|OGDH|PAFAH1B1|RAPGEF2|KIFBP|SLC4A10|TCTN1|SPG11|ARX	-3.85093e+16	121.0	0.0	0.0
0	1	1	0	0	0.0	-2015089680972640	-5375279656499790	0.0	0.0	GO:0098900	GO Biological Processes	regulation of action potential	19_GO:0050789 regulation of biological process	-5375279656499790	1.41658e+16	8606899377143670	ANK2|HCN2|CHRNB2|FGF12|SLC8A2|CTNNA3	-4026505122679640	138.0	0.0	0.0
0	0	1	0	0	0.0	0.0	-5375063088116100	0.0	0.0	GO:0051693	GO Biological Processes	actin filament capping	19_GO:0048519 negative regulation of biological process	-5375063088116100	2.05741e+16	9688671830991360	ADD2|DMTN|SPTB|SPTBN1|TMOD2	-4026505122679640	36.0	0.0	0.0
0	0	1	0	1	0.0	0.0	-5375063088116100	0.0	-2.46039e+16	GO:0051968	GO Biological Processes	positive regulation of synaptic transmission, glutamatergic	19_GO:0048518 positive regulation of biological process	-5375063088116100	2.05741e+16	9688671830991360	PTK2B|STXBP1|TNR|NRXN1|SHANK3	-4026505122679640	63.0	0.0	0.0
1	0	0	1	0	-535952236201401	0.0	0.0	-3.09565e+16	0.0	R-HSA-5696399	Reactome Gene Sets	Global Genome Nucleotide Excision Repair (GG-NER)		-535952236201401	7.2331e+16	7014560935837690	PARP1|DDB1|ERCC4|GPS1|RFC1|XRCC1|CUL4B|RUVBL1|COPS5	-4.0127e+16	164.0	1.0	1.0
1	0	0	1	1	-2.98629e+16	0.0	0.0	-3.72009e+16	-2.15143e+16	GO:0046434	GO Biological Processes	organophosphate catabolic process	19_GO:0008152 metabolic process	-5355793564961210	3473482721657900	5753264964220440	ACAT1|ABCD1|FHIT|HPRT1|PNP|SMPD1|VCP|ABHD16A|PLA2G6|SUCLA2|PDE10A|PNPLA6|PLCB1|ABHD12|SMPD3|ABHD6|FITM2|PLBD2	-3.81814e+16	165.0	1.0	1.0
0	0	0	1	1	0.0	0.0	0.0	-5355579929459160	-2.0255e+16	hsa05110	KEGG Pathway	Vibrio cholerae infection		-5355579929459160	1395876923076920	853970280764022	ACTB|ATP6V1A|ATP6AP1|ATP6V0D1|ATP6V1D|ATP6V1H	-4009619944742610	93.0	0.0	0.0
1	0	0	0	0	-5347982847805330	0.0	0.0	0.0	0.0	GO:0008535	GO Biological Processes	respiratory chain complex IV assembly	19_GO:0009987 cellular process	-5347982847805330	1.35018e+16	8400420469149770	BCS1L|COX10|COX15|SURF1|SLC25A46|COX20	-4004605394872650	153.0	0.0	0.0
1	0	0	0	0	-5347982847805330	0.0	0.0	0.0	0.0	GO:0016226	GO Biological Processes	iron-sulfur cluster assembly	19_GO:0008152 metabolic process	-5347982847805330	1.35018e+16	8400420469149770	ABCB7|FXN|HSPA9|NFS1|MMS19|NUBPL	-4004605394872650	82.0	0.0	0.0
1	0	0	0	0	-5347982847805330	0.0	0.0	0.0	0.0	GO:0031163	GO Biological Processes	metallo-sulfur cluster assembly	19_GO:0009987 cellular process	-5347982847805330	1.35018e+16	8400420469149770	ABCB7|FXN|HSPA9|NFS1|MMS19|NUBPL	-4004605394872650	82.0	0.0	0.0
1	1	0	0	0	-534723947157279	-2.12594e+16	0.0	0.0	0.0	R-HSA-72306	Reactome Gene Sets	tRNA processing		-534723947157279	6309245660881170	6746012778378570	DDX1|EPRS1|SEC13|AAAS|TRNT1|DUS2|NUP133|ELAC2|THADA|TSEN54	-4004290951496610	166.0	1.0	1.0
1	0	0	1	0	-4209276936748270	0.0	0.0	-5343690357934500	0.0	GO:0006084	GO Biological Processes	acetyl-CoA metabolic process	19_GO:0008152 metabolic process	-5343690357934500	2.00557e+16	9560200426696360	ACAT1|ACLY|DLAT|PDHA1|PDHB	-4001598434747280	35.0	0.0	0.0
0	0	0	1	0	0.0	0.0	0.0	-5343690357934500	0.0	GO:0042417	GO Biological Processes	dopamine metabolic process	19_GO:0008152 metabolic process	-5343690357934500	2.00557e+16	9560200426696360	DDC|GCH1|HPRT1|SLC6A3|TH	-4001598434747280	86.0	0.0	0.0
1	1	1	0	0	-2128182573967240	-3.09722e+16	-2.38159e+16	0.0	0.0	GO:0046488	GO Biological Processes	phosphatidylinositol metabolic process	19_GO:0008152 metabolic process	-5335976213280640	3326517853007910	5682521310401440	ATM|PIGA|PIK3R1|PIK3R2|GPAA1|SYNJ1|PITPNM1|IP6K1|FIG4|PLCB1|PIP5K1C|PIK3R4|PIGT|VAC14|PIP4K2C|PITPNM3|PIGO|PIGS|TTC7B	-3.801e+16	41.0	0.0	0.0
0	1	0	0	1	0.0	-2.16087e+16	0.0	0.0	-2.90088e+16	GO:0007632	GO Biological Processes	visual behavior	19_GO:0032501 multicellular organismal process	-5332999913687390	5385327635327630	6395085005958240	APP|CHRNB2|GRIN1|MECP2|NF1|NPHP1|ABCC8|SYNGAP1|DDHD2|NPTN|PPP1R1B	-3.79936e+16	70.0	0.0	0.0
1	0	1	0	0	-2.07664e+16	0.0	-3.2641e+16	0.0	0.0	GO:0120009	GO Biological Processes	intermembrane lipid transfer	19_GO:0051179 localization	-5332999913687390	5385327635327630	6395085005958240	ABCA3|MTTP|TTPA|PITPNM1|ABCG1|NPC2|PITPNC1|ATG2B|GRAMD1B|PITPNM3|BLTP1	-3.79936e+16	79.0	0.0	0.0
0	0	0	0	1	0.0	0.0	0.0	0.0	-2.78796e+16	GO:0001964	GO Biological Processes	startle response	19_GO:0032501 multicellular organismal process	-5320801978002730	7833203833203830	7043029996914940	CTNNA2|GLRA1|GLRB|GRID2|MECP2|SLC6A3|BACE1|CSMD1	-3787821760890540	158.0	0.0	0.0
0	0	1	0	0	0.0	0.0	-5300309478198120	0.0	0.0	R-HSA-264642	Reactome Gene Sets	Acetylcholine Neurotransmitter Release Cycle		-5300309478198120	3388683473389350	1.13413e+16	STXBP1|PPFIA4|PPFIA3|CPLX1	-3.96205e+16	135.0	0.0	0.0
0	0	1	0	0	0.0	0.0	-3720047759317800	0.0	0.0	GO:0032272	GO Biological Processes	negative regulation of protein polymerization	19_GO:0048519 negative regulation of biological process	-5295631907611590	4.52213e+16	6095618383086560	ADD1|ADD2|CAPZB|DMTN|FLII|SPTB|SPTBN1|SPTBN2|TBCD|VDAC2|TUBB4A|ARFGEF1|TMOD2	-3.76398e+16	36.0	0.0	0.0
1	0	0	0	0	-52924677863758	0.0	0.0	0.0	0.0	GO:0033044	GO Biological Processes	regulation of chromosome organization	19_GO:0050789 regulation of biological process	-52924677863758	4083201324884790	5978173441150120	PARP1|ATM|ATR|DKC1|ERCC4|MRE11|PARN|XRCC1|RUVBL1|CDC23|ZW10|PNKP|NAT10|ANAPC1|CTC1	-3.95675e+16	118.0	0.0	0.0
0	0	1	0	0	0.0	0.0	-5283957838842620	0.0	0.0	GO:0030833	GO Biological Processes	regulation of actin filament polymerization	19_GO:0050789 regulation of biological process	-5283957838842620	8471708683473380	7302371528388960	ADD2|DMTN|PTK2B|SPTB|SPTBN1|CYFIP2|TMOD2|CARMIL2	-3949079570697350	36.0	0.0	0.0
0	0	0	1	0	0.0	0.0	0.0	-319213205349135	0.0	GO:0008090	GO Biological Processes	retrograde axonal transport	19_GO:0051179 localization	-5.26205e+16	9252972027972020	7320291125649020	KIF1A|DYNC1H1|KIF5A|MAP1A|PAFAH1B1|KIF1C|ACTR10	-3732376471882340	55.0	0.0	0.0
1	0	0	0	1	-3.46836e+16	0.0	0.0	0.0	-2.79915e+16	GO:0009725	GO Biological Processes	response to hormone	19_GO:0050896 response to stimulus	-5259960621557160	1.87878e+16	4956023831172	ABCA2|ABCA3|ACAT1|PARP1|ATP1A3|ATP2B1|BCKDHB|CALR|CSNK2B|CTSB|EIF2B1|EPRS1|PTK2B|MTOR|GBA1|GLB1|GSK3B|LTA4H|MAP1B|NPC1|OTC|PDPK1|PHB1|PIK3R1|PIK3R2|PRKDC|QDPR|RANGAP1|RAP1GDS1|SORT1|SLC2A1|ABCC8|TH|NKX2-1|UBE3A|YWHAG|ADAM9|EIF2B4|EIF2B3|EIF2B2|EIF2B5|AIFM1|LONP1|CYP7B1|PTGES3|SLC27A4|FAM107A|SCAP|WDTC1|PLCB1|SLC39A14|CAB39|VPS13C|SLC30A10|ARID1B|MMS19	-3.73095e+16	100.0	0.0	0.0
0	0	1	0	1	0.0	0.0	-2177834997469760	0.0	-3.93271e+16	GO:0140238	GO Biological Processes	presynaptic endocytosis	19_GO:0051179 localization	-5251108387921620	5287412587412580	6310026921812710	CANX|DNM1|OPHN1|SH3GL2|SYNJ1|AP3D1|DNAJC6|SNAP91|PIP5K1C|TBC1D24|BLTP1	-3.72341e+16	134.0	0.0	0.0
1	0	0	0	1	-3744597120787800	0.0	0.0	0.0	-357760525739912	GO:0014002	GO Biological Processes	astrocyte development	19_GO:0032502 developmental process	-5240516015257380	6609265734265730	6676905527405320	APP|GFAP|GRN|LRP1|MAPT|NF1|PLP1|PSEN1|EIF2B5	-3714126129188940	101.0	0.0	0.0
0	0	0	1	0	0.0	0.0	0.0	-522968710065035	0.0	R-HSA-983705	Reactome Gene Sets	Signaling by the B Cell Receptor (BCR)		-522968710065035	830879120879121	7215973200097610	PSMA7|PSMC4|PSMC5|PSMC6|PSMD2|PSMF1|PSMD6|PSME3	-3899413443640420	52.0	0.0	0.0
1	0	0	0	1	-4261584886889120	0.0	0.0	0.0	-2578436887428680	GO:0048708	GO Biological Processes	astrocyte differentiation	19_GO:0032502 developmental process	-5218990650721570	4806738715829620	6138450558080570	APP|DAB1|GAP43|GFAP|GRN|LRP1|MAPT|NF1|PLP1|PSEN1|CUL4B|EIF2B5	-3.69586e+16	101.0	0.0	0.0
0	0	1	0	1	0.0	0.0	-4011063063058690	0.0	-2578436887428680	GO:0048814	GO Biological Processes	regulation of dendrite morphogenesis	19_GO:0032502 developmental process	-5218990650721570	4806738715829620	6138450558080570	CHRNB2|DLG4|GSK3B|PAFAH1B1|RELN|PTPRD|CDKL5|RAPGEF2|HECW1|CUX2|TBC1D24|KNDC1	-3.69586e+16	124.0	0.0	0.0
0	0	0	1	0	0.0	0.0	0.0	-521371639598993	0.0	R-HSA-453279	Reactome Gene Sets	Mitotic G1 phase and G1/S transition		-521371639598993	7026226122870410	6866662596429920	PPP2R2A|PSMA7|PSMC4|PSMC5|PSMC6|PSMD2|PSMF1|PSMD6|PSME3	-3.88635e+16	52.0	0.0	0.0
1	1	0	0	0	-4268168795153830	-4346231820682620	0.0	0.0	0.0	R-HSA-3371556	Reactome Gene Sets	Cellular response to heat stress		-5211906021713970	4158639113695290	591690093897818	ATM|ATR|CREBBP|MTOR|GSK3B|HSPA9|SEC13|VCP|NUP214|AAAS|NUP155|POM121|PTGES3|NUP133	-3690070576446510	167.0	1.0	1.0
0	0	0	1	0	0.0	0.0	0.0	-3082296638534960	0.0	GO:0098876	GO Biological Processes	vesicle-mediated transport to the plasma membrane	19_GO:0051179 localization	-5203788670267400	3538819448268260	568468984871239	ATP6AP1|SNAP25|SPTBN1|RAB7A|CLSTN1|EXOC6B|STX12|PTPN23|NSG1|CCDC22|VPS35|EXOC1|VPS35L|DENND1A|BLTP1|STX1B|VPS13B	-3683245769054920	168.0	1.0	1.0
0	0	1	0	0	0.0	0.0	-5199912771109580	0.0	0.0	GO:0032956	GO Biological Processes	regulation of actin cytoskeleton organization	19_GO:0050789 regulation of biological process	-5199912771109580	4980485796624120	6235948274029750	ADD2|CTNNA2|DMTN|PTK2B|PIK3R1|SPTB|SPTBN1|CIT|CYFIP2|TMOD2|SHANK3|CARMIL2	-3.87345e+16	36.0	0.0	0.0
0	0	0	1	1	0.0	0.0	0.0	-5194219440971640	-3.83512e+16	GO:0072583	GO Biological Processes	clathrin-dependent endocytosis	19_GO:0051179 localization	-5194219440971640	1876178660049620	9213505376269260	AP2A1|CANX|CLTC|DNAJC6|LMBRD1	-3869898734544970	112.0	0.0	0.0
0	0	0	1	1	0.0	0.0	0.0	-5194219440971640	-2612473841275350	R-HSA-917977	Reactome Gene Sets	Transferrin endocytosis and recycling		-5194219440971640	1876178660049620	9213505376269260	ATP6V1A|ATP6AP1|ATP6V0D1|ATP6V1D|ATP6V1H	-3869898734544970	93.0	0.0	0.0
0	0	1	0	0	0.0	0.0	-5193532003966800	0.0	0.0	R-HSA-181430	Reactome Gene Sets	Norepinephrine Neurotransmitter Release Cycle		-5193532003966800	320042328042328	1.10023e+16	STXBP1|PPFIA4|PPFIA3|CPLX1	-3869898734544970	135.0	0.0	0.0
0	1	1	0	0	0.0	-2.59281e+16	-5193150834716660	0.0	0.0	GO:0051899	GO Biological Processes	membrane depolarization	19_GO:0065007 biological regulation	-5193150834716660	1.89499e+16	9258105046114590	ANK2|HCN2|CHRNA4|CHRNB2|SCN3B	-3869898734544970	138.0	0.0	0.0
0	0	1	0	1	0.0	0.0	-5193150834716660	0.0	-3485532657225890	GO:0098703	GO Biological Processes	calcium ion import across plasma membrane	19_GO:0051179 localization	-5193150834716660	1.89499e+16	9258105046114590	CACNA1A|SCN2A|SLC8A2|SLC8A3|CACNA1I	-3869898734544970	97.0	0.0	0.0
0	0	0	0	1	0.0	0.0	0.0	0.0	-5192594886219140	GO:0051208	GO Biological Processes	sequestering of calcium ion	19_GO:0042592 homeostatic process	-5192594886219140	6899771863117870	1424173444417400	CALR|PSEN1|HSP90B1	-3.86975e+16	110.0	0.0	0.0
0	0	1	0	1	0.0	0.0	-4.39167e+16	0.0	-2741522372618580	GO:0001941	GO Biological Processes	postsynaptic membrane organization	19_GO:0009987 cellular process	-5189304475235650	7553446553446550	6878745538262890	CDH2|DLG4|GLRB|RELN|NRXN1|NRXN2|RER1|SHANK3	-3.67005e+16	63.0	0.0	0.0
0	0	1	0	0	0.0	0.0	-5187119477545390	0.0	0.0	GO:0042297	GO Biological Processes	vocal learning	19_GO:0032501 multicellular organismal process	-5187119477545390	720095238095238	1.45456e+16	NRXN1|NRXN2|SHANK3	-3.8655e+16	63.0	0.0	0.0
0	0	1	0	0	0.0	0.0	-5187119477545390	0.0	0.0	GO:0098596	GO Biological Processes	imitative learning	19_GO:0032501 multicellular organismal process	-5187119477545390	720095238095238	1.45456e+16	NRXN1|NRXN2|SHANK3	-3.8655e+16	63.0	0.0	0.0
0	1	0	0	0	0.0	-5180129675193420	0.0	0.0	0.0	hsa04070	KEGG Pathway	Phosphatidylinositol signaling system		-5180129675193420	1.00579e+16	7595843164592700	CALM1|DGKB|PIK3R2|CDS2|IP6K1|PIP5K1C|PIP4K2C	-3.85933e+16	169.0	1.0	1.0
0	0	0	0	1	0.0	0.0	0.0	0.0	-5.17671e+16	WP3286	WikiPathways	Copper homeostasis		-5.17671e+16	1.30184e+16	8201899548101950	ADAM10|APP|SLC11A2|PRNP|ADAM9|BACE1	-3856725308072730	170.0	1.0	1.0
0	0	0	1	0	0.0	0.0	0.0	-5174742005122330	0.0	R-HSA-195721	Reactome Gene Sets	Signaling by WNT		-5174742005122330	4568580060422960	6079022908851410	AP2A1|CLTC|GNAO1|PSMA7|PSMC4|PSMC5|PSMC6|PSMD2|CUL3|PSMF1|PSMD6|PSME3|VPS35	-385516174489466	52.0	0.0	0.0
1	1	0	1	0	-2014187076533100	-4.01013e+16	0.0	-2124174203704120	0.0	GO:0032388	GO Biological Processes	positive regulation of intracellular transport	19_GO:0051179 localization	-5174593536843110	2.93745e+16	5.42312e+16	DYNC1H1|GSK3B|HPCA|PIK3R1|PIK3R2|PRNP|PSEN1|BAP1|NPEPPS|ATG13|HUWE1|BCAP31|RUFY3|MLC1|MTCL1|PTPN23|SAR1B|TMEM30A|VPS11|DMAP1|XPO4|CEP290	-3656624240091800	68.0	0.0	0.0
0	0	0	1	0	0.0	0.0	0.0	-5.17224e+16	0.0	R-HSA-157118	Reactome Gene Sets	Signaling by NOTCH		-5.17224e+16	5444909983633380	6369795119384350	PSMA7|PSMC4|PSMC5|PSMC6|PSMD2|RAB6A|PSMF1|PSMD6|PSME3|NCSTN|DNER	-385306396890707	52.0	0.0	0.0
0	1	1	0	0	0.0	-3150612780753170	-4355795528520710	0.0	0.0	GO:0043550	GO Biological Processes	regulation of lipid kinase activity	19_GO:0008152 metabolic process	-5171147098916150	5.19299e+16	6227017534099450	EEF1A2|PTK2B|MAPT|PIK3R1|PIK3R2|RUBCN|PIK3R4|PIP4K2C|AGAP2|WDR81|DAB2IP	-3654458907760190	171.0	1.0	1.0
0	0	0	0	1	0.0	0.0	0.0	0.0	-5.17005e+16	GO:0006884	GO Biological Processes	cell volume homeostasis	19_GO:0042592 homeostatic process	-5.17005e+16	1.85478e+16	915531310538002	CLCN6|CLN3|SLC12A6|SLC12A9|SLC12A5	-3851570813860290	172.0	1.0	1.0
0	0	0	1	0	0.0	0.0	0.0	-5169933993939990	0.0	GO:1904294	GO Biological Processes	positive regulation of ERAD pathway	19_GO:0048518 positive regulation of biological process	-5169933993939990	3101948717948710	1082907427022770	ATXN3|BCAP31|UBQLN2|UBQLN1	-3851570813860290	142.0	0.0	0.0
0	0	1	0	1	0.0	0.0	-2395637217163180	0.0	-4309515822671870	GO:1990090	GO Biological Processes	cellular response to nerve growth factor stimulus	19_GO:0050896 response to stimulus	-5168029892510610	5747187595013680	6388592275385990	PARP1|APP|RAPGEF1|MAPT|NTRK2|SORT1|SH3GL2|UBE3A|RAPGEF2|KIDINS220	-3.65326e+16	173.0	1.0	1.0
1	0	0	0	0	-5150637234106150	0.0	0.0	0.0	0.0	GO:0007224	GO Biological Processes	smoothened signaling pathway	19_GO:0050896 response to stimulus	-5150637234106150	68267455858748	6750156651859520	KIAA0586|TCTN3|IFT172|MKS1|CC2D2A|TMEM231|TCTN2|TTBK2|ARL13B	-3.83389e+16	22.0	0.0	0.0
0	0	1	0	0	0.0	0.0	-4332819271957250	0.0	0.0	GO:0018105	GO Biological Processes	peptidyl-serine phosphorylation	19_GO:0008152 metabolic process	-5149853969888520	3.01727e+16	5441995227300950	ATM|ATR|MTOR|GSK3B|MAP3K10|NTRK2|PDPK1|PRKCG|PRKDC|RPS6KA3|TAF1|VRK1|TNKS|BRSK2|MAP3K13|MAST1|CAB39|CAMK1D|CAMKV|TTBK2|SBK1	-3636352106172180	143.0	0.0	0.0
0	0	1	0	0	0.0	0.0	-5136014436208360	0.0	0.0	GO:0030835	GO Biological Processes	negative regulation of actin filament depolymerization	19_GO:0048519 negative regulation of biological process	-5136014436208360	1.8464e+16	9125393779724660	ADD2|DMTN|SPTB|SPTBN1|TMOD2	-3820880226258850	36.0	0.0	0.0
0	0	0	0	1	0.0	0.0	0.0	0.0	-4779385019284880	GO:0048854	GO Biological Processes	brain morphogenesis	19_GO:0032502 developmental process	-5134255649481440	643063693063693	6553552537854900	CDH2|CTNNA2|GBA1|NF1|PAFAH1B1|PSEN1|SLIT1|SLC4A10|SHANK3	-3622021799751740	48.0	0.0	0.0
1	1	0	0	0	-2.05416e+16	-3023734111810490	0.0	0.0	0.0	GO:0090316	GO Biological Processes	positive regulation of intracellular protein transport	19_GO:0051179 localization	-5.12728e+16	3219898691052530	5511600699119230	GSK3B|HPCA|PIK3R1|PIK3R2|PRNP|PSEN1|BAP1|NPEPPS|ATG13|HUWE1|BCAP31|RUFY3|MTCL1|SAR1B|TMEM30A|VPS11|DMAP1|XPO4|CEP290	-3.61568e+16	68.0	0.0	0.0
1	0	0	1	0	-3995789714432520	0.0	0.0	-5123481726282740	0.0	GO:0042558	GO Biological Processes	pteridine-containing compound metabolic process	19_GO:0008152 metabolic process	-5123481726282740	1817548076923070	905208196500294	ATIC|GCH1|PTS|QDPR|SPR	-3809953043048650	94.0	0.0	0.0
0	0	0	1	0	0.0	0.0	0.0	-5123481726282740	0.0	R-HSA-389958	Reactome Gene Sets	Cooperation of Prefoldin and TriC/CCT in actin and tubulin folding		-5123481726282740	1817548076923070	905208196500294	ACTB|VBP1|TUBB4A|CCT7|CCT5	-3809953043048650	162.0	0.0	0.0
0	0	0	1	0	0.0	0.0	0.0	-3289407356374840	0.0	GO:0048259	GO Biological Processes	regulation of receptor-mediated endocytosis	19_GO:0051179 localization	-510338569866763	3.64649e+16	5.66231e+16	ABCA2|ARRB1|DLG4|HPCA|OPHN1|PPT1|ATXN2|SYNJ1|TBC1D5|DNAJC6|SNAP91|UBQLN2|AHI1|VAC14|SMAP1|LRRTM1	-3.59305e+16	32.0	0.0	0.0
0	0	1	0	0	0.0	0.0	-5100772739202090	0.0	0.0	GO:0010469	GO Biological Processes	regulation of signaling receptor activity	19_GO:0050896 response to stimulus	-5100772739202090	80010582010582	7041694510554860	DLG4|PTK2B|NEURL1|NRXN2|DLGAP4|MAPK8IP2|DLGAP3|SHANK3	-3790908760446510	43.0	0.0	0.0
0	0	1	0	0	0.0	0.0	-5100406956257820	0.0	0.0	R-HSA-1296071	Reactome Gene Sets	Potassium Channels		-5100406956257820	9787702265372160	7470172180053330	HCN2|KCND1|KCND2|KCNJ11|KCNQ2|KCNQ3|ABCC8	-3790908760446510	127.0	0.0	0.0
1	0	0	1	0	-5100052606706830	0.0	0.0	-4220164738628240	0.0	GO:0009142	GO Biological Processes	nucleoside triphosphate biosynthetic process	19_GO:0008152 metabolic process	-5100052606706830	5921835839598990	6455835313564140	ATP6|NDUFA10|NDUFS1|NDUFS2|NDUFS3|NDUFV1|NDUFS4|NDUFS8|SDHA|NDUFS7	-3790908760446510	18.0	0.0	0.0
0	0	0	0	1	0.0	0.0	0.0	0.0	-5099348376287230	WP3995	WikiPathways	Prion disease pathway		-5099348376287230	1796815589353610	8994709642646470	CHD2|PDIA3|NCAM1|PRNP|HSP90B1	-3.7906e+16	174.0	1.0	1.0
0	0	1	0	0	0.0	0.0	-5093236170165330	0.0	0.0	GO:0071625	GO Biological Processes	vocalization behavior	19_GO:0032501 multicellular organismal process	-5093236170165330	3.03198e+16	1.06898e+16	DLG4|NRXN1|NRXN2|SHANK3	-3.78528e+16	63.0	0.0	0.0
0	1	0	1	1	0.0	-2.09593e+16	0.0	-2831374542081370	-4990491854856510	R-HSA-936837	Reactome Gene Sets	Ion transport by P-type ATPases		-5093040012701320	5101889338731440	6145968678818610	ATP1A3|ATP2A2|ATP2B1|ATP2B2|ATP2B3|ATP7B|CALM1|ATP9A|ATP11A|ATP13A2|ATP2C1	-3.58396e+16	84.0	0.0	0.0
0	1	1	0	0	0.0	-2396955561648940	-4.29322e+16	0.0	0.0	GO:0033674	GO Biological Processes	positive regulation of kinase activity	19_GO:0048518 positive regulation of biological process	-5087575248356080	2218494791921360	503980657735774	DDR1|CALM1|DAB1|DLG4|DOCK3|EEF1A2|PTK2B|MTOR|MAPT|MAP3K10|MRE11|NTRK2|PDPK1|PHB1|PRNP|RELN|PSEN1|SLC8A2|TPD52L1|VLDLR|ADAM9|NEURL1|MAP3K13|RAPGEF2|RASSF2|PIBF1|CAMKK2|COPS8|PIK3R4|GPRC5B|CAB39|VAC14|SRCIN1|STRADA|AGAP2|DAB2IP	-3579750517531430	139.0	0.0	0.0
0	1	1	0	0	0.0	-5084343952841900	-431618354120469	0.0	0.0	R-HSA-9013149	Reactome Gene Sets	RAC1 GTPase cycle		-5084343952841900	6780321335160040	6704044860150160	DOCK3|ARHGAP35|PIK3R2|SRGAP3|NISCH|DOCK9|CYFIP2|GIT1|ARHGAP33	-3.77678e+16	175.0	1.0	1.0
1	0	1	1	0	-2290266461387280	0.0	-2.3692e+16	-2.11317e+16	0.0	M87	Canonical Pathways	PID LKB1 PATHWAY		-5079039580107570	5.62491e+16	6.29142e+16	CTSD|MTOR|GSK3B|MAPT|PSEN2|YWHAG|BRSK2|YWHAQ|CAB39|STRADA	-3.57496e+16	176.0	1.0	1.0
0	0	0	1	1	0.0	0.0	0.0	-428734107943631	-2.09957e+16	R-HSA-437239	Reactome Gene Sets	Recycling pathway of L1		-5079039580107570	5.62491e+16	6.29142e+16	ACTB|AP2A1|CLTC|DNM1|DPYSL2|L1CAM|RPS6KA3|SH3GL2|TUBB2A|TUBB4A	-3.57496e+16	56.0	0.0	0.0
1	1	0	0	0	-4663489693608860	-3.35894e+16	0.0	0.0	0.0	GO:0006913	GO Biological Processes	nucleocytoplasmic transport	19_GO:0051179 localization	-5065981340022480	2.67582e+16	524342273259017	CALR|CSE1L|HSPA9|KPNA1|NCBP1|NF1|PIK3R1|RANGAP1|ATXN1|SEC13|NUP214|AAAS|SQSTM1|NUP155|POM121|TNPO2|IPO11|SDAD1|DDX19A|NUP133|XPO5|XPO4|SPG11|STRADA|POM121C	-3.565e+16	88.0	0.0	0.0
1	1	0	0	0	-4663489693608860	-3.35894e+16	0.0	0.0	0.0	GO:0051169	GO Biological Processes	nuclear transport	19_GO:0051179 localization	-5065981340022480	2.67582e+16	524342273259017	CALR|CSE1L|HSPA9|KPNA1|NCBP1|NF1|PIK3R1|RANGAP1|ATXN1|SEC13|NUP214|AAAS|SQSTM1|NUP155|POM121|TNPO2|IPO11|SDAD1|DDX19A|NUP133|XPO5|XPO4|SPG11|STRADA|POM121C	-3.565e+16	88.0	0.0	0.0
1	0	0	0	1	-3075054088833600	0.0	0.0	0.0	-2.69688e+16	R-HSA-983170	Reactome Gene Sets	Antigen Presentation: Folding, assembly and peptide loading of class I MHC		-5063749538433440	7.29298e+16	6722382226965310	CALR|CANX|PDIA3|SEC13|SEC24C|BCAP31|PIK3R4|SAR1B	-3.564e+16	177.0	1.0	1.0
1	0	0	0	1	-5045779452086160	0.0	0.0	0.0	-4614987240340780	GO:0046514	GO Biological Processes	ceramide catabolic process	19_GO:0008152 metabolic process	-5045779452086160	1.68772e+16	8709360777228940	ASAH1|GALC|GBA1|HEXA|HEXB	-3740976613618390	49.0	0.0	0.0
0	0	1	0	0	0.0	0.0	-489215901986826	0.0	0.0	GO:0018209	GO Biological Processes	peptidyl-serine modification	19_GO:0008152 metabolic process	-5034793553218480	2.87928e+16	5.31352e+16	ATM|ATR|MTOR|GSK3B|MAP3K10|NTRK2|PDPK1|PRKCG|PRKDC|RPS6KA3|TAF1|VRK1|TNKS|BRSK2|MAP3K13|MAST1|CAB39|CAMK1D|CAMKV|TTBK2|MGAT5B|SBK1	-3536268845471790	143.0	0.0	0.0
1	0	0	0	0	-5031723298997900	0.0	0.0	0.0	0.0	CORUM:2904	CORUM	Respiratory chain complex I (intermediate VII/650kD), mitochondrial		-5031723298997900	2.70036e+16	1.00846e+16	NDUFS2|NDUFS3|NDUFS4|NDUFS7	-3728879392502310	18.0	0.0	0.0
1	0	0	0	0	-5031723298997900	0.0	0.0	0.0	0.0	GO:0030242	GO Biological Processes	autophagy of peroxisome	19_GO:0008152 metabolic process	-5031723298997900	2.70036e+16	1.00846e+16	ATM|PEX2|SQSTM1|PIK3R4	-3728879392502310	178.0	1.0	1.0
0	0	0	0	1	0.0	0.0	0.0	0.0	-3485532657225890	GO:0015800	GO Biological Processes	acidic amino acid transport	19_GO:0051179 localization	-5031647636570090	6261409642988580	6434669689069320	APBA1|CLN8|KCNJ10|NF1|NTRK2|PSEN1|SLC6A1|ARL6IP5|PRAF2	-3.53435e+16	83.0	0.0	0.0
0	0	1	0	0	0.0	0.0	-5024654002061700	0.0	0.0	R-HSA-9013026	Reactome Gene Sets	RHOB GTPase cycle		-5024654002061700	1.23445e+16	7945716027268570	ARHGDIG|BCR|PIK3R1|CIT|MCF2L|ARHGAP39	-3.72259e+16	179.0	1.0	1.0
1	0	1	1	0	-2461250709257410	0.0	-3498649964393170	-2.25272e+16	0.0	GO:0071692	GO Biological Processes	protein localization to extracellular region	19_GO:0051179 localization	-50208056097552	3.43076e+16	5528156952311660	AP1B1|CANX|DMTN|MTTP|PAFAH1B1|PRF1|PTPRN|PTPRN2|SEL1L|RIMS2|CPLX1|COPG1|TANGO6|RAB3C|TANGO2|MIA3|SNX19	-3.52473e+16	161.0	0.0	0.0
1	0	0	1	0	-5014679406712490	0.0	0.0	-3.69455e+16	0.0	GO:0006891	GO Biological Processes	intra-Golgi vesicle-mediated transport	19_GO:0051179 localization	-5014679406712490	1.19133e+16	7807181103800850	COPA|COPB1|COPB2|GOSR2|COG5|COPG1	-37137856358776	180.0	1.0	1.0
0	0	0	0	1	0.0	0.0	0.0	0.0	-3466353183117390	hsa05031	KEGG Pathway	Amphetamine addiction		-5.01127e+16	4.59775e+16	5.93213e+16	ADCY5|CALM1|ATF6B|DDC|GRIA2|GRIA3|GRIN1|PDYN|PRKCG|SLC6A3|TH|PPP1R1B	-3516851525780970	86.0	0.0	0.0
0	0	0	1	0	0.0	0.0	0.0	-5008053392363590	0.0	R-HSA-202403	Reactome Gene Sets	TCR signaling		-5008053392363590	7754871794871790	6904078780526040	PSMA7|PSMC4|PSMC5|PSMC6|PSMD2|PSMF1|PSMD6|PSME3	-3.70794e+16	52.0	0.0	0.0
0	0	1	0	0	0.0	0.0	-4998692177430670	0.0	0.0	GO:1904861	GO Biological Processes	excitatory synapse assembly	19_GO:0032502 developmental process	-4998692177430670	2880380952380950	1.04006e+16	NRXN1|NRXN2|SLITRK3|SHANK3	-3698964298522570	63.0	0.0	0.0
0	1	0	0	1	0.0	-2.30381e+16	0.0	0.0	-3094128647173090	GO:0008542	GO Biological Processes	visual learning	19_GO:0032501 multicellular organismal process	-4992482808122680	5507721445221440	619700624442778	APP|CHRNB2|GRIN1|MECP2|NF1|ABCC8|SYNGAP1|DDHD2|NPTN|PPP1R1B	-3.50065e+16	70.0	0.0	0.0
1	1	0	1	1	-3150560466197950	-2.30381e+16	0.0	-2087866640966740	-2074297425312310	GO:0021795	GO Biological Processes	cerebral cortex cell migration	19_GO:0032502 developmental process	-4992482808122680	5507721445221440	619700624442778	DAB1|FOXG1|PAFAH1B1|RELN|PSEN1|NKX2-1|ADGRG1|RTN4|DAB2IP|ARX	-3.50065e+16	6.0	0.0	0.0
0	0	1	0	1	0.0	0.0	-2343370181980290	0.0	-421904500628647	GO:1990089	GO Biological Processes	response to nerve growth factor	19_GO:0050896 response to stimulus	-4992482808122680	5507721445221440	619700624442778	PARP1|APP|RAPGEF1|MAPT|NTRK2|SORT1|SH3GL2|UBE3A|RAPGEF2|KIDINS220	-3.50065e+16	173.0	0.0	0.0
1	0	0	1	0	-3.34126e+16	0.0	0.0	-4981550151925870	0.0	R-HSA-69239	Reactome Gene Sets	Synthesis of DNA		-4981550151925870	76907819453274	6867122183937530	PSMA7|PSMC4|PSMC5|PSMC6|PSMD2|PSMF1|PSMD6|PSME3	-3684530577004740	52.0	0.0	0.0
0	0	0	1	0	0.0	0.0	0.0	-4981550151925870	0.0	R-HSA-8878166	Reactome Gene Sets	Transcriptional regulation by RUNX2		-4981550151925870	76907819453274	6867122183937530	PSMA7|PSMC4|PSMC5|PSMC6|PSMD2|PSMF1|PSMD6|PSME3	-3684530577004740	52.0	0.0	0.0
0	0	1	0	0	0.0	0.0	-4767062424506950	0.0	0.0	WP706	WikiPathways	Sudden infant death syndrome (SIDS) susceptibility pathways		-4967221874023120	3.1394e+16	5379766096830610	ATP1A3|CHRNA4|CHRNB2|CREBBP|DDC|GRIN1|MECP2|NTRK2|PLP1|SNAP25|SPTBN1|TH|HSP90B1|VIPR2|YWHAG|DEAF1|YWHAQ|TPPP|SCN3B	-3477155471066300	181.0	1.0	1.0
1	0	0	1	0	-4244369534774430	0.0	0.0	-35772197828214	0.0	GO:0090110	GO Biological Processes	COPII-coated vesicle cargo loading	19_GO:0051179 localization	-4967176238933120	1.05748e+16	7354337303115980	RAB1A|SEC13|SEC24C|SEC23B|SCAP|MIA3	-3477155471066300	131.0	0.0	0.0
1	0	0	1	0	-496557591086111	0.0	0.0	-3285574781141830	0.0	R-HSA-8953854	Reactome Gene Sets	Metabolism of RNA		-496557591086111	254572775339186	5132689099540450	DDX1|DHX8|DKC1|EPRS1|NCBP1|PARN|PSMD1|PSMD2|PSMD3|SEC13|AAAS|EFTUD2|SKIC3|PSMD6|NOP56|TBL3|UTP20|EXOSC3|TRNT1|CPSF3|DUS2|NAT10|NUP133|ELAC2|THADA|WDR75|TSEN54	-3670366866471730	166.0	0.0	0.0
0	0	0	0	1	0.0	0.0	0.0	0.0	-4965078405055940	GO:0055075	GO Biological Processes	potassium ion homeostasis	19_GO:0042592 homeostatic process	-4965078405055940	1.69112e+16	8694296240455230	ATP1A3|SLC12A6|SLC12A9|SLC12A5|KCTD7	-3670366866471730	172.0	0.0	0.0
1	0	0	0	0	-4960888809785000	0.0	0.0	0.0	0.0	GO:0051276	GO Biological Processes	chromosome organization	19_GO:0009987 cellular process	-4960888809785000	2.97209e+16	5323424619482430	PARP1|ATM|ATR|DDX1|DKC1|ERCC4|MLH1|MRE11|PRKDC|RFC1|XRCC1|AAAS|RUVBL1|CDC23|AIFM1|ZW10|PIBF1|SETX|NUP133|TWNK|CTC1	-3.66656e+16	85.0	0.0	0.0
0	0	1	0	0	0.0	0.0	-495352618600078	0.0	0.0	GO:0030072	GO Biological Processes	peptide hormone secretion	19_GO:0051179 localization	-495352618600078	120015873015873	781510904173548	CPE|PTPRN|PTPRN2|RIMS2|CPLX1|SMPD3	-3.65996e+16	161.0	0.0	0.0
0	0	1	0	0	0.0	0.0	-4946314596406990	0.0	0.0	GO:1990504	GO Biological Processes	dense core granule exocytosis	19_GO:0051179 localization	-4946314596406990	6172244897959180	1.34352e+16	STXBP1|CADPS|UNC13A	-3.65428e+16	182.0	1.0	1.0
1	0	0	0	1	-4.94398e+16	0.0	0.0	0.0	-2.44147e+16	WP5304	WikiPathways	Cholesterol metabolism		-4.94398e+16	7500992063492060	6771989771436680	CYP27A1|MTTP|MVK|NPC1|TM7SF2|NPC2|SLC27A4|SAR1B	-3.65232e+16	183.0	1.0	1.0
0	0	0	0	1	0.0	0.0	0.0	0.0	-3892148325531460	GO:0099505	GO Biological Processes	regulation of presynaptic membrane potential	19_GO:0065007 biological regulation	-4943667923467520	704988344988345	6573285196326210	GABRA3|GLRA1|GRIA3|GRIK2|GRIK5|KCNA2|KCNJ11|SCN1A	-3.45724e+16	99.0	0.0	0.0
0	0	1	0	1	0.0	0.0	-293302021188418	0.0	-2653899607428700	R-HSA-418360	Reactome Gene Sets	Platelet calcium homeostasis		-4943667923467520	704988344988345	6573285196326210	ATP2A2|ATP2B1|ATP2B2|ATP2B3|CALM1|ITPR1|SLC8A2|SLC8A3	-3.45724e+16	84.0	0.0	0.0
1	0	0	1	0	-4042362764860440	0.0	0.0	-2.43659e+16	0.0	GO:0016567	GO Biological Processes	protein ubiquitination	19_GO:0008152 metabolic process	-4942138468037600	1.95368e+16	4819552411917030	AMFR|ARRB1|DDB1|PEX10|PEX2|HLTF|TAF1|UBA1|UBE2A|UBE3A|VCP|USP5|USP9X|CUL4B|CUL3|CUL2|TNKS|CDC23|NAE1|NEURL1|UBE4A|NPEPPS|MED24|PJA2|HUWE1|STUB1|RNF13|WDTC1|HECW1|ANAPC13|RNF167|TRPC4AP|CRBN|RNF216|RNF130|VPS11|IRF2BPL|ANAPC1|DCAF17|DCAF11|RNF170|SYVN1|UBR3|RNF168|HECTD4|NHLRC1|ARK2C	-3.45631e+16	3.0	0.0	0.0
1	0	0	0	0	-4938447357696000	0.0	0.0	0.0	0.0	GO:0032205	GO Biological Processes	negative regulation of telomere maintenance	19_GO:0048519 negative regulation of biological process	-4938447357696000	1.1573e+16	7674230902990110	PARP1|ATM|ERCC4|XRCC1|NAT10|CTC1	-3.64794e+16	184.0	1.0	1.0
0	0	0	1	0	0.0	0.0	0.0	-4934374565859400	0.0	GO:1903541	GO Biological Processes	regulation of exosomal secretion	19_GO:0051179 localization	-4934374565859400	2.73701e+16	1012729888058630	RAB7A|STAM|ATP9A|ATP13A2	-3.64424e+16	185.0	1.0	1.0
1	0	0	1	1	-3.29685e+16	0.0	0.0	-2875861062419930	-2.03382e+16	GO:0019751	GO Biological Processes	polyol metabolic process	19_GO:0008152 metabolic process	-4929488652038480	3937434905520010	5655453974149900	ABCA2|ASAH1|CYP27A1|GBA1|GCH1|MECP2|PTS|QDPR|SPR|SYNJ1|IP6K1|SPTLC1|PLCB1|SPTSSB	-3446034661243150	94.0	0.0	0.0
0	0	1	1	0	0.0	0.0	-4103196294310730	-2046514229968830	0.0	GO:0031333	GO Biological Processes	negative regulation of protein-containing complex assembly	19_GO:0048519 negative regulation of biological process	-4923215716246940	3.23719e+16	5391121914110560	ADD1|ADD2|CAPZB|DMTN|FLII|GBA1|GSK3B|SPTB|SPTBN1|SPTBN2|STXBP1|TBCD|VDAC2|TUBB4A|ARFGEF1|TMOD2|CRBN|VPS35	-3440353810726550	36.0	0.0	0.0
1	1	0	0	0	-4916614597765610	-2780846708794330	0.0	0.0	0.0	GO:0006403	GO Biological Processes	RNA localization	19_GO:0051179 localization	-4916614597765610	4655788177339900	5930091480300280	ATM|ATR|DKC1|NCBP1|ATXN2|SEC13|AAAS|CKAP5|LRPPRC|DDX19A|NUP133|XPO5	-3.62838e+16	187.0	1.0	1.0
1	0	0	0	1	-4916614597765610	0.0	0.0	0.0	-3.06596e+16	GO:0055088	GO Biological Processes	lipid homeostasis	19_GO:0042592 homeostatic process	-4916614597765610	4655788177339900	5930091480300280	ABCA2|ABCA3|ABCD1|MTTP|NPC1|CYP7B1|NPC2|ATP13A2|SAR1B|THADA|SLC25A46|NUS1	-3.62838e+16	186.0	1.0	1.0
1	0	0	0	1	-2725600752691450	0.0	0.0	0.0	-4914779270676250	GO:0042159	GO Biological Processes	lipoprotein catabolic process	19_GO:0008152 metabolic process	-4914779270676250	2705792887497200	1.00655e+16	ATM|CTSD|LIPA|PPT1	-3627296628869590	188.0	1.0	1.0
1	0	0	0	0	-4893713887861460	0.0	0.0	0.0	0.0	R-HSA-1369007	Reactome Gene Sets	Mitochondrial ABC transporters		-4893713887861460	5063169642857140	1.21722e+16	ABCB7|ABCB6|ABCB8	-3.60956e+16	189.0	1.0	1.0
1	0	0	0	0	-4893283385147020	0.0	0.0	0.0	0.0	GO:0032210	GO Biological Processes	regulation of telomere maintenance via telomerase	19_GO:0008152 metabolic process	-4893283385147020	891627358490566	7072817295721130	ATM|ATR|DKC1|PARN|PNKP|NAT10|CTC1	-3.60956e+16	118.0	0.0	0.0
0	0	1	0	1	0.0	0.0	-3.09012e+16	0.0	-2.73048e+16	hsa04978	KEGG Pathway	Mineral absorption		-4.86915e+16	4846794871794870	5913780623385690	ATP1A3|ATP2B1|ATP2B2|ATP2B3|ATP7B|CLCN2|FTL|SLC11A2|SLC8A2|SLC8A3|SLC6A19	-3.39099e+16	84.0	0.0	0.0
1	1	0	1	0	-2.62522e+16	-2566725733618110	0.0	-2.18709e+16	0.0	GO:0034504	GO Biological Processes	protein localization to nucleus	19_GO:0051179 localization	-4863407176993460	2.89155e+16	5.21329e+16	CALR|CSE1L|TOR1A|KPNA1|LMNB1|NF1|PIK3R1|RANGAP1|RAP1GDS1|SEC13|NUP214|SQSTM1|NUP155|POM121|TMEM147|SYNE1|TNPO2|IPO11|NUP133|SPG11|POM121C	-3385838025317580	88.0	0.0	0.0
0	0	0	0	1	0.0	0.0	0.0	0.0	-4860195279682690	GO:1903078	GO Biological Processes	positive regulation of protein localization to plasma membrane	19_GO:0051179 localization	-4860195279682690	1.14996e+16	7624792913259130	CLN3|LRP1|PDPK1|PRNP|RER1|ATP2C1	-3.57982e+16	108.0	0.0	0.0
0	0	1	0	0	0.0	0.0	-4.85085e+16	0.0	0.0	GO:0002790	GO Biological Processes	peptide secretion	19_GO:0051179 localization	-4.85085e+16	1.15215e+16	7628590633856050	CPE|PTPRN|PTPRN2|RIMS2|CPLX1|SMPD3	-3.57196e+16	161.0	0.0	0.0
1	0	0	0	0	-2.15874e+16	0.0	0.0	0.0	0.0	GO:0031503	GO Biological Processes	protein-containing complex localization	19_GO:0051179 localization	-4841787888878900	3.19374e+16	532242926083114	AP2A1|ATM|ATR|DLG4|KIF5A|LMNB1|RELN|SNAP25|FXR1|AP3D1|WASHC5|CLSTN1|IFT172|NSG1|SDAD1|VPS35|CACNG8|STX1B	-3.36539e+16	156.0	0.0	0.0
1	0	0	0	0	-4840545497400190	0.0	0.0	0.0	0.0	CORUM:2905	CORUM	Respiratory chain complex I (intermediate), mitochondrial		-4840545497400190	2.45487e+16	957844788044316	NDUFS2|NDUFS3|NDUFS4|NDUFS7	-3563132822414810	18.0	0.0	0.0
1	0	0	0	0	-4840545497400190	0.0	0.0	0.0	0.0	GO:0034982	GO Biological Processes	mitochondrial protein processing	19_GO:0008152 metabolic process	-4840545497400190	2.45487e+16	957844788044316	SPG7|PMPCB|AFG3L2|PMPCA	-3563132822414810	145.0	0.0	0.0
0	0	1	0	0	0.0	0.0	-4835959504225500	0.0	0.0	hsa04725	KEGG Pathway	Cholinergic synapse		-4835959504225500	8921533923303830	7054353670729940	CACNA1A|CHRNA4|CHRNB2|KCNQ2|KCNQ3|PIK3R1|PLCB1	-3.55892e+16	190.0	1.0	1.0
1	0	0	1	0	-24632703688228	0.0	0.0	-4835198629050180	0.0	GO:0070646	GO Biological Processes	protein modification by small protein removal	19_GO:0008152 metabolic process	-4835198629050180	6306672845227060	6384195900410590	TOR1A|ATXN3|USP5|COPS8|COPS5|BABAM1|COPS7A|COPS4|USP32	-3558522670919850	66.0	0.0	0.0
1	0	1	0	0	-2.84965e+16	0.0	-2.08476e+16	0.0	0.0	GO:0000302	GO Biological Processes	response to reactive oxygen species	19_GO:0050896 response to stimulus	-4834182818696000	2.97046e+16	5227788162070860	ATM|PTK2B|FXN|MAPT|MPV17|ND6|PEX10|PTPRN|PEX2|PRDX2|UBE3A|ADAM9|SQSTM1|AIFM1|CAMKK2|SETX|ADPRS|SMPD3|AGAP3|SIRPA	-3.35836e+16	58.0	0.0	0.0
0	0	1	0	0	0.0	0.0	-4212152042530020	0.0	0.0	GO:0035640	GO Biological Processes	exploration behavior	19_GO:0032501 multicellular organismal process	-48286441761503	6822467854725910	6430873600403330	DLG4|ATXN3|TNR|UBE3A|CRBN|SLC4A10|JPH3|LRRTM1	-3.35457e+16	191.0	1.0	1.0
0	0	1	0	1	0.0	0.0	-2.89103e+16	0.0	-2612473841275350	R-HSA-2122948	Reactome Gene Sets	Activated NOTCH1 Transmits Signal to the Nucleus		-48286441761503	6822467854725910	6430873600403330	ADAM10|ARRB1|CNTN1|PSEN1|PSEN2|NEURL1|NCSTN|DNER	-3.35457e+16	95.0	0.0	0.0
1	0	0	0	0	-4826320458466040	0.0	0.0	0.0	0.0	WP4224	WikiPathways	Purine metabolism and related disorders		-4826320458466040	1.53429e+16	825202109025331	ATIC|GART|PNP|PRPS1|RRM2B	-3550379969574820	192.0	1.0	1.0
1	0	0	0	1	-3382359132577660	0.0	0.0	0.0	-4821486979488990	GO:0003333	GO Biological Processes	amino acid transmembrane transport	19_GO:0051179 localization	-4821486979488990	8845861362971620	7020423542352490	CLN3|CLN8|PSEN1|SLC6A5|ARL6IP5|SLC38A7|MFSD12	-3.54591e+16	83.0	0.0	0.0
0	0	0	0	1	0.0	0.0	0.0	0.0	-4.80861e+16	GO:0048143	GO Biological Processes	astrocyte activation	19_GO:0032502 developmental process	-4.80861e+16	2.55547e+16	9759958821436370	APP|GRN|LRP1|PSEN1	-3534590381651660	101.0	0.0	0.0
1	0	0	0	0	-4807835719945590	0.0	0.0	0.0	0.0	GO:0009408	GO Biological Processes	response to heat	19_GO:0050896 response to stimulus	-4807835719945590	6199799562682210	6322040192138450	EIF2B1|MTOR|ATXN3|VCP|EIF2B4|EIF2B3|EIF2B2|EIF2B5|STUB1	-3534590381651660	77.0	0.0	0.0
1	0	0	0	0	-2840084639616400	0.0	0.0	0.0	0.0	GO:0043434	GO Biological Processes	response to peptide hormone	19_GO:0050896 response to stimulus	-4807024612049780	2.27416e+16	4.90276e+16	PARP1|EIF2B1|EPRS1|MTOR|GSK3B|LTA4H|MAP1B|OTC|PDPK1|PIK3R1|PIK3R2|PRKDC|QDPR|RANGAP1|RAP1GDS1|SORT1|SLC2A1|ABCC8|TH|YWHAG|EIF2B4|EIF2B3|EIF2B2|EIF2B5|SLC27A4|SCAP|WDTC1|PLCB1|SLC39A14|VPS13C|SLC30A10|ARID1B	-33341065836175	100.0	0.0	0.0
1	0	0	0	0	-3.47308e+16	0.0	0.0	0.0	0.0	GO:0032288	GO Biological Processes	myelin assembly	19_GO:0032502 developmental process	-4.80528e+16	8046062633019150	6702471166933090	ABCA2|ANK2|CNTN1|MAG|GNPAT|FIG4|TPPP	-3.33294e+16	193.0	1.0	1.0
1	0	0	1	0	-2.29016e+16	0.0	0.0	-3.3977e+16	0.0	GO:1903320	GO Biological Processes	regulation of protein modification by small protein conjugation or removal	19_GO:0008152 metabolic process	-4797793528239770	2581744427447550	5039198860448740	ARRB1|GPS1|GSK3B|PRKCG|PSEN1|TAF1|UBE3A|VCP|WFS1|CUL3|SQSTM1|HUWE1|STUB1|COPS8|COPS5|FAM107A|TCF25|UFL1|UBQLN1|COPS7A|COPS4|TOLLIP|WDR48|NDFIP1|NHLRC1	-3.32718e+16	46.0	0.0	0.0
1	0	0	0	1	-3.9779e+16	0.0	0.0	0.0	-2.12581e+16	GO:0070482	GO Biological Processes	response to oxygen levels	19_GO:0050896 response to stimulus	-4784353041302460	238097771793424	4.93967e+16	ATM|ATP6V1A|ATP6AP1|CHRNA4|CHRNB2|CREBBP|PTK2B|MTOR|ITPR1|KCND2|MECP2|ATP6|NDUFS2|NF1|SLC11A2|PSEN2|SCN2A|SLC2A1|SLC8A3|TH|HSP90B1|XRCC1|ATP6V0D1|AIFM1|LONP1|NPEPPS|STUB1|SCAP|UBQLN1	-3.31432e+16	194.0	1.0	1.0
0	0	0	0	1	0.0	0.0	0.0	0.0	-4780678121043880	GO:0043086	GO Biological Processes	negative regulation of catalytic activity	19_GO:0065007 biological regulation	-4780678121043880	3204228419404580	5304066071704600	APLP2|APP|CLN3|CSTB|CTSB|GBA1|GRM3|LRP1|PDPK1|SERPINI1|PRNP|PSEN1|RPS6KA3|SORT1|SMPD1|TMBIM6|THY1|YWHAG	-350912448240078	111.0	0.0	0.0
1	0	0	1	1	-2671375151041980	0.0	0.0	-2.40534e+16	-4779385019284880	R-HSA-9694548	Reactome Gene Sets	Maturation of spike protein		-4779385019284880	1.554e+16	8288568301398580	CANX|STT3A|RPN2|MAN1B1|GANAB	-3.50856e+16	65.0	0.0	0.0
0	0	0	1	0	0.0	0.0	0.0	-4778241968481020	0.0	R-HSA-8939236	Reactome Gene Sets	RUNX1 regulates transcription of genes involved in differentiation of HSCs		-4778241968481020	7213834227787710	6585934520586380	PSMA7|PSMC4|PSMC5|PSMC6|PSMD2|PSMF1|PSMD6|PSME3	-3507778153450970	52.0	0.0	0.0
1	0	0	0	0	-2805147912243760	0.0	0.0	0.0	0.0	GO:0006851	GO Biological Processes	mitochondrial calcium ion transmembrane transport	19_GO:0051179 localization	-4.77721e+16	9913898601398600	7071343375606050	SLC8A3|PMPCB|AFG3L2|GHITM|SLC25A23|MICU2	-3.30889e+16	145.0	0.0	0.0
1	0	0	0	0	-2805147912243760	0.0	0.0	0.0	0.0	GO:1900034	GO Biological Processes	regulation of cellular response to heat	19_GO:0050896 response to stimulus	-4.77721e+16	9913898601398600	7071343375606050	ATM|ATR|CREBBP|MTOR|GSK3B|MAPT	-3.30889e+16	167.0	0.0	0.0
1	0	0	1	1	-2.48823e+16	0.0	0.0	-4.67199e+16	-2.79336e+16	GO:0000041	GO Biological Processes	transition metal ion transport	19_GO:0051179 localization	-4769751932817890	3.81566e+16	5507097423730410	ABCB7|ATP7B|CLTC|CP|FXN|FTL|SLC11A2|SLC39A7|ABCB6|SLC39A14|SLC39A6|ATP2C1|SLC30A10|MMGT1	-330200755966223	195.0	1.0	1.0
1	0	1	1	0	-3.02901e+16	0.0	-3.35932e+16	-2.0154e+16	0.0	GO:0051646	GO Biological Processes	mitochondrion localization	19_GO:0051179 localization	-4746327612341260	5183737830796650	5928916979970780	MAP1B|MAPT|OPA1|UCHL1|LRPPRC|MSTO1|SYBU|ACTR10|ATCAY|BRAT1	-3281998416537410	196.0	1.0	1.0
0	0	1	0	0	0.0	0.0	-4744427066572970	0.0	0.0	GO:1990416	GO Biological Processes	cellular response to brain-derived neurotrophic factor stimulus	19_GO:0050896 response to stimulus	-4744427066572970	5400714285714280	1.25381e+16	MAPT|NTRK2|SH3GL2	-3.47848e+16	197.0	1.0	1.0
0	0	1	0	0	0.0	0.0	-4743892519851160	0.0	0.0	GO:0099068	GO Biological Processes	postsynapse assembly	19_GO:0032502 developmental process	-4743892519851160	2.50468e+16	964677442331004	NRXN1|NRXN2|SLITRK3|SHANK3	-3.47848e+16	63.0	0.0	0.0
1	1	0	1	1	-2505910748624710	-2.49804e+16	0.0	-2.27895e+16	-2.26516e+16	GO:0047496	GO Biological Processes	vesicle transport along microtubule	19_GO:0051179 localization	-4743670083691230	5803257717891860	6102133837576740	KIF1A|CLN3|HTT|KIF5A|PAFAH1B1|RAB1A|AP3D1|KIF1C|KIFAP3	-3279907482203750	55.0	0.0	0.0
0	0	0	1	0	0.0	0.0	0.0	-4729694754016510	0.0	R-HSA-69206	Reactome Gene Sets	G1/S Transition		-4729694754016510	7103699354081030	6519376964027470	PSMA7|PSMC4|PSMC5|PSMC6|PSMD2|PSMF1|PSMD6|PSME3	-346571306651439	52.0	0.0	0.0
0	0	0	1	0	0.0	0.0	0.0	-4.72845e+16	0.0	GO:0009713	GO Biological Processes	catechol-containing compound biosynthetic process	19_GO:0008152 metabolic process	-4.72845e+16	2448906882591090	9537043647914090	DDC|GCH1|SLC6A3|TH	-3465538850777320	86.0	0.0	0.0
0	0	0	1	0	0.0	0.0	0.0	-4.72845e+16	0.0	GO:0042423	GO Biological Processes	catecholamine biosynthetic process	19_GO:0008152 metabolic process	-4.72845e+16	2448906882591090	9537043647914090	DDC|GCH1|SLC6A3|TH	-3465538850777320	86.0	0.0	0.0
0	0	0	1	0	0.0	0.0	0.0	-4.72845e+16	0.0	GO:2000434	GO Biological Processes	regulation of protein neddylation	19_GO:0008152 metabolic process	-4.72845e+16	2448906882591090	9537043647914090	COPS8|COPS5|COPS7A|COPS4	-3465538850777320	66.0	0.0	0.0
1	0	0	0	1	-4.72694e+16	0.0	0.0	0.0	-3245799567931530	GO:1901264	GO Biological Processes	carbohydrate derivative transport	19_GO:0051179 localization	-4.72694e+16	7013914656771800	6.47902e+16	ABCD1|CLN3|PSAP|VLDLR|SLC33A1|SLC35B1|NPC2|G6PC3	-3.46439e+16	198.0	1.0	1.0
1	0	0	0	0	-4725169433213510	0.0	0.0	0.0	0.0	GO:0001881	GO Biological Processes	receptor recycling	19_GO:0008152 metabolic process	-4725169433213510	1.46759e+16	8045192098999510	CTSD|PEX6|PEX10|PEX2|USP9X	-3.46404e+16	37.0	0.0	0.0
1	1	0	1	0	-472364233972663	-2.29774e+16	0.0	-2.6681e+16	0.0	hsa01240	KEGG Pathway	Biosynthesis of cofactors		-472364233972663	4853583099906620	5859554428201130	COX10|COX15|DLD|EPRS1|GSS|MTHFD1|PMM2|SPR|PDXK|NFS1|PANK2	-3.46322e+16	199.0	1.0	1.0
1	0	0	0	1	-3.63083e+16	0.0	0.0	0.0	-4.7212e+16	GO:0033619	GO Biological Processes	membrane protein proteolysis	19_GO:0008152 metabolic process	-4.7212e+16	1.51311e+16	8163713490513210	ADAM10|PSEN1|ADAM9|NCSTN|BACE1	-3.46113e+16	95.0	0.0	0.0
0	0	0	1	0	0.0	0.0	0.0	-4642965070914630	0.0	GO:0043279	GO Biological Processes	response to alkaloid	19_GO:0050896 response to stimulus	-4718016577534480	3776723276723270	5458957884959180	CHRNB2|DDC|PTK2B|ND6|PPP2R2A|PRKCG|SLC6A1|SLC6A3|SMPD1|TH|UBE3A|UQCRC1|EFTUD2|PPP1R1B	-3.25651e+16	200.0	1.0	1.0
0	0	0	1	0	0.0	0.0	0.0	-4712387919765550	0.0	R-HSA-9010553	Reactome Gene Sets	Regulation of expression of SLITs and ROBOs		-4712387919765550	6086672629695880	6229758039652580	PSMA7|PSMC4|PSMC5|PSMC6|PSMD2|CUL2|PSMF1|PSMD6|PSME3	-3.45338e+16	52.0	0.0	0.0
0	1	0	1	0	0.0	-2029883238153990	0.0	-4.5559e+16	0.0	R-HSA-5683057	Reactome Gene Sets	MAPK family signaling cascades		-4709086912862150	2.359e+16	4883895703187840	ACTB|ARRB1|CALM1|DLG4|DUSP8|GRIN1|NCAM1|NF1|PHB1|PIK3R1|PIK3R2|PSMA7|PSMC4|PSMC5|PSMC6|PSMD1|PSMD2|PSMD3|SPTB|SPTBN1|SPTBN2|CUL3|SYNGAP1|PSMF1|RAPGEF2|PSMD6|PSME3|DAB2IP|KSR2	-3.24815e+16	52.0	0.0	0.0
0	0	1	0	1	0.0	0.0	-3.29513e+16	0.0	-46994214519018	GO:0098742	GO Biological Processes	cell-cell adhesion via plasma-membrane adhesion molecules	19_GO:0009987 cellular process	-46994214519018	4846583045612800	5845545915007530	CDH2|CDH10|CELSR2|PCDH9|PTPRD|CLSTN3|CLSTN1|ADGRL3|NPTN|ATP2C1|CADM2	-3.44112e+16	201.0	1.0	1.0
0	1	1	0	0	0.0	-4688056505156840	-3277796891390210	0.0	0.0	GO:1903861	GO Biological Processes	positive regulation of dendrite extension	19_GO:0040007 growth	-4688056505156840	2.42388e+16	9477855632637510	RIMS2|SLC23A2|RIMS1|UNC13A	-3431517010473180	202.0	1.0	1.0
1	0	0	0	0	-4686601541677710	0.0	0.0	0.0	0.0	GO:0007368	GO Biological Processes	determination of left/right symmetry	19_GO:0032502 developmental process	-4686601541677710	531566366704162	5976075235281990	AP1B1|FOLR1|PSEN1|OFD1|RPGRIP1L|IFT172|AHI1|MKS1|CC2D2A|ARL13B	-3.43068e+16	22.0	0.0	0.0
0	0	0	1	0	0.0	0.0	0.0	-4686514089718140	0.0	WP4313	WikiPathways	Ferroptosis		-4686514089718140	1.07375e+16	7318241051140070	CP|FTL|GCH1|VDAC2|SLC39A14|CHMP5	-3.43068e+16	130.0	0.0	0.0
1	1	0	0	0	-4.68108e+16	-3.12144e+16	0.0	0.0	0.0	R-HSA-6784531	Reactome Gene Sets	tRNA processing in the nucleus		-4.68108e+16	8290570175438590	6755560753785630	DDX1|SEC13|AAAS|TRNT1|NUP133|ELAC2|TSEN54	-3.42686e+16	166.0	0.0	0.0
1	0	0	1	0	-4670945375837330	0.0	0.0	-2639843562133450	0.0	WP4396	WikiPathways	Nonalcoholic fatty liver disease		-4670945375837330	4790956221198150	5802073151152290	NDUFA10|NDUFS1|NDUFS2|NDUFS3|NDUFV1|NDUFS4|NDUFS8|SDHA|UQCRC1|UQCRC2|NDUFS7	-3.41841e+16	18.0	0.0	0.0
1	0	0	1	0	-4670945375837330	0.0	0.0	-2639843562133450	0.0	hsa04932	KEGG Pathway	Non-alcoholic fatty liver disease		-4670945375837330	4790956221198150	5802073151152290	NDUFA10|NDUFS1|NDUFS2|NDUFS3|NDUFV1|NDUFS4|NDUFS8|SDHA|UQCRC1|UQCRC2|NDUFS7	-3.41841e+16	18.0	0.0	0.0
0	1	1	0	0	0.0	-3.7033e+16	-4670604930156290	0.0	0.0	GO:0048639	GO Biological Processes	positive regulation of developmental growth	19_GO:0040007 growth	-4670604930156290	6982741702741700	6443562157529690	L1CAM|MAP1B|MAPT|MAP3K13|RIMS2|UNC13A|PLCB1|SYT3	-3.41841e+16	203.0	1.0	1.0
0	1	0	0	0	0.0	-3180683514803510	0.0	0.0	0.0	GO:1900273	GO Biological Processes	positive regulation of long-term synaptic potentiation	19_GO:0048518 positive regulation of biological process	-4669918368323660	7710810023310020	6.52097e+16	APP|LGMN|RELN|SQSTM1|CRTC1|NPTN|SHANK3	-3.21477e+16	92.0	0.0	0.0
0	0	1	0	0	0.0	0.0	-4667075335559100	0.0	0.0	R-HSA-210500	Reactome Gene Sets	Glutamate Neurotransmitter Release Cycle		-4669918368323660	7710810023310020	6.52097e+16	SNAP25|STXBP1|PPFIA4|PPFIA3|ARL6IP5|CPLX1|RIMS1	-3.21477e+16	135.0	0.0	0.0
1	0	0	0	0	-4669568626213670	0.0	0.0	0.0	0.0	CORUM:433	CORUM	BASC complex (BRCA1-associated genome surveillance complex)		-4669568626213670	2.2503e+16	9135413642048130	ATM|MLH1|MRE11|RFC1	-3.41841e+16	204.0	1.0	1.0
0	0	0	1	0	0.0	0.0	0.0	-466901488839	0.0	GO:0019626	GO Biological Processes	short-chain fatty acid catabolic process	19_GO:0008152 metabolic process	-466901488839	4985274725274720	1203713096227500	PCCA|PCCB|PHYH	-3.41841e+16	128.0	0.0	0.0
0	0	0	1	0	0.0	0.0	0.0	-466901488839	0.0	GO:1903071	GO Biological Processes	positive regulation of ER-associated ubiquitin-dependent protein catabolic process	19_GO:0048518 positive regulation of biological process	-466901488839	4985274725274720	1203713096227500	BCAP31|UBQLN2|UBQLN1	-3.41841e+16	142.0	0.0	0.0
1	0	0	1	1	-3468328073059550	0.0	0.0	-2.67042e+16	-265239119743251	R-HSA-446219	Reactome Gene Sets	Synthesis of substrates in N-glycan biosythesis		-4659593667576790	4.616e+16	5696528174988570	GFPT1|GLB1|NEU1|PMM2|CTSA|SLC17A5|ST8SIA3|CMAS|SRD5A3|DHDDS|NUS1	-3208662793430770	132.0	0.0	0.0
0	0	0	1	0	0.0	0.0	0.0	-4658468415268090	0.0	R-HSA-2454202	Reactome Gene Sets	Fc epsilon receptor (FCERI) signaling		-4658468415268090	6944661308840410	6422120671677750	PSMA7|PSMC4|PSMC5|PSMC6|PSMD2|PSMF1|PSMD6|PSME3	-3.40959e+16	52.0	0.0	0.0
1	0	0	0	0	-4656966778122360	0.0	0.0	0.0	0.0	GO:0045739	GO Biological Processes	positive regulation of DNA repair	19_GO:0048518 positive regulation of biological process	-4656966778122360	5274135044642850	5.94192e+16	PARP1|PRKCG|PRKDC|XRCC1|RUVBL1|PNKP|TMEM161A|DMAP1|MMS19|RNF168	-3408779357803460	115.0	0.0	0.0
0	0	1	0	1	0.0	0.0	-2508144331557810	0.0	-2235739099449910	GO:0097120	GO Biological Processes	receptor localization to synapse	19_GO:0051179 localization	-4653689017970660	5665084915084910	5998536410863150	DLG4|KIF5A|RELN|SNAP25|CLSTN1|NSG1|VPS35|CACNG8|STX1B	-3.2044e+16	156.0	0.0	0.0
1	0	0	1	1	-2840693517006560	0.0	0.0	-4163375242407250	-2.96466e+16	R-HSA-9679506	Reactome Gene Sets	SARS-CoV Infections		-4647331326587430	217115975811628	4757388710645330	AP2A1|ATP1A3|CANX|COMT|CREBBP|GSK3B|STT3A|PDPK1|PSMC6|RPN2|SEC13|TUFM|VCP|YWHAG|NUP214|AAAS|CUL3|NUP155|SEC24C|POM121|PTGES3|YWHAQ|MAN1B1|GANAB|VPS41|CHMP4A|PIK3R4|SAR1B|CRBN|ANO10|NUP133|VPS11|ANO3|VPS16	-3.19859e+16	205.0	1.0	1.0
0	1	1	0	0	0.0	-4646026415800970	-2.86204e+16	0.0	0.0	GO:0090630	GO Biological Processes	activation of GTPase activity	19_GO:0065007 biological regulation	-4646026415800970	8338571822442790	6761030044314050	TBC1D5|APC2|TBC1D13|RALGAPB|TBC1D17|AGAP2|AGAP3	-3398183536937600	91.0	0.0	0.0
1	1	0	0	0	-4644916426278370	-3023734111810490	0.0	0.0	0.0	GO:0051236	GO Biological Processes	establishment of RNA localization	19_GO:0051179 localization	-4644916426278370	4760244963369960	5773700290071320	ATM|ATR|NCBP1|ATXN2|SEC13|AAAS|CKAP5|LRPPRC|DDX19A|NUP133|XPO5	-3.39762e+16	187.0	0.0	0.0
1	0	0	0	0	-4644769742111730	0.0	0.0	0.0	0.0	R-HSA-8852135	Reactome Gene Sets	Protein ubiquitination		-4644769742111730	6836347197106690	6369061747918310	PEX10|PRKDC|PEX2|HLTF|UBA1|VCP|USP5|USP9X	-3.39762e+16	37.0	0.0	0.0
1	0	0	1	0	-2.75917e+16	0.0	0.0	-4643179827715850	0.0	R-HSA-5689880	Reactome Gene Sets	Ub-specific processing proteases		-4643179827715850	5287412587412580	5.94329e+16	PSMA7|PSMC4|PSMC5|PSMC6|PSMD2|VDAC2|USP5|PSMF1|PSMD6|PSME3	-3.39718e+16	52.0	0.0	0.0
0	0	1	0	1	0.0	0.0	-3.87536e+16	0.0	-3937775017487100	GO:1901888	GO Biological Processes	regulation of cell junction assembly	19_GO:0050789 regulation of biological process	-4639679225017980	2.71783e+16	5000208083999830	APP|CHRNB2|DMTN|PTK2B|GPM6B|RAPGEF1|GRID2|NPHP1|NTRK2|PTPRD|SLIT1|THY1|NRXN1|RAPGEF2|CLSTN3|FAM107A|SLITRK3|CLSTN1|CUX2|VPS35|CAMSAP3|LRRTM1	-3191488388237990	206.0	1.0	1.0
1	0	0	1	0	-3.95616e+16	0.0	0.0	-4498629835038750	0.0	R-HSA-69278	Reactome Gene Sets	Cell Cycle, Mitotic		-4632071754286300	1.98278e+16	4654445406815800	CSNK2B|DYNC1H1|GSK3B|LMNB1|PAFAH1B1|PPP2R2A|PSMA7|PSMC4|PSMC5|PSMC6|PSMD1|PSMD2|PSMD3|RAB1A|RAB2A|RANGAP1|RFC1|SEC13|TUBB2A|VRK1|YWHAG|NUP214|AAAS|OFD1|USO1|CDC23|ZW10|PSMF1|NUP155|CKAP5|PSMD6|POM121|PSME3|TUBB4A|TUBGCP2|ORC3|CHMP4A|DYNC1LI1|NUP133|ANAPC1|CEP290|TUBGCP5	-3.18443e+16	129.0	0.0	0.0
0	1	1	0	0	0.0	-2.65871e+16	-3.50145e+16	0.0	0.0	GO:0046578	GO Biological Processes	regulation of Ras protein signal transduction	19_GO:0050896 response to stimulus	-4622680329638610	2873593797506840	5054390774333910	ARRB1|BCR|ARHGAP35|NF1|OPHN1|PSD|RIT2|CUL3|GBF1|SYNGAP1|SQSTM1|ADGRG1|ARFGEF1|IQSEC2|MCF2L|GIT1|DENND1A|DAB2IP|IQSEC3|TRIM67	-3.17613e+16	207.0	1.0	1.0
0	0	0	1	1	0.0	0.0	0.0	-2.5255e+16	-4.61758e+16	GO:0006457	GO Biological Processes	protein folding	19_GO:0009987 cellular process	-4.61758e+16	5250967932357580	5913377846891760	CALR|CANX|PDIA3|DNAJC3|HSP90B1|SACS|UGGT1|CCDC47|SIL1|DNAJC5	-3.37317e+16	110.0	0.0	0.0
0	0	0	0	1	0.0	0.0	0.0	0.0	-4614987240340780	GO:0006491	GO Biological Processes	N-glycan processing	19_GO:0008152 metabolic process	-4614987240340780	2.29992e+16	9217517015164740	MAN2A2|MAN1B1|GANAB|GNPTG	-3371257678557980	67.0	0.0	0.0
0	0	0	1	1	0.0	0.0	0.0	-2.54792e+16	-2533881376118050	GO:0048489	GO Biological Processes	synaptic vesicle transport	19_GO:0051179 localization	-4.61233e+16	64089849544395	6164092473672130	DNM1|TOR1A|KIF5A|SYNJ1|AP3D1|SNAP91|TMEM230|SPG11	-3.16632e+16	134.0	0.0	0.0
0	0	1	0	1	0.0	0.0	-2.56891e+16	0.0	-4609778463498400	hsa05033	KEGG Pathway	Nicotine addiction		-4609778463498400	1.43745e+16	7927630032600950	CACNA1A|GABRA3|GRIA2|GRIA3|GRIN1	-3.36673e+16	90.0	0.0	0.0
1	0	0	0	1	-4599719396788000	0.0	0.0	0.0	-3.51694e+16	GO:0030148	GO Biological Processes	sphingolipid biosynthetic process	19_GO:0008152 metabolic process	-4599719396788000	5842118818681310	6065309219133380	ABCA2|ASAH1|B4GALNT1|GBA1|SMPD1|ELOVL4|SPTLC1|ELOVL5|FA2H	-33580319758302	81.0	0.0	0.0
1	0	0	0	0	-4593483530897510	0.0	0.0	0.0	0.0	GO:0021915	GO Biological Processes	neural tube development	19_GO:0032502 developmental process	-4593483530897510	4699988698010840	5717671161322230	FOLR1|MTHFD1|OPA1|PSEN1|RPGRIP1L|IFT172|MKS1|NUP133|CC2D2A|TCTN1|ARL13B	-3352474695205740	22.0	0.0	0.0
0	0	1	0	0	0.0	0.0	-4.57057e+16	0.0	0.0	GO:0098598	GO Biological Processes	learned vocalization behavior or vocal learning	19_GO:0032501 multicellular organismal process	-4.57057e+16	480063492063492	1.17934e+16	NRXN1|NRXN2|SHANK3	-3330236235565030	63.0	0.0	0.0
0	0	1	0	0	0.0	0.0	-4.57057e+16	0.0	0.0	GO:0098814	GO Biological Processes	spontaneous synaptic transmission	19_GO:0050789 regulation of biological process	-4.57057e+16	480063492063492	1.17934e+16	RIMS2|NSG1|STX1B	-3330236235565030	156.0	0.0	0.0
0	0	1	0	0	0.0	0.0	-3720047759317800	0.0	0.0	GO:0050772	GO Biological Processes	positive regulation of axonogenesis	19_GO:0032502 developmental process	-4570360012394950	4174273095325720	549359674437923	CDH4|MEGF8|GDI1|L1CAM|MAP1B|MAPT|NRDC|NTRK2|PAFAH1B1|CDKL5|MAP3K13|RUFY3	-3129750568570770	38.0	0.0	0.0
0	1	0	0	1	0.0	-2726518900709950	0.0	0.0	-4449134497972960	R-HSA-109582	Reactome Gene Sets	Hemostasis		-4550847112987440	1915729198337890	4571695489618430	ACTB|APLP2|APP|ARRB1|ATP2A2|ATP2B1|ATP2B2|ATP2B3|KIF1A|CALM1|CAPZB|DGKB|DOCK3|GLG1|ITPR1|KIF3C|KIF5A|L1CAM|LAMP2|MAG|PDPK1|PIK3R1|PIK3R2|PRCP|PRKCG|PSAP|SLC8A2|SLC8A3|TSPAN7|TUBB2A|TUBB4A|KIF1C|PDE10A|MGLL|KIFAP3|ENDOD1|KIF1B|DOCK9|ABHD12|SCG3|CYB5R1|ABHD6|CHID1|CD99L2|SIRPA	-3.11291e+16	208.0	1.0	1.0
0	0	0	0	1	0.0	0.0	0.0	0.0	-4545702581784600	GO:1904377	GO Biological Processes	positive regulation of protein localization to cell periphery	19_GO:0051179 localization	-4545702581784600	1.01467e+16	7072230636431370	CLN3|LRP1|PDPK1|PRNP|RER1|ATP2C1	-3308352348165280	108.0	0.0	0.0
0	0	0	1	0	0.0	0.0	0.0	-4545647799942680	0.0	GO:1904292	GO Biological Processes	regulation of ERAD pathway	19_GO:0050896 response to stimulus	-4545647799942680	2.21568e+16	9031183888743800	ATXN3|BCAP31|UBQLN2|UBQLN1	-3308352348165280	142.0	0.0	0.0
1	1	0	0	0	-4542056226621570	-2.93586e+16	0.0	0.0	0.0	GO:0034655	GO Biological Processes	nucleobase-containing compound catabolic process	19_GO:0008152 metabolic process	-4542056226621570	3.52834e+16	5277155988335550	ACAT1|ABCD1|ATM|MLH1|NCBP1|PNP|PARN|RNH1|VCP|SKIC3|LRPPRC|EXOSC3|TRNT1|NBAS|ELAC2	-3.3051e+16	209.0	1.0	1.0
1	0	0	0	1	-2.23444e+16	0.0	0.0	0.0	-2886790438853720	GO:0032527	GO Biological Processes	protein exit from endoplasmic reticulum	19_GO:0051179 localization	-454164569219317	7402377622377620	6349656012970890	SEC13|SEL1L|HSP90B1|VCP|TECPR2|HM13|SYVN1	-3.1052e+16	210.0	1.0	1.0
1	0	0	0	0	-4.54123e+16	0.0	0.0	0.0	0.0	GO:0060972	GO Biological Processes	left/right pattern formation	19_GO:0032502 developmental process	-4.54123e+16	5114312770562770	5808806736356470	AP1B1|FOLR1|PSEN1|OFD1|RPGRIP1L|IFT172|AHI1|MKS1|CC2D2A|ARL13B	-3304604565613060	22.0	0.0	0.0
1	0	0	0	0	-4534678491711790	0.0	0.0	0.0	0.0	GO:0019216	GO Biological Processes	regulation of lipid metabolic process	19_GO:0008152 metabolic process	-4534678491711790	3.20573e+16	5147930456388730	ABCA2|ABCA3|ABCD1|ASAH1|CLCN2|MTOR|PSAP|PLA2G6|RUBCN|STUB1|PIBF1|NPC2|SCAP|PIK3R4|ELOVL5|PANK2|DNAJC19	-3.29839e+16	211.0	1.0	1.0
1	0	0	0	1	-3.31193e+16	0.0	0.0	0.0	-3.99194e+16	GO:1905165	GO Biological Processes	regulation of lysosomal protein catabolic process	19_GO:0008152 metabolic process	-4532993636102390	1.20168e+16	7245894105572670	GBA1|LRP1|ATP13A2|VPS35|MFSD8	-3.09878e+16	212.0	1.0	1.0
0	0	0	0	1	0.0	0.0	0.0	0.0	-3.3849e+16	GO:0071248	GO Biological Processes	cellular response to metal ion	19_GO:0050896 response to stimulus	-4.52991e+16	2.74841e+16	4943481181915540	ADD1|PARP1|APP|CALR|DLG4|DMTN|GLRA1|HPCA|KCNJ10|PRNP|LGMN|SMPD1|TH|ABCB6|SYT11|NCSTN|ATP13A2|BACE1|SMPD3|SLC25A23|SYT3	-3.09623e+16	53.0	0.0	0.0
0	0	0	1	1	0.0	0.0	0.0	-2.98217e+16	-2.11581e+16	GO:0035967	GO Biological Processes	cellular response to topologically incorrect protein	19_GO:0050896 response to stimulus	-4528588238304880	3.86159e+16	5360462033510340	AMFR|ATF6B|TOR1A|ATXN3|EIF2AK2|TMBIM6|VCP|WFS1|CUL3|STUB1|UGGT1|ERMP1|DAB2IP	-3095430108080690	148.0	0.0	0.0
1	0	0	0	0	-4528543309066480	0.0	0.0	0.0	0.0	GO:0002562	GO Biological Processes	somatic diversification of immune receptors via germline recombination within a single locus	19_GO:0002376 immune system process	-4528543309066480	9879355400696860	6976229914853650	ATM|MLH1|PRKDC|XRCC4|EXOSC3|RNF168	-3.29326e+16	85.0	0.0	0.0
1	0	0	0	0	-4528543309066480	0.0	0.0	0.0	0.0	GO:0016444	GO Biological Processes	somatic cell DNA recombination	19_GO:0008152 metabolic process	-4528543309066480	9879355400696860	6976229914853650	ATM|MLH1|PRKDC|XRCC4|EXOSC3|RNF168	-3.29326e+16	85.0	0.0	0.0
0	0	0	0	1	0.0	0.0	0.0	0.0	-4526190200517850	R-HSA-8849932	Reactome Gene Sets	Synaptic adhesion-like molecules		-4526190200517850	2190403766069160	89750792627784	GRIA3|GRIN1|PTPRD|RTN3	-3.29187e+16	90.0	0.0	0.0
0	0	0	0	1	0.0	0.0	0.0	0.0	-4526190200517850	R-HSA-901032	Reactome Gene Sets	ER Quality Control Compartment (ERQC)		-4526190200517850	2190403766069160	89750792627784	SEL1L|MAN1B1|UGGT1|SYVN1	-3.29187e+16	67.0	0.0	0.0
1	0	0	0	0	-3582792369217810	0.0	0.0	0.0	0.0	GO:0009266	GO Biological Processes	response to temperature stimulus	19_GO:0050896 response to stimulus	-452059455322058	2920373231419740	5007807925602530	ATP2B1|EIF2B1|MTOR|GRIK2|LIPA|MAPT|ATXN3|NF1|DNAJC3|VCP|EIF2B4|EIF2B3|EIF2B2|EIF2B5|STUB1|SLC12A5|ANO3|TMEM135|CLPB	-3.08897e+16	77.0	0.0	0.0
1	1	0	0	1	-4338367820661870	-2.21885e+16	0.0	0.0	-2885158508885740	R-HSA-9694516	Reactome Gene Sets	SARS-CoV-2 Infection		-4518841769465680	2387293308697990	4779920566292410	CANX|CREBBP|GSK3B|STT3A|PDPK1|RPN2|SEC13|TUFM|VCP|YWHAG|NUP214|AAAS|NUP155|SEC24C|POM121|YWHAQ|MAN1B1|GANAB|VPS41|CHMP4A|PIK3R4|SAR1B|ANO10|NUP133|VPS11|ANO3|VPS16	-3.08897e+16	205.0	0.0	0.0
0	0	1	0	0	0.0	0.0	-3.2641e+16	0.0	0.0	R-HSA-9013405	Reactome Gene Sets	RHOD GTPase cycle		-4518452080139720	4895752395752390	568114170815899	CAPZB|ARHGAP35|LMNB1|PIK3R1|PIK3R2|RAB7A|ANKFY1|PAK6|PAK5|ARHGAP39	-3.08897e+16	74.0	0.0	0.0
1	0	0	0	1	-4514979708757980	0.0	0.0	0.0	-375865412136375	GO:0046479	GO Biological Processes	glycosphingolipid catabolic process	19_GO:0008152 metabolic process	-4514979708757980	2.0772e+16	8743151371922920	GALC|GBA1|HEXA|HEXB	-3283361389872280	49.0	0.0	0.0
1	0	0	0	0	-4514979708757980	0.0	0.0	0.0	0.0	R-HSA-2046104	Reactome Gene Sets	alpha-linolenic (omega3) and linoleic (omega6) acid metabolism		-4514979708757980	2.0772e+16	8743151371922920	ACAA1|ABCD1|HSD17B4|ELOVL5	-3283361389872280	140.0	0.0	0.0
1	0	0	0	0	-4514979708757980	0.0	0.0	0.0	0.0	R-HSA-2046106	Reactome Gene Sets	alpha-linolenic acid (ALA) metabolism		-4514979708757980	2.0772e+16	8743151371922920	ACAA1|ABCD1|HSD17B4|ELOVL5	-3283361389872280	140.0	0.0	0.0
1	0	0	0	0	-3.86592e+16	0.0	0.0	0.0	0.0	GO:0032212	GO Biological Processes	positive regulation of telomere maintenance via telomerase	19_GO:0048518 positive regulation of biological process	-4510414765266330	6.22049e+16	6038845708764600	ATM|ATR|DKC1|PARN|TNKS|CCT7|PNKP|CCT5	-3084063077268890	118.0	0.0	0.0
1	0	0	0	0	-4500590068406500	0.0	0.0	0.0	0.0	CORUM:6482	CORUM	CUL4B-DDB1-DTL-CSN complex		-4500590068406500	4.05054e+16	1.08325e+16	DDB1|GPS1|CUL4B	-3270296829059520	164.0	0.0	0.0
1	0	0	0	0	-4500590068406500	0.0	0.0	0.0	0.0	CORUM:994	CORUM	GAA1-GPI8-PIGT-PIG-PIGS complex		-4500590068406500	4.05054e+16	1.08325e+16	GPAA1|PIGT|PIGS	-3270296829059520	213.0	1.0	1.0
1	0	0	0	0	-4500590068406500	0.0	0.0	0.0	0.0	R-HSA-8866376	Reactome Gene Sets	Reelin signalling pathway		-4500590068406500	4.05054e+16	1.08325e+16	DAB1|RELN|VLDLR	-3270296829059520	109.0	0.0	0.0
1	0	0	1	0	-4493042431659230	0.0	0.0	-3278585007214130	0.0	GO:0006839	GO Biological Processes	mitochondrial transport	19_GO:0051179 localization	-4493042431659230	458393959435626	5608378218595920	BCS1L|PSEN1|SPG7|AIFM1|PMPCB|PITRM1|PMPCA|SAMM50|SLC25A46|SFXN4|DNAJC19	-3.26374e+16	116.0	0.0	0.0
0	0	1	0	0	0.0	0.0	-2.68315e+16	0.0	0.0	GO:0046777	GO Biological Processes	protein autophosphorylation	19_GO:0008152 metabolic process	-4487412392490720	2.81245e+16	4942642056396860	ATM|ATR|DDR1|PTK2B|MTOR|GSK3B|MAP3K10|NTRK2|PDPK1|PRKCG|EIF2AK2|CDKL5|TAF1|THY1|VRK1|MAP3K13|ATG13|CAMKK2|ATP13A2|MINK1	-3062098445684540	143.0	0.0	0.0
0	0	1	0	0	0.0	0.0	-2.13537e+16	0.0	0.0	GO:2000058	GO Biological Processes	regulation of ubiquitin-dependent protein catabolic process	19_GO:0008152 metabolic process	-4485485185461710	2.90349e+16	49782789717538	PTK2B|FHIT|GBA1|GSK3B|MAP1A|PSEN1|TAF1|UBE3A|VCP|USP5|USP9X|BCAP31|STUB1|ZER1|UFL1|CCDC22|UBQLN2|UBQLN1|TRIM67	-3.06069e+16	46.0	0.0	0.0
1	0	0	0	0	-4484977904600910	0.0	0.0	0.0	0.0	GO:0009855	GO Biological Processes	determination of bilateral symmetry	19_GO:0032502 developmental process	-4484977904600910	5037979744136460	5.74425e+16	AP1B1|FOLR1|PSEN1|OFD1|RPGRIP1L|IFT172|AHI1|MKS1|CC2D2A|ARL13B	-3256335349422440	22.0	0.0	0.0
0	1	0	0	1	0.0	-4224130935978010	0.0	0.0	-238818797901604	GO:0045936	GO Biological Processes	negative regulation of phosphate metabolic process	19_GO:0048519 negative regulation of biological process	-4478384613487710	2.13e+16	4.63495e+16	ABCA2|ADAR|PARP1|CALM1|DMTN|GBA1|GSK3B|HPCA|LRP1|MAPT|NF1|PDPK1|PRKDC|DNAJC3|PRNP|PSEN1|SH3GL2|SLC8A3|SMPD1|THY1|UCHL1|WARS1|YWHAG|RUBCN|RASSF2|PIBF1|PWP1|DBNDD1|PIP4K2C|SRCIN1|PPP1R1B|SIRPA|DAB2IP|C9orf72	-3.05462e+16	214.0	1.0	1.0
0	0	0	1	0	0.0	0.0	0.0	-4477540796333390	0.0	GO:0006584	GO Biological Processes	catecholamine metabolic process	19_GO:0008152 metabolic process	-4477540796333390	1.35259e+16	7653995257228920	DDC|GCH1|HPRT1|SLC6A3|TH	-3251927566919520	86.0	0.0	0.0
0	0	0	1	0	0.0	0.0	0.0	-4477540796333390	0.0	GO:0009712	GO Biological Processes	catechol-containing compound metabolic process	19_GO:0008152 metabolic process	-4477540796333390	1.35259e+16	7653995257228920	DDC|GCH1|HPRT1|SLC6A3|TH	-3251927566919520	86.0	0.0	0.0
1	0	0	1	0	-4270018762399390	0.0	0.0	-4477287457323980	0.0	GO:0140053	GO Biological Processes	mitochondrial gene expression	19_GO:0008152 metabolic process	-4477287457323980	6.55341e+16	6176760701251080	GARS1|TUFM|TRNT1|IARS2|MRPS22|MRPS35|MRPL9|GFM1	-3251927566919520	215.0	1.0	1.0
0	0	0	1	0	0.0	0.0	0.0	-4477287457323980	0.0	R-HSA-5621481	Reactome Gene Sets	C-type lectin receptors (CLRs)		-4477287457323980	6.55341e+16	6176760701251080	PSMA7|PSMC4|PSMC5|PSMC6|PSMD2|PSMF1|PSMD6|PSME3	-3251927566919520	52.0	0.0	0.0
1	0	0	1	0	-2.88618e+16	0.0	0.0	-4477287457323980	0.0	R-HSA-68867	Reactome Gene Sets	Assembly of the pre-replicative complex		-4477287457323980	6.55341e+16	6176760701251080	PSMA7|PSMC4|PSMC5|PSMC6|PSMD2|PSMF1|PSMD6|PSME3	-3251927566919520	52.0	0.0	0.0
1	0	0	1	1	-2416396681735410	0.0	0.0	-250341606677084	-4473574574672960	R-HSA-9772573	Reactome Gene Sets	Late SARS-CoV-2 Infection Events		-4473574574672960	9856816947311240	6.94828e+16	CANX|STT3A|RPN2|MAN1B1|GANAB|ANO3	-3.24887e+16	65.0	0.0	0.0
0	1	1	0	0	0.0	-4467935033726670	-3117702560992600	0.0	0.0	GO:1903859	GO Biological Processes	regulation of dendrite extension	19_GO:0040007 growth	-4467935033726670	2.1442e+16	886470765628918	RIMS2|SLC23A2|RIMS1|UNC13A	-3244922766905800	202.0	0.0	0.0
0	0	0	1	0	0.0	0.0	0.0	-446766738767325	0.0	CORUM:2715	CORUM	Ubiquitin E3 ligase (CSN1, CSN8, HRT1, SKP1, SKP2, CUL1, CUL2, CUL3)		-446766738767325	4.36212e+16	1.1227e+16	CUL3|CUL2|COPS8	-3244922766905800	216.0	1.0	1.0
0	0	0	1	0	0.0	0.0	0.0	-4461435781922140	0.0	CORUM:181	CORUM	26S proteasome		-4461435781922140	2114965034965030	8803828589948020	PSMA7|PSMC4|PSMC5|PSMC6	-3.24063e+16	52.0	0.0	0.0
0	1	0	0	1	0.0	-4214342681546760	0.0	0.0	-2.38104e+16	GO:0010563	GO Biological Processes	negative regulation of phosphorus metabolic process	19_GO:0048519 negative regulation of biological process	-4457672545808060	2.12496e+16	4619840643791570	ABCA2|ADAR|PARP1|CALM1|DMTN|GBA1|GSK3B|HPCA|LRP1|MAPT|NF1|PDPK1|PRKDC|DNAJC3|PRNP|PSEN1|SH3GL2|SLC8A3|SMPD1|THY1|UCHL1|WARS1|YWHAG|RUBCN|RASSF2|PIBF1|PWP1|DBNDD1|PIP4K2C|SRCIN1|PPP1R1B|SIRPA|DAB2IP|C9orf72	-3036843453633180	214.0	0.0	0.0
0	0	0	1	0	0.0	0.0	0.0	-3327076861727140	0.0	GO:0019318	GO Biological Processes	hexose metabolic process	19_GO:0008152 metabolic process	-4.45752e+16	2.99288e+16	4995541562314830	DLAT|GLB1|KCNJ11|LIPA|MAN2A2|MAN2B1|MDH2|PC|PDHA1|PDHB|PMM2|SLC25A11|WDTC1|SLC39A14|G6PC3|BRAT1|FOXK1|HECTD4	-3036843453633180	120.0	0.0	0.0
1	0	0	0	0	-4457242817905420	0.0	0.0	0.0	0.0	GO:0009799	GO Biological Processes	specification of symmetry	19_GO:0032502 developmental process	-4457242817905420	5000661375661370	5712457351225110	AP1B1|FOLR1|PSEN1|OFD1|RPGRIP1L|IFT172|AHI1|MKS1|CC2D2A|ARL13B	-3.23708e+16	22.0	0.0	0.0
1	0	0	1	1	-2.21641e+16	0.0	0.0	-2334648191002480	-2317116907671250	GO:0070972	GO Biological Processes	protein localization to endoplasmic reticulum	19_GO:0051179 localization	-445434940090473	4067240451855830	5377930849240210	ANK2|GRIK5|SRP54|SRPRA|GBF1|GPAA1|BCAP31|RER1|CHMP4A|SEC61A2|BCAP29|MIA3	-3034187287724980	217.0	1.0	1.0
0	1	1	0	0	0.0	-2313503304870390	-2.40579e+16	0.0	0.0	GO:0010720	GO Biological Processes	positive regulation of cell development	19_GO:0032502 developmental process	-4.43637e+16	2.09343e+16	4591550805651540	ACTB|ADD1|CDH4|DLG4|MEGF8|FOXG1|MTOR|GDI1|GFAP|L1CAM|MAG|MAP1B|MAPT|MECP2|PNP|NRDC|NTRK2|PAFAH1B1|PRKDC|RELN|PTPRD|CDKL5|SYNJ1|AP3D1|NEURL1|MAP3K13|RUFY3|CUX2|UFL1|NPTN|ACTL6B|GJC2|TBC1D24|ARID1B|SHANK3	-3020788739149140	38.0	0.0	0.0
0	0	1	0	0	0.0	0.0	-4425566024070900	0.0	0.0	GO:0015833	GO Biological Processes	peptide transport	19_GO:0051179 localization	-4425566024070900	9709149277688600	6.88029e+16	CPE|PTPRN|PTPRN2|RIMS2|CPLX1|SMPD3	-3.20959e+16	161.0	0.0	0.0
1	0	0	1	0	-2627139779526600	0.0	0.0	-3860476919665190	0.0	GO:0042147	GO Biological Processes	retrograde transport, endosome to Golgi	19_GO:0051179 localization	-4.42415e+16	3776723276723270	525977280968337	ARL1|CLN5|CLTC|RAB6A|RAB7A|GBF1|TBC1D5|ERC1|ANKFY1|VPS35|TBC1D23|TBC1D17|WASHC2A	-3.00959e+16	54.0	0.0	0.0
1	0	1	1	0	-2185936758290300	0.0	-3117702560992600	-2.85059e+16	0.0	GO:0034643	GO Biological Processes	establishment of mitochondrion localization, microtubule-mediated	19_GO:0051179 localization	-4419812379726770	7117670790747710	6.18755e+16	MAP1B|MAPT|OPA1|UCHL1|LRPPRC|SYBU|ACTR10	-3.00727e+16	196.0	0.0	0.0
1	0	1	1	0	-2185936758290300	0.0	-3117702560992600	-2.85059e+16	0.0	GO:0047497	GO Biological Processes	mitochondrion transport along microtubule	19_GO:0051179 localization	-4419812379726770	7117670790747710	6.18755e+16	MAP1B|MAPT|OPA1|UCHL1|LRPPRC|SYBU|ACTR10	-3.00727e+16	196.0	0.0	0.0
0	0	0	0	1	0.0	0.0	0.0	0.0	-4.40374e+16	GO:0015807	GO Biological Processes	L-amino acid transport	19_GO:0051179 localization	-4.40374e+16	9583016476552590	6829224609940970	CLN3|CLN8|PSEN1|SLC6A5|ARL6IP5|SERINC3	-3.1884e+16	83.0	0.0	0.0
0	1	0	0	1	0.0	-4402045685191940	0.0	0.0	-3.00447e+16	GO:0035304	GO Biological Processes	regulation of protein dephosphorylation	19_GO:0008152 metabolic process	-4402045685191940	9611949785475920	6838382307413390	CALM1|HTT|SMPD1|PPP6R1|PPP6R3|PPP1R1B	-3.18735e+16	218.0	1.0	1.0
1	1	0	1	0	-2.35835e+16	-2382936923795050	0.0	-2.16565e+16	0.0	GO:0008347	GO Biological Processes	glial cell migration	19_GO:0032502 developmental process	-439963208796661	5287412587412580	5.70669e+16	DAB1|FOXG1|HEXB|NF1|PAFAH1B1|RELN|ADGRG1|RTN4|DAB2IP	-2989593847706640	6.0	0.0	0.0
0	1	1	0	1	0.0	-2382936923795050	-2.42272e+16	0.0	-2.15199e+16	GO:0035249	GO Biological Processes	synaptic transmission, glutamatergic	19_GO:0050789 regulation of biological process	-439963208796661	5287412587412580	5.70669e+16	GRIA2|GRIA3|GRID2|GRIK2|GRIK5|NF1|TNR|CLSTN3|UNC13A	-2989593847706640	90.0	0.0	0.0
0	1	1	0	1	0.0	-2594472171788290	-3641028407633370	0.0	-2.29748e+16	GO:1990138	GO Biological Processes	neuron projection extension	19_GO:0040007 growth	-4397849825379450	4015756395503230	5321537057512120	DDR1|CDH4|MAP1B|SH3GL2|SLIT1|TNR|USP9X|SLC9A6|CYFIP2|PAK6|SPG11|C9orf72	-2988311636391660	219.0	1.0	1.0
1	1	0	0	0	-4395698217070880	-2.15066e+16	0.0	0.0	0.0	GO:0006401	GO Biological Processes	RNA catabolic process	19_GO:0008152 metabolic process	-4395698217070880	4.47348e+16	5502590961506400	ATM|MLH1|NCBP1|PARN|RNH1|SKIC3|LRPPRC|EXOSC3|TRNT1|NBAS|ELAC2	-3181954621954880	209.0	0.0	0.0
0	0	1	0	1	0.0	0.0	-4.39167e+16	0.0	-4012821265903180	GO:1903779	GO Biological Processes	regulation of cardiac conduction	19_GO:0032501 multicellular organismal process	-4.39167e+16	2057414965986390	8664807688071700	ANK2|ATP2B2|SLC8A2|SLC8A3	-3.17909e+16	97.0	0.0	0.0
1	1	0	0	0	-3.09126e+16	-430949058508015	0.0	0.0	0.0	GO:0051168	GO Biological Processes	nuclear export	19_GO:0051179 localization	-4391064264579950	320449247721975	5032742824810640	CALR|CSE1L|HSPA9|NCBP1|RANGAP1|ATXN1|NUP214|NUP155|POM121|SDAD1|DDX19A|NUP133|XPO5|XPO4|STRADA|POM121C	-298202555176212	88.0	0.0	0.0
0	0	1	0	1	0.0	0.0	-4355795528520710	0.0	-2841796998640080	R-HSA-5578775	Reactome Gene Sets	Ion homeostasis		-4.3756e+16	4720904095904090	5525915909867060	ATP1A3|ATP2A2|ATP2B1|ATP2B2|ATP2B3|CALM1|ITPR1|KCNJ11|SLC8A2|SLC8A3	-2.96756e+16	84.0	0.0	0.0
1	0	0	0	0	-4374621031568610	0.0	0.0	0.0	0.0	GO:0009063	GO Biological Processes	amino acid catabolic process	19_GO:0008152 metabolic process	-4374621031568610	5473696911196910	579001008580048	ACAT1|AUH|BCKDHB|DLD|ECHS1|OTC|ALDH5A1|HIBCH|MCCC1	-3163389896302330	73.0	0.0	0.0
1	0	0	1	0	-4374621031568610	0.0	0.0	-2558698858653600	0.0	R-HSA-5696398	Reactome Gene Sets	Nucleotide Excision Repair		-4374621031568610	5473696911196910	579001008580048	PARP1|DDB1|ERCC4|GPS1|RFC1|XRCC1|CUL4B|RUVBL1|COPS5	-3163389896302330	164.0	0.0	0.0
1	0	0	0	1	-4373961129015260	0.0	0.0	0.0	-3.65672e+16	GO:0046512	GO Biological Processes	sphingosine biosynthetic process	19_GO:0008152 metabolic process	-4373961129015260	1928826530612240	8392472300865240	ABCA2|ASAH1|GBA1|SPTLC1	-3163389896302330	81.0	0.0	0.0
1	0	0	0	1	-4373961129015260	0.0	0.0	0.0	-3.65672e+16	GO:0046520	GO Biological Processes	sphingoid biosynthetic process	19_GO:0008152 metabolic process	-4373961129015260	1928826530612240	8392472300865240	ABCA2|ASAH1|GBA1|SPTLC1	-3163389896302330	81.0	0.0	0.0
1	0	0	0	0	-4348940713627480	0.0	0.0	0.0	0.0	hsa03410	KEGG Pathway	Base excision repair		-4348940713627480	9205762987012980	6679043845564660	PARP1|RFC1|XRCC1|PNKP|APTX|ADPRS	-3.14108e+16	220.0	1.0	1.0
0	1	1	0	0	0.0	-3.25657e+16	-2.66447e+16	0.0	0.0	GO:0007264	GO Biological Processes	small GTPase mediated signal transduction	19_GO:0050896 response to stimulus	-4344418514359460	2.47847e+16	4710196947092670	ARHGDIG|BCR|DAB1|DOCK3|GDI1|RAPGEF1|ARHGAP35|LIPA|NF1|RIT2|USO1|SYNGAP1|ADGRG1|RAPGEF2|RUNDC3A|YWHAQ|NISCH|DOCK9|KNDC1|ARHGAP33|RASGEF1C|KSR2|RAB15|CCDC88C	-2.93836e+16	221.0	1.0	1.0
0	0	0	0	1	0.0	0.0	0.0	0.0	-4338712265558080	R-HSA-8957275	Reactome Gene Sets	Post-translational protein phosphorylation		-4338712265558080	745345725954091	6292580267016440	ADAM10|APLP2|APP|CDH2|DNAJC3|HSP90B1|TGOLN2	-3131604073522090	222.0	1.0	1.0
0	0	0	0	1	0.0	0.0	0.0	0.0	-2.53124e+16	GO:0006835	GO Biological Processes	dicarboxylic acid transport	19_GO:0051179 localization	-4338319189615960	427658371040724	5363198129080340	APBA1|CLN8|FOLR1|GFAP|KCNJ10|NF1|NTRK2|PSEN1|SLC25A11|ARL6IP5|PRAF2	-293325574008561	83.0	0.0	0.0
1	0	0	0	0	-3.28822e+16	0.0	0.0	0.0	0.0	R-HSA-204005	Reactome Gene Sets	COPII-mediated vesicle transport		-4338319189615960	427658371040724	5363198129080340	FOLR1|RAB1A|SEC13|USO1|NAPG|GOSR2|SEC24C|PPP6R1|SAR1B|PPP6R3|TRAPPC9	-293325574008561	131.0	0.0	0.0
1	1	0	1	0	-4269441257056890	-2.77736e+16	0.0	-2.25855e+16	0.0	GO:1901361	GO Biological Processes	organic cyclic compound catabolic process	19_GO:0008152 metabolic process	-4325363182991030	2179651465555720	45637675410589	ACAA1|ACAT1|ABCD1|ATM|COMT|CYP27A1|DNASE2|FHIT|GOT2|HPRT1|MLH1|ALDH6A1|NCBP1|PNP|PARN|QDPR|RNH1|SLC6A3|VCP|SUCLA2|SKIC3|CTIF|LRPPRC|PDE10A|CNOT1|EXOSC3|TRNT1|NBAS|SAMD4B|ELAC2|FITM2	-2921287889704740	209.0	0.0	0.0
0	1	1	0	1	0.0	-2.33968e+16	-2.39e+16	0.0	-287460785739119	R-HSA-442755	Reactome Gene Sets	Activation of NMDA receptors and postsynaptic events		-4322843650278900	3695503421309870	5161898418810710	APBA1|CALM1|DLG4|GRIA2|GRIA3|GRIN1|MAPT|PDPK1|RPS6KA3|TUBB2A|TUBB4A|CAMKK2|GIT1	-2.91926e+16	20.0	0.0	0.0
0	1	1	0	1	0.0	-2355925663446390	-2395637217163180	0.0	-3164643369507690	GO:0008038	GO Biological Processes	neuron recognition	19_GO:0032502 developmental process	-4319806415772020	5172468835512310	561515668768635	APP|MEGF8|FOXG1|GAP43|ARHGAP35|NRCAM|NTM|RTN4|CNTN4	-2.9177e+16	223.0	1.0	1.0
0	0	0	0	1	0.0	0.0	0.0	0.0	-3164643369507690	GO:0008089	GO Biological Processes	anterograde axonal transport	19_GO:0051179 localization	-4319806415772020	5172468835512310	561515668768635	KIF1A|KIF5A|MAP1A|SPG7|AP3D1|KIF1C|KIF1B|MAPK8IP3|ARL8B	-2.9177e+16	55.0	0.0	0.0
0	1	1	0	0	0.0	-3.47865e+16	-3.53265e+16	0.0	0.0	GO:2000300	GO Biological Processes	regulation of synaptic vesicle exocytosis	19_GO:0051179 localization	-4319806415772020	5172468835512310	561515668768635	ATP2A2|SEPTIN5|PRKCG|SYN1|RIMS2|RIMS3|RIMS1|GIT1|RIMS4	-2.9177e+16	25.0	0.0	0.0
1	0	0	1	0	-2.8918e+16	0.0	0.0	-4319140941183380	0.0	GO:0032543	GO Biological Processes	mitochondrial translation	19_GO:0008152 metabolic process	-4319140941183380	7402377622377620	6264170365881930	GARS1|TUFM|IARS2|MRPS22|MRPS35|MRPL9|GFM1	-3.11391e+16	215.0	0.0	0.0
0	1	1	0	0	0.0	-2.09593e+16	-4318366966242250	0.0	0.0	GO:0051017	GO Biological Processes	actin filament bundle assembly	19_GO:0009987 cellular process	-4318366966242250	1.26332e+16	7350958954388100	ADD2|DPYSL3|DMTN|PTK2B|FHDC1	-3.11376e+16	36.0	0.0	0.0
0	0	0	1	0	0.0	0.0	0.0	-3.59655e+16	0.0	GO:1905898	GO Biological Processes	positive regulation of response to endoplasmic reticulum stress	19_GO:0048518 positive regulation of biological process	-4.31772e+16	5874902874902870	5802767687073020	ATXN3|PIK3R1|WFS1|BCAP31|SERINC3|UBQLN2|UBQLN1|DAB2IP	-2916599316033660	142.0	0.0	0.0
0	0	1	0	0	0.0	0.0	-4159115057224760	0.0	0.0	GO:0072578	GO Biological Processes	neurotransmitter-gated ion channel clustering	19_GO:0051179 localization	-4312683861761200	1.10154e+16	6880282887579190	DLG4|GLRB|RELN|SLITRK3|SHANK3	-2.91205e+16	63.0	0.0	0.0
0	0	1	1	0	0.0	0.0	-3.79253e+16	-2014229061903180	0.0	GO:0051051	GO Biological Processes	negative regulation of transport	19_GO:0051179 localization	-4309323097465790	2016848100353250	4476068629007820	ABCA2|BCR|CALM1|DLG4|DMTN|PTK2B|GDI1|GPM6B|KCNJ11|MAP1B|NF1|RANGAP1|ATXN2|ABCC8|TMBIM6|RAB7A|KLF7|RUBCN|ATP9A|ARL6IP5|YWHAQ|HRH3|HECW1|SYT11|UBQLN2|UBQLN1|CRBN|CAB39|VPS35|THADA|SRCIN1|NDFIP1|NDUFAF2|STX1B|UBR3|SIRPA|LRRTM1	-2909469437133950	224.0	1.0	1.0
0	0	1	0	1	0.0	0.0	-429013371918847	0.0	-4265748657725390	GO:1990778	GO Biological Processes	protein localization to cell periphery	19_GO:0051179 localization	-4309125641600190	2523039201462430	4.7067e+16	ANK2|ATP6AP1|CDH2|CLN3|DLG4|PALM|SNAP25|SPTBN1|STXBP1|RAB7A|RAPGEF2|ARL6IP5|CLSTN1|NFASC|PACS2|NSG1|PACS1|VPS35|SCN3B|STX1B|RAB3C|TTC7B|ARL13B	-2909469437133950	26.0	0.0	0.0
1	0	0	0	1	-3708316855779040	0.0	0.0	0.0	-3.85836e+16	GO:0046513	GO Biological Processes	ceramide biosynthetic process	19_GO:0008152 metabolic process	-4306675361084030	4638081217028580	5451032771588840	ASAH1|CLN8|B4GALNT1|GBA1|SMPD1|SPTLC1|ST8SIA3|FA2H|TLCD3B|SPTSSB	-2908482250023690	81.0	0.0	0.0
0	0	0	1	0	0.0	0.0	0.0	-4305154266262250	0.0	GO:0006882	GO Biological Processes	intracellular zinc ion homeostasis	19_GO:0042592 homeostatic process	-4305154266262250	1.93872e+16	839127261107913	ATP7B|ATP13A2|SLC39A14|SLC30A10	-3.10334e+16	195.0	0.0	0.0
0	0	1	0	0	0.0	0.0	-4.30408e+16	0.0	0.0	hsa04020	KEGG Pathway	Calcium signaling pathway		-4.30408e+16	5400714285714280	5723408042756370	ATP2B2|CACNA1A|PTK2B|NTRK2|SLC8A2|SLC8A3|CACNA1I|PLCB1|CAMK1D	-3.10258e+16	97.0	0.0	0.0
1	0	0	1	0	-2.13952e+16	0.0	0.0	-2.80219e+16	0.0	GO:0021801	GO Biological Processes	cerebral cortex radial glia-guided migration	19_GO:0032502 developmental process	-4303856600312380	6854053354053350	6033812891076450	DAB1|FOXG1|PAFAH1B1|RELN|ADGRG1|RTN4|DAB2IP	-2.90712e+16	6.0	0.0	0.0
1	0	0	1	0	-2.13952e+16	0.0	0.0	-2.80219e+16	0.0	GO:0022030	GO Biological Processes	telencephalon glial cell migration	19_GO:0032502 developmental process	-4303856600312380	6854053354053350	6033812891076450	DAB1|FOXG1|PAFAH1B1|RELN|ADGRG1|RTN4|DAB2IP	-2.90712e+16	6.0	0.0	0.0
0	0	0	1	0	0.0	0.0	0.0	-4294347485344980	0.0	GO:0006107	GO Biological Processes	oxaloacetate metabolic process	19_GO:0008152 metabolic process	-4294347485344980	3.87744e+16	1.0554e+16	ACLY|GOT2|MDH2	-3.09408e+16	123.0	0.0	0.0
0	0	0	1	0	0.0	0.0	0.0	-4294347485344980	0.0	GO:1903069	GO Biological Processes	regulation of ER-associated ubiquitin-dependent protein catabolic process	19_GO:0050896 response to stimulus	-4294347485344980	3.87744e+16	1.0554e+16	BCAP31|UBQLN2|UBQLN1	-3.09408e+16	142.0	0.0	0.0
1	0	0	0	0	-4292216605619210	0.0	0.0	0.0	0.0	WP3878	WikiPathways	ATM signaling in development and disease		-4292216605619210	9001190476190470	6586232294740550	ATM|ATR|MTOR|MRE11|PRKDC|RNF168	-3.09319e+16	85.0	0.0	0.0
1	0	0	0	0	-4292216605619210	0.0	0.0	0.0	0.0	hsa02010	KEGG Pathway	ABC transporters		-4292216605619210	9001190476190470	6586232294740550	ABCA2|ABCA3|ABCB7|ABCD1|ABCB6|ABCB8	-3.09319e+16	189.0	0.0	0.0
0	0	1	0	0	0.0	0.0	-4291569573733800	0.0	0.0	GO:0046879	GO Biological Processes	hormone secretion	19_GO:0051179 localization	-4291569573733800	9192705167173250	6.65217e+16	CPE|PTPRN|PTPRN2|RIMS2|CPLX1|SMPD3	-3.09285e+16	161.0	0.0	0.0
1	0	0	0	0	-2.88611e+16	0.0	0.0	0.0	0.0	GO:0006446	GO Biological Processes	regulation of translational initiation	19_GO:0008152 metabolic process	-4287726143610360	3.9166e+16	5211483315343260	DDX1|EIF4G2|FECH|MTOR|NCBP1|EIF2AK2|DNAJC3|EIF2B2|EIF2B5|CTIF|DHX29|PAIP2B	-2.89211e+16	104.0	0.0	0.0
1	1	0	0	0	-3.4001e+16	-3127426696208670	0.0	0.0	0.0	R-HSA-162587	Reactome Gene Sets	HIV Life Cycle		-4287388750715940	3016309194161540	489195038058271	KPNA1|NCBP1|POLR2A|RANGAP1|SEC13|TAF1|TBP|XRCC4|NUP214|AAAS|CTDP1|NUP155|POM121|CHMP4A|NELFCD|CHMP5|NUP133	-2.89211e+16	88.0	0.0	0.0
0	1	0	0	1	0.0	-4287244271659860	0.0	0.0	-3.45983e+16	GO:0031400	GO Biological Processes	negative regulation of protein modification process	19_GO:0048519 negative regulation of biological process	-4287244271659860	3.75125e+16	5181622781305410	ADAR|ARRB1|CALM1|NF1|PDPK1|PRNP|SMPD1|TPPP|SRCIN1|PPP1R1B|SIRPA|DAB2IP|C9orf72	-3.08975e+16	214.0	0.0	0.0
1	0	0	0	1	-4286170438319950	0.0	0.0	0.0	-2741522372618580	GO:0001573	GO Biological Processes	ganglioside metabolic process	19_GO:0008152 metabolic process	-4286170438319950	1.20552e+16	7176261397505320	ABCA2|B4GALNT1|HEXA|HEXB|CLN6	-3.08929e+16	49.0	0.0	0.0
1	0	0	0	1	-4286170438319950	0.0	0.0	0.0	-2741522372618580	WP5121	WikiPathways	Sphingolipid metabolism in senescence		-4286170438319950	1.20552e+16	7176261397505320	ASAH1|MTOR|GBA1|GLB1|SPTLC1	-3.08929e+16	81.0	0.0	0.0
1	0	0	0	1	-3398982610223230	0.0	0.0	0.0	-4285799731236150	GO:0018279	GO Biological Processes	protein N-linked glycosylation via asparagine	19_GO:0008152 metabolic process	-4285799731236150	1.9166e+16	8338457897960940	STT3A|RPN2|UGGT1|STT3B	-3089224161257170	65.0	0.0	0.0
0	1	1	0	0	0.0	-2.07513e+16	-4281657434662130	0.0	0.0	hsa05213	KEGG Pathway	Endometrial cancer		-4281657434662130	1241543513957300	7.27644e+16	CTNNA2|GSK3B|PIK3R1|APC2|CTNNA3	-3085387813608730	225.0	1.0	1.0
0	0	0	0	1	0.0	0.0	0.0	0.0	-4279537471491410	GO:0015917	GO Biological Processes	aminophospholipid transport	19_GO:0051179 localization	-4279537471491410	3.83321e+16	1.0491e+16	SCARB2|ATP11A|TMEM30A	-3084184406139240	79.0	0.0	0.0
1	0	0	0	1	-3.59554e+16	0.0	0.0	0.0	-4279537471491410	GO:0034205	GO Biological Processes	amyloid-beta formation	19_GO:0008152 metabolic process	-4279537471491410	3.83321e+16	1.0491e+16	PSEN1|NCSTN|BACE1	-3084184406139240	95.0	0.0	0.0
0	0	0	0	1	0.0	0.0	0.0	0.0	-4279537471491410	GO:0160063	GO Biological Processes	multi-pass transmembrane protein insertion into ER membrane	19_GO:0051179 localization	-4279537471491410	3.83321e+16	1.0491e+16	NOMO1|TMCO1|CCDC47	-3084184406139240	226.0	1.0	1.0
0	0	0	0	1	0.0	0.0	0.0	0.0	-4272718505758510	GO:0050768	GO Biological Processes	negative regulation of neurogenesis	19_GO:0032502 developmental process	-4272718505758510	6133130544993660	5902761449796590	GDI1|PSEN1|SLIT1|THY1|SYNGAP1|RAPGEF2|SEMA6B|RTN4	-3.07767e+16	144.0	0.0	0.0
0	1	0	1	0	0.0	-2.14363e+16	0.0	-2.82128e+16	0.0	R-HSA-9006925	Reactome Gene Sets	Intracellular signaling by second messengers		-427147125981532	2310034625568600	4589351646529180	ADCY5|CALM1|CSNK2B|ATN1|MTOR|GSK3B|ITPR1|PDPK1|PIK3R1|PIK3R2|PRKCG|PSMA7|PSMC4|PSMC5|PSMC6|PSMD1|PSMD2|PSMD3|TNKS|PSMF1|PSMD6|PSME3|STUB1|RRAGB|CAMKK2|PIP5K1C|PIP4K2C	-2.87667e+16	52.0	0.0	0.0
0	0	0	0	1	0.0	0.0	0.0	0.0	-2377031418021170	hsa04919	KEGG Pathway	Thyroid hormone signaling pathway		-4.26841e+16	3277321851702010	4976762776972550	ACTB|ATP1A3|ATP2A2|CREBBP|MTOR|GSK3B|PDPK1|PIK3R1|PIK3R2|PRKCG|SLC2A1|SLC16A2|MED24|PLCB1|MED4	-2.87409e+16	87.0	0.0	0.0
1	0	0	1	1	-2290266461387280	0.0	0.0	-2.11317e+16	-4263742816757940	GO:0009395	GO Biological Processes	phospholipid catabolic process	19_GO:0008152 metabolic process	-4263742816757940	1.22336e+16	721862877151757	SMPD1|ABHD16A|PNPLA6|ABHD6|PLBD2	-3070520888786540	227.0	1.0	1.0
0	0	0	0	1	0.0	0.0	0.0	0.0	-4252310989714210	GO:0007009	GO Biological Processes	plasma membrane organization	19_GO:0009987 cellular process	-4252310989714210	6092513786417540	5875640236755220	ANK2|ATP2A2|CLN3|FOLR1|SMPD1|SYT11|ARL8B|ANO3	-3060302175609530	228.0	1.0	1.0
0	1	0	0	0	0.0	-4250834683563270	0.0	0.0	0.0	GO:0043666	GO Biological Processes	regulation of phosphoprotein phosphatase activity	19_GO:0008152 metabolic process	-4250834683563270	1.22257e+16	7.21154e+16	CALM1|HTT|PPP6R1|PPP6R3|PPP1R1B	-3.05913e+16	218.0	0.0	0.0
0	1	0	0	1	0.0	-3112262841117800	0.0	0.0	-2.68641e+16	GO:0010508	GO Biological Processes	positive regulation of autophagy	19_GO:0048518 positive regulation of biological process	-4250477726459830	2996200466200460	4859468556671600	GSK3B|HTT|EPM2A|NPRL3|SQSTM1|TMEM59|ATG13|SPTLC1|CAMKK2|USP20|WDR45|UFL1|VPS13D|SCOC|PIP4K2C|MTDH|C9orf72	-2.85713e+16	31.0	0.0	0.0
1	0	0	0	0	-4244369534774430	0.0	0.0	0.0	0.0	GO:0042407	GO Biological Processes	cristae formation	19_GO:0009987 cellular process	-4244369534774430	1.80024e+16	8076365051853620	AFG3L2|IMMT|SAMM50|SLC25A46	-3.05478e+16	141.0	0.0	0.0
0	0	0	1	1	0.0	0.0	0.0	-2.11317e+16	-2.09957e+16	GO:0042220	GO Biological Processes	response to cocaine	19_GO:0050896 response to stimulus	-4242216540321800	5062416307097150	5.52625e+16	CHRNB2|PTK2B|ND6|SLC6A1|SLC6A3|SMPD1|UBE3A|EFTUD2|PPP1R1B	-2850786772562150	200.0	0.0	0.0
1	1	0	0	0	-4181517871416610	-3035221585002030	0.0	0.0	0.0	GO:0019439	GO Biological Processes	aromatic compound catabolic process	19_GO:0008152 metabolic process	-4236056460797520	2222245870071950	4.52709e+16	ACAA1|ACAT1|ABCD1|ATM|COMT|DNASE2|EPHX1|FHIT|HPRT1|MLH1|NCBP1|PNP|PARN|QDPR|RNH1|SLC6A3|VCP|SUCLA2|SKIC3|CTIF|LRPPRC|PDE10A|CNOT1|EXOSC3|TRNT1|NBAS|SAMD4B|ELAC2|FITM2	-2846062378583030	209.0	0.0	0.0
0	0	0	1	1	0.0	0.0	0.0	-4112103704993860	-3120886760265340	R-HSA-74752	Reactome Gene Sets	Signaling by Insulin receptor		-4234050895556130	3868838478594570	5157769244115490	ATP6V1A|ATP6V0C|ATP6V0A1|ATP6AP1|CTSD|PDPK1|PIK3R1|PIK3R2|ATP6V0D1|PIK3R4|ATP6V1D|ATP6V1H	-2.84453e+16	93.0	0.0	0.0
1	0	0	0	0	-2026995236741090	0.0	0.0	0.0	0.0	GO:0010638	GO Biological Processes	positive regulation of organelle organization	19_GO:0048518 positive regulation of biological process	-4226963588323710	1977575574032260	4405750266839980	ATM|ATR|DKC1|DYNC1H1|PTK2B|MTOR|GRN|ARHGAP35|GSK3B|HTT|MAP1B|MAPT|MECP2|MRE11|PARN|PLA2G6|CUL3|RUVBL1|TNKS|CDC23|SYNJ1|CKAP5|CCT7|CAMKK2|DSTN|WDR45|PNKP|CCT5|CNOT1|PLCB1|DDHD2|GIT1|VPS13D|SMPD3|VPS35|KCTD17|PIP4K2C|CARMIL2	-2.83888e+16	96.0	0.0	0.0
1	0	0	0	0	-3.68682e+16	0.0	0.0	0.0	0.0	GO:1904358	GO Biological Processes	positive regulation of telomere maintenance via telomere lengthening	19_GO:0048518 positive regulation of biological process	-4226487976340610	5716121716121710	5691294011418490	ATM|ATR|DKC1|PARN|TNKS|CCT7|PNKP|CCT5	-2.83888e+16	118.0	0.0	0.0
0	0	1	0	1	0.0	0.0	-2666619890699950	0.0	-3.53088e+16	WP4698	WikiPathways	Vitamin D-sensitive calcium signaling in depression		-4226487976340610	5716121716121710	5691294011418490	ATP2B1|ATP2B2|ATP2B3|CYP27A1|GRIN1|ITPR1|KCNQ2|KCNQ3	-2.83888e+16	126.0	0.0	0.0
1	0	0	0	1	-4130475548694600	0.0	0.0	0.0	-421904500628647	GO:0019915	GO Biological Processes	lipid storage	19_GO:0051179 localization	-421904500628647	1.19788e+16	7129628035602960	GBA1|HEXA|LIPA|NPC1|CDS2	-3033946592620000	229.0	1.0	1.0
1	0	0	0	0	-421864278200598	0.0	0.0	0.0	0.0	GO:0007030	GO Biological Processes	Golgi organization	19_GO:0009987 cellular process	-421864278200598	468812003968254	5439706965198090	VRK1|USO1|GBF1|ZW10|COG5|ARFGEF1|SYNE1|TRAPPC11|TANGO2|VPS13B	-3.03384e+16	230.0	1.0	1.0
0	0	0	0	1	0.0	0.0	0.0	0.0	-2.48562e+16	GO:0061912	GO Biological Processes	selective autophagy	19_GO:0008152 metabolic process	-4218560715317230	4154395604395600	5238750175055060	ATM|CALR|PEX2|RAB7A|SQSTM1|ATG13|WDFY3|UFL1|UBQLN1|ATG2B|WDR81	-2.83142e+16	178.0	0.0	0.0
1	0	0	0	0	-2.71713e+16	0.0	0.0	0.0	0.0	R-HSA-9612973	Reactome Gene Sets	Autophagy		-4.21393e+16	2.97636e+16	4.82726e+16	ATM|CSNK2B|DYNC1H1|MTOR|GFAP|LAMP2|TUBB2A|VCP|SQSTM1|ATG13|RRAGB|TUBB4A|WDR45|CHMP4A|PIK3R4|DYNC1LI1|ARL13B	-2.82727e+16	231.0	1.0	1.0
0	0	1	0	0	0.0	0.0	-4212152042530020	0.0	0.0	GO:0051491	GO Biological Processes	positive regulation of filopodium assembly	19_GO:0048518 positive regulation of biological process	-4212152042530020	1.85831e+16	8190208043098640	DPYSL3|PALM|PIK3R1|NEURL1	-3.02854e+16	147.0	0.0	0.0
1	0	0	0	0	-4209276936748270	0.0	0.0	0.0	0.0	WP241	WikiPathways	One-carbon metabolism		-4209276936748270	1.16395e+16	7028783574342750	ATIC|DNMT1|GART|MTHFD1|MTFMT	-3026260048034190	192.0	0.0	0.0
1	0	0	0	0	-4204372774708940	0.0	0.0	0.0	0.0	CORUM:1211	CORUM	Ubiquitin E3 ligase (AHR, ARNT, DDB1, TBL3, CUL4B, RBX1)		-4204372774708940	3.37545e+16	9838798211457320	DDB1|CUL4B|TBL3	-3022836605062740	164.0	0.0	0.0
1	0	0	0	0	-4204372774708940	0.0	0.0	0.0	0.0	CORUM:435	CORUM	BASC (Ab 81) complex (BRCA1-associated genome surveillance complex)		-4204372774708940	3.37545e+16	9838798211457320	ATM|MLH1|RFC1	-3022836605062740	204.0	0.0	0.0
1	0	0	0	0	-4204372774708940	0.0	0.0	0.0	0.0	CORUM:6602	CORUM	AP5-SPG11-SPG15 complex		-4204372774708940	3.37545e+16	9838798211457320	AP5Z1|ZFYVE26|SPG11	-3022836605062740	232.0	1.0	1.0
1	0	0	0	0	-4204372774708940	0.0	0.0	0.0	0.0	GO:0000425	GO Biological Processes	pexophagy	19_GO:0008152 metabolic process	-4204372774708940	3.37545e+16	9838798211457320	ATM|PEX2|SQSTM1	-3022836605062740	178.0	0.0	0.0
1	0	0	0	0	-4204372774708940	0.0	0.0	0.0	0.0	GO:0016255	GO Biological Processes	attachment of GPI anchor to protein	19_GO:0008152 metabolic process	-4204372774708940	3.37545e+16	9838798211457320	GPAA1|PIGT|PIGS	-3022836605062740	213.0	0.0	0.0
1	0	0	0	0	-2095037142885600	0.0	0.0	0.0	0.0	M163	Canonical Pathways	PID LIS1 PATHWAY		-4193287354623220	6609265734265730	5887697614962480	DAB1|DCX|DYNC1H1|MAP1B|PAFAH1B1|RELN|VLDLR	-2808517216532320	109.0	0.0	0.0
0	1	0	0	0	0.0	-3.79168e+16	0.0	0.0	0.0	GO:1902115	GO Biological Processes	regulation of organelle assembly	19_GO:0050789 regulation of biological process	-4191471440015760	2.60647e+16	4665054755579610	DYNC1H1|PTK2B|GAP43|GRID2|ARHGAP35|GSK3B|HTT|PTPRD|SPTBN2|CDKL5|STAM|FEZ2|WDR45|CNOT1|CHMP4A|UBQLN2|CHMP5|VPS11|KCTD17|PIP4K2C|C9orf72	-2.80764e+16	233.0	1.0	1.0
1	0	0	1	0	-2.69917e+16	0.0	0.0	-3.44466e+16	0.0	GO:0010821	GO Biological Processes	regulation of mitochondrion organization	19_GO:0050789 regulation of biological process	-4177745509191640	2.95678e+16	4795307980507740	FXN|GSK3B|HTT|MAPT|OPA1|RAP1GDS1|PLA2G6|SQSTM1|HUWE1|CAMKK2|DDHD2|ATP13A2|GHITM|VPS13C|VPS13D|VPS35|TMEM135	-2796267277899680	234.0	1.0	1.0
0	0	1	0	1	0.0	0.0	-2189309760410720	0.0	-2749188342058500	GO:1901653	GO Biological Processes	cellular response to peptide	19_GO:0050896 response to stimulus	-4176297840659970	2.28051e+16	4515175554977540	PARP1|APP|ATP1A3|CACNA1A|EPRS1|GSK3B|LRP1|MAP1B|PDPK1|PIK3R1|PIK3R2|PRKDC|PRNP|LGMN|PSEN1|RANGAP1|RAP1GDS1|YWHAG|SLC27A4|WDTC1|PLCB1|SLC39A14|BACE1|CHMP5|SMPD3|SLC30A10|ARID1B	-2.79529e+16	100.0	0.0	0.0
0	0	1	0	0	0.0	0.0	-4175594441303180	0.0	0.0	GO:0030837	GO Biological Processes	negative regulation of actin filament polymerization	19_GO:0048519 negative regulation of biological process	-4175594441303180	1.18048e+16	7063460948394080	ADD2|DMTN|SPTB|SPTBN1|TMOD2	-2.99818e+16	36.0	0.0	0.0
0	1	1	0	0	0.0	-2015089680972640	-4175594441303180	0.0	0.0	GO:0061572	GO Biological Processes	actin filament bundle organization	19_GO:0009987 cellular process	-4175594441303180	1.18048e+16	7063460948394080	ADD2|DPYSL3|DMTN|PTK2B|FHDC1	-2.99818e+16	36.0	0.0	0.0
1	0	0	0	1	-4166278189701820	0.0	0.0	0.0	-2.4234e+16	GO:0032006	GO Biological Processes	regulation of TOR signaling	19_GO:0050896 response to stimulus	-4166278189701820	5148986077481840	5537129799287990	ATM|GBA1|NPC1|RELN|SEC13|EPM2A|USP9X|LARS1|C9orf72	-2990031192787310	235.0	1.0	1.0
[truncated: 1,118 more rows]

## Sheet: Shared pathways
_MEMBER_Ataxia	_MEMBER_Chorea	_MEMBER_DCD	_MEMBER_Dystonia	_MEMBER_Myoclonus	_LogP_Ataxia	_LogP_Chorea	_LogP_DCD	_LogP_Dystonia	_LogP_Myoclonus	ID	Category	Description	PARENT_GO	LogP	Enrichment	Z-score	Genes	Log(q-value)	GROUP_ID	FirstInGroupByEnrichment	FirstInGroupByLogP
[truncated: 543 more rows]
